# Supplementary material for: The cobalt(ii)-catalyzed acyloxylation of picolinamides with bifunctional silver carboxylateviaC–H bond activation
Source: Royal Society of Chemistry journal article supplement (doi:10.1039/d2qo01131j), 2022-01-01
Supplement: d2qo01131j1.pdf [file d2qo01131j1.pdf]

## Supporting Information

### Table of Contents

|                                                                                                                       |      |
|-----------------------------------------------------------------------------------------------------------------------|------|
| 1. General experiment information.                                                                                    | S1   |
| <b>Table S1.</b> Optimization of acyloxylation reaction with metal catalysts                                          | S2   |
| <b>Table S2.</b> Optimization of acyloxylation reaction with silver salts                                             | S2   |
| <b>Table S3.</b> Optimization of acyloxylation reaction with other conditions                                         | S3   |
| 2. Preliminary mechanistic studies.                                                                                   | S4   |
| 2.1 Kinetic isotope effect of this transformation                                                                     | S4   |
| 2.2 The effects of addition of radical scavengers of this reaction                                                    | S7   |
| 2.3 Study of intermediate.                                                                                            | S8   |
| 3. Gram-scale experiments                                                                                             | S9   |
| 4. Synthetic transformation                                                                                           | S9   |
| <b>Scheme S1.</b> Pathways to obtain acetamide intermediate                                                           | S11  |
| <b>Scheme S2.</b> Failure synthetic strategies to obtain macrocyclic compound.                                        | S11  |
| 5. Single crystal data of product <b>3aa-8</b>                                                                        | S12  |
| 6. Characterization data of silver carboxylates <b>2a-1-2d-12</b>                                                     | S22  |
| 7. Characterization data of products <b>3aa-1-3wa</b>                                                                 | S33  |
| 8. Copies of <sup>1</sup> H, <sup>13</sup> C and <sup>19</sup> F NMR spectra of silver carboxylates <b>2a-1-2d-12</b> | S59  |
| 9. Copies of <sup>1</sup> H, <sup>13</sup> C and <sup>19</sup> F NMR spectra of products <b>3aa-1-3wa</b>             | S131 |
| 10. Failure examples of C–H bond acyloxylation                                                                        | S215 |
| 11. References                                                                                                        | S216 |

## 1. General experiment information.

**General experimental.** Unless otherwise noted, reactions were carried out in single-neck or two-neck flask round bottom flasks, with magnetic stirring. Air- or water-sensitive liquids and solutions were transferred *via* syringe. Organic solutions were concentrated by rotary evaporation at 23–40 °C under 40 Torr (house vacuum). Analytical thin layer chromatography (TLC) was performed with Silicycle normal phase glass plates (0.25 mm, 60-A pore size, 230–400 mesh). Visualization was done under a 254 nm UV light source. Purification of reaction products was generally done by flash chromatography with Silicycle 200–300 mesh silica gel.

**Materials.** Unless otherwise indicated, all reagents and solvents were purchased for commercial suppliers and used without additional purification. Distilled water was used in the reactions. Picolinamides **1a–1z** and **D-1a** were prepared according to literature procedures.<sup>[S1]</sup>

**Instrumentation.** <sup>1</sup>H NMR, <sup>13</sup>C NMR and <sup>19</sup>F NMR spectra were recorded on a 400 MHz spectrometer (400 MHz for <sup>1</sup>H; 100 MHz for <sup>13</sup>C; 376 MHz for <sup>19</sup>F NMR) at room temperature. All chemical shift values are quoted in ppm referenced residual CHCl<sub>3</sub> at 7.26 ppm, Pyridine at 8.72 and DMSO at 2.50 ppm for <sup>1</sup>H NMR; relative to residual CHCl<sub>3</sub> at 77.0 ppm, Pyridine at 123.44 and DMSO at 40.0 ppm for <sup>13</sup>C unless otherwise noted. HRMS (ion trap) were obtained from mass spectrometer (ESI). Melting points were recorded on an electrothermal digital melting point apparatus and were uncorrected.

**The general procedure for silver carboxylates of 2a-1–2d-16:** The substrate carboxylic acid **1** (6 mmol) and silver oxide (2 mmol) were added to 25.0 mL round-bottomed flask, followed by addition of 20.0 mL acetonitrile. The mixture was stirred at room temperature for 12 h. This solid was recovered by filtration and washed with 10 mL of cold acetonitrile (stored in dark). Subsequent drying under vacuum led to the desired product **2**.

**The general procedure for new compounds of 3aa-1–3wa:** The substrate picolinamides **1** (0.2 mmol), substrate silver carboxylates **2** (0.44 mmol) and CoCl<sub>2</sub> (0.02 mmol, 2.6 mg) were added to 5.0 mL round-bottomed flask, followed by addition of 2.0 mL toluene. The mixture was stirred at 110 °C for 12 h. After cooling to room temperature, the reaction mixture was added with 10 mL of water and then extracted by ethyl acetate (10 mL×3), the organic layers were combined, dried with anhydrous Na<sub>2</sub>SO<sub>4</sub>, and then filtered. The filtrate was concentrated under vacuum, and the resulting residue was purified by column chromatography (Silica Gel: 200–300 mesh) to afford the desired product **3**.

**Table S1.** Optimization of acyloxylation reaction with metal catalysts<sup>[a]</sup>
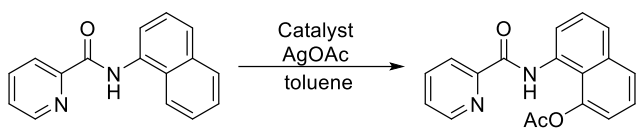

| Entry    | Catalyst (x mol%)                         | Yield (%) <sup>[b]</sup> | r.r. (%) <sup>[b],[c]</sup> |
|----------|-------------------------------------------|--------------------------|-----------------------------|
| 1        | none                                      | N.R.                     | >95%                        |
| 2        | CuCl <sub>2</sub> ·2H <sub>2</sub> O (20) | N.R.                     | >95%                        |
| 3        | PdCl <sub>2</sub> (20)                    | N.R.                     | >95%                        |
| 4        | CuI (20)                                  | N.R.                     | 70%                         |
| 5        | NiCl <sub>2</sub> (20)                    | N.R.                     | >95%                        |
| 6        | [Rh(COD)Cl] <sub>2</sub> (20)             | N.R.                     | 70%                         |
| 7        | [Ir(COD)Cl] <sub>2</sub> (20)             | N.R.                     | 60%                         |
| 8        | Co(acac) <sub>3</sub> (20)                | N.R.                     | 90%                         |
| <b>9</b> | <b>Co(OAc)<sub>2</sub> (20)</b>           | <b>90%</b>               | <b>8%</b>                   |

<sup>[a]</sup> The reaction was carried out with picolinamide **1a** (0.2 mmol, 49.6 mg), **catalyst** (20 mol%) and AgOAc (0.4 mmol, 56.6mg) in 2.0 mL of toluene at 100 °C for 24 h. <sup>[b]</sup> Determined by <sup>1</sup>H-NMR. <sup>[c]</sup> r.r. = Recovery rate.

**Table S2.** Optimization of acyloxylation reaction with silver salts<sup>[a]</sup>
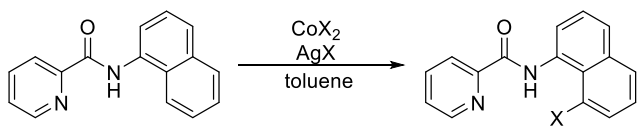

| Entry            | CoX <sub>2</sub>     | AgX                | Yield (%) <sup>[b]</sup> | r.r. (%) <sup>[b],[c]</sup> |
|------------------|----------------------|--------------------|--------------------------|-----------------------------|
| 1                | CoCl <sub>2</sub>    | AgF                | N.R.                     | >95%                        |
| 2                | CoCl <sub>2</sub>    | AgCl               | N.R.                     | 90%                         |
| 3                | CoBr <sub>2</sub>    | AgBr               | N.R.                     | >95%                        |
| 4                | CoI <sub>2</sub>     | AgI                | N.R.                     | 90%                         |
| 5                | Co(OAc) <sub>2</sub> | AgOAc              | 90                       | <5%                         |
| 6 <sup>[d]</sup> | CoCl <sub>2</sub>    | AgOTfa             | N.R.                     | >95%                        |
| 7 <sup>[d]</sup> | CoCl <sub>2</sub>    | AgOTf              | N.R.                     | >95%                        |
| 8                | CoCl <sub>2</sub>    | AgSCN              | N.R.                     | >95%                        |
| 9                | CoCl <sub>2</sub>    | AgSeCN             | N.R.                     | >95%                        |
| 10               | CoCl <sub>2</sub>    | AgOCN              | N.R.                     | >95%                        |
| 11               | CoCl <sub>2</sub>    | AgOMs              | N.R.                     | 90%                         |
| 12               | CoCl <sub>2</sub>    | AgOTs              | N.R.                     | 90%                         |
| 13               | CoCl <sub>2</sub>    | Tol-SOOAg          | N.R.                     | 95%                         |
| 15               | CoCl <sub>2</sub>    | AgNBn <sub>2</sub> | N.R.                     | >95%                        |

|    |                   |                                                                                   |      |      |
|----|-------------------|-----------------------------------------------------------------------------------|------|------|
| 20 | CoCl <sub>2</sub> | CH <sub>3</sub> COSAg                                                             | N.R. | >95% |
| 21 | CoCl <sub>2</sub> | 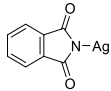 | N.R. | >95% |
| 22 | CoCl <sub>2</sub> | AgNTf <sub>2</sub>                                                                | N.R. | >95% |
| 23 | CoCl <sub>2</sub> | AgBF <sub>4</sub>                                                                 | N.R. | >95% |
| 24 | CoCl <sub>2</sub> | Ag <sub>2</sub> WO <sub>3</sub>                                                   | N.R. | >95% |

<sup>[a]</sup>The reaction was carried out with picolinamide **1a** (0.2 mmol, 49.6 mg), Co catalyst (20 mol%) and AgX (0.4 mmol, 2.0 eq) in 2.0 mL of toluene at 100 °C for 24 h. <sup>[b]</sup>Determined by <sup>1</sup>H-NMR. <sup>[c]</sup>r.r. = Recovery rate. <sup>[d]</sup>Quenched with water before <sup>1</sup>H-NMR analysis.

**Table S3.** Optimization of acyloxylation reaction with other conditions<sup>[a]</sup>

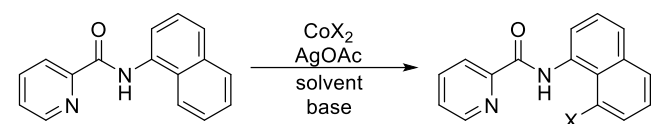

| Entry             | CoX <sub>2</sub> (x mol%)  | AgOAc (x eq.) | solvent     | additive (x eq.)                      | Yield (%) <sup>[b]</sup> |
|-------------------|----------------------------|---------------|-------------|---------------------------------------|--------------------------|
| 1                 | Co(OAc) <sub>2</sub> (20)  | 2.0           | DMSO        | -                                     | 9%                       |
| 2                 | Co(OAc) <sub>2</sub> (20)  | 2.0           | DME         | -                                     | 82%                      |
| 3                 | Co(OAc) <sub>2</sub> (20)  | 2.0           | 1,4-dioxane | -                                     | 58%                      |
| 4                 | Co(OAc) <sub>2</sub> (20)  | 2.0           | 18-crown-6  | -                                     | 20%                      |
| 5                 | Co(OAc) <sub>2</sub> (20)  | 2.0           | toluene     | -                                     | 90%                      |
| 6                 | Co(OAc) <sub>2</sub> (20)  | 2.0           | toluene     | Cs <sub>2</sub> CO <sub>3</sub> (2.0) | 2%                       |
| 7                 | Co(OAc) <sub>2</sub> (20)  | 2.0           | toluene     | KOAc (2.0)                            | 50%                      |
| 8                 | Co(OAc) <sub>2</sub> (20)  | 2.0           | toluene     | DMAP (2.0)                            | N.R.                     |
| 9                 | Co(OAc) <sub>2</sub> (20)  | 2.0           | toluene     | H <sub>2</sub> O (5.0)                | 29%                      |
| 10 <sup>[c]</sup> | Co(OAc) <sub>2</sub> (20)  | 2.0           | toluene     | -                                     | 91%                      |
| 11 <sup>[d]</sup> | Co(OAc) <sub>2</sub> (20)  | 2.0           | toluene     | -                                     | 88%                      |
| 12 <sup>[e]</sup> | Co(OAc) <sub>2</sub> (20)  | 2.0           | toluene     | -                                     | 87%                      |
| 13                | CoF <sub>2</sub> (20)      | 2.0           | toluene     | -                                     | 3%                       |
| 14                | CoCl <sub>2</sub> (20)     | 2.0           | toluene     | -                                     | 91%                      |
| 15                | CoBr <sub>2</sub> (20)     | 2.0           | toluene     | -                                     | 71%                      |
| 16                | CoI <sub>2</sub> (20)      | 2.0           | toluene     | -                                     | 74%                      |
| 17                | CoCO <sub>3</sub> (20)     | 2.0           | toluene     | -                                     | <1%                      |
| 18                | Co(SCN) <sub>2</sub> (20)  | 2.0           | toluene     | -                                     | 67%                      |
| 19                | CoSO <sub>4</sub> (20)     | 2.0           | toluene     | -                                     | 8%                       |
| 20                | Co(acac) <sub>3</sub> (20) | 2.0           | toluene     | -                                     | N.R.                     |
| 21 <sup>[f]</sup> | CoCl <sub>2</sub> (1)      | 2.0           | toluene     | -                                     | 12%                      |
| 22 <sup>[f]</sup> | CoCl <sub>2</sub> (5)      | 2.0           | toluene     | -                                     | 32%                      |
| 23 <sup>[f]</sup> | CoCl <sub>2</sub> (10)     | 2.0           | toluene     | -                                     | 83%                      |

|                       |                        |     |         |   |     |
|-----------------------|------------------------|-----|---------|---|-----|
| 24                    | CoCl <sub>2</sub> (10) | 2.0 | toluene | - | 60% |
| 25                    | CoCl <sub>2</sub> (10) | 0.6 | toluene | - | 23% |
| 26                    | CoCl <sub>2</sub> (10) | 1.0 | toluene | - | 43% |
| 27                    | CoCl <sub>2</sub> (10) | 2.2 | toluene | - | 82% |
| 28 <sup>[g],[h]</sup> | CoCl <sub>2</sub> (10) | 2.2 | toluene | - | 92% |

<sup>[a]</sup>Unless other notes, the reaction was carried out with picolinamide **1a** (0.2 mmol, 49.6 mg), Co catalyst (20 mmol%) and AgOAc (0.4 mmol, 66.8 mg, 2.0 eq) in 2.0 mL of solvent at 100 °C for 24 h.

<sup>[b]</sup>Determined by <sup>1</sup>H-NMR. <sup>[c]</sup>Under O<sub>2</sub> atmosphere. <sup>[d]</sup>Under N<sub>2</sub> atmosphere. <sup>[e]</sup>Aged Co(OAc)<sub>2</sub>. <sup>[f]</sup>For 48 h. <sup>[g]</sup>For 12 h. <sup>[h]</sup>At 110 °C.

## 2. Preliminary mechanistic studies.

### 2.1 Kinetic isotope effect (KIE) of the transformation

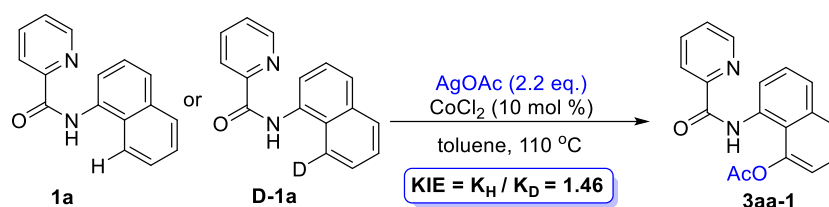

The picolinamides (**2a**, 0.2 mmol, 49.6 mg or **D-2a**, 0.2 mmol, 49.8 mg), AgOAc (**2a-1**, 0.44 mmol, 73.5 mg) and CoCl<sub>2</sub> (0.02 mmol, 2.6 mg) were added to 5.0 mL round-bottomed flask, followed by addition of 2.0 mL xylene as solvent. The mixture was stirred at 110 °C. An aliquot of each reaction mixture was taken at 1 h, 2 h, 3 h and 4 h. After the solvent of each aliquot (0.5 mL) was removed under reduced pressure conditions and analyzed by <sup>1</sup>H NMR spectrum in CDCl<sub>3</sub> (see Figure S1 and Figure S2). The relative yield of **1a** and **D-1a** were shown in Table S4. A sample plot of the initial rate data for the reaction of both **1a** and **D-1a** was shown in Figure S3 and Figure S4. The reaction progress in the early stage (0-4 h) indicated a kinetic isotope effect (KIE) of 1.46.

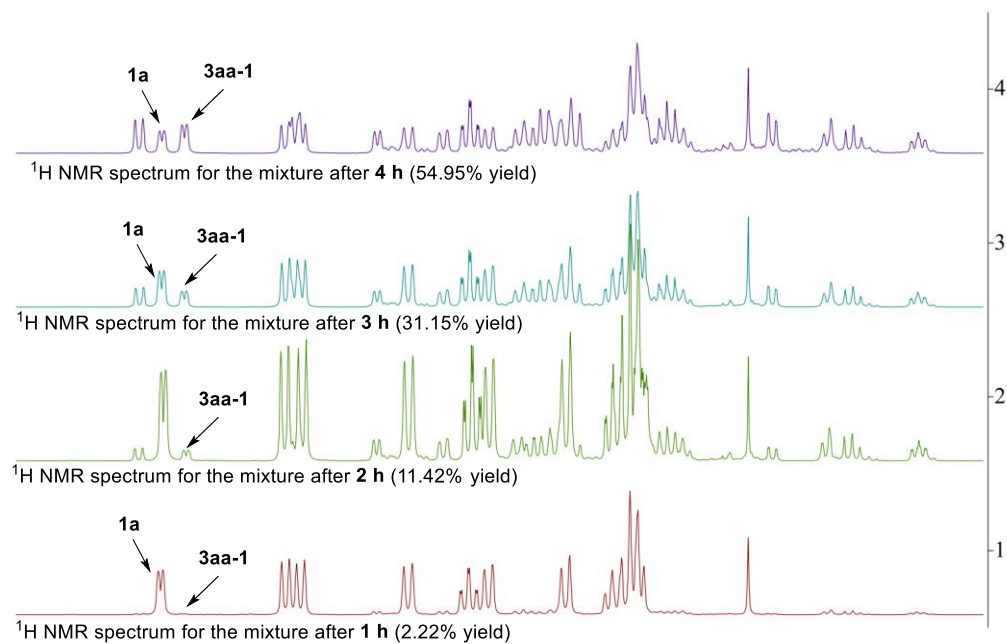

**Figure S1.** The conversion of **1a** was monitored by <sup>1</sup>H NMR method

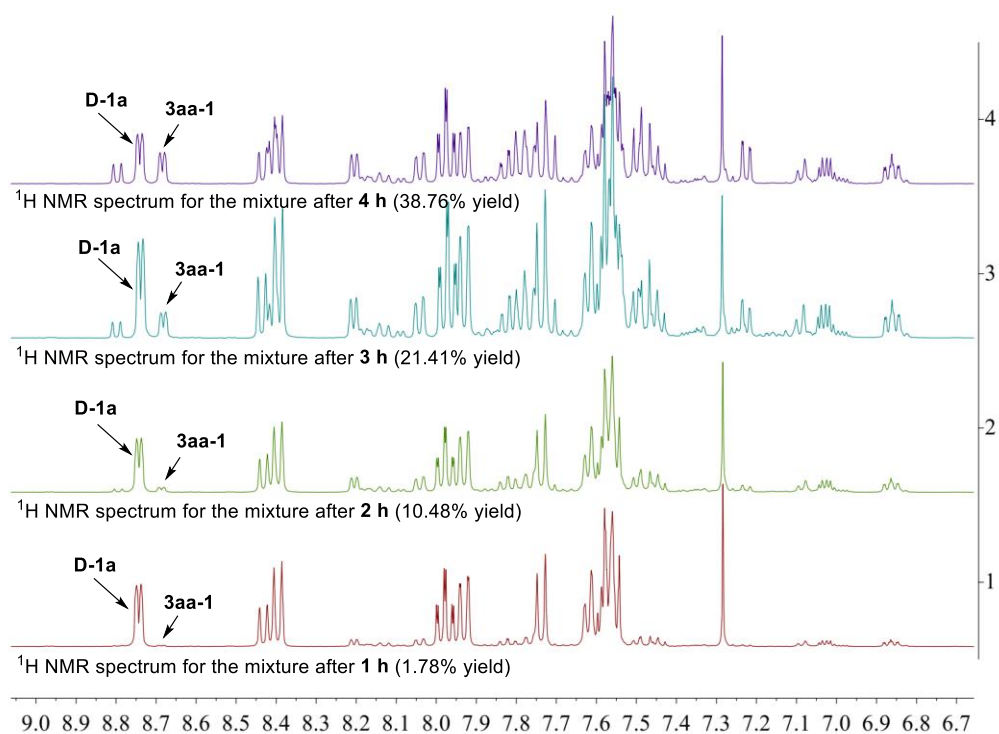

**Figure S2.** The conversion of **D-1a** was monitored by <sup>1</sup>H NMR method

**Table S4.** The relative yields (%) of 3aa-1 was monitored by <sup>1</sup>H NMR method.

| Time [h]                                                    | 1    | 2     | 3     | 4     |
|-------------------------------------------------------------|------|-------|-------|-------|
| <sup>1</sup> H NMR yield of <b>3aa</b> from <b>2a</b> [%]   | 2.22 | 11.42 | 31.15 | 54.95 |
| <sup>1</sup> H NMR yield of <b>3aa</b> from <b>D-2a</b> [%] | 1.78 | 10.48 | 21.41 | 38.76 |

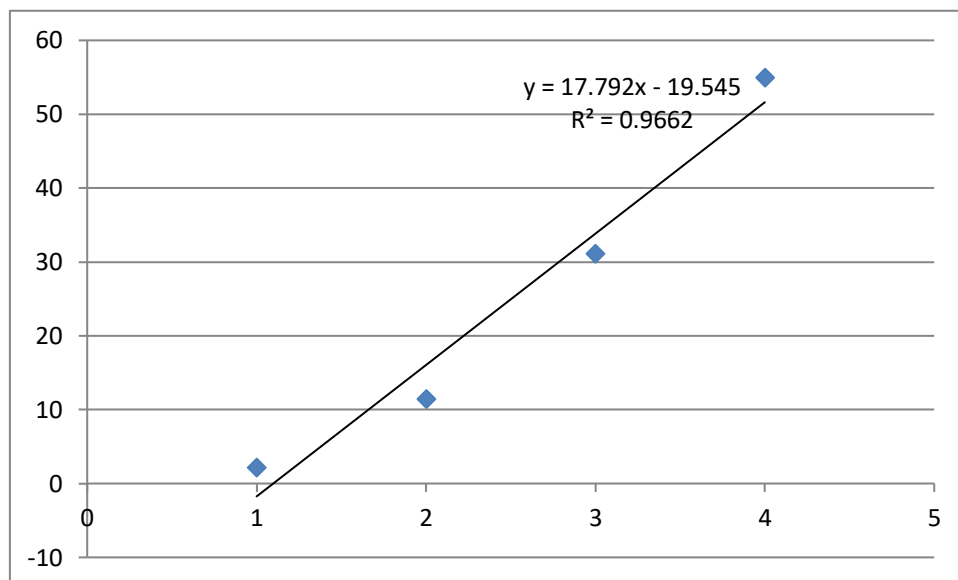

**Figure S3.** The plot of initial rates for the conversion of **1a**

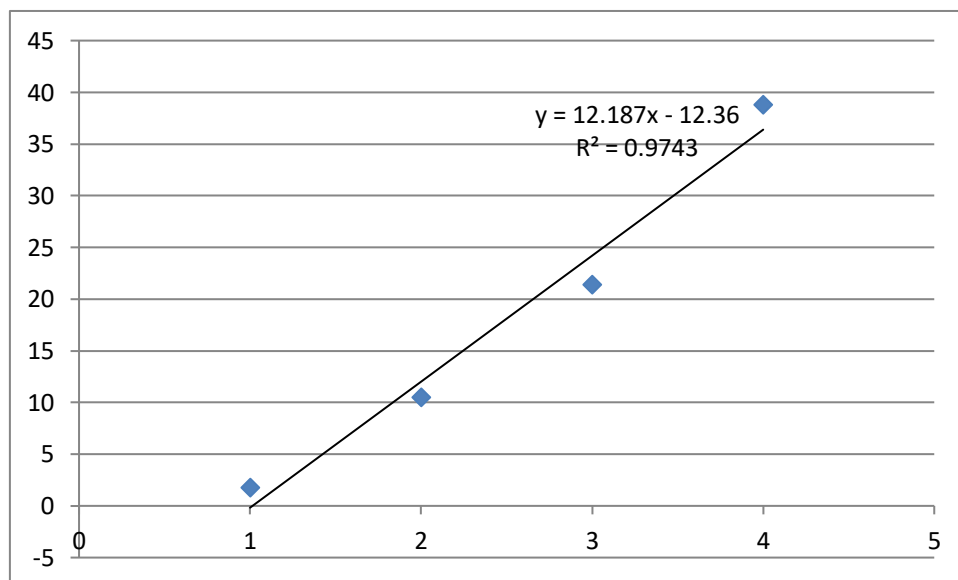

**Figure S4.** The plot of initial rates for the conversion of **D-1a**

## 2.2 The effects of addition of radical scavengers of the reaction.

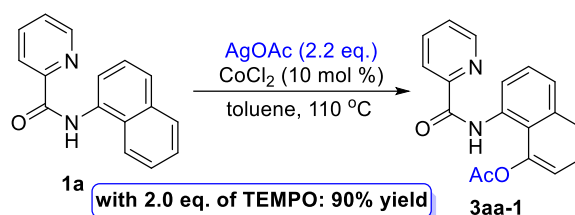

The picolinamides **1a** (0.2 mmol, 49.6 mg), CoCl<sub>2</sub> (0.02 mmol, 2.6 mg), AgOAc (0.44 mmol, 73.5 mg) and **TEMPO** (0.4 mmol, 62.5 mg, 2.0 eq.) were added to 5.0 mL round-bottomed flask, followed by addition of 2.0 mL toluene as solvent. The mixture was stirred at 110 °C for 12 h. After cooling to room temperature, the reaction mixture was added with 10 mL of water and then extracted by ethyl acetate (10 mL×3), the organic layers were combined, dried with anhydrous Na<sub>2</sub>SO<sub>4</sub>, and then filtered. The filtrate was concentrated under vacuum, and the yield of **3aa-1** was determined by <sup>1</sup>H-NMR in CDCl<sub>3</sub>. (The result indicated that radical process should not involve in the acyloxylation reaction.)

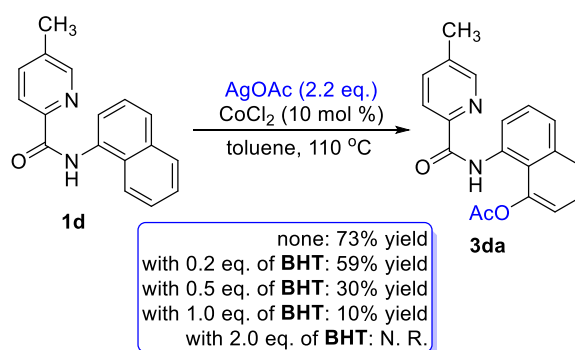

The picolinamides **1a** (0.2 mmol, 49.6 mg), CoCl<sub>2</sub> (0.02 mmol, 2.6 mg), AgOAc (0.44 mmol, 73.5 mg) and **BHT** were added to 5.0 mL round-bottomed flask, followed by addition of 2.0 mL toluene as solvent. The mixture was stirred at 110 °C for 12 h. After cooling to room temperature, the reaction mixture was added with 10 mL of water and then extracted by ethyl acetate (10 mL×3), the organic layers were combined, dried with anhydrous Na<sub>2</sub>SO<sub>4</sub>, and then filtered. The filtrate was concentrated under vacuum, and the yields of **3da** with different loading amount of BTH was determined by <sup>1</sup>H-NMR in CDCl<sub>3</sub>. (The result indicated that radical process should not involve in the acyloxylation reaction. BHT might be oxidized by AgOAc.)

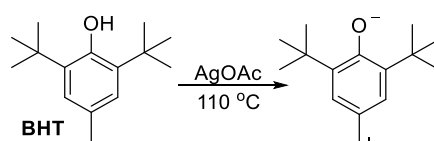



In order to figure out the relationship/reaction between AgOAc and BHT, the following reaction was carried out: AgOAc (0.2 mmol, 53.4 mg) and BHT (0.2 mmol, 44.0 mg) were added to 5.0 mL round-bottomed flask, followed by addition of 2.0 mL toluene as solvent. The mixture was stirred at 110 °C for 12 h. After cooling to room temperature, the reaction mixture was filtered. The filtrate was concentrated under vacuum. A crude <sup>1</sup>H-NMR analysis in CDCl<sub>3</sub> was tested without further purification. (The result of the <sup>1</sup>H-NMR analysis indicated that BHT could be oxidized by AgOAc. The oxidation reaction is similar to the reaction between BHT and Ag<sub>2</sub>O in hexane reported by Prof. Richard Cosstick.<sup>[S2]</sup>)

### 2.3 Study of intermediate.

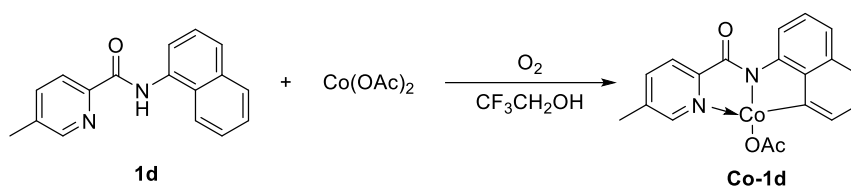

The picolinamides **1a** (0.5 mmol, 124.0 mg) and Co(OAc)<sub>2</sub> (0.5 mmol, 88.5 mg) were added to 25.0 mL round-bottomed flask, followed by addition of 5.0 mL CF<sub>3</sub>CH<sub>2</sub>OH as solvent. The mixture was stirred at 70 °C for 12 h under O<sub>2</sub> atmosphere. After cooling to room temperature, the reaction mixture was concentrated under vacuum to remove CF<sub>3</sub>CH<sub>2</sub>OH, and the resulting residue was purified by column chromatography (PE:EA=1:1, then 100% of EA) to afford the intermediate **Co-1d**.<sup>[S3]</sup>

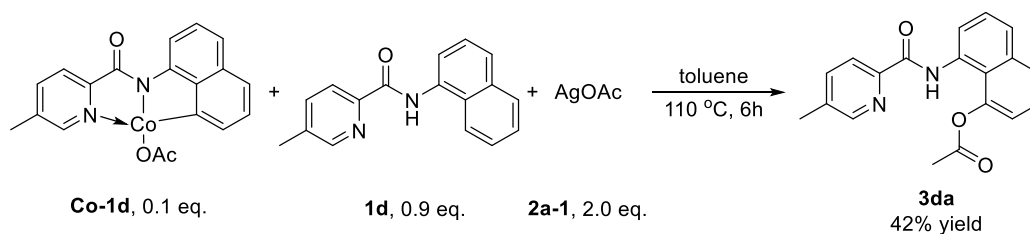

The intermediate **Co-1d** (0.02 mmol, 7.6 mg), picolinamides **1d** (0.18 mmol, 47.2 mg) and AgOAc (0.4 mmol, 66.8 mg) were added to 25.0 mL round-bottomed flask, followed by addition of 5.0 mL toluene as solvent. The mixture was stirred at 110 °C for **6 h**. After cooling to room temperature, the reaction mixture was added with 10 mL of water and then extracted by ethyl acetate (10 mL×3), the organic layers were combined, dried with anhydrous Na<sub>2</sub>SO<sub>4</sub>, and then filtered. The filtrate was concentrated under vacuum, and the resulting residue was purified by column chromatography to afford the desired product **3da** in 42% yield (vs the 73% yield under the optimized condition for **12 h**). (The result indicated that complex **Co-1d** should be the key intermediate for the further acyloxylation reaction to form product **3da**.)

### 3. Gram-scale experiments

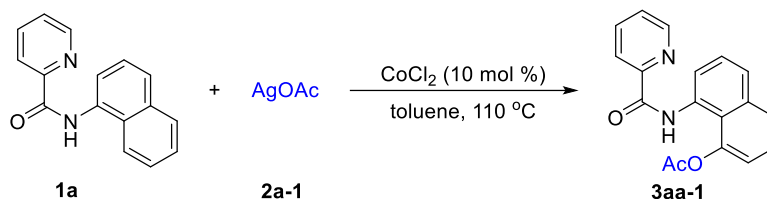

The picolinamides **1a** (0.5 mmol, 1.984 g), CoCl<sub>2</sub> (0.8 mmol, 0.104 g) and AgOAc (17.6 mmol, 2.939 g) were added to 100.0 mL round-bottomed flask, followed by addition of 50.0 mL toluene as solvent. The mixture was stirred at 110 °C for 12 h. After cooling to room temperature, the reaction mixture was added with 100 mL of water and then extracted by ethyl acetate (50 mL×3), the organic layers were combined, dried with anhydrous Na<sub>2</sub>SO<sub>4</sub>, and then filtered. The filtrate was concentrated under vacuum, and the resulting residue was purified by column chromatography to afford the desired product **3aa-1** in 80% yield.

### 4. Synthetic transformation.

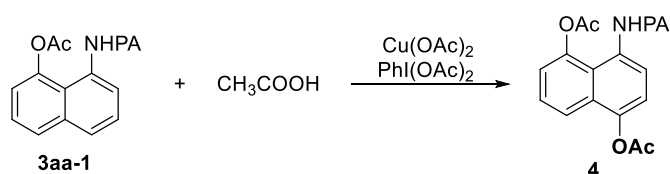

**3aa-1** (61.2 mg, 0.2 mmol, 1.0 equiv.), Cu(OAc)<sub>2</sub> (8.0 mg, 0.04 mmol, 0.2 equiv.), PhI(OAc)<sub>2</sub> (128.8 mg, 0.4 mmol, 2.0 equiv.) and CH<sub>3</sub>COOH (2 mL) were successively added into a sealed tube. The mixture was stirred at 80 °C under air for 12 h. After cooling to ambient temperature, the resulting mixture was filtered through a pad of tripolite and washed with ethyl acetate. The filtrate was concentrated under vacuum and purified by column chromatography (Silica Gel: 200–300 mesh) to afford the desired product **4**.

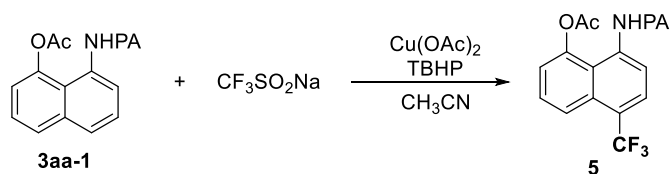

**3aa-1** (61.2 mg, 0.2 mmol, 1.0 equiv.), Cu(OAc)<sub>2</sub> (8.0 mg, 0.04 mmol, 0.2 equiv.), TBHP (5.5 mol / L in decane, 0.2 mmol, 1.0 equiv.), CF<sub>3</sub>SO<sub>2</sub>Na (93.6 mg, 0.6 mmol, 3.0 equiv.), and CH<sub>3</sub>CN (2 mL) were successively added into a sealed tube. The mixture was stirred at 80 °C under air for 48 h. After cooling to ambient temperature, the resulting mixture was filtered through a pad of tripolite and washed

with ethyl acetate. The filtrate was concentrated under vacuum and purified by column chromatography (Silica Gel: 200–300 mesh) to afford the desired product **5**.

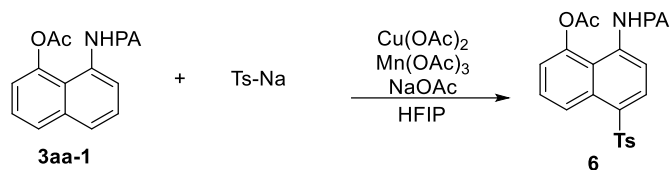

**3aa-1** (61.2 mg, 0.2 mmol, 1.0 equiv.), Cu(OAc)<sub>2</sub> (8.0 mg, 0.04 mmol, 0.2 equiv.), Mn(OAc)<sub>3</sub> (185.6 mg, 0.8 mmol, 4.0 equiv.), NaOAc (49.2 mg, 0.6 mmol, 3.0 equiv.), TsNa (142.4 mg, 0.8 mmol, 4.0 equiv.), and HFIP (2 mL) were added into a sealed tube. The mixture was stirred at 60 °C for 2 h. After cooling to ambient temperature, the resulting mixture was filtered through a pad of tripolite and washed with ethyl acetate. The filtrate was concentrated under vacuum and purified by column chromatography (Silica Gel: 200–300 mesh) to afford the desired product **6**.

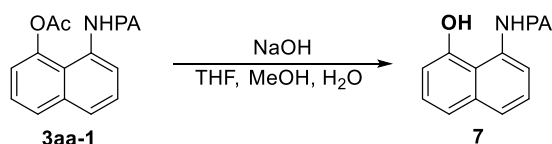

**3aa-1** (61.2 mg, 0.2 mmol, 1.0 equiv.), NaOH (16.0 mg, 0.4 mmol, 2.0 equiv.), and solvent (THF/MeOH/H<sub>2</sub>O, v:v:v=2:1:1, 2 mL) were successively added into a sealed tube. The mixture was stirred at room temperature for 12 h. The reaction mixture was added with 10 mL of H<sub>2</sub>O and then extracted by DCM (10 mL×3), the organic layers were combined, dried with anhydrous Na<sub>2</sub>SO<sub>4</sub>, and then filtered. The filtrate was concentrated under vacuum, and the resulting residue was purified by column chromatography to afford the desired product **7**.

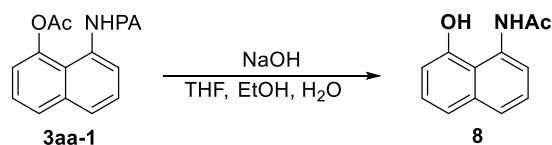

**3aa-1** (61.2 mg, 0.2 mmol, 1.0 equiv.), NaOH (64.0 mg, 1.6 mmol, 8.0 equiv.), and solvent (THF/EtOH/H<sub>2</sub>O, v:v:v=2:1:1, 2 mL) were successively added into a sealed tube. The mixture was stirred at 100 °C for 48 h under N<sub>2</sub> atmosphere. The reaction mixture was added with 10 mL of H<sub>2</sub>O and then extracted by ethyl acetate (10 mL×3), the organic layers were combined, dried with anhydrous Na<sub>2</sub>SO<sub>4</sub>, and then filtered. The filtrate was concentrated under vacuum, and the resulting residue was purified by column chromatography to afford the desired product **8**.

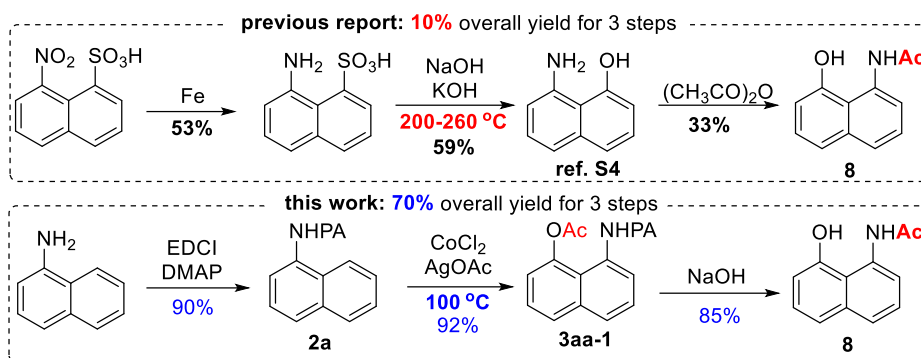

**Scheme S1.** Pathways to obtain acetamide intermediate **8**

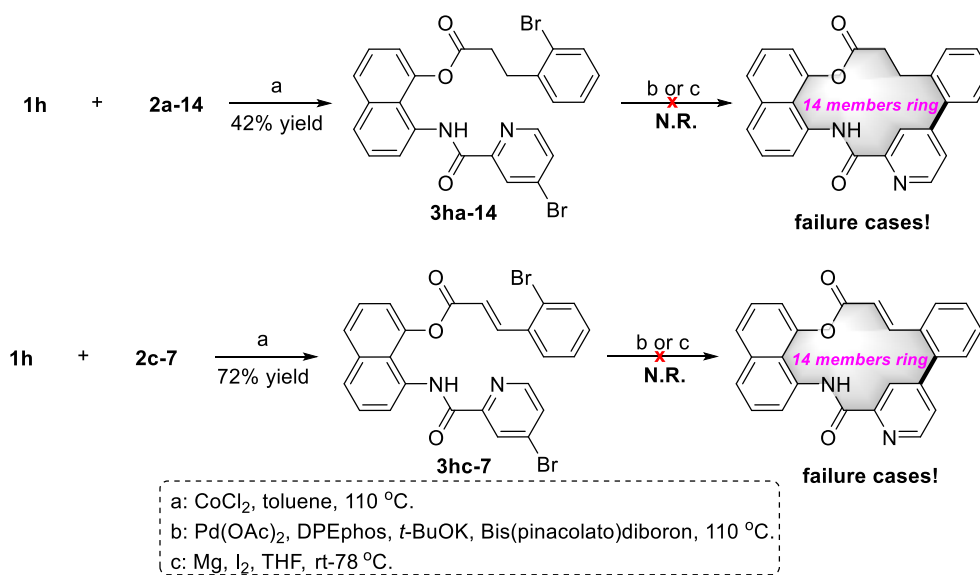

**Scheme S2.** Failure synthetic strategies to obtain macrocyclic compound

## 5. Single crystal data of product **3aa-8** (CCDC 2160352)

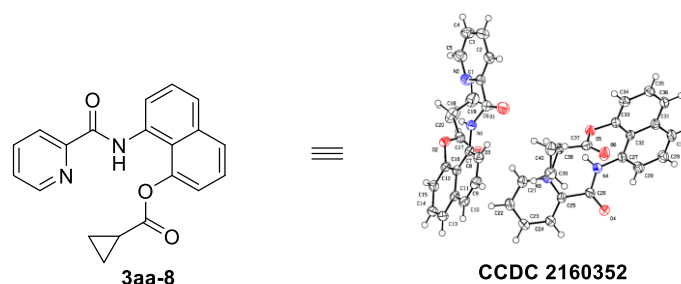

**Figure S5.** The single crystal structure of **3aa**

**Table S3.** Crystal data and structure refinement for **3aa-8**

|                                                           |                                                                                                                                       |
|-----------------------------------------------------------|---------------------------------------------------------------------------------------------------------------------------------------|
| Identification code                                       | 0912CHACC3_0m ( <b>3aa-8</b> )                                                                                                        |
| Empirical formula                                         | C <sub>20</sub> H <sub>16</sub> N <sub>2</sub> O <sub>3</sub>                                                                         |
| Formula weight                                            | 332.35                                                                                                                                |
| Temperature                                               | 150 K                                                                                                                                 |
| Wavelength                                                | 0.71073 Å                                                                                                                             |
| Space group Crystal system                                | triclinic                                                                                                                             |
| Space group IT number                                     | 2                                                                                                                                     |
| Space group name H-M alt                                  | P -1                                                                                                                                  |
| Unit cell dimensions                                      | a = 10.6196(8) Å    alpha = 75.187(2) deg.<br>b = 12.7360(9) Å    beta = 70.684(2) deg.<br>c = 13.6446(9) Å    gamma = 69.536(2) deg. |
| Volume                                                    | 1611.1(2) Å <sup>3</sup>                                                                                                              |
| Z, Calculated density                                     | 4, 1.370 Mg/m <sup>3</sup>                                                                                                            |
| Absorption coefficient                                    | 0.094 mm <sup>-1</sup>                                                                                                                |
| F(000)                                                    | 696                                                                                                                                   |
| Crystal size                                              | 0.15 x 0.08 x 0.05 mm                                                                                                                 |
| Theta range for data collection                           | 2.124 to 26.436 deg.                                                                                                                  |
| Limiting indices                                          | -13<=h<=13, -15<=k<=15, -17<=l<=14                                                                                                    |
| Reflections collected                                     | 4253                                                                                                                                  |
| Completeness to theta = 25.242                            | 99.7%                                                                                                                                 |
| Absorption correction                                     | SADABS-2016/2 (Bruker,2016/2)                                                                                                         |
| The ratio of min. to max. transmission                    | 0.8704                                                                                                                                |
| Refinement method                                         | none                                                                                                                                  |
| Data / restraints / parameters                            | 6559 / 0 / 451                                                                                                                        |
| Goodness-of-fit on F <sup>2</sup>                         | 1.048                                                                                                                                 |
| Final R indices [F <sub>o</sub> >4sigma(F <sub>o</sub> )] | R1 = 0.0532                                                                                                                           |
| R indices (all data)                                      | R1 = 0.0991, wR2 = 0.1295                                                                                                             |
| Absolute structure parameter                              | n/a                                                                                                                                   |
| Largest diff. peak and hole                               | 0.21 and -0.26 e.Å <sup>-3</sup>                                                                                                      |

**Table S4.** Atomic coordinates (  $\times 10^4$ ) and equivalent isotropic displacement parameters ( $\text{\AA}^2 \times 10^3$ ) for **3aa-8**

| Atom | x/a       | y/b       | z/c       | U/eq      |
|------|-----------|-----------|-----------|-----------|
| O6   | 0.9303(2) | 1.0408(1) | 0.8505(1) | 0.0453(5) |
| O5   | 0.7635(2) | 0.9509(1) | 0.9163(1) | 0.0279(4) |
| O4   | 0.5028(2) | 1.2659(1) | 0.7073(1) | 0.0357(4) |
| O3   | 0.5618(2) | 0.7053(1) | 0.6329(1) | 0.0406(4) |
| O2   | 0.7443(2) | 0.5550(1) | 0.5824(1) | 0.0282(4) |
| O1   | 1.0380(2) | 0.5891(2) | 0.7826(1) | 0.0500(5) |
| N4   | 0.5673(2) | 1.1096(2) | 0.8276(1) | 0.0274(4) |
| N3   | 0.6761(2) | 0.9781(2) | 0.6807(1) | 0.0300(4) |
| N2   | 0.8121(2) | 0.4237(2) | 0.8281(1) | 0.0340(5) |
| N1   | 0.9361(2) | 0.5601(2) | 0.6710(1) | 0.0281(4) |
| H9   | 1.24650   | 0.73480   | 0.45410   | 0.0440    |
| H8   | 1.14890   | 0.63650   | 0.61540   | 0.0390    |
| H5   | 0.69610   | 0.31920   | 0.88800   | 0.0510    |
| H4A  | 0.61160   | 1.03650   | 0.83320   | 0.0330    |
| H40B | 1.14390   | 0.76480   | 0.72500   | 0.0460    |
| H40A | 1.15520   | 0.87100   | 0.76910   | 0.0460    |
| H4   | 0.78200   | 0.22880   | 1.03300   | 0.0540    |
| H39B | 1.03440   | 1.00530   | 0.64770   | 0.0500    |
| H39A | 1.02310   | 0.89910   | 0.60370   | 0.0500    |
| H38  | 0.89170   | 0.83510   | 0.77720   | 0.0350    |
| H36  | 0.55160   | 1.14290   | 1.24470   | 0.0370    |
| H35  | 0.74380   | 0.98560   | 1.23490   | 0.0400    |
| H34  | 0.84220   | 0.90160   | 1.08110   | 0.0370    |
| H30  | 0.37150   | 1.28510   | 1.16920   | 0.0400    |
| H3   | 0.95060   | 0.28740   | 1.06310   | 0.0520    |
| H29  | 0.26980   | 1.36390   | 1.03180   | 0.0440    |
| H28  | 0.35980   | 1.28430   | 0.87720   | 0.0390    |
| H24  | 0.54020   | 1.20470   | 0.53270   | 0.0350    |
| H23  | 0.62070   | 1.07740   | 0.41230   | 0.0390    |
| H22  | 0.73560   | 0.88750   | 0.46350   | 0.0400    |
| H21  | 0.77080   | 0.83090   | 0.63010   | 0.0420    |
| H20B | 0.35920   | 0.47830   | 0.73550   | 0.0650    |
| H20A | 0.34700   | 0.61490   | 0.68860   | 0.0650    |
| H2   | 1.03340   | 0.43200   | 0.94000   | 0.0430    |
| H19B | 0.42710   | 0.62630   | 0.82790   | 0.0660    |
| H19A | 0.43930   | 0.48970   | 0.87480   | 0.0660    |
| H18  | 0.60750   | 0.43690   | 0.71280   | 0.0400    |
| H15  | 0.67020   | 0.63250   | 0.41500   | 0.0360    |

---

|     |           |           |           |           |
|-----|-----------|-----------|-----------|-----------|
| H14 | 0.76650   | 0.74180   | 0.25960   | 0.0410    |
| H13 | 0.95990   | 0.79300   | 0.24650   | 0.0390    |
| H10 | 1.14400   | 0.78730   | 0.31800   | 0.0410    |
| H1  | 0.87500   | 0.52800   | 0.67100   | 0.0340    |
| C9  | 1.1644(3) | 0.7154(2) | 0.4630(2) | 0.0364(6) |
| C8  | 1.1063(2) | 0.6556(2) | 0.5595(2) | 0.0326(5) |
| C7  | 0.9892(2) | 0.6242(2) | 0.5747(2) | 0.0267(5) |
| C6  | 0.9679(2) | 0.5421(2) | 0.7635(2) | 0.0312(5) |
| C5  | 0.7665(3) | 0.3418(2) | 0.8984(2) | 0.0425(6) |
| C40 | 1.1019(2) | 0.8442(2) | 0.7383(2) | 0.0385(6) |
| C4  | 0.8161(3) | 0.2880(2) | 0.9858(2) | 0.0448(7) |
| C39 | 1.0274(3) | 0.9269(2) | 0.6636(2) | 0.0416(6) |
| C38 | 0.9450(2) | 0.8883(2) | 0.7716(2) | 0.0291(5) |
| C37 | 0.8843(2) | 0.9687(2) | 0.8467(2) | 0.0296(5) |
| C36 | 0.5900(2) | 1.1090(2) | 1.1828(2) | 0.0310(5) |
| C35 | 0.7039(3) | 1.0164(2) | 1.1771(2) | 0.0331(5) |
| C34 | 0.7624(2) | 0.9661(2) | 1.0855(2) | 0.0312(5) |
| C33 | 0.7044(2) | 1.0100(2) | 1.0029(2) | 0.0262(5) |
| C32 | 0.5850(2) | 1.1059(2) | 1.0040(2) | 0.0246(5) |
| C31 | 0.5278(2) | 1.1558(2) | 1.0984(2) | 0.0282(5) |
| C30 | 0.4092(2) | 1.2524(2) | 1.1066(2) | 0.0333(5) |
| C3  | 0.9159(3) | 0.3217(2) | 1.0030(2) | 0.0435(6) |
| C29 | 0.3490(3) | 1.2988(2) | 1.0256(2) | 0.0365(6) |
| C28 | 0.4033(2) | 1.2510(2) | 0.9329(2) | 0.0329(5) |
| C27 | 0.5176(2) | 1.1576(2) | 0.9209(2) | 0.0265(5) |
| C26 | 0.5540(2) | 1.1639(2) | 0.7305(2) | 0.0257(5) |
| C25 | 0.6088(2) | 1.0863(2) | 0.6504(2) | 0.0244(5) |
| C24 | 0.5870(2) | 1.1270(2) | 0.5516(2) | 0.0293(5) |
| C23 | 0.6348(2) | 1.0521(2) | 0.4807(2) | 0.0329(5) |
| C22 | 0.7026(2) | 0.9408(2) | 0.5105(2) | 0.0337(6) |
| C21 | 0.7221(2) | 0.9078(2) | 0.6104(2) | 0.0346(6) |
| C20 | 0.3951(3) | 0.5430(2) | 0.7270(3) | 0.0545(8) |
| C2  | 0.9644(3) | 0.4068(2) | 0.9308(2) | 0.0357(6) |
| C19 | 0.4445(3) | 0.5499(2) | 0.8124(2) | 0.0547(8) |
| C18 | 0.5495(2) | 0.5180(2) | 0.7121(2) | 0.0334(5) |
| C17 | 0.6131(2) | 0.6043(2) | 0.6417(2) | 0.0286(5) |
| C16 | 0.8040(2) | 0.6249(2) | 0.4936(2) | 0.0266(5) |
| C15 | 0.7486(2) | 0.6551(2) | 0.4101(2) | 0.0299(5) |
| C14 | 0.8068(2) | 0.7192(2) | 0.3171(2) | 0.0338(5) |
| C13 | 0.9212(2) | 0.7491(2) | 0.3096(2) | 0.0324(5) |
| C12 | 0.9235(2) | 0.6529(2) | 0.4911(2) | 0.0265(5) |
| C11 | 0.9836(2) | 0.7159(2) | 0.3940(2) | 0.0291(5) |

---

|     |           |           |           |           |
|-----|-----------|-----------|-----------|-----------|
| C10 | 1.1046(2) | 0.7458(2) | 0.3825(2) | 0.0338(6) |
| C1  | 0.9102(2) | 0.4541(2) | 0.8452(2) | 0.0285(5) |

**Table S5.** Bond lengths [Å] and angles [deg] for **3aa-8**

|         |          |
|---------|----------|
| O2-C17  | 1.375(3) |
| O2-C16  | 1.413(2) |
| O5-C33  | 1.410(2) |
| O5-C37  | 1.374(3) |
| O4-C26  | 1.222(2) |
| O3-C17  | 1.201(3) |
| O6-C37  | 1.200(3) |
| O1-C6   | 1.225(3) |
| N1-H1   | 0.8800   |
| N1-C7   | 1.412(3) |
| N1-C6   | 1.355(3) |
| N4-H4A  | 0.8800   |
| N4-C26  | 1.357(3) |
| N4-C27  | 1.414(3) |
| N3-C25  | 1.341(3) |
| N3-C21  | 1.336(3) |
| N2-C1   | 1.335(3) |
| N2-C5   | 1.333(3) |
| C33-C32 | 1.419(3) |
| C33-C34 | 1.363(3) |
| C26-C25 | 1.496(3) |
| C25-C24 | 1.381(3) |
| C32-C27 | 1.435(3) |
| C32-C31 | 1.436(3) |
| C11-C12 | 1.435(3) |
| C11-C13 | 1.416(3) |
| C11-C10 | 1.413(3) |
| C12-C7  | 1.435(3) |
| C12-C16 | 1.421(3) |
| C7-C8   | 1.373(3) |
| C17-C18 | 1.462(3) |
| C1-C6   | 1.505(3) |
| C1-C2   | 1.377(3) |
| C37-C38 | 1.467(3) |
| C27-C28 | 1.369(3) |
| C15-H15 | 0.9500   |
| C15-C16 | 1.361(3) |
| C15-C14 | 1.401(3) |



---

|          |          |
|----------|----------|
| C31-C36  | 1.413(3) |
| C31-C30  | 1.417(3) |
| C8-H8    | 0.9500   |
| C8-C9    | 1.405(3) |
| C24-H24  | 0.9500   |
| C24-C23  | 1.383(3) |
| C13-H13  | 0.9500   |
| C13-C14  | 1.361(3) |
| C34-H34  | 0.9500   |
| C34-C35  | 1.406(3) |
| C35-H35  | 0.9500   |
| C35-C36  | 1.359(3) |
| C38-H38  | 1.0000   |
| C38-C40  | 1.508(3) |
| C38-C39  | 1.502(3) |
| C23-H23  | 0.9500   |
| C23-C22  | 1.370(3) |
| C14-H14  | 0.9500   |
| C10-H10  | 0.9500   |
| C10-C9   | 1.353(3) |
| C28-H28  | 0.9500   |
| C28-C29  | 1.403(3) |
| C36-H36  | 0.9500   |
| C22-H22  | 0.9500   |
| C22-C21  | 1.382(3) |
| C2-H2    | 0.9500   |
| C2-C3    | 1.386(3) |
| C30-H30  | 0.9500   |
| C30-C29  | 1.360(3) |
| C18-H18  | 1.0000   |
| C18-C20  | 1.509(3) |
| C18-C19  | 1.496(3) |
| C21-H21  | 0.9500   |
| C29-H29  | 0.9500   |
| C9-H9    | 0.9500   |
| C40-H40A | 0.9900   |
| C40-H40B | 0.9900   |
| C40-C39  | 1.475(3) |
| C39-H39A | 0.9900   |
| C39-H39B | 0.9900   |
| C3-H3    | 0.9500   |
| C3-C4    | 1.377(4) |

---

---

|             |            |
|-------------|------------|
| C5-H5       | 0.9500     |
| C5-C4       | 1.384(3)   |
| C4-H4       | 0.9500     |
| C20-H20A    | 0.9900     |
| C20-H20B    | 0.9900     |
| C20-C19     | 1.459(4)   |
| C19-H19A    | 0.9900     |
| C19-H19B    | 0.9900     |
| C17-O2-C16  | 116.98(16) |
| C37-O5-C33  | 117.10(15) |
| C7-N1-H1    | 116.100    |
| C6-N1-H1    | 116.100    |
| C6-N1-C7    | 127.88(18) |
| C26-N4-H4A  | 116.500    |
| C26-N4-C27  | 127.07(19) |
| C27-N4-H4A  | 116.500    |
| C21-N3-C25  | 116.93(19) |
| C5-N2-C1    | 116.9(2)   |
| O5-C33-C32  | 120.13(18) |
| C34-C33-O5  | 116.7(2)   |
| C34-C33-C32 | 123.0(2)   |
| O4-C26-N4   | 125.2(2)   |
| O4-C26-C25  | 121.29(19) |
| N4-C26-C25  | 113.49(19) |
| N3-C25-C26  | 116.73(19) |
| N3-C25-C24  | 123.3(2)   |
| C24-C25-C26 | 120.0(2)   |
| C33-C32-C27 | 126.74(19) |
| C33-C32-C31 | 115.78(19) |
| C27-C32-C31 | 117.5(2)   |
| C13-C11-C12 | 120.1(2)   |
| C10-C11-C12 | 120.2(2)   |
| C10-C11-C13 | 119.7(2)   |
| C7 C12-C11  | 117.54(19) |
| C16 C12-C11 | 115.75(19) |
| C16 C12-C7  | 126.71(19) |
| N1-C7-C12   | 119.83(18) |
| C8-C7-N1    | 120.3(2)   |
| C8-C7-C12   | 119.9(2)   |
| O2-C17-C18  | 110.97(18) |
| O3-C17-O2   | 122.2(2)   |
| O3-C17-C18  | 126.8(2)   |

---

---

|             |            |
|-------------|------------|
| N2-C1-C6    | 117.3(2)   |
| N2-C1-C2    | 123.8(2)   |
| C2-C1-C6    | 118.8(2)   |
| O5-C37-C38  | 110.67(18) |
| O6-C37-O5   | 122.5(2)   |
| O6-C37-C38  | 126.8(2)   |
| N4-C27-C32  | 119.63(19) |
| C28-C27-N4  | 120.1(2)   |
| C28-C27-C32 | 120.2(2)   |
| C16-C15-H15 | 119.800    |
| C16-C15-C14 | 120.3(2)   |
| C14-C15-H15 | 119.800    |
| C36-C31-C32 | 120.1(2)   |
| C36-C31-C30 | 120.0(2)   |
| C30-C31-C32 | 119.9(2)   |
| O2-C16-C12  | 120.00(19) |
| C15-C16-O2  | 116.85(19) |
| C15-C16-C12 | 122.95(19) |
| C7-C8-H8    | 119.300    |
| C7-C8-C9    | 121.4(2)   |
| C9-C8-H8    | 119.300    |
| C25-C24-H24 | 120.800    |
| C25-C24-C23 | 118.5(2)   |
| C23-C24-H24 | 120.800    |
| C11-C13-H13 | 119.400    |
| C14-C13-C11 | 121.2(2)   |
| C14-C13-H13 | 119.400    |
| O1-C6-N1    | 125.8(2)   |
| O1-C6-C1    | 120.5(2)   |
| N1-C6-C1    | 113.64(19) |
| C33-C34-H34 | 120.000    |
| C33-C34-C35 | 120.0(2)   |
| C35-C34-H34 | 120.000    |
| C34-C35-H35 | 120.100    |
| C36-C35-C34 | 119.8(2)   |
| C36-C35-H35 | 120.100    |
| C37-C38-H38 | 117.000    |
| C37-C38-C40 | 116.79(19) |
| C37-C38-C39 | 117.44(19) |
| C40-C38-H38 | 117.000    |
| C39-C38-H38 | 117.000    |
| C39-C38-C40 | 58.70(15)  |

---

---

|               |           |
|---------------|-----------|
| C24-C23-H23   | 120.400   |
| C22-C23-C24   | 119.1(2)  |
| C22-C23-H23   | 120.400   |
| C15-C14-H14   | 120.200   |
| C13-C14-C15   | 119.7(2)  |
| C13-C14-H14   | 120.200   |
| C11-C10-H10   | 119.900   |
| C9-C10-C11    | 120.3(2)  |
| C9-C10-H10    | 119.900   |
| C27-C28-H28   | 119.200   |
| C27-C28-C29   | 121.5(2)  |
| C29-C28-H28   | 119.200   |
| C31-C36-H36   | 119.400   |
| C35-C36-C31   | 121.2(2)  |
| C35-C36-H36   | 119.400   |
| C23-C22-H22   | 120.700   |
| C23-C22-C21   | 118.6(2)  |
| C21-C22-H22   | 120.700   |
| C1-C2-H2      | 120.700   |
| C1-C2-C3      | 118.5(2)  |
| C3-C2-H2      | 120.700   |
| C31-C30-H30   | 119.700   |
| C29-C30-C31   | 120.6(2)  |
| C29-C30-H30   | 119.700   |
| C17-C18-H18   | 117.400   |
| C17-C18-C20   | 115.9(2)  |
| C17-C18-C19   | 117.5(2)  |
| C20-C18-H18   | 117.400   |
| C19-C18-H18   | 117.400   |
| C19-C18-C20   | 58.07(18) |
| N3-C21-C22    | 123.6(2)  |
| N3-C21-H21    | 118.200   |
| C22-C21-H21   | 118.200   |
| C28-C29-H29   | 119.900   |
| C30-C29-C28   | 120.3(2)  |
| C30-C29-H29   | 119.900   |
| C8-C9-H9      | 119.600   |
| C10-C9-C8     | 120.7(2)  |
| C10-C9-H9     | 119.600   |
| C38-C40-H40A  | 117.700   |
| C38-C40-H40B  | 117.700   |
| H40A-C40-H40B | 114.800   |

---

|               |           |
|---------------|-----------|
| C39-C40-C38   | 60.45(15) |
| C39-C40-H40A  | 117.700   |
| C39-C40-H40B  | 117.700   |
| C38-C39-H39A  | 117.700   |
| C38-C39-H39B  | 117.700   |
| C40-C39-C38   | 60.84(15) |
| C40-C39-H39A  | 117.700   |
| C40-C39-H39B  | 117.700   |
| H39A-C39-H39B | 114.800   |
| C2-C3-H3      | 120.800   |
| C4-C3-C2      | 118.4(2)  |
| C4-C3-H3      | 120.800   |
| N2-C5-H5      | 118.300   |
| N2-C5-C4      | 123.5(2)  |
| C4-C5-H5      | 118.300   |
| C3-C4-C5      | 118.8(2)  |
| C3-C4-H4      | 120.600   |
| C5-C4-H4      | 120.600   |
| C18-C20-H20A  | 117.700   |
| C18-C20-H20B  | 117.700   |
| H20A-C20-H20B | 114.800   |
| C19-C20-C18   | 60.52(17) |
| C19-C20-H20A  | 117.700   |
| C19-C20-H20B  | 117.700   |
| C18-C19-H19A  | 117.600   |
| C18-C19-H19B  | 117.600   |
| C20-C19-C18   | 61.41(18) |
| C20-C19-H19A  | 117.600   |
| C20-C19-H19B  | 117.600   |
| H19A-C19-H19B | 114.700   |

**Table S6.** Anisotropic displacement parameters ( $\text{\AA}^2 \times 10^3$ ) for **3aa-8**

| Atom | U11        | U22        | U33        | U12         | U13         | U23        |
|------|------------|------------|------------|-------------|-------------|------------|
| O2   | 0.0248(8)  | 0.0250(8)  | 0.0319(8)  | -0.0072(7)  | -0.0052(7)  | -0.0025(7) |
| O5   | 0.0278(9)  | 0.0282(8)  | 0.0264(8)  | -0.0085(7)  | -0.0029(7)  | -0.0074(7) |
| O4   | 0.0491(11) | 0.0242(9)  | 0.0324(9)  | -0.0062(8)  | -0.0139(8)  | -0.0047(7) |
| O3   | 0.0481(11) | 0.0242(9)  | 0.0395(10) | -0.0064(8)  | -0.0016(8)  | -0.0070(7) |
| O6   | 0.0536(11) | 0.0415(10) | 0.0433(10) | -0.0287(9)  | 0.0061(9)   | -0.0150(8) |
| O1   | 0.0767(14) | 0.0540(11) | 0.0395(10) | -0.0414(11) | -0.0229(10) | 0.0002(9)  |
| N1   | 0.0300(11) | 0.0279(10) | 0.029(1)   | -0.0109(8)  | -0.0087(8)  | -0.0040(8) |
| N4   | 0.0317(11) | 0.0252(10) | 0.0249(10) | -0.0053(8)  | -0.0085(8)  | -0.0062(8) |
| N3   | 0.0319(11) | 0.0265(10) | 0.0295(10) | -0.0063(9)  | -0.0070(9)  | -0.0056(8) |

---

|     |            |            |            |             |             |             |
|-----|------------|------------|------------|-------------|-------------|-------------|
| N2  | 0.0309(11) | 0.0386(11) | 0.0306(11) | -0.0122(9)  | -0.0040(9)  | -0.0047(9)  |
| C33 | 0.0283(12) | 0.0272(12) | 0.0245(11) | -0.0121(10) | -0.0018(10) | -0.0074(10) |
| C26 | 0.0263(12) | 0.0281(12) | 0.0253(11) | -0.0107(10) | -0.0074(10) | -0.0039(10) |
| C25 | 0.0233(12) | 0.0259(11) | 0.0268(11) | -0.0101(9)  | -0.0055(9)  | -0.0061(9)  |
| C32 | 0.0262(12) | 0.0240(11) | 0.0246(11) | -0.0114(10) | -0.0021(9)  | -0.0057(9)  |
| C11 | 0.0320(13) | 0.0196(11) | 0.0314(12) | -0.0052(10) | -0.0049(10) | -0.0047(10) |
| C12 | 0.0292(12) | 0.0192(11) | 0.0281(12) | -0.0033(9)  | -0.0055(10) | -0.0066(9)  |
| C7  | 0.0281(13) | 0.0199(11) | 0.0295(12) | -0.0061(9)  | -0.0037(10) | -0.0058(9)  |
| C17 | 0.0285(13) | 0.0308(13) | 0.0283(12) | -0.008(1)   | -0.0096(10) | -0.0061(10) |
| C1  | 0.0292(13) | 0.0268(12) | 0.0274(12) | -0.0046(10) | -0.0059(10) | -0.0079(10) |
| C37 | 0.0331(13) | 0.0252(12) | 0.0284(12) | -0.0092(10) | -0.0076(11) | -0.0003(10) |
| C27 | 0.0285(13) | 0.0275(12) | 0.0257(11) | -0.0102(10) | -0.0053(10) | -0.0077(10) |
| C15 | 0.0299(13) | 0.0272(12) | 0.0323(13) | -0.0036(10) | -0.0095(11) | -0.0093(10) |
| C31 | 0.0307(13) | 0.0298(12) | 0.0271(12) | -0.0138(10) | -0.0038(10) | -0.0078(10) |
| C16 | 0.0277(12) | 0.0205(11) | 0.0270(11) | -0.0057(9)  | -0.0031(10) | -0.0033(9)  |
| C8  | 0.0367(14) | 0.0296(12) | 0.0349(13) | -0.0112(11) | -0.0108(11) | -0.007(1)   |
| C24 | 0.0304(13) | 0.0299(12) | 0.0268(12) | -0.0084(10) | -0.0068(10) | -0.0047(10) |
| C13 | 0.0356(14) | 0.0267(12) | 0.0264(12) | -0.0038(10) | -0.0035(10) | -0.0037(10) |
| C6  | 0.0371(14) | 0.0269(12) | 0.0308(12) | -0.0085(11) | -0.0094(11) | -0.0072(10) |
| C34 | 0.0335(13) | 0.0302(12) | 0.0302(12) | -0.009(1)   | -0.0104(11) | -0.0031(10) |
| C35 | 0.0411(15) | 0.0357(13) | 0.0269(12) | -0.0148(12) | -0.0121(11) | -0.0033(11) |
| C38 | 0.0279(13) | 0.0287(12) | 0.0293(12) | -0.0074(10) | -0.0044(10) | -0.0076(10) |
| C23 | 0.0354(14) | 0.0398(14) | 0.0250(12) | -0.0114(11) | -0.0086(11) | -0.0064(11) |
| C14 | 0.0383(14) | 0.0316(13) | 0.0263(12) | -0.0033(11) | -0.0094(11) | -0.0042(10) |
| C10 | 0.0373(14) | 0.0258(12) | 0.0354(13) | -0.0121(11) | -0.0051(11) | -0.0018(10) |
| C28 | 0.0314(13) | 0.0358(13) | 0.0313(13) | -0.0061(11) | -0.0105(11) | -0.0074(11) |
| C36 | 0.0376(14) | 0.0330(13) | 0.0261(12) | -0.0150(11) | -0.0047(11) | -0.0093(10) |
| C22 | 0.0354(14) | 0.0348(13) | 0.0312(13) | -0.0083(11) | -0.0048(11) | -0.0135(11) |
| C2  | 0.0403(15) | 0.0371(14) | 0.0318(13) | -0.0101(11) | -0.0119(11) | -0.0076(11) |
| C30 | 0.0350(14) | 0.0343(13) | 0.0297(12) | -0.0084(11) | -0.0025(11) | -0.0142(11) |
| C18 | 0.0259(13) | 0.0283(12) | 0.0437(14) | -0.0079(10) | -0.0057(11) | -0.0067(11) |
| C21 | 0.0382(14) | 0.0289(12) | 0.0346(13) | -0.0042(11) | -0.0082(11) | -0.0111(11) |
| C29 | 0.0342(14) | 0.0348(13) | 0.0357(13) | -0.0016(11) | -0.0073(11) | -0.0123(11) |
| C9  | 0.0339(14) | 0.0318(13) | 0.0452(15) | -0.0158(11) | -0.0062(12) | -0.0060(11) |
| C40 | 0.0297(14) | 0.0394(14) | 0.0461(15) | -0.0089(11) | -0.0045(12) | -0.0155(12) |
| C39 | 0.0438(16) | 0.0402(15) | 0.0324(13) | -0.0110(12) | 0.0013(12)  | -0.0083(12) |
| C3  | 0.0535(17) | 0.0423(15) | 0.0308(13) | -0.0122(13) | -0.0135(12) | 0.0011(12)  |
| C5  | 0.0414(16) | 0.0516(16) | 0.0362(14) | -0.0240(13) | -0.0056(12) | -0.0017(13) |
| C4  | 0.0495(17) | 0.0447(15) | 0.0349(14) | -0.0212(14) | -0.0038(13) | 0.0035(12)  |
| C20 | 0.0289(15) | 0.0395(15) | 0.093(2)   | -0.0095(12) | -0.0150(15) | -0.0102(15) |
| C19 | 0.0538(18) | 0.0462(16) | 0.0552(18) | -0.0239(14) | 0.0101(15)  | -0.0124(14) |

---

## 6. Characterization data of silver carboxylates **2a-1–2d-16**

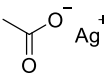 Silver(I) acetate (**2a-1**). Following the general procedure, **2a-1** was obtained as a gray solid (752 mg, 90%). <sup>1</sup>H NMR (400 MHz, Pyridine-*d*<sub>5</sub>) δ 2.45 (s, 3H). <sup>13</sup>C{<sup>1</sup>H} NMR (100 MHz, Pyridine-*d*<sub>5</sub>) δ 176.4, 24.6.

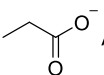 Silver(I) propionate (**2a-2**). Following the general procedure, **2a-2** was obtained as a gray solid (819 mg, 91%). <sup>1</sup>H NMR (400 MHz, DMSO-*d*<sub>6</sub>) δ 2.12 (q, *J* = 7.6 Hz, 2H), 1.01 (t, *J* = 7.6 Hz, 3H). <sup>13</sup>C{<sup>1</sup>H} NMR (100 MHz, DMSO-*d*<sub>6</sub>) δ 178.2, 30.2, 11.7.

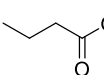 Silver(I) butyrate (**2a-3**). Following the general procedure, **2a-3** was obtained as a gray solid (873 mg, 90%). <sup>1</sup>H NMR (400 MHz, DMSO-*d*<sub>6</sub>) δ 2.10 (t, *J* = 7.4 Hz, 2H), 1.58-1.46 (m, 2H), 0.86 (t, *J* = 7.4 Hz, 3H). <sup>13</sup>C{<sup>1</sup>H} NMR (100 MHz, DMSO-*d*<sub>6</sub>) δ 177.4, 39.3, 20.2, 14.6.

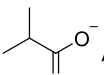 Silver(I) isobutyrate (**2a-4**). Following the general procedure, **2a-4** was obtained as a gray solid (922 mg, 95%). <sup>1</sup>H NMR (400 MHz, DMSO-*d*<sub>6</sub>) δ 2.39 (sep, *J* = 6.8 Hz, 1H), 1.05 (d, *J* = 6.8 Hz, 6H). <sup>13</sup>C{<sup>1</sup>H} NMR (100 MHz, DMSO-*d*<sub>6</sub>) δ 180.9, 36.2, 21.2.

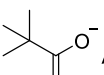 Silver(I) pivalate (**2a-5**). Following the general procedure, **2a-5** was obtained as a gray solid (1009 mg, 97%). <sup>1</sup>H NMR (400 MHz, DMSO-*d*<sub>6</sub>) δ 1.10 (s, 9H). <sup>13</sup>C{<sup>1</sup>H} NMR (100 MHz, DMSO-*d*<sub>6</sub>) δ 182.3, 39.6, 29.4.

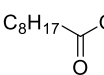 Silver(I) nonanoate (**2a-6**). Following the general procedure, **2a-6** was obtained as a white solid (2124 mg, 80%). <sup>1</sup>H NMR (400 MHz, Pyridine-*d*<sub>5</sub>) δ 2.82 (t, *J* = 7.6 Hz, 2H), 2.12-2.04 (m, 2H), 1.57-1.47 (m, 2H), 1.35-1.27 (m, 2H), 1.25-1.11 (m, 6H), 0.79 (t, *J* = 6.8 Hz, 3H). <sup>13</sup>C{<sup>1</sup>H} NMR (100 MHz, Pyridine-*d*<sub>5</sub>) δ 179.0, 38.5, 32.0, 30.4, 30.0, 29.6, 28.0, 22.8, 14.2.

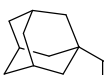 Silver(I) adamantane-1-carboxylate (**2a-7**). Following the general procedure, **2a-7** was obtained as a gray solid (1148 mg, 80%). <sup>1</sup>H NMR (400 MHz, Pyridine-*d*<sub>5</sub>) δ 2.49-2.43 (m, 6H), 2.03 (s, 3H), 1.81 (s, 1H), 1.78 (s, 2H), 1.73 (s, 2H), 1.70 (s, 1H). <sup>13</sup>C{<sup>1</sup>H} NMR (100 MHz, Pyridine-*d*<sub>5</sub>) δ 183.2, 42.1, 41.6, 37.5, 39.3.

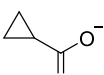 Silver(I) cyclopropanecarboxylate (**2a-8**). Following the general procedure, **2a-8** was obtained as a gray solid (682 mg, 71%). <sup>1</sup>H NMR (400 MHz, DMSO-*d*<sub>6</sub>) δ 1.51-1.38 (m, 1H), 0.69-0.54 (m, 4H). <sup>13</sup>C{<sup>1</sup>H} NMR (100 MHz, DMSO-*d*<sub>6</sub>) δ 178.5, 15.6, 7.3.

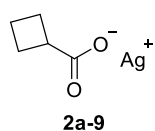

Silver(I) cyclobutanecarboxylate (**2a-9**). Following the general procedure, **2a-9** was obtained as a gray solid (618 mg, 60%).  $^1\text{H}$  NMR (400 MHz, DMSO- $d_6$ )  $\delta$  3.03-2.91 (m, 1H), 2.16-2.00 (m, 4H), 1.88-1.68 (m, 2H).  $^{13}\text{C}\{^1\text{H}\}$  NMR (100 MHz, DMSO- $d_6$ )  $\delta$  179.4, 40.8, 26.7, 18.2.

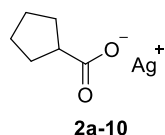

Silver(I) cyclopentanecarboxylate (**2a-10**). Following the general procedure, **2a-10** was obtained as a gray solid (880 mg, 80%).  $^1\text{H}$  NMR (400 MHz, DMSO- $d_6$ )  $\delta$  2.63-2.53 (m, 1H), 1.80-1.36 (m, 8H).  $^{13}\text{C}\{^1\text{H}\}$  NMR (100 MHz, DMSO- $d_6$ )  $\delta$  180.3, 46.5, 31.2, 25.9.

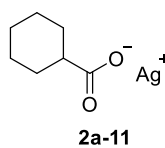

Silver(I) cyclohexanecarboxylate (**2a-11**). Following the general procedure, **2a-11** was obtained as a gray solid (995 mg, 85%).  $^1\text{H}$  NMR (400 MHz, DMSO- $d_6$ )  $\delta$  2.14-2.04 (m, 1H), 1.78-1.74 (m, 2H), 1.70-1.60 (m, 2H), 1.59-1.52 (m, 1H), 1.35-1.13 (m, 5H).  $^{13}\text{C}\{^1\text{H}\}$  NMR (100 MHz, DMSO- $d_6$ )  $\delta$  179.8, 45.5, 30.9, 26.4, 26.1.

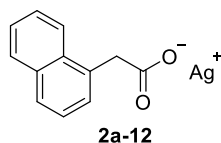

Silver(I) 2-(naphthalen-1-yl)acetate (**2a-12**). Following the general procedure, **2a-12** was obtained as a gray solid (1241 mg, 85%).  $^1\text{H}$  NMR (400 MHz, DMSO- $d_6$ )  $\delta$  8.12-7.99 (m, 1H), 7.94-7.83 (m, 1H), 7.75 (d,  $J = 8.0$  Hz, 1H), 7.51-7.43 (m, 2H), 7.43-7.31 (m, 2H), 3.91 (s, 2H).  $^{13}\text{C}\{^1\text{H}\}$  NMR (100 MHz, DMSO- $d_6$ )  $\delta$  175.4, 135.3, 133.8, 132.7, 128.6, 127.9, 126.8, 126.1, 125.9, 125.8, 125.2, 42.3.

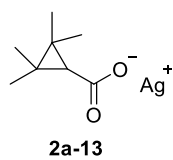

Silver(I) 2,2,3,3-tetramethylcyclopropane-1-carboxylate (**2a-13**). Following the general procedure, **2a-13** was obtained as a gray solid (930 mg, 75%).  $^1\text{H}$  NMR (400 MHz, DMSO- $d_6$ )  $\delta$  1.19 (s, 6H), 1.13 (s, 1H), 1.08 (s, 6H).  $^{13}\text{C}\{^1\text{H}\}$  NMR (100 MHz, DMSO- $d_6$ )  $\delta$  176.7, 26.3, 24.4, 17.9.

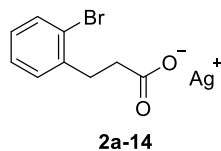

Silver(I) 3-(2-bromophenyl)propanoate (**2a-14**). Following the general procedure, **2a-14** was obtained as a gray solid (1598 mg, 80%).  $^1\text{H}$  NMR (400 MHz, Pyridine- $d_5$ )  $\delta$  7.57-7.49 (m, 2H), 7.14 (t,  $J = 7.2$  Hz, 1H), 6.99 (t,  $J = 7.6$  Hz, 1H), 3.54 (t,  $J = 8.0$  Hz, 2H), 3.11 (t,  $J = 8.0$  Hz, 2H).  $^{13}\text{C}\{^1\text{H}\}$  NMR (100 MHz, Pyridine- $d_5$ )  $\delta$  176.3, 141.6, 131.3, 129.5, 126.4, 126.2, 123.4, 36.8, 33.0.

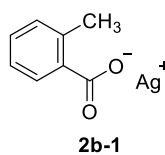

Silver(I) 2-methylbenzoate (**2b-1**). Following the general procedure, **2b-1** was obtained as a gray solid (1150 mg, 95%).  $^1\text{H}$  NMR (400 MHz, DMSO- $d_6$ )  $\delta$  7.65 (d,  $J = 8.0$  Hz, 1H), 7.24-7.19 (m, 1H), 7.18-7.08 (m, 2H), 2.49 (s, 3H).  $^{13}\text{C}\{^1\text{H}\}$  NMR (100 MHz, DMSO- $d_6$ )  $\delta$  173.2, 138.8,



136.9, 130.9, 129.7, 129.0, 125.5, 21.8.

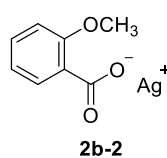

Silver(I) 2-methoxybenzoate (**2b-2**). Following the general procedure, **2b-2** was obtained as a gray solid (1226 mg, 95%).  $^1\text{H}$  NMR (400 MHz,  $\text{DMSO-}d_6$ )  $\delta$  7.43 (dd,  $J = 7.6, 2.0$  Hz, 1H), 7.31-7.25 (m, 1H), 6.98 (dd,  $J = 8.4, 1.2$  Hz, 1H), 6.89 (dt,  $J = 7.6, 1.2$  Hz, 1H), 3.73 (s, 3H).  $^{13}\text{C}\{^1\text{H}\}$  NMR (100 MHz,  $\text{DMSO-}d_6$ )  $\delta$  171.8, 156.7, 129.9, 129.7, 129.4, 120.2, 112.2, 55.8.

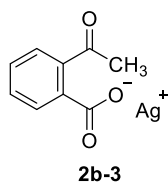

Silver(I) 2-acetylbenzoate (**2b-3**). Following the general procedure, **2b-3** was obtained as a gray solid (1283 mg, 95%).  $^1\text{H}$  NMR (400 MHz,  $\text{DMSO-}d_6$ )  $\delta$  8.03 (d,  $J = 8.4$  Hz, 2H), 7.95 (d,  $J = 8.4$  Hz, 2H), 2.59 (s, 3H).  $^{13}\text{C}\{^1\text{H}\}$  NMR (100 MHz,  $\text{DMSO-}d_6$ )  $\delta$  198.3, 169.7, 141.8, 138.2, 130.0, 128.2, 27.4.

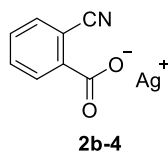

Silver(I) 2-cyanobenzoate (**2b-4**). Following the general procedure, **2b-4** was obtained as a gray solid (1201 mg, 95%).  $^1\text{H}$  NMR (400 MHz,  $\text{DMSO-}d_6$ )  $\delta$  8.02 (dd,  $J = 7.6, 1.2$  Hz, 1H), 7.77 (dd,  $J = 7.6, 1.2$  Hz, 1H), 7.66 (dt,  $J = 7.6, 1.2$  Hz, 1H), 7.55 (dd,  $J = 7.6, 1.2$  Hz, 1H).  $^{13}\text{C}\{^1\text{H}\}$  NMR (100 MHz,  $\text{DMSO-}d_6$ )  $\delta$  168.2, 141.5, 134.3, 132.7, 131.0, 130.4, 119.7, 112.1.

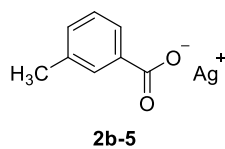

Silver(I) 3-methylbenzoate (**2b-5**). Following the general procedure, **2b-5** was obtained as a gray solid (1138 mg, 94%).  $^1\text{H}$  NMR (400 MHz,  $\text{DMSO-}d_6$ )  $\delta$  7.78 (s, 1H), 7.75 (d,  $J = 6.4$  Hz, 1H), 7.29-7.21 (m, 2H), 2.34 (s, 3H).  $^{13}\text{C}\{^1\text{H}\}$  NMR (100 MHz,  $\text{DMSO-}d_6$ )  $\delta$  170.8, 137.21, 137.19, 131.3, 130.7, 128.1, 127.2, 21.5.

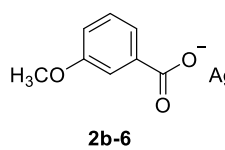

Silver(I) 3-methoxybenzoate (**2b-6**). Following the general procedure, **2b-6** was obtained as a gray solid (1226 mg, 95%).  $^1\text{H}$  NMR (400 MHz,  $\text{DMSO-}d_6$ )  $\delta$  7.60-7.40 (m, 2H), 7.32-7.23 (m, 1H), 7.05-6.92 (m, 1H), 3.77 (s, 3H).  $^{13}\text{C}\{^1\text{H}\}$  NMR (100 MHz,  $\text{DMSO-}d_6$ )  $\delta$  170.4, 159.3, 136.2, 129.3, 122.4, 116.6, 114.9, 55.5.

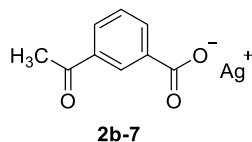

Silver(I) 3-acetylbenzoate (**2b-7**). Following the general procedure, **2b-7** was obtained as a gray solid (1242 mg, 92%).  $^1\text{H}$  NMR (400 MHz,  $\text{DMSO-}d_6$ )  $\delta$  8.51 (s, 1H), 8.18 (d,  $J = 7.6$  Hz, 1H), 8.02 (d,  $J = 7.6$  Hz, 1H), 7.54 (t,  $J = 7.6$  Hz, 1H), 2.60 (s, 3H).  $^{13}\text{C}\{^1\text{H}\}$  NMR (100 MHz,  $\text{DMSO-}d_6$ )  $\delta$  198.3, 169.7, 137.9, 137.0, 134.4, 130.3, 129.5, 128.7, 27.3.

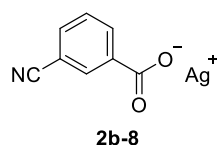

Silver(I) 3-cyanobenzoate (**2b-8**). Following the general procedure, **2b-8** was obtained as a gray solid (1213 mg, 96%).  $^1\text{H}$  NMR (400 MHz, DMSO- $d_6$ )  $\delta$  8.24-8.18 (m, 2H), 7.90-7.85 (m, 1H), 7.60 (t,  $J$  = 8.0 Hz, 1H).  $^{13}\text{C}\{^1\text{H}\}$  NMR (100 MHz, DMSO- $d_6$ )  $\delta$  168.5, 139.0, 134.4, 133.9, 133.2, 129.7, 129.3, 111.3.

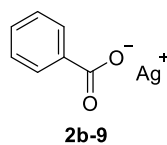

Silver(I) benzoate (**2b-9**). Following the general procedure, **2b-9** was obtained as a gray solid (1053 mg, 93%).  $^1\text{H}$  NMR (400 MHz, Pyridine- $d_5$ )  $\delta$  8.85 (d,  $J$  = 8.0 Hz, 2H), 7.49-7.38 (m, 3H).  $^{13}\text{C}\{^1\text{H}\}$  NMR (100 MHz, Pyridine- $d_5$ )  $\delta$  171.8, 140.2, 130.6, 129.5, 127.8.

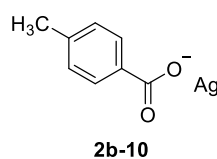

Silver(I) 4-methylbenzoate (**2b-10**). Following the general procedure, **2b-10** was obtained as a gray solid (1150 mg, 95%).  $^1\text{H}$  NMR (400 MHz, DMSO- $d_6$ )  $\delta$  7.85 (d,  $J$  = 8.0 Hz, 2H), 7.17 (d,  $J$  = 8.0 Hz, 2H), 2.33 (s, 3H).  $^{13}\text{C}\{^1\text{H}\}$  NMR (100 MHz, DMSO- $d_6$ )  $\delta$  170.7, 140.3, 134.5, 130.1, 128.8, 21.5.

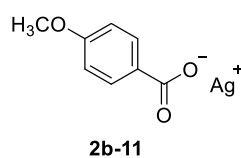

Silver(I) 4-methoxybenzoate (**2b-11**). Following the general procedure, **2b-11** was obtained as a gray solid (1225 mg, 95%).  $^1\text{H}$  NMR (400 MHz, DMSO- $d_6$ )  $\delta$  7.89 (d,  $J$  = 9.0 Hz, 2H), 6.89 (d,  $J$  = 9.0 Hz, 2H), 3.78 (s, 3H).  $^{13}\text{C}\{^1\text{H}\}$  NMR (100 MHz, DMSO- $d_6$ )  $\delta$  170.5, 161.4, 131.8, 129.7, 113.4, 55.6.

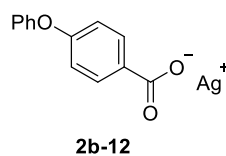

Silver(I) 4-phenoxybenzoate (**2b-12**). Following the general procedure, **2b-12** was obtained as a gray solid (1225 mg, 95%).  $^1\text{H}$  NMR (400 MHz, DMSO- $d_6$ )  $\delta$  7.96 (d,  $J$  = 8.8 Hz, 2H), 7.42 (dd,  $J$  = 8.8, 7.2 Hz, 2H), 7.18 (t,  $J$  = 7.2 Hz, 1H), 7.07 (d,  $J$  = 7.2 Hz, 2H), 6.95 (d,  $J$  = 8.8 Hz, 2H).  $^{13}\text{C}\{^1\text{H}\}$  NMR (100 MHz, DMSO- $d_6$ )  $\delta$  170.0, 159.2, 156.4, 132.2, 132.1, 130.6, 124.4, 119.8, 117.4.

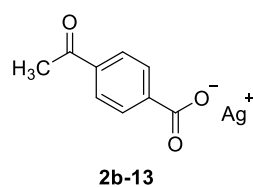

Silver(I) 4-acetylbenzoate (**2b-13**). Following the general procedure, **2b-13** was obtained as a gray solid (1245 mg, 92%).  $^1\text{H}$  NMR (400 MHz, DMSO- $d_6$ )  $\delta$  8.04 (d,  $J$  = 8.2 Hz, 2H), 7.98 (d,  $J$  = 8.2 Hz, 2H), 2.60 (s, 3H).  $^{13}\text{C}\{^1\text{H}\}$  NMR (100 MHz, DMSO- $d_6$ )  $\delta$  198.3, 168.8, 139.6, 138.9, 130.0, 128.4, 27.4.

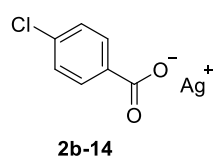

Silver(I) 4-chlorobenzoate (**2b-14**). Following the general procedure, **2b-14** was obtained as a gray solid (1179 mg, 90%).  $^1\text{H}$  NMR (400 MHz, DMSO- $d_6$ )  $\delta$  7.95 (d,  $J$  = 8.4 Hz, 2H), 7.45 (d,  $J$  = 8.4 Hz, 2H).  $^{13}\text{C}\{^1\text{H}\}$  NMR (100 MHz, DMSO- $d_6$ )  $\delta$  169.1, 136.0, 135.1, 131.8, 128.5.

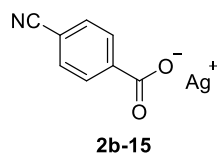

Silver(I) 4-cyanobenzoate (**2b-15**). Following the general procedure, **2b-15** was obtained as a gray solid (1175 mg, 93%).  $^1\text{H}$  NMR (400 MHz,  $\text{DMSO-}d_6$ )  $\delta$  8.06 (d,  $J = 8.0$  Hz, 2H), 7.84 (d,  $J = 8.0$  Hz, 2H).  $^{13}\text{C}\{^1\text{H}\}$  NMR (100 MHz,  $\text{DMSO-}d_6$ )  $\delta$  169.0, 142.0, 132.4, 130.5, 119.3, 112.8.

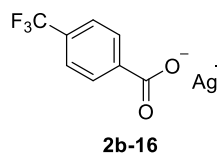

Silver(I) 4-(trifluoromethyl)benzoate (**2b-16**). Following the general procedure, **2b-16** was obtained as a gray solid (1406 mg, 95%).  $^1\text{H}$  NMR (400 MHz,  $\text{DMSO-}d_6$ )  $\delta$  8.13 (d,  $J = 8.0$  Hz, 2H), 7.73 (d,  $J = 8.0$  Hz, 2H).  $^{13}\text{C}\{^1\text{H}\}$  NMR (100 MHz,  $\text{DMSO-}d_6$ )  $\delta$  169.3, 141.4, 130.7 (q,  $J_{\text{C-F}} = 31.3$  Hz), 130.6, 125.2 (q,  $J_{\text{C-F}} = 14.0$  Hz), 124.7 (q,  $J_{\text{C-F}} = 270.6$  Hz).  $^{19}\text{F}$  NMR (376 MHz,  $\text{DMSO-}d_6$ )  $\delta$  -61.1.

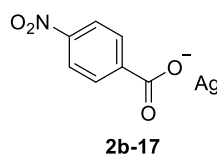

Silver(I) 4-nitrobenzoate (**2b-17**). Following the general procedure, **2b-17** was obtained as a gray solid (1256 mg, 92%).  $^1\text{H}$  NMR (400 MHz,  $\text{DMSO-}d_6$ )  $\delta$  8.21 (d,  $J = 8.8$  Hz, 2H), 8.12 (d,  $J = 8.8$  Hz, 2H).  $^{13}\text{C}\{^1\text{H}\}$  NMR (100 MHz,  $\text{DMSO-}d_6$ )  $\delta$  168.6, 148.8, 144.2, 130.9, 123.4.

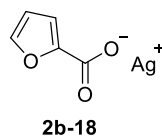

Silver(I) furan-2-carboxylate (**2b-18**). Following the general procedure, **2b-18** was obtained as a gray solid (872 mg, 80%).  $^1\text{H}$  NMR (400 MHz,  $\text{DMSO-}d_6$ )  $\delta$  7.65 (dd,  $J = 1.6, 0.8$  Hz, 1H), 6.81 (dd,  $J = 3.2, 0.8$  Hz, 1H), 6.48 (dd,  $J = 3.2, 1.6$  Hz, 1H).  $^{13}\text{C}\{^1\text{H}\}$  NMR (100 MHz,  $\text{DMSO-}d_6$ )  $\delta$  163.2, 151.7, 144.2, 113.8, 111.6.

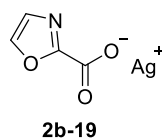

Silver(I) oxazole-2-carboxylate (**2b-19**). Following the general procedure, **2b-19** was obtained as a gray solid (876 mg, 80%).  $^1\text{H}$  NMR (400 MHz,  $\text{Pyridine-}d_5$ )  $\delta$  7.97 (s, 1H), 7.24 (s, 1H).  $^{13}\text{C}\{^1\text{H}\}$  NMR (100 MHz,  $\text{Pyridine-}d_5$ )  $\delta$  162.9, 159.6, 139.9, 127.5.

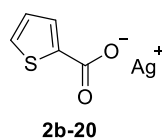

Silver(I) thiophene-2-carboxylate (**2b-20**). Following the general procedure, **2b-20** was obtained as a gray solid (936 mg, 80%).  $^1\text{H}$  NMR (400 MHz,  $\text{DMSO-}d_6$ )  $\delta$  7.58 (dd,  $J = 4.8, 1.2$  Hz, 1H), 7.47 (dd,  $J = 3.6, 1.2$  Hz, 1H), 7.05 (dd,  $J = 4.8, 3.6$  Hz, 1H).  $^{13}\text{C}\{^1\text{H}\}$  NMR (100 MHz,  $\text{DMSO-}d_6$ )  $\delta$  166.2, 143.0, 130.6, 130.3, 127.9.

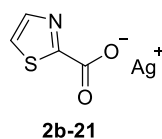

Silver(I) thiazole-2-carboxylate (**2b-21**). Following the general procedure, **2b-21** was obtained as a gray solid (940 mg, 80%).  $^1\text{H}$  NMR (400 MHz,  $\text{DMSO-}d_6$ )  $\delta$  7.91 (d,  $J = 3.2$  Hz, 1H), 7.88 (d,  $J = 3.2$  Hz, 1H).  $^{13}\text{C}\{^1\text{H}\}$  NMR (100 MHz,  $\text{DMSO-}d_6$ )  $\delta$  172.4, 160.8, 143.0, 125.5.

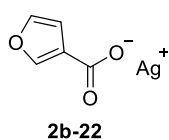

Silver(I) furan-3-carboxylate (**2b-22**). Following the general procedure, **2b-22** was obtained as a gray solid (894 mg, 83%). <sup>1</sup>H NMR (400 MHz, DMSO-*d*<sub>6</sub>) δ 7.94 (dd, *J* = 1.6, 0.8 Hz, 1H), 7.60 (t, *J* = 1.6 Hz, 1H), 6.60 (dd, *J* = 1.6, 0.8 Hz, 1H). <sup>13</sup>C{<sup>1</sup>H} NMR (100 MHz, DMSO-*d*<sub>6</sub>) δ 167.3, 146.1, 143.6, 125.5, 111.7.

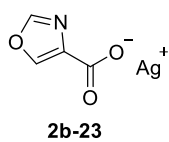

Silver(I) oxazole-4-carboxylate (**2b-23**). Following the general procedure, **2b-23** was obtained as a gray solid (876 mg, 80%). <sup>1</sup>H NMR (400 MHz, DMSO-*d*<sub>6</sub>) δ 8.52 (d, *J* = 0.8 Hz, 1H), 8.45 (d, *J* = 0.8 Hz, 1H). <sup>13</sup>C{<sup>1</sup>H} NMR (100 MHz, DMSO-*d*<sub>6</sub>) δ 163.1, 152.7, 143.5, 136.3.

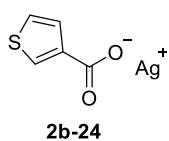

Silver(I) thiophene-3-carboxylate (**2b-24**). Following the general procedure, **2b-24** was obtained as a gray solid (937 mg, 80%). <sup>1</sup>H NMR (400 MHz, DMSO-*d*<sub>6</sub>) δ 7.91 (dd, *J* = 3.2, 0.8 Hz, 1H), 7.44 (dd, *J* = 4.8, 3.2 Hz, 1H), 7.37 (dd, *J* = 4.8, 0.8 Hz, 1H). <sup>13</sup>C{<sup>1</sup>H} NMR (100 MHz, DMSO-*d*<sub>6</sub>) δ 167.3, 141.3, 129.9, 129.5, 125.8.

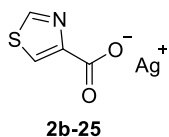

Silver(I) thiazole-4-carboxylate (**2b-25**). Following the general procedure, **2b-25** was obtained as a gray solid (942 mg, 80%). <sup>1</sup>H NMR (400 MHz, DMSO-*d*<sub>6</sub>) δ 9.20 (d, *J* = 2.0 Hz, 1H), 8.39 (d, *J* = 2.0 Hz, 1H). <sup>13</sup>C{<sup>1</sup>H} NMR (100 MHz, DMSO-*d*<sub>6</sub>) δ 163.6, 156.7, 150.8, 127.0.

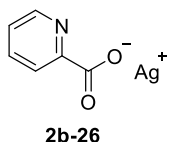

Silver(I) picolinate (**2b-26**). Following the general procedure, **2b-26** was obtained as a gray solid (1031 mg, 91%). <sup>1</sup>H NMR (400 MHz, DMSO-*d*<sub>6</sub>) δ 8.69 (d, *J* = 4.4 Hz, 1H), 8.06 (d, *J* = 7.6 Hz, 1H), 7.99 (dt, *J* = 7.6, 1.6 Hz, 1H), 7.66-7.59 (m, 1H). <sup>13</sup>C{<sup>1</sup>H} NMR (100 MHz, DMSO-*d*<sub>6</sub>) δ 166.6, 150.0, 149.3, 138.1, 127.4, 125.1.

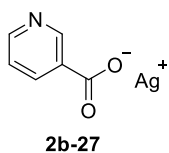

Silver(I) nicotinate (**2b-27**). Following the general procedure, **2b-27** was obtained as a gray solid (912 mg, 80%). <sup>1</sup>H NMR (400 MHz, Pyridine-*d*<sub>5</sub>) δ 10.10 (d, *J* = 2.0 Hz, 1H), 8.91 (dt, *J* = 7.6, 2.0 Hz, 1H), 8.72 (dd, *J* = 4.8, 2.0 Hz, 1H), 7.27 (dd, *J* = 7.6, 4.8 Hz, 1H). <sup>13</sup>C{<sup>1</sup>H} NMR (100 MHz, Pyridine-*d*<sub>5</sub>) δ 170.1, 152.4, 150.4, 137.5, 123.0.

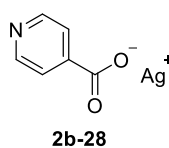

Silver(I) isonicotinate (**2b-28**). Following the general procedure, **2b-28** was obtained as a gray solid (1005 mg, 88%). <sup>1</sup>H NMR (400 MHz, Pyridine-*d*<sub>5</sub>) δ 8.85 (dt, *J* = 4.0, 2.0 Hz, 2H), 8.52 (dt, *J* = 4.0, 2.0 Hz, 2H). <sup>13</sup>C{<sup>1</sup>H} NMR (100 MHz, Pyridine-*d*<sub>5</sub>) δ 169.9, 150.2, 147.8, 124.7.

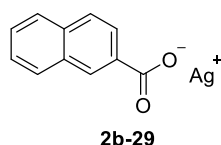

Silver(I) 2-naphthoate (**2b-29**). Following the general procedure, **2b-29** was obtained as a gray solid (1181 mg, 85%). <sup>1</sup>H NMR (400 MHz, DMSO-*d*<sub>6</sub>) δ 8.55 (s, 1H), 8.07 (dd, *J* = 8.4, 1.4 Hz, 1H), 8.05-8.00 (m, 1H), 7.96-7.92 (m, 1H), 7.90 (d, *J* = 8.8 Hz, 1H), 7.60-7.50 (m, 2H). <sup>13</sup>C{<sup>1</sup>H} NMR (100 MHz, DMSO-*d*<sub>6</sub>) δ 170.5, 134.5, 134.3, 132.9, 130.0, 129.4, 127.9, 127.6, 127.5, 127.3, 126.6.

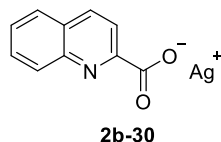

Silver(I) quinoline-2-carboxylate (**2b-30**). Following the general procedure, **2b-30** was obtained as a gray solid (1173 mg, 84%). <sup>1</sup>H NMR (400 MHz, Pyridine-*d*<sub>5</sub>) δ 9.03 (d, *J* = 8.8 Hz, 1H), 8.64 (d, *J* = 8.4 Hz, 1H), 8.32 (d, *J* = 8.4 Hz, 1H), 7.86 (d, *J* = 8.0 Hz, 1H), 7.70-7.64 (m, 1H), 7.53-7.47 (m, 1H). <sup>13</sup>C{<sup>1</sup>H} NMR (100 MHz, Pyridine-*d*<sub>5</sub>) δ 168.2, 156.6, 146.1, 137.8, 130.4, 130.3, 129.3, 128.1, 127.6, 123.0.

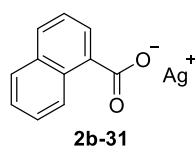

Silver(I) 1-naphthoate (**2b-31**). Following the general procedure, **2b-31** was obtained as a gray solid (1188 mg, 86%). <sup>1</sup>H NMR (400 MHz, DMSO-*d*<sub>6</sub>) δ 8.97-8.88 (m, 1H), 7.98-7.87 (m, 3H), 7.55-7.44 (m, 3H). <sup>13</sup>C{<sup>1</sup>H} NMR (100 MHz, DMSO-*d*<sub>6</sub>) δ 172.7, 136.9, 133.9, 131.2, 129.7, 128.4, 127.8, 127.7, 126.3, 125.9, 125.5.

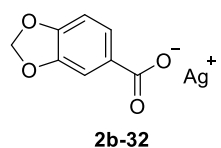

Silver(I) benzo[d][1,3]dioxole-5-carboxylate (**2b-32**). Following the general procedure, **2b-32** was obtained as a gray solid (1292 mg, 95%). <sup>1</sup>H NMR (400 MHz, DMSO-*d*<sub>6</sub>) δ 7.54 (dd, *J* = 8.0, 1.6 Hz, 1H), 7.38 (d, *J* = 1.6 Hz, 1H), 6.89 (d, *J* = 8.0 Hz, 1H), 6.05 (s, 2H). <sup>13</sup>C{<sup>1</sup>H} NMR (100 MHz, DMSO-*d*<sub>6</sub>) δ 169.7, 149.6, 147.3, 131.1, 124.8, 109.9, 107.9, 101.7.

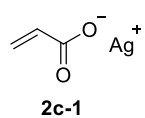

Silver(I) acrylate (**2c-1**). Following the general procedure, **2c-1** was obtained as a gray solid (712 mg, 80%). <sup>1</sup>H NMR (400 MHz, DMSO-*d*<sub>6</sub>) δ 6.15 (dd, *J* = 17.2, 10.0 Hz, 1H), 5.97 (dd, *J* = 17.2, 2.8 Hz, 1H), 5.52 (dd, *J* = 10.0, 2.8, 1H). <sup>13</sup>C{<sup>1</sup>H} NMR (100 MHz, DMSO-*d*<sub>6</sub>) δ 170.7, 135.7, 125.4.

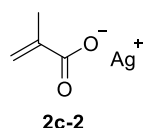

Silver(I) methacrylate (**2c-2**). Following the general procedure, **2c-2** was obtained as a gray solid (772 mg, 81%). <sup>1</sup>H NMR (400 MHz, DMSO-*d*<sub>6</sub>) δ 5.76 (dd, *J* = 7.2, 4.8, 1H), 5.26-5.22 (m, 1H), 1.86 (s, 3H). <sup>13</sup>C{<sup>1</sup>H} NMR (100 MHz, DMSO-*d*<sub>6</sub>) δ 172.0, 143.6, 120.6, 20.8.

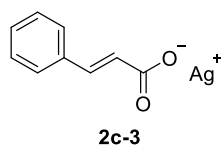

Silver(I) cinnamate (**2c-3**). Following the general procedure, **2c-3** was obtained as a gray solid (1143 mg, 90%). <sup>1</sup>H NMR (400 MHz, Pyridine-*d*<sub>5</sub>) δ 8.17 (d, *J* = 16.0 Hz, 1H), 7.59 (d, *J* = 7.2 Hz, 2H), 7.43 (d, *J* = 16.0 Hz, 1H), 7.29-7.18 (m, 3H). <sup>13</sup>C{<sup>1</sup>H} NMR (100 MHz, Pyridine-*d*<sub>5</sub>) δ 172.6, 138.1, 137.5, 129.3, 128.9, 128.3, 127.5.

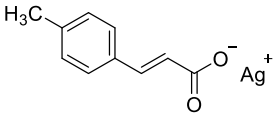
 Silver(I) 3-(*p*-tolyl)acrylate (**2c-4**). Following the general procedure, **2c-4** was obtained as a gray solid (1206 mg, 90%). <sup>1</sup>H NMR (400 MHz, Pyridine-*d*<sub>5</sub>) δ 8.17 (d, *J* = 15.6 Hz, 1H), 7.52 (d, *J* = 8.0 Hz, 2H), 7.39 (d, *J* = 15.6 Hz, 1H), 7.07 (d, *J* = 8.0 Hz, 2H), 2.15 (s, 3H). <sup>13</sup>C{<sup>1</sup>H} NMR (100 MHz, Pyridine-*d*<sub>5</sub>) δ 172.5, 138.5, 138.2, 134.6, 129.6, 127.63, 127.59, 21.0.

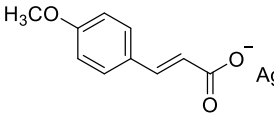
 Silver(I) 3-(4-methoxyphenyl)acrylate (**2c-5**). Following the general procedure, **2c-5** was obtained as a gray solid (1278 mg, 90%). <sup>1</sup>H NMR (400 MHz, DMSO-*d*<sub>6</sub>) δ 7.60 (d, *J* = 8.8 Hz, 2H), 7.46 (d, *J* = 16.0 Hz, 1H), 7.00 (d, *J* = 8.8 Hz, 2H), 6.38 (d, *J* = 16.0 Hz, 1H), 3.79 (s, 3H). <sup>13</sup>C{<sup>1</sup>H} NMR (100 MHz, DMSO-*d*<sub>6</sub>) δ 168.9, 161.1, 142.8, 130.1, 127.7, 118.8, 114.8, 55.7.

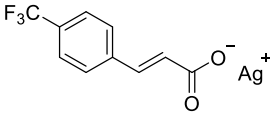
 Silver(I) 3-(4-(trifluoromethyl)phenyl)acrylate (**2c-6**). Following the general procedure, **2c-6** was obtained as a gray solid (1450 mg, 90%). <sup>1</sup>H NMR (400 MHz, Pyridine-*d*<sub>5</sub>) δ 8.09 (d, *J* = 16.0 Hz, 1H), 7.65 (d, *J* = 8.0 Hz, 2H), 7.55 (d, *J* = 8.0 Hz, 2H), 7.47 (d, *J* = 16.0 Hz, 1H). <sup>13</sup>C{<sup>1</sup>H} NMR (100 MHz, Pyridine-*d*<sub>5</sub>) δ 171.5, 141.2, 136.9, 131.3, 129.3 (q, *J*<sub>C-F</sub> = 31.8 Hz), 127.9, 125.7 (q, *J*<sub>C-F</sub> = 3.8 Hz), 124.8 (q, *J*<sub>C-F</sub> = 270.2 Hz). <sup>19</sup>F NMR (376 MHz, Pyridine-*d*<sub>5</sub>) δ -61.9.

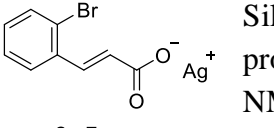
 Silver(I) 3-(2-bromophenyl)acrylate (**2c-7**). Following the general procedure, **2c-7** was obtained as a gray solid (1560 mg, 92%). <sup>1</sup>H NMR (400 MHz, Pyridine-*d*<sub>5</sub>) δ 8.49 (d, *J* = 15.6 Hz, 1H), 7.75 (dd, *J* = 8.0, 1.6 Hz, 1H), 7.55 (dd, *J* = 8.0, 1.2 Hz, 1H), 7.28 (d, *J* = 15.6 Hz, 1H), 7.19 (t, *J* = 7.6 Hz, 1H), 7.06 (dt, *J* = 7.6, 1.6 Hz, 1H). <sup>13</sup>C{<sup>1</sup>H} NMR (100 MHz, Pyridine-*d*<sub>5</sub>) δ 171.2, 137.5, 136.6, 133.3, 130.4, 130.0, 128.00, 127.98, 124.7.

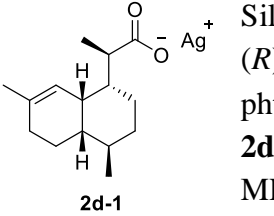
 Silver(I) (*R*)-2-((1*R*,4*R*,4*aS*,8*aS*)-4,7-dimethyl-1,2,3,4,4*a*,5,6,8*a*-octahydrophthalen-1-yl)propanoate (**2d-1**). Following the general procedure, **2d-1** was obtained as a gray solid (1368 mg, 80%). <sup>1</sup>H NMR (400 MHz, DMSO-*d*<sub>6</sub>) δ 5.17 (s, 1H), 2.45-2.30 (m, 2H), 1.92-1.71 (m, 3H), 1.60 (s, 3H), 1.54-1.43 (m, 3H), 1.40-1.29 (m, 2H), 1.21-1.14 (m, 1H), 1.02-0.95 (m, 3H), 0.89-0.73 (m, 5H). <sup>13</sup>C{<sup>1</sup>H} NMR (100 MHz, DMSO-*d*<sub>6</sub>) δ 180.6, 134.9, 120.7, 44.7, 44.4, 41.8, 36.6, 35.6, 28.0, 27.9, 26.7, 25.9, 24.2, 20.2, 16.6.

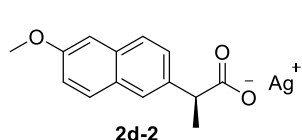

Silver(I) (*S*)-2-(6-methoxynaphthalen-2-yl)propanoate (**2d-2**). Following the general procedure, **2d-2** was obtained as a gray solid (1182 mg, 83%). <sup>1</sup>H NMR (400 MHz, Pyridine-*d*<sub>5</sub>) δ 8.19 (s, 1H), 8.12 (dd, *J* = 8.4, 1.2 Hz, 1H), 7.83 (d, *J* = 8.4 Hz, 1H), 7.74 (d, *J* = 8.8 Hz, 1H), 7.30 (d, *J* = 2.4 Hz, 1H), 7.24 (dd, *J* = 8.8, 2.4 Hz, 1H), 4.43 (q, *J* = 7.2 Hz, 1H), 3.76 (s, 3H), 1.97 (d, *J* = 7.2 Hz, 3H). <sup>13</sup>C{<sup>1</sup>H} NMR (100 MHz, Pyridine-*d*<sub>5</sub>) δ 179.3, 157.4, 142.2, 133.7, 126.7, 129.5, 128.5, 126.6, 126.1, 118.6, 106.1, 55.1, 49.5, 21.1.

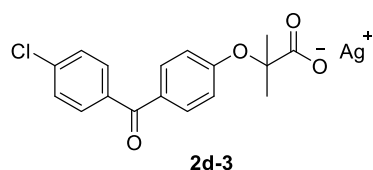

Silver(I) 2-(4-(4-chlorobenzoyl)phenoxy)-2-methylpropanoate (**2d-3**). Following the general procedure, **2d-3** was obtained as a gray solid (1950 mg, 92%). <sup>1</sup>H NMR (400 MHz, Pyridine-*d*<sub>5</sub>) δ 7.73 (d, *J* = 9.2 Hz, 2H), 7.66 (d, *J* = 8.4 Hz, 2H), 7.49-7.41 (m, 4H), 2.07 (s, 6H). <sup>13</sup>C{<sup>1</sup>H} NMR (100 MHz, Pyridine-*d*<sub>5</sub>) δ 193.7, 177.1, 162.8, 137.54, 137.50, 132.1, 131.3, 128.6, 128.4, 117.6, 82.8, 27.2.

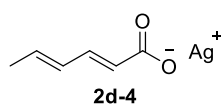

Silver(I) hexa-2,4-dienoate (**2d-4**). Following the general procedure, **2d-4** was obtained as a gray solid (937 mg, 86%). <sup>1</sup>H NMR (400 MHz, Pyridine-*d*<sub>5</sub>) δ 7.73 (dd, *J* = 15.2, 10.8 Hz, 1H), 6.73 (d, *J* = 15.2 Hz, 1H), 6.33-6.23 (m, 1H), 5.86-5.75 (m, 1H), 1.58 (d, *J* = 6.8 Hz, 3H). <sup>13</sup>C{<sup>1</sup>H} NMR (100 MHz, Pyridine-*d*<sub>5</sub>) δ 171.2, 146.7, 140.0, 134.7, 131.1, 13.7.

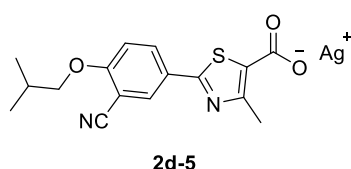

Silver(I) 2-(3-cyano-4-isobutoxyphenyl)-4-methylthiazole-5-carboxylate (**2d-5**). Following the general procedure, **2d-5** was obtained as a gray solid (1730 mg, 82%). <sup>1</sup>H NMR (400 MHz, Pyridine-*d*<sub>5</sub>) δ 8.47 (d, *J* = 2.0 Hz, 1H), 8.23 (dd, *J* = 8.8, 2.0 Hz, 1H), 7.03 (d, *J* = 8.8 Hz, 1H), 3.76 (d, *J* = 6.8 Hz, 2H), 3.25 (s, 3H), 2.07-1.95 (m, 1H), 0.96 (d, *J* = 6.8 Hz, 6H). <sup>13</sup>C{<sup>1</sup>H} NMR (100 MHz, Pyridine-*d*<sub>5</sub>) δ 166.8, 163.2, 161.7, 155.0, 132.5, 131.6, 127.8, 116.3, 113.3, 102.6, 75.5, 28.2, 18.9, 17.3.

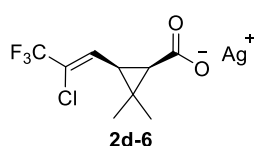

Silver(I) (*1R,3R*)-3-((*Z*)-2-chloro-3,3,3-trifluoroprop-1-en-1-yl)-2,2-dimethylcyclopropane-1-carboxylate (**2d-6**). Following the general procedure, **2d-6** was obtained as a gray solid (1566 mg, 90%). <sup>1</sup>H NMR (400 MHz, Pyridine-*d*<sub>5</sub>) δ 8.30 (d, *J* = 9.6 Hz, 1H), 2.64 (d, *J* = 8.0 Hz, 1H), 2.10 (t, *J* = 9.2 Hz, 1H), 1.60 (s, 3H), 1.20 (s, 3H). <sup>13</sup>C{<sup>1</sup>H} NMR (100 MHz, Pyridine-*d*<sub>5</sub>) δ 174.9, 137.1 (q, *J*<sub>C-F</sub> = 4.4 Hz), 121.8 (q, *J*<sub>C-F</sub> = 274.4 Hz), 116.9 (q,

$J_{C-F} = 36.5$  Hz), 39.5, 30.3, 28.9, 27.3, 16.3.  $^{19}\text{F}$  NMR (376 MHz, Pyridine- $d_5$ )  $\delta$  -67.2.

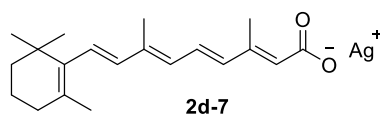

**2d-7**

Silver(I)

3,7-dimethyl-9-(2,6,6-trimethylcyclohex-1-en-1-yl)nona-2,4,6,8-tetraenoate (**2d-7**). Following the general procedure, **2d-7** was obtained as a gray solid (1624 mg, 80%).  $^1\text{H}$  NMR (400 MHz, DMSO- $d_6$ )  $\delta$  6.90 (dd,  $J = 15.2, 11.6$  Hz, 1H), 6.37 (d,  $J = 15.2$  Hz, 1H), 6.26-6.11 (m, 3H), 5.82 (s, 1H), 2.24 (s, 3H), 2.00 (t,  $J = 6.0$  Hz, 2H), 1.96 (s, 3H), 1.68 (s, 3H), 1.60-1.54 (m, 2H), 1.46-1.41 (m, 2H), 1.01 (s, 6H).  $^{13}\text{C}\{^1\text{H}\}$  NMR (100 MHz, DMSO- $d_6$ )  $\delta$  170.1, 138.2, 137.8, 137.6, 136.9, 130.6, 129.7, 129.63, 129.62, 127.7, 39.7, 34.4, 33.1, 29.3, 22.0, 19.2, 13.9, 13.1.

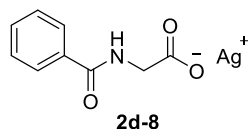

**2d-8**

Silver(I) benzoylglycinate (**2d-8**). Following the general procedure, **2d-8** was obtained as a gray solid (1182 mg, 83%).

$^1\text{H}$  NMR (400 MHz, DMSO- $d_6$ )  $\delta$  8.47 (t,  $J = 5.6$  Hz, 1H), 7.88-7.82 (m, 2H), 7.53-7.41 (m, 3H), 3.81 (d,  $J = 5.6$  Hz, 2H).

$^{13}\text{C}\{^1\text{H}\}$  NMR (100 MHz, DMSO- $d_6$ )  $\delta$  173.6, 166.1, 135.1, 131.5, 128.7, 127.6, 44.0.

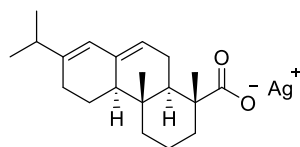

**3d-9**

Silver(I)

(1*R*,4*aR*,4*bR*,10*aR*)-7-isopropyl-1,4*a*-dimethyl-1,2,3,4,4*a*,4*b*,5,6,10,10*a*-decahydrophenanthrene-1-carboxylate (**2d-9**). Following the general procedure, **2d-9** was obtained as a gray solid (1773 mg, 90%).  $^1\text{H}$  NMR (400 MHz, DMSO- $d_6$ )  $\delta$  5.74 (s, 1H), 5.35 (s, 1H), 2.34-2.12 (m, 2H), 2.09-2.01 (m, 3H), 1.84-1.70 (m, 6H), 1.51-1.43 (m, 4H), 1.54 (s, 3H), 0.97 (dd,  $J = 6.8, 1.2$  Hz, 6H), 0.74 (s, 3H).  $^{13}\text{C}\{^1\text{H}\}$  NMR (100 MHz, DMSO- $d_6$ )  $\delta$  182.0, 144.4, 135.2, 123.0, 121.7, 51.1, 47.1, 46.1, 38.8, 38.5, 34.7, 34.6, 27.3, 25.9, 22.5, 21.8, 21.2, 19.0, 18.8, 14.3.

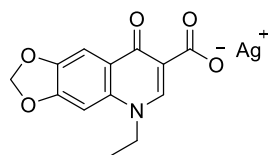

**3d-10**

Silver(I)

5-ethyl-8-oxo-5,8-dihydro-[1,3]dioxolo[4,5-*g*]quinoline-7-carboxylate (**2d-10**). Following the general procedure, **2d-10** was obtained as a gray solid (1508 mg, 82%).  $^1\text{H}$  NMR (400 MHz, Pyridine- $d_5$ )  $\delta$  9.07 (s, 1H), 8.26 (s, 1H), 7.14 (s, 1H), 6.08 (s, 2H), 4.17-3.91 (m, 2H), 1.14 (t,  $J = 6.8$  Hz, 3H).  $^{13}\text{C}\{^1\text{H}\}$  NMR (100 MHz, Pyridine- $d_5$ )  $\delta$  175.2, 170.8, 152.0, 146.7, 145.7, 136.3, 125.2, 104.5, 102.5, 95.8, 48.5, 14.3.



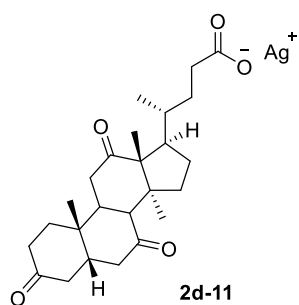

Silver(I)

(*R*)-4-((5*S*,8*R*,9*S*,10*S*,13*R*,14*S*,17*R*)-10,13-dimethyl-3,7,12-trioxohexadecahydro-1*H*-cyclopenta[*a*]phenanthren-17-yl)pentanoate (**2d-11**). Following the general procedure, **2d-11** was obtained as a gray solid (2088 mg, 80%). <sup>1</sup>H NMR (400 MHz, DMSO-*d*<sub>6</sub>) δ 3.07-2.94 (m, 2H), 2.83 (t, *J* = 12.6 Hz, 1H), 2.43 (dt, *J* = 12.4, 5.2 Hz, 1H), 2.34-1.92 (m, 9H), 1.87-1.63 (m, 6H), 1.49 (dt, *J* = 14.4, 4.0 Hz, 1H), 1.32 (s, 3H), 1.29-1.19 (m, 4H), 1.00 (s, 3H), 0.75 (d, *J* = 5.6 Hz, 3H). <sup>13</sup>C{<sup>1</sup>H} NMR (100 MHz, DMSO-*d*<sub>6</sub>) δ 212.8, 210.4, 210.3, 178.2, 55.8, 51.8, 48.6, 46.6, 46.2, 45.1, 44.7, 43.1, 39.0, 36.7, 36.2, 35.9, 35.1, 34.5, 32.9, 27.9, 25.2, 21.7, 19.5, 12.1.

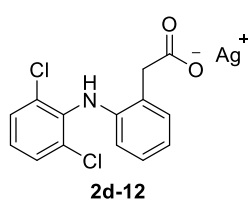

Silver(I)

2-(2-((2,6-dichlorophenyl)amino)phenyl)acetate

(**2d-12**). Following the general procedure, **2d-12** was obtained as a gray solid (1602 mg, 80%). <sup>1</sup>H NMR (400 MHz, DMSO-*d*<sub>6</sub>) δ 8.98 (s, 1H), 7.47 (d, *J* = 8.0 Hz, 2H), 7.15-7.07 (m, 2H), 6.98 (dt, *J* = 8.0, 1.6 Hz, 1H), 6.79 (dt, *J* = 7.2, 1.6 Hz, 1H), 6.28 (dd, *J* = 8.0, 1.2 Hz, 1H), 3.56 (s, 2H). <sup>13</sup>C{<sup>1</sup>H} NMR (100 MHz,

DMSO-*d*<sub>6</sub>) δ 176.0, 143.3, 138.1, 130.7, 129.6, 129.4, 127.6, 126.8, 124.8, 120.9, 116.4, 42.6.

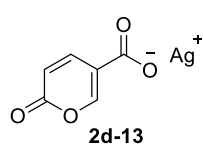

Silver(I) 2-oxo-2H-pyran-5-carboxylate (**2d-13**). Following the general procedure, **2d-13** was obtained as a gray solid (984 mg, 80%). <sup>1</sup>H NMR (400 MHz, DMSO-*d*<sub>6</sub>) δ 8.26 (dd, *J* = 2.6, 1.0 Hz, 1H), 7.88 (dd, *J* = 9.6, 2.6 Hz, 1H), 6.28 (dd, *J* = 9.6, 1.0 Hz).

<sup>13</sup>C{<sup>1</sup>H} NMR (100 MHz, DMSO-*d*<sub>6</sub>) δ 166.4, 161.4, 156.7, 145.7, 117.4, 114.0.

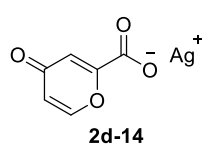

Silver(I) 4-oxo-4H-pyran-2-carboxylate (**2d-14**). Following the general procedure, **2d-14** was obtained as a gray solid (1082 mg, 88%). <sup>1</sup>H NMR (400 MHz, Pyridine-*d*<sub>5</sub>) δ 8.04 (d, *J* = 5.6 Hz, 1H), 7.62 (d, *J* = 2.8 Hz, 1H), 6.45 (dd, *J* = 5.6, 2.8 Hz, 1H). <sup>13</sup>C{<sup>1</sup>H}

NMR (100 MHz, Pyridine-*d*<sub>5</sub>) δ 179.9, 163.5, 161.0, 155.8, 117.7, 117.5.

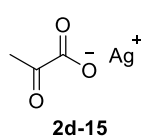

Silver(I) 2-oxopropanoate (**2d-15**). Following the general procedure, **2d-15** was obtained as a gray solid (873 mg, 90%). <sup>1</sup>H NMR (400 MHz, DMSO-*d*<sub>6</sub>) δ 2.20 (s, 3H). <sup>13</sup>C{<sup>1</sup>H} NMR (100 MHz, DMSO-*d*<sub>6</sub>) δ 203.0, 169.5, 27.8.

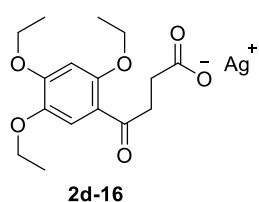

Silver(I) 4-oxo-4-(2,4,5-triethoxyphenyl)butanoate (**2d-16**). Following the general procedure, **2d-16** was obtained as a gray solid (1893 mg, 91%). <sup>1</sup>H NMR (400 MHz, Pyridine-*d*<sub>5</sub>) δ 7.80 (s, 1H), 6.65 (s, 1H), 4.06 (q, *J* = 6.8 Hz, 2H), 4.01 (q, *J* = 6.8

Hz, 2H), 3.92-3.85 (m, 4H), 3.37 (t,  $J = 6.8$  Hz, 2H), 1.37 (t,  $J = 6.8$  Hz, 3H), 1.32 (t,  $J = 6.8$  Hz, 3H), 1.23 (t,  $J = 6.8$  Hz, 3H).  $^{13}\text{C}\{^1\text{H}\}$  NMR (100 MHz, Pyridine- $d_5$ )  $\delta$  200.5, 178.1, 154.8, 153.7, 142.9, 120.7, 115.8, 99.5, 65.0, 64.9, 64.5, 42.3, 33.1, 15.0, 14.83, 14.76.

## 7. Characterization data of products **3aa-1–3wa**

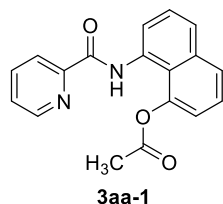

8-(Picolinamido)naphthalen-1-yl acetate (**3aa-1**). Following the general procedure, **3aa-1** was obtained as a colorless solid (56.4 mg, 92%).  $R_f = 0.40$  (n-hexane/EtOAc 3:1). m.p. 160.0–162.0 °C.  $^1\text{H}$  NMR (400 MHz,  $\text{CDCl}_3$ )  $\delta$  11.52 (s, 1H), 8.77 (d,  $J = 7.6$  Hz, 1H), 8.68-8.62 (m, 1H), 8.38 (d,  $J = 8.0$  Hz, 1H), 7.97-7.10 (m, 1H), 7.76 (d,  $J = 8.0$  Hz, 1H), 7.69 (d,  $J = 8.0$  Hz, 1H), 7.56-7.49 (m, 2H), 7.46 (t,  $J = 8.0$  Hz, 1H), 7.20 (d,  $J = 7.6$  Hz, 1H), 2.46 (s, 3H).  $^{13}\text{C}\{^1\text{H}\}$  NMR (100 MHz,  $\text{CDCl}_3$ )  $\delta$  169.6, 162.3, 150.3, 147.6, 145.8, 137.8, 136.4, 132.4, 127.2, 126.6, 126.4, 125.2, 125.0, 122.9, 120.4, 119.5, 119.2, 21.6. HRMS (ESI):  $m/z$   $[\text{M}+\text{H}]^+$  calcd for  $\text{C}_{18}\text{H}_{15}\text{N}_2\text{O}_3$ : 307.1083; found: 307.1077. FT-IR (neat,  $\text{cm}^{-1}$ )  $\nu$  3338, 2920, 1759, 1673, 1529, 1495, 1182, 724.

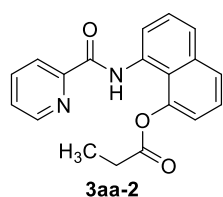

8-(Picolinamido)naphthalen-1-yl propionate (**3aa-2**). Following the general procedure, **3aa-2** was obtained as a colorless solid (49.9 mg, 78%).  $R_f = 0.48$  (n-hexane/EtOAc 3:1). m.p. 136.0–138.0 °C.  $^1\text{H}$  NMR (400 MHz,  $\text{CDCl}_3$ )  $\delta$  11.51 (s, 1H), 8.77 (d,  $J = 8.0$  Hz, 1H), 8.64 (d,  $J = 4.4$  Hz, 1H), 8.38 (d,  $J = 8.0$  Hz, 1H), 7.95 (dd,  $J = 8.0, 1.6$  Hz, 1H), 7.76 (d,  $J = 8.0$  Hz, 1H), 7.68 (d,  $J = 8.0$  Hz, 1H), 7.55-7.50 (m, 2H), 7.46 (t,  $J = 8.0$  Hz, 1H), 7.18 (dd,  $J = 7.6, 1.2$  Hz, 1H), 2.84 (q,  $J = 7.6$  Hz, 2H), 1.19 (t,  $J = 7.6$  Hz, 3H).  $^{13}\text{C}\{^1\text{H}\}$  NMR (100 MHz,  $\text{CDCl}_3$ )  $\delta$  173.2, 162.2, 150.3, 147.5, 126.0, 137.8, 136.4, 132.5, 127.1, 126.6, 126.4, 125.3, 125.0, 123.0, 120.3, 119.4, 119.3, 28.0, 8.9. HRMS (ESI):  $m/z$   $[\text{M}+\text{H}]^+$  calcd for  $\text{C}_{19}\text{H}_{17}\text{N}_2\text{O}_3$ : 321.1239; found: 321.1234. FT-IR (neat,  $\text{cm}^{-1}$ )  $\nu$  3343, 2925, 1761, 1674, 1530, 1496, 1108, 748.

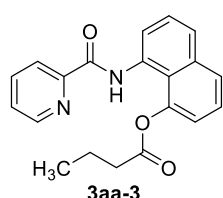

8-(Picolinamido)naphthalen-1-yl butyrate (**3aa-3**). Following the general procedure, **3aa-3** was obtained as a yellow solid (34.7 mg, 52%).  $R_f = 0.52$  (n-hexane/EtOAc 3:1). m.p. 104.0–106.0 °C.  $^1\text{H}$  NMR (400 MHz,  $\text{CDCl}_3$ )  $\delta$  11.50 (s, 1H), 8.76 (d,  $J = 7.6$  Hz, 1H), 8.66 (d,  $J = 4.4$  Hz, 1H), 8.38 (d,  $J = 8.0$  Hz, 1H), 7.95 (t,  $J = 7.6$  Hz, 1H), 7.75 (d,  $J = 7.6$  Hz, 1H), 7.68 (d,  $J = 8.0$  Hz, 1H), 7.56-7.50 (m, 2H), 7.46 (t,  $J = 7.6$  Hz, 1H), 7.17 (dd,  $J = 7.6, 0.8$  Hz, 1H), 2.77 (t,  $J = 7.6$  Hz, 2H), 1.77-1.67 (m, 2H), 0.92 (t,  $J = 7.6$  Hz, 3H).  $^{13}\text{C}\{^1\text{H}\}$  NMR (100 MHz,  $\text{CDCl}_3$ )  $\delta$  172.3, 162.2, 150.4, 147.6, 146.0, 137.8, 136.4, 132.5, 127.1, 126.6, 126.4, 125.3, 125.0, 123.0, 120.3,

119.4, 119.3, 36.3, 18.2, 13.5. HRMS (ESI):  $m/z$   $[M+H]^+$  calcd for  $C_{20}H_{19}N_2O_3$ : 335.1396; found: 335.1390. FT-IR (neat,  $cm^{-1}$ )  $\nu$  3338, 2925, 1759, 1677, 1529, 1496, 748.

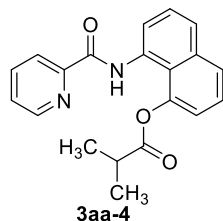

8-(Picolinamido)naphthalen-1-yl isobutyrate (**3aa-4**). Following the general procedure, **3aa-4** was obtained as a yellow solid (24.7 mg, 37%).  $R_f$  = 0.52 (n-hexane/EtOAc 3:1). m.p. 100.0–102.0 °C.  $^1H$  NMR (400 MHz,  $CDCl_3$ )  $\delta$  11.52 (s, 1H), 8.78 (d,  $J$  = 7.6 Hz, 1H), 8.63 (d,  $J$  = 4.8 Hz, 1H), 8.38 (d,  $J$  = 7.6 Hz, 1H), 7.95 (dt,  $J$  = 7.6, 1.6 Hz, 1H), 7.75 (d,  $J$  = 8.4 Hz, 1H), 7.68 (d,  $J$  = 8.0 Hz, 1H), 7.55–7.50 (m, 2H), 7.45 (t,  $J$  = 8.0 Hz, 1H), 7.13 (dd,  $J$  = 7.6, 0.8 Hz, 1H), 3.29–3.20 (m, 1H), 1.27 (d,  $J$  = 7.2 Hz, 6H).  $^{13}C\{^1H\}$  NMR (100 MHz,  $CDCl_3$ )  $\delta$  176.1, 162.3, 150.4, 147.5, 146.3, 137.8, 136.4, 132.6, 127.0, 126.5, 126.4, 125.3, 125.0, 123.0, 120.1, 119.3, 33.9, 18.8. HRMS (ESI):  $m/z$   $[M+H]^+$  calcd for  $C_{20}H_{19}N_2O_3$ : 335.1396; found: 335.1390. FT-IR (neat,  $cm^{-1}$ )  $\nu$  3346, 2923, 1763, 1684, 1530, 1497, 1075, 754.

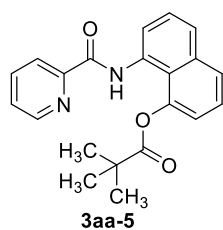

8-(Picolinamido)naphthalen-1-yl pivalate (**3aa-5**). Following the general procedure, **3aa-5** was obtained as a yellow oil (45.2 mg, 65%).  $R_f$  = 0.52 (n-hexane/EtOAc 3:1).  $^1H$  NMR (400 MHz,  $CDCl_3$ )  $\delta$  10.72 (s, 1H), 8.66 (d,  $J$  = 4.0 Hz, 1H), 8.47 (d,  $J$  = 7.6 Hz, 1H), 8.35 (d,  $J$  = 8.0 Hz, 1H), 7.93 (dt,  $J$  = 7.6, 1.6 Hz, 1H), 7.76 (d,  $J$  = 7.6 Hz, 1H), 7.72 (d,  $J$  = 8.0 Hz, 1H), 7.55–7.48 (m, 2H), 7.45 (t,  $J$  = 7.6 Hz, 1H), 7.04 (dd,  $J$  = 7.6, 1.2 Hz, 1H), 1.26 (s, 9H).  $^{13}C\{^1H\}$  NMR (100 MHz,  $CDCl_3$ )  $\delta$  178.1, 162.7, 150.3, 147.9, 147.3, 137.7, 136.4, 132.1, 127.0, 126.5, 126.3, 125.6, 125.4, 123.0, 121.0, 120.9, 120.0, 39.5, 26.9. HRMS (ESI):  $m/z$   $[M+H]^+$  calcd for  $C_{21}H_{21}N_2O_3$ : 349.1552; found: 349.1547. FT-IR (neat,  $cm^{-1}$ )  $\nu$  3349, 2925, 1752, 1683, 1528, 1495, 1086, 752.

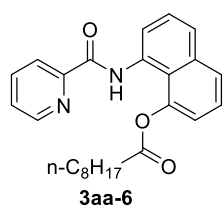

8-(Picolinamido)naphthalen-1-yl nonanoate (**3aa-6**). Following the general procedure, **3aa-6** was obtained as a colorless solid (38.8 mg, 48%).  $R_f$  = 0.75 (n-hexane/EtOAc 3:1). m.p. 94.0–96.0 °C.  $^1H$  NMR (400 MHz,  $CDCl_3$ )  $\delta$  11.50 (s, 1H), 8.76 (dd,  $J$  = 7.6, 0.8 Hz, 1H), 8.65 (d,  $J$  = 4.8 Hz, 1H), 8.38 (d,  $J$  = 8.0 Hz, 1H), 7.95 (dt,  $J$  = 7.6, 1.6 Hz, 1H), 7.76 (dd,  $J$  = 8.0, 1.2 Hz, 1H), 7.68 (dd,  $J$  = 8.0, 1.2 Hz, 1H), 7.56–7.50 (m, 2H), 7.46 (t,  $J$  = 8.0 Hz, 1H), 7.17 (dd,  $J$  = 7.6, 0.8 Hz, 1H), 2.77 (t,  $J$  = 7.6 Hz, 2H), 1.70–1.64 (m, 2H), 1.32–1.21 (m, 10H), 0.88 (t,  $J$  = 6.8 Hz, 3H).  $^{13}C\{^1H\}$  NMR (100 MHz,  $CDCl_3$ )  $\delta$  172.5, 162.2, 150.4, 147.6, 146.0, 137.8, 136.4, 132.5, 127.1, 126.5, 126.4, 125.3, 125.0, 123.0, 120.3, 119.4, 119.3, 34.5, 31.7, 29.2, 29.1, 24.7, 22.6, 14.1. HRMS (ESI):  $m/z$   $[M+H]^+$  calcd for  $C_{25}H_{29}N_2O_3$ : 405.2178; found: 405.2173. FT-IR (neat,  $cm^{-1}$ )  $\nu$  3361, 2922, 1766, 1683, 1529, 1496, 1091, 750.

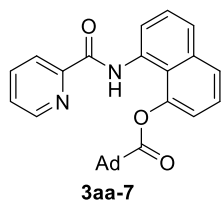

8-(picolinamido)naphthalen-1-yl adamantane-1-carboxylate (**3aa-7**). Following the general procedure, **3aa-7** was obtained as a yellow solid (50.3 mg, 59%).  $R_f = 0.52$  (n-hexane/EtOAc 3:1). m.p. 204.0–206.0 °C.  $^1\text{H NMR}$  (400 MHz,  $\text{CDCl}_3$ )  $\delta$  10.53 (s, 1H), 8.69 (d,  $J = 4.4$  Hz, 1H), 8.36 (d,  $J = 7.6$  Hz, 2H), 7.93 (dt,  $J = 7.6, 1.6$  Hz, 1H), 7.78–7.68 (m, 2H), 7.55–7.47 (m, 2H), 7.44 (t,  $J = 8.0$  Hz, 1H), 7.00 (dd,  $J = 7.6, 1.2$  Hz, 1H), 2.10–1.96 (m, 1H), 1.94–1.86 (m, 8H), 1.66–1.60 (m, 3H), 1.52–1.46 (m, 3H).  $^{13}\text{C}\{^1\text{H}\}$  NMR (100 MHz,  $\text{CDCl}_3$ )  $\delta$  177.1, 162.7, 150.5, 148.0, 147.3, 137.7, 136.4, 132.0, 126.9, 126.5, 126.2, 125.8, 125.5, 123.1, 121.4, 121.2, 120.2, 41.4, 38.3, 36.2, 27.7. HRMS (ESI):  $m/z$   $[\text{M}+\text{H}]^+$  calcd for  $\text{C}_{27}\text{H}_{27}\text{N}_2\text{O}_3$ : 427.2022; found: 427.2016. FT-IR (neat,  $\text{cm}^{-1}$ )  $\nu$  3365, 2914, 1746, 1684, 1527, 1496, 1198, 1032, 752.

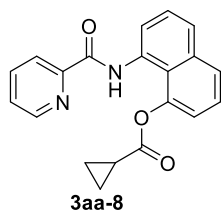

8-(Picolinamido)naphthalen-1-yl cyclopropanecarboxylate (**3aa-8**). Following the general procedure, **3aa-8** was obtained as a colorless solid (39.9 mg, 60%).  $R_f = 0.46$  (n-hexane/EtOAc 3:1). m.p. 148.0–150.0 °C.  $^1\text{H NMR}$  (400 MHz,  $\text{CDCl}_3$ )  $\delta$  11.55 (s, 1H), 8.68 (dd,  $J = 8.0, 1.2$  Hz, 1H), 8.60 (d,  $J = 4.4$  Hz, 1H), 8.38 (d,  $J = 8.0$  Hz, 1H), 7.94 (dt,  $J = 7.6, 1.6$  Hz, 1H), 7.76 (dd,  $J = 8.0, 1.2$  Hz, 1H), 7.69 (dd,  $J = 8.0, 1.2$  Hz, 1H), 7.53 (t,  $J = 8.0$  Hz, 1H), 7.51–7.47 (m, 1H), 7.45 (t,  $J = 8.0$  Hz, 1H), 7.19 (dd,  $J = 7.6, 1.2$  Hz, 1H), 2.19–2.12 (m, 1H), 1.04–0.98 (m, 2H), 0.73–0.67 (m, 2H).  $^{13}\text{C}\{^1\text{H}\}$  NMR (100 MHz,  $\text{CDCl}_3$ )  $\delta$  173.8, 162.3, 150.5, 147.6, 146.2, 137.6, 136.4, 132.4, 127.1, 126.41, 126.31, 125.5, 125.1, 122.8, 120.4, 119.8, 119.6, 13.5, 9.8. HRMS (ESI):  $m/z$   $[\text{M}+\text{H}]^+$  calcd for  $\text{C}_{20}\text{H}_{17}\text{N}_2\text{O}_3$ : 333.1239; found: 333.1234. FT-IR (neat,  $\text{cm}^{-1}$ )  $\nu$  3357, 2923, 1752, 1683, 1530, 1498, 1125, 1086, 752.

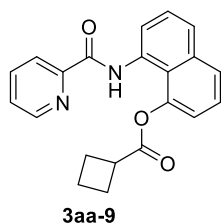

8-(Picolinamido)naphthalen-1-yl cyclobutanecarboxylate (**3aa-9**). Following the general procedure, **3aa-9** was obtained as a colorless solid (33.2 mg, 48%).  $R_f = 0.52$  (n-hexane/EtOAc 3:1). m.p. 127.0–129.0 °C.  $^1\text{H NMR}$  (400 MHz,  $\text{CDCl}_3$ )  $\delta$  11.46 (s, 1H), 8.77–8.69 (m, 2H), 8.37 (d,  $J = 8.0$  Hz, 1H), 7.95 (dt,  $J = 7.6, 1.6$  Hz, 1H), 7.76 (dd,  $J = 8.0, 1.2$  Hz, 1H), 7.68 (dd,  $J = 8.0, 1.2$  Hz, 1H), 7.57–7.50 (m, 2H), 7.46 (t,  $J = 8.0$  Hz, 1H), 7.17 (dd,  $J = 7.6, 1.2$  Hz, 1H), 3.81–3.70 (m, 1H), 2.43–2.32 (m, 2H), 2.18–2.08 (m, 2H), 2.00–1.92 (m, 2H).  $^{13}\text{C}\{^1\text{H}\}$  NMR (100 MHz,  $\text{CDCl}_3$ )  $\delta$  174.3, 162.2, 150.5, 147.5, 146.1, 137.8, 136.4, 132.5, 127.0, 126.6, 126.4, 125.3, 125.0, 123.0, 120.2, 119.4, 119.3, 38.2, 25.3, 18.5. HRMS (ESI):  $m/z$   $[\text{M}+\text{H}]^+$  calcd for  $\text{C}_{21}\text{H}_{19}\text{N}_2\text{O}_3$ : 347.1396; found: 347.1390. FT-IR (neat,  $\text{cm}^{-1}$ )  $\nu$  3345, 2924, 1758, 1682, 1529, 1496, 1108, 1032, 753.

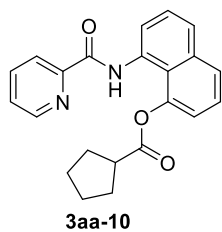

**3aa-10**

8-(Picolinamido)naphthalen-1-yl cyclopentanecarboxylate (**3aa-10**). Following the general procedure, **3aa-10** was obtained as a yellow solid (30.2 mg, 42%).  $R_f = 0.60$  (n-hexane/EtOAc 3:1). m.p. 116.0–118.0 °C.  $^1\text{H NMR}$  (400 MHz,  $\text{CDCl}_3$ )  $\delta$  11.53 (s, 1H), 8.76 (d,  $J = 7.6$  Hz, 1H), 8.62 (d,  $J = 3.6$  Hz, 1H), 8.38 (d,  $J = 7.6$  Hz, 1H), 7.95 (t,  $J = 7.6$  Hz, 1H), 7.75 (d,  $J = 8.0$  Hz, 1H), 7.68 (d,  $J = 8.0$  Hz, 1H), 7.57–7.49 (m, 2H), 7.45 (t,  $J = 8.0$  Hz, 1H), 7.15 (d,  $J = 7.6$  Hz, 1H), 3.46–3.35 (m, 1H), 1.94–1.82 (m, 4H), 1.79–1.71 (m, 2H), 1.61–1.53 (m, 2H).  $^{13}\text{C}\{^1\text{H}\}$  NMR (100 MHz,  $\text{CDCl}_3$ )  $\delta$  175.7, 162.2, 150.5, 147.4, 146.2, 137.8, 136.4, 132.6, 127.0, 126.5, 126.4, 125.3, 125.0, 123.0, 120.2, 119.4, 119.3, 43.8, 30.2, 25.8. HRMS (ESI):  $m/z$   $[\text{M}+\text{H}]^+$  calcd for  $\text{C}_{22}\text{H}_{21}\text{N}_2\text{O}_3$ : 361.1552; found: 361.1547. FT-IR (neat,  $\text{cm}^{-1}$ )  $\nu$  3339, 2928, 1760, 1682, 1529, 1496, 1105, 752.

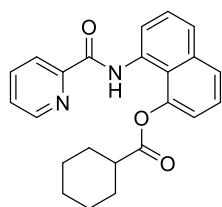

**3aa-11**

8-(Picolinamido)naphthalen-1-yl cyclohexanecarboxylate (**3aa-11**). Following the general procedure, **3aa-11** was obtained as a colorless solid (56.1 mg, 75%).  $R_f = 0.65$  (n-hexane/EtOAc 3:1). m.p. 148.0–150.0 °C.  $^1\text{H NMR}$  (400 MHz,  $\text{CDCl}_3$ )  $\delta$  11.42 (s, 1H), 8.74–8.67 (m, 2H), 8.38 (d,  $J = 8.0$  Hz, 1H), 7.96 (dt,  $J = 8.0, 1.6$  Hz, 1H), 7.75 (d,  $J = 8.0$  Hz, 1H), 7.69 (d,  $J = 8.0$  Hz, 1H), 7.56–7.50 (m, 2H), 7.45 (t,  $J = 7.6$  Hz, 1H), 7.10 (dd,  $J = 7.6, 1.2$  Hz, 1H), 2.95–2.86 (m, 1H), 1.97–1.90 (m, 2H), 1.83–1.68 (m, 3H), 1.66–1.61 (m, 1H), 1.59–1.50 (m, 2H), 1.20–1.12 (m, 2H).  $^{13}\text{C}\{^1\text{H}\}$  NMR (100 MHz,  $\text{CDCl}_3$ )  $\delta$  175.0, 162.2, 150.5, 147.7, 146.3, 137.8, 136.4, 132.5, 127.0, 126.5, 126.4, 125.3, 125.1, 123.0, 120.2, 119.6, 119.5, 42.7, 28.8, 25.6, 25.3. HRMS (ESI):  $m/z$   $[\text{M}+\text{H}]^+$  calcd for  $\text{C}_{23}\text{H}_{23}\text{N}_2\text{O}_3$ : 375.1709; found: 375.1703. FT-IR (neat,  $\text{cm}^{-1}$ )  $\nu$  3344, 2928, 1761, 1684, 1531, 1497, 1106, 1023, 751.

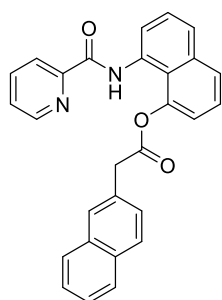

**3aa-12**

8-(Picolinamido)naphthalen-1-yl 2-(naphthalen-2-yl)acetate (**3aa-12**). Following the general procedure, **3aa-12** was obtained as a colorless solid (78.6 mg, 91%).  $R_f = 0.48$  (n-hexane/EtOAc 3:1). m.p. 178.0–180.0 °C.  $^1\text{H NMR}$  (400 MHz,  $\text{CDCl}_3$ )  $\delta$  11.67 (s, 1H), 8.81 (dd,  $J = 8.0, 1.2$  Hz, 1H), 8.68 (d,  $J = 4.4$  Hz, 1H), 8.42 (d,  $J = 7.6$  Hz, 1H), 8.10–8.04 (m, 1H), 7.93 (dt,  $J = 7.6, 1.6$  Hz, 1H), 7.90–7.85 (m, 1H), 7.82 (d,  $J = 8.0$  Hz, 1H), 7.73 (d,  $J = 7.6$  Hz, 1H), 7.69 (d,  $J = 8.0$  Hz, 1H), 7.58–7.41 (m, 6H), 7.36 (t,  $J = 8.0$  Hz, 1H), 6.99 (dd,  $J = 7.6, 1.2$  Hz, 1H), 4.58 (s, 2H).  $^{13}\text{C}\{^1\text{H}\}$  NMR (100 MHz,  $\text{CDCl}_3$ )  $\delta$  170.2, 162.3, 150.4, 147.7, 146.0, 137.9, 136.4, 133.9, 132.4, 132.0, 129.7, 128.8, 128.4, 127.9, 127.2, 126.7, 126.6, 126.5, 125.9, 125.5, 125.2, 125.1, 123.6, 123.1, 120.2, 119.6, 119.2, 39.1. HRMS (ESI):  $m/z$   $[\text{M}+\text{H}]^+$  calcd for  $\text{C}_{28}\text{H}_{21}\text{N}_2\text{O}_3$ : 433.1552; found: 433.1547. FT-IR (neat,  $\text{cm}^{-1}$ )  $\nu$  3349, 2923, 1766, 1682, 1530, 1497, 1101, 753.

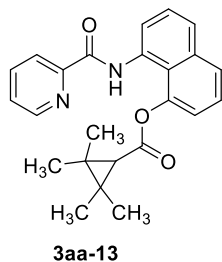

8-(Picolinamido)naphthalen-1-yl 2,2,3,3-tetramethylcyclopropane-1-carboxylate (**3aa-13**). Following the general procedure, **3aa-13** was obtained as a white solid (38.1 mg, 49%).  $R_f = 0.70$  (n-hexane/EtOAc 3:1). m.p. 172.0–174.0 °C.  $^1\text{H NMR}$  (400 MHz,  $\text{CDCl}_3$ )  $\delta$  11.70 (s, 1H), 8.77 (d,  $J = 7.2$  Hz, 1H), 8.67 (d,  $J = 4.8$  Hz, 1H), 8.40 (d,  $J = 8.0$  Hz, 1H), 7.93 (dt,  $J = 8.0, 1.6$  Hz, 1H), 7.74 (d,  $J = 8.0$  Hz, 1H), 7.66 (d,  $J = 7.6$  Hz, 1H), 7.54–7.43 (m, 3H), 7.18 (dd,  $J = 7.6, 0.8$  Hz, 1H), 1.79 (s, 1H), 1.16 (s, 6H), 0.90 (s, 6H).  $^{13}\text{C}\{^1\text{H}\}$  NMR (100 MHz,  $\text{CDCl}_3$ )  $\delta$  170.1, 162.0, 150.5, 147.9, 145.9, 137.7, 136.3, 132.8, 126.7, 126.4, 126.3, 125.2, 124.7, 122.9, 121.0, 119.5, 118.6, 35.2, 32.0, 22.9, 16.3. HRMS (ESI):  $m/z$   $[\text{M}+\text{H}]^+$  calcd for  $\text{C}_{24}\text{H}_{25}\text{N}_2\text{O}_3$ : 389.1865; found: 389.1860. FT-IR (neat,  $\text{cm}^{-1}$ )  $\nu$  3336, 2923, 1750, 1685, 1533, 1499, 1098, 1030, 752.

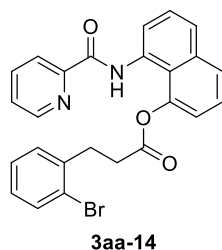

8-(picolinamido)naphthalen-1-yl 3-(2-bromophenyl)propanoate (**3aa-14**). Following the general procedure, **3aa-14** was obtained as a white solid (59.9 mg, 63%).  $R_f = 0.50$  (n-hexane/EtOAc 3:1). m.p. 124.0–126.0 °C.  $^1\text{H NMR}$  (400 MHz,  $\text{CDCl}_3$ )  $\delta$  11.48 (s, 1H), 8.78 (d,  $J = 7.6$  Hz, 1H), 8.46 (d,  $J = 4.4$  Hz, 1H), 8.34 (d,  $J = 8.0$  Hz, 1H), 7.91 (t,  $J = 7.2$  Hz, 1H), 7.76 (d,  $J = 8.0$  Hz, 1H), 7.68 (d,  $J = 8.4$  Hz, 1H), 7.57–7.49 (m, 2H), 7.47–7.38 (m, 2H), 7.24–7.14 (m, 2H), 7.13–7.07 (m, 2H), 3.19–3.09 (m, 4H).  $^{13}\text{C}\{^1\text{H}\}$  NMR (100 MHz,  $\text{CDCl}_3$ )  $\delta$  171.4, 162.2, 150.2, 147.7, 145.8, 139.3, 137.7, 136.4, 132.9, 132.5, 130.5, 128.3, 127.6, 127.2, 126.51, 126.45, 125.2, 125.0, 124.3, 122.9, 120.3, 119.4, 119.1, 34.3, 31.0. HRMS (ESI):  $m/z$   $[\text{M}+\text{H}]^+$  calcd for  $\text{C}_{25}\text{H}_{20}\text{BrN}_2\text{O}_3$ : 475.0657; found: 475.0652. FT-IR (neat,  $\text{cm}^{-1}$ )  $\nu$  3344, 2921, 1765, 1682, 1529, 1496, 1100, 750.

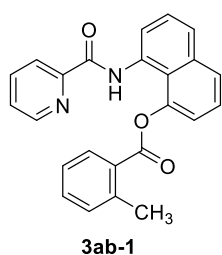

8-(Picolinamido)naphthalen-1-yl 2-methylbenzoate (**3ab-1**). Following the general procedure, **3ab-1** was obtained as a yellow solid (64.9 mg, 85%).  $R_f = 0.50$  (n-hexane/EtOAc 3:1). m.p. 128.0–130.0 °C.  $^1\text{H NMR}$  (400 MHz,  $\text{CDCl}_3$ )  $\delta$  11.43 (s, 1H), 8.66 (d,  $J = 7.6$  Hz, 1H), 8.26 (dd,  $J = 7.6, 0.8$  Hz, 1H), 8.16 (d,  $J = 7.6$  Hz, 1H), 7.81 (d,  $J = 8.0$  Hz, 1H), 7.75–7.68 (m, 2H), 7.56 (t,  $J = 8.0$  Hz, 1H), 7.50 (t,  $J = 8.0$  Hz, 1H), 7.43 (dt,  $J = 7.6, 1.2$  Hz, 1H), 7.30–7.22 (m, 3H), 7.18 (d,  $J = 7.6$  Hz, 1H), 7.13–7.07 (m, 1H), 2.47 (s, 3H).  $^{13}\text{C}\{^1\text{H}\}$  NMR (100 MHz,  $\text{CDCl}_3$ )  $\delta$  166.3, 162.4, 149.6, 147.1, 146.9, 141.7, 137.1, 136.5, 132.7, 132.4, 131.8, 131.7, 129.0, 127.3, 126.5, 125.81, 125.80, 125.5, 125.2, 122.0, 120.2, 120.1, 120.0, 21.6. HRMS (ESI):  $m/z$   $[\text{M}+\text{H}]^+$  calcd for  $\text{C}_{24}\text{H}_{19}\text{N}_2\text{O}_3$ : 383.1396; found: 383.1390. FT-IR (neat,  $\text{cm}^{-1}$ )  $\nu$  3334, 2922, 1741, 1685, 1531, 1497, 1218, 1031, 737.

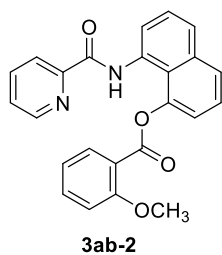

**3ab-2**

8-(Picolinamido)naphthalen-1-yl 2-methoxybenzoate (**3ab-2**). Following the general procedure, **3ab-2** was obtained as a yellow solid (39.8 mg, 50%).  $R_f = 0.20$  (n-hexane/EtOAc 3:1). m.p. 144.0–146.0 °C.  $^1\text{H NMR}$  (400 MHz,  $\text{CDCl}_3$ )  $\delta$  11.54 (s, 1H), 8.69 (d,  $J = 7.6$  Hz, 1H), 8.18 (d,  $J = 7.6$  Hz, 1H), 8.06 (dd,  $J = 7.6, 1.6$  Hz, 1H), 7.78 (d,  $J = 8.0$  Hz, 1H), 7.75–7.68 (m, 2H), 7.55 (t,  $J = 8.0$  Hz, 1H), 7.52–7.45 (m, 2H), 7.38 (d,  $J = 7.6$  Hz, 1H), 7.29 (d,  $J = 7.2$  Hz, 1H), 7.15–7.08 (m, 1H), 6.98 (t,  $J = 7.6$  Hz, 1H), 6.87 (d,  $J = 8.4$  Hz, 1H), 3.72 (s, 3H).  $^{13}\text{C}\{^1\text{H}\}$  NMR (100 MHz,  $\text{CDCl}_3$ )  $\delta$  164.7, 162.4, 159.9, 149.8, 147.2, 146.9, 137.0, 136.4, 134.3, 132.7, 132.6, 127.0, 126.4, 125.7, 125.4, 125.0, 122.0, 120.0, 119.9, 119.7, 119.5, 111.9, 55.8. HRMS (ESI):  $m/z$   $[\text{M}+\text{H}]^+$  calcd for  $\text{C}_{24}\text{H}_{19}\text{N}_2\text{O}_4$ : 399.1345; found: 399.1339. FT-IR (neat,  $\text{cm}^{-1}$ )  $\nu$  3336, 2925, 1750, 1684, 1531, 1495, 1214, 1025, 754.

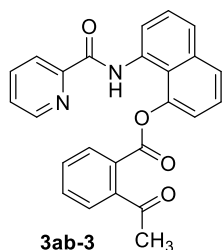

**3ab-3**

8-(Picolinamido)naphthalen-1-yl 2-acetylbenzoate (**3ab-3**). Following the general procedure, **3ab-3** was obtained as a yellow solid (50.0 mg, 61%).  $R_f = 0.20$  (n-hexane/EtOAc 3:1). m.p. 176.0–178.0 °C.  $^1\text{H NMR}$  (400 MHz,  $\text{CDCl}_3$ )  $\delta$  11.02 (s, 1H), 8.46 (d,  $J = 7.6$  Hz, 1H), 8.25 (d,  $J = 8.0$  Hz, 2H), 8.14 (d,  $J = 6.8$  Hz, 1H), 7.91 (d,  $J = 8.0$  Hz, 2H), 7.83 (d,  $J = 7.6$  Hz, 1H), 7.77 (d,  $J = 8.4$  Hz, 1H), 7.69 (t,  $J = 6.0$  Hz, 1H), 7.56 (t,  $J = 7.6$  Hz, 1H), 7.49 (t,  $J = 7.6$  Hz, 1H), 7.44 (d,  $J = 4.0$  Hz, 1H), 7.24 (d,  $J = 7.2$  Hz, 1H), 7.15–7.03 (m, 1H), 2.64 (s, 3H).  $^{13}\text{C}\{^1\text{H}\}$  NMR (100 MHz,  $\text{CDCl}_3$ )  $\delta$  197.3, 164.9, 162.4, 149.5, 147.0, 146.5, 140.4, 137.2, 136.5, 133.4, 131.8, 130.8, 128.0, 127.6, 126.5, 125.9, 125.8, 125.5, 122.3, 121.4, 120.6, 120.1, 26.9. HRMS (ESI):  $m/z$   $[\text{M}+\text{H}]^+$  calcd for  $\text{C}_{25}\text{H}_{19}\text{N}_2\text{O}_4$ : 411.1345; found: 411.1339. FT-IR (neat,  $\text{cm}^{-1}$ )  $\nu$  3351, 2922, 1742, 1685, 1529, 1496, 1226, 1055, 754.

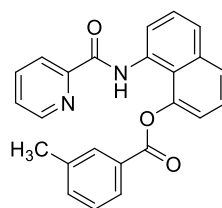

**3ab-5**

8-(picolinamido)naphthalen-1-yl 3-methylbenzoate (**3ab-5**). Following the general procedure, **3ab-5** was obtained as a yellow solid (63.1 mg, 71%).  $R_f = 0.50$  (n-hexane/EtOAc 3:1). m.p. 156.0–158.0 °C.  $^1\text{H NMR}$  (400 MHz,  $\text{CDCl}_3$ )  $\delta$  11.31 (s, 1H), 8.59 (d,  $J = 7.6$  Hz, 1H), 8.17 (d,  $J = 7.6$  Hz, 1H), 8.04 (d,  $J = 7.6$  Hz, 1H), 8.00 (s, 1H), 7.81 (d,  $J = 8.0$  Hz, 1H), 7.77–7.69 (m, 2H), 7.56 (t,  $J = 8.0$  Hz, 1H), 7.49 (t,  $J = 8.0$  Hz, 1H), 7.40 (d,  $J = 7.6$  Hz, 1H), 7.35–7.30 (m, 2H), 7.23 (dd,  $J = 7.6, 0.4$  Hz, 1H), 7.15–7.09 (m, 1H), 2.37 (s, 3H).  $^{13}\text{C}\{^1\text{H}\}$  NMR (100 MHz,  $\text{CDCl}_3$ )  $\delta$  166.1, 162.6, 149.7, 147.2, 147.1, 138.2, 137.0, 136.5, 134.3, 132.3, 131.2, 129.8, 128.3, 128.0, 127.3, 126.5, 125.8, 125.5, 125.4, 122.1, 120.5, 120.4, 120.1, 21.2. HRMS (ESI):  $m/z$   $[\text{M}+\text{H}]^+$  calcd for  $\text{C}_{24}\text{H}_{19}\text{N}_2\text{O}_3$ : 383.1396; found: 383.1390. FT-IR (neat,  $\text{cm}^{-1}$ )  $\nu$  3344, 2920, 1739, 1684, 1530, 1496, 1260, 1177, 1050, 748.

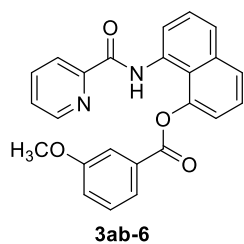

**3ab-6**

8-(Picolinamido)naphthalen-1-yl 3-methoxybenzoate (**3ab-6**). Following the general procedure, **3ab-6** was obtained as a yellow solid (50.9 mg, 64%).  $R_f = 0.30$  (n-hexane/EtOAc 3:1). m.p. 142.0–144.0 °C.  $^1\text{H NMR}$  (400 MHz,  $\text{CDCl}_3$ )  $\delta$  11.26 (s, 1H), 8.57 (d,  $J = 7.6$  Hz, 1H), 8.16 (d,  $J = 7.6$  Hz, 1H), 7.84 (d,  $J = 7.6$  Hz, 1H), 7.81 (d,  $J = 8.0$  Hz, 1H), 7.77–7.65 (m, 3H), 7.56 (t,  $J = 7.6$  Hz, 1H), 7.49 (t,  $J = 7.6$  Hz, 1H), 7.44 (d,  $J = 4.4$  Hz, 1H), 7.33 (t,  $J = 8.0$  Hz, 1H), 7.23 (dd,  $J = 7.6, 0.8$  Hz, 1H), 7.16–7.08 (m, 2H), 3.80 (s, 3H).  $^{13}\text{C}\{^1\text{H}\}$  NMR (100 MHz,  $\text{CDCl}_3$ )  $\delta$  165.7, 162.5, 159.4, 149.6, 147.2, 146.9, 137.0, 136.4, 132.2, 131.0, 129.3, 127.3, 126.5, 125.9, 125.5, 125.4, 123.2, 122.1, 120.7, 120.4, 120.3, 120.0, 114.7, 55.4. HRMS (ESI):  $m/z$   $[\text{M}+\text{H}]^+$  calcd for  $\text{C}_{24}\text{H}_{19}\text{N}_2\text{O}_4$ : 399.1345; found: 399.1339. FT-IR (neat,  $\text{cm}^{-1}$ )  $\nu$  3351, 2916, 1737, 1683, 1529, 1492, 1263, 1206, 1032, 748.

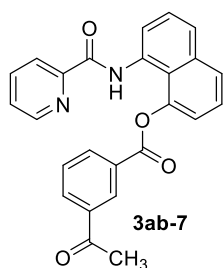

**3ab-7**

8-(Picolinamido)naphthalen-1-yl 3-acetylbenzoate (**3ab-7**). Following the general procedure, **3ab-7** was obtained as a yellow solid (49.2 mg, 60%).  $R_f = 0.20$  (n-hexane/EtOAc 3:1). m.p. 147.0–149.0 °C.  $^1\text{H NMR}$  (400 MHz,  $\text{CDCl}_3$ )  $\delta$  11.00 (s, 1H), 8.67 (s, 1H), 8.43 (d,  $J = 7.6$  Hz, 1H), 8.38 (d,  $J = 7.6$  Hz, 1H), 8.16–8.10 (m, 2H), 7.83 (d,  $J = 8.0$  Hz, 1H), 7.76 (d,  $J = 7.6$  Hz, 1H), 7.67 (dt,  $J = 7.6, 1.2$  Hz, 1H), 7.56 (t,  $J = 7.6$  Hz, 1H), 7.50 (dt,  $J = 7.6, 2.4$  Hz, 2H), 7.40 (d,  $J = 4.4$  Hz, 1H), 7.24 (dd,  $J = 7.6, 0.8$  Hz, 1H), 7.08 (dd,  $J = 7.6, 4.4$  Hz, 1H), 2.59 (s, 3H).  $^{13}\text{C}\{^1\text{H}\}$  NMR (100 MHz,  $\text{CDCl}_3$ )  $\delta$  196.9, 164.9, 162.3, 149.4, 147.0, 146.5, 137.1, 136.4, 134.8, 132.6, 131.7, 130.5, 130.2, 128.8, 127.5, 126.5, 125.9, 125.8, 125.5, 122.2, 121.6, 120.7, 120.1, 26.7. HRMS (ESI):  $m/z$   $[\text{M}+\text{H}]^+$  calcd for  $\text{C}_{25}\text{H}_{19}\text{N}_2\text{O}_4$ : 411.1345; found: 411.1339. FT-IR (neat,  $\text{cm}^{-1}$ )  $\nu$  3344, 2920, 1743, 1686, 1529, 1496, 1211, 749.

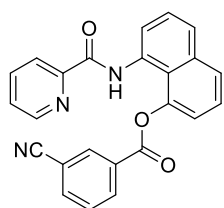

**3ab-8**

8-(Picolinamido)naphthalen-1-yl 3-cyanobenzoate (**3ab-8**). Following the general procedure, **3ab-8** was obtained as a yellow solid (35.4 mg, 45%).  $R_f = 0.20$  (n-hexane/EtOAc 3:1). m.p. 176.0–178.0 °C.  $^1\text{H NMR}$  (400 MHz,  $\text{CDCl}_3$ )  $\delta$  10.8 (s, 1H), 8.45 (s, 1H), 8.35 (dt,  $J = 8.8, 1.6$  Hz, 1H), 8.31 (d,  $J = 7.6$  Hz, 1H), 8.17 (d,  $J = 8.0$  Hz, 1H), 7.86 (dd,  $J = 8.4, 1.2$  Hz, 1H), 7.82–7.74 (m, 3H), 7.72 (d,  $J = 4.8$  Hz, 1H), 7.57 (t,  $J = 8.0$  Hz, 1H), 7.53–7.46 (m, 2H), 7.25–7.20 (m, 2H).  $^{13}\text{C}\{^1\text{H}\}$  NMR (100 MHz,  $\text{CDCl}_3$ )  $\delta$  163.8, 162.4, 149.5, 147.2, 146.2, 137.4, 136.5, 136.3, 134.5, 134.0, 131.4, 130.9, 129.3, 127.9, 126.6, 126.21, 126.18, 125.5, 122.5, 122.3, 121.0, 120.1, 117.5, 112.8. HRMS (ESI):  $m/z$   $[\text{M}+\text{H}]^+$  calcd for  $\text{C}_{24}\text{H}_{16}\text{N}_3\text{O}_3$ : 394.1192; found: 394.1186. FT-IR (neat,  $\text{cm}^{-1}$ )  $\nu$  3362, 2918, 1745, 1684, 1529, 1495, 1258, 1166, 749.



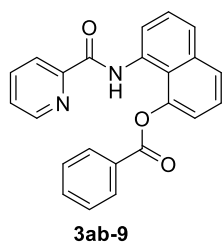

**3ab-9**

8-(Picolinamido)naphthalen-1-yl benzoate (**3ab-9**). Following the general procedure, **3ab-9** was obtained as a yellow solid (62.6 mg, 85%). m.p. 148.0–150.0 °C.  $R_f = 0.38$  (n-hexane/EtOAc 3:1).  $^1\text{H}$  NMR (400 MHz,  $\text{CDCl}_3$ )  $\delta$  11.34 (s, 1H), 8.63 (d,  $J = 7.6$  Hz, 1H), 8.23 (d,  $J = 7.2$  Hz, 2H), 8.16 (d,  $J = 7.6$  Hz, 1H), 7.81 (d,  $J = 8.0$  Hz, 1H), 7.76–7.67 (m, 2H), 7.63–7.54 (m, 2H), 7.49 (t,  $J = 8.0$  Hz, 1H), 7.44 (t,  $J = 8.0$  Hz, 2H), 7.31 (t,  $J = 4.4$  Hz, 1H), 7.23 (dd,  $J = 7.6, 0.8$  Hz, 1H), 7.13–7.08 (m, 1H).  $^{13}\text{C}\{^1\text{H}\}$  NMR (100 MHz,  $\text{CDCl}_3$ )  $\delta$  165.9, 162.5, 149.6, 147.2, 147.0, 137.1, 136.5, 133.5, 132.3, 130.7, 129.9, 128.4, 127.3, 126.5, 125.8, 125.5, 125.4, 122.1, 120.4, 120.3, 120.0. HRMS (ESI):  $m/z$   $[\text{M}+\text{H}]^+$  calcd for  $\text{C}_{23}\text{H}_{17}\text{N}_2\text{O}_3$ : 369.1239; found: 369.1234. FT-IR (neat,  $\text{cm}^{-1}$ )  $\nu$  3345, 2921, 1740, 1683, 1529, 1495, 1220, 1049, 752.

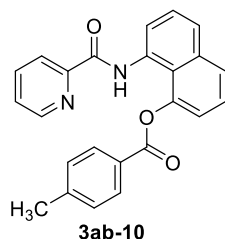

**3ab-10**

8-(Picolinamido)naphthalen-1-yl 4-methylbenzoate (**3ab-10**). Following the general procedure, **3ab-10** was obtained as a yellow solid (71.8 mg, 94%).  $R_f = 0.38$  (n-hexane/EtOAc 3:1). m.p. 159.0–161.0 °C.  $^1\text{H}$  NMR (400 MHz,  $\text{CDCl}_3$ )  $\delta$  11.33 (s, 1H), 8.62 (d,  $J = 7.6$  Hz, 1H), 8.15 (d,  $J = 7.6$  Hz, 1H), 8.10 (d,  $J = 7.6$  Hz, 2H), 7.80 (d,  $J = 8.4$  Hz, 1H), 7.75–7.68 (m, 2H), 7.56 (t,  $J = 8.0$  Hz, 1H), 7.48 (t,  $J = 8.0$  Hz, 1H), 7.37 (d,  $J = 4.4$  Hz, 1H), 7.24–7.18 (m, 3H), 7.15–7.09 (m, 1H), 2.43 (s, 3H).  $^{13}\text{C}\{^1\text{H}\}$  NMR (100 MHz,  $\text{CDCl}_3$ )  $\delta$  165.6, 162.5, 149.6, 147.2, 147.0, 144.3, 137.0, 136.4, 132.3, 130.8, 129.0, 127.2, 127.1, 126.4, 125.6, 125.5, 125.3, 122.1, 120.31, 120.29, 120.0, 21.7. HRMS (ESI):  $m/z$   $[\text{M}+\text{H}]^+$  calcd for  $\text{C}_{24}\text{H}_{19}\text{N}_2\text{O}_3$ : 383.1396; found: 383.1390. FT-IR (neat,  $\text{cm}^{-1}$ )  $\nu$  3345, 2920, 1737, 1683, 1529, 1496, 1219, 1049, 748.

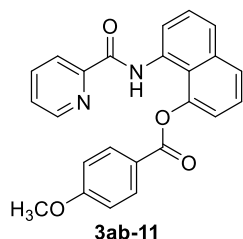

**3ab-11**

8-(Picolinamido)naphthalen-1-yl 4-methoxybenzoate (**3ab-11**). Following the general procedure, **3ab-11** was obtained as a white solid (54.1 mg, 68%).  $R_f = 0.50$  (n-hexane/EtOAc 3:1). m.p. 209.0–211.0 °C.  $^1\text{H}$  NMR (400 MHz,  $\text{CDCl}_3$ )  $\delta$  11.36 (s, 1H), 8.59 (dd,  $J = 7.6, 0.8$  Hz, 1H), 8.22–8.14 (m, 3H), 7.80 (dd,  $J = 8.4, 1.2$  Hz, 1H), 7.77–7.72 (m, 2H), 7.56 (t,  $J = 8.0$  Hz, 1H), 7.52–7.46 (m, 2H), 7.22 (dd,  $J = 7.6, 1.2$  Hz, 1H), 7.20–7.15 (m, 1H), 6.92–6.86 (m, 2H), 3.90 (s, 3H).  $^{13}\text{C}\{^1\text{H}\}$  NMR (100 MHz,  $\text{CDCl}_3$ )  $\delta$  165.6, 163.8, 162.4, 149.7, 147.2, 147.1, 137.3, 136.5, 133.0, 132.3, 127.1, 126.5, 125.8, 125.5, 125.4, 122.3, 122.2, 120.5, 120.4, 120.1, 113.6, 55.6. HRMS (ESI):  $m/z$   $[\text{M}+\text{H}]^+$  calcd for  $\text{C}_{24}\text{H}_{19}\text{N}_2\text{O}_4$ : 399.1345; found: 399.1339. FT-IR (neat,  $\text{cm}^{-1}$ )  $\nu$  3337, 2922, 1731, 1680, 1527, 1496, 1247, 1028, 754.

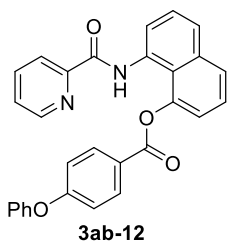

8-(Picolinamido)naphthalen-1-yl 4-phenoxybenzoate (**3ab-12**). Following the general procedure, **3ab-12** was obtained as a white solid (88.3 mg, 96%).  $R_f = 0.38$  (n-hexane/EtOAc 3:1). m.p. 137.0–139.0 °C.  $^1\text{H NMR}$  (400 MHz,  $\text{CDCl}_3$ )  $\delta$  11.31 (s, 1H), 8.62 (dd,  $J = 8.0, 1.2$  Hz, 1H), 8.24–8.17 (m, 3H), 7.84–7.74 (m, 3H), 7.65–7.61 (m, 1H), 7.58 (t,  $J = 8.0$  Hz, 1H), 7.53–7.43 (m, 3H), 7.29–7.22 (m, 3H), 7.13–7.07 (m, 2H), 7.00–7.95 (m, 2H).  $^{13}\text{C}\{^1\text{H}\}$  NMR (100 MHz,  $\text{CDCl}_3$ )  $\delta$  165.2, 162.4, 162.2, 155.3, 149.7, 147.2, 146.9, 137.1, 136.4, 132.9, 132.2, 130.1, 127.2, 126.4, 125.8, 125.5, 125.4, 124.7, 123.8, 122.2, 120.5, 120.3, 120.1, 120.0, 117.1. HRMS (ESI):  $m/z$   $[\text{M}+\text{H}]^+$  calcd for  $\text{C}_{29}\text{H}_{21}\text{N}_2\text{O}_4$ : 461.1501; found: 461.1496. FT-IR (neat,  $\text{cm}^{-1}$ )  $\nu$  3344, 2922, 1737, 1684, 1530, 1494, 1240, 1048, 751.

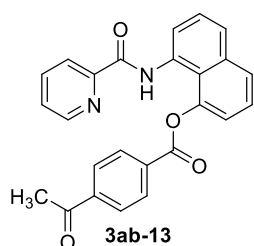

8-(Picolinamido)naphthalen-1-yl 4-acetylbenzoate (**3ab-13**). Following the general procedure, **3ab-13** was obtained as a yellow solid (25.4 mg, 31%).  $R_f = 0.20$  (n-hexane/EtOAc 3:1). m.p. 173.0–175.0 °C.  $^1\text{H NMR}$  (400 MHz,  $\text{CDCl}_3$ )  $\delta$  11.01 (s, 1H), 8.46 (d,  $J = 8.0$  Hz, 1H), 8.26 (d,  $J = 8.0$  Hz, 2H), 8.14 (d,  $J = 8.0$  Hz, 1H), 7.93 (d,  $J = 8.0$  Hz, 2H), 7.84 (d,  $J = 8.0$  Hz, 1H), 7.78 (d,  $J = 8.0$  Hz, 1H), 7.71 (t,  $J = 7.2$  Hz, 1H), 7.57 (t,  $J = 8.0$  Hz, 1H), 7.51 (t,  $J = 8.0$  Hz, 1H), 7.46 (d,  $J = 4.8$  Hz, 1H), 7.25 (d,  $J = 8.0$  Hz, 1H), 7.13–7.07 (m, 1H), 2.65 (s, 3H).  $^{13}\text{C}\{^1\text{H}\}$  NMR (100 MHz,  $\text{CDCl}_3$ )  $\delta$  197.3, 164.9, 162.5, 149.6, 147.1, 146.6, 140.5, 137.2, 136.5, 133.4, 131.8, 130.9, 128.0, 127.6, 126.6, 125.9, 125.8, 125.5, 122.3, 121.5, 120.6, 120.1, 26.9. HRMS (ESI):  $m/z$   $[\text{M}+\text{H}]^+$  calcd for  $\text{C}_{25}\text{H}_{19}\text{N}_2\text{O}_4$ : 411.1345; found: 411.1339. FT-IR (neat,  $\text{cm}^{-1}$ )  $\nu$  3355, 2917, 1741, 1684, 1529, 1496, 1228, 1053, 754.

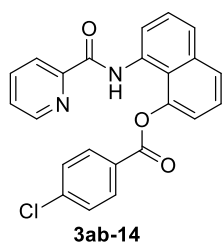

8-(Picolinamido)naphthalen-1-yl 4-chlorobenzoate (**3ab-14**). Following the general procedure, **3ab-14** was obtained as a yellow solid (70.8 mg, 88%).  $R_f = 0.48$  (n-hexane/EtOAc 3:1). m.p. 143.0–145.0 °C.  $^1\text{H NMR}$  (400 MHz,  $\text{CDCl}_3$ )  $\delta$  11.00 (s, 1H), 8.45 (d,  $J = 7.6$  Hz, 1H), 8.16 (d,  $J = 7.6$  Hz, 1H), 8.09 (d,  $J = 7.6$  Hz, 2H), 7.82 (d,  $J = 8.4$  Hz, 1H), 7.78–7.71 (m, 2H), 7.59–7.53 (m, 2H), 7.48 (t,  $J = 7.6$  Hz, 1H), 7.32 (d,  $J = 7.6$  Hz, 2H), 7.24–7.18 (m, 2H).  $^{13}\text{C}\{^1\text{H}\}$  NMR (100 MHz,  $\text{CDCl}_3$ )  $\delta$  146.9, 162.4, 149.5, 147.1, 146.6, 139.9, 137.2, 136.4, 131.9, 131.8, 128.6, 128.1, 127.5, 126.5, 125.9, 125.8, 125.5, 122.3, 121.5, 120.7, 120.1. HRMS (ESI):  $m/z$   $[\text{M}+\text{H}]^+$  calcd for  $\text{C}_{23}\text{H}_{16}\text{ClN}_2\text{O}_3$ : 403.0849; found: 403.0844. FT-IR (neat,  $\text{cm}^{-1}$ )  $\nu$  3349, 2926, 1740, 1683, 1528, 1492, 1219, 1051, 750.

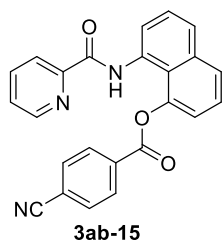

8-(Picolinamido)naphthalen-1-yl 4-cyanobenzoate (**3ab-15**). Following the general procedure, **3ab-15** was obtained as a white solid (55.0 mg, 70%).  $R_f = 0.25$  (n-hexane/EtOAc 3:1). m.p. 163.0–165.0 °C.  $^1\text{H NMR}$  (400 MHz,  $\text{CDCl}_3$ )  $\delta$  10.78 (s, 1H), 8.35 (d,  $J = 7.2$  Hz, 1H), 8.25 (d,  $J = 8.0$  Hz, 2H), 8.15 (d,  $J = 7.2$  Hz, 1H), 7.85 (d,  $J = 7.6$  Hz, 1H), 7.82–7.72 (m, 2H), 7.63 (d,  $J = 8.0$  Hz, 2H), 7.60–7.54 (m, 2H), 7.51 (t,  $J = 8.0$  Hz, 1H), 7.25–7.19 (m, 2H).  $^{13}\text{C}\{^1\text{H}\}$  NMR (100 MHz,  $\text{CDCl}_3$ )  $\delta$  164.1, 162.4, 149.5, 147.0, 146.2, 137.4, 136.5, 133.4, 132.0, 131.4, 131.0, 127.9, 126.6, 126.2, 126.1, 125.5, 122.5, 122.3, 120.8, 120.1, 117.7, 116.7. HRMS (ESI):  $m/z$   $[\text{M}+\text{H}]^+$  calcd for  $\text{C}_{24}\text{H}_{16}\text{N}_3\text{O}_3$ : 394.1192; found: 394.1186. FT-IR (neat,  $\text{cm}^{-1}$ )  $\nu$  3352, 2921, 1745, 1685, 1530, 1496, 1251, 1222, 1061, 754.

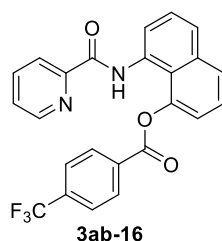

8-(Picolinamido)naphthalen-1-yl 4-(trifluoromethyl)benzoate (**3ab-16**). Following the general procedure, **3ab-16** was obtained as a yellow solid (49.7 mg, 57%).  $R_f = 0.52$  (n-hexane/EtOAc 3:1). m.p. 150.0–152.0 °C.  $^1\text{H NMR}$  (400 MHz,  $\text{CDCl}_3$ )  $\delta$  10.80 (s, 1H), 8.33 (d,  $J = 7.6$  Hz, 1H), 8.24 (d,  $J = 8.0$  Hz, 2H), 8.13 (d,  $J = 8.0$  Hz, 1H), 7.85 (d,  $J = 8.0$  Hz, 1H), 7.79 (d,  $J = 8.0$  Hz, 1H), 7.71 (dt,  $J = 7.6, 1.6$  Hz, 1H), 7.61–7.48 (m, 5H), 7.25 (dd,  $J = 7.6, 0.8$  Hz, 1H), 7.17–7.11 (m, 1H).  $^{13}\text{C}\{^1\text{H}\}$  NMR (100 MHz,  $\text{CDCl}_3$ )  $\delta$  164.5, 162.5, 149.5, 147.1, 146.4, 137.3, 136.6, 134.7 (q,  $J_{\text{C-F}} = 32.6$  Hz), 132.9, 131.6, 130.9, 127.8, 126.6, 126.2, 126.1, 125.3, 125.2 (q,  $J_{\text{C-F}} = 3.7$  Hz), 123.5 (q,  $J_{\text{C-F}} = 271.1$  Hz), 122.4, 121.0, 120.2.  $^{19}\text{F}$  NMR (376 MHz,  $\text{CDCl}_3$ )  $\delta$  -63.2. HRMS (ESI):  $m/z$   $[\text{M}+\text{H}]^+$  calcd for  $\text{C}_{24}\text{H}_{16}\text{F}_3\text{N}_2\text{O}_3$ : 437.1113; found: 437.1108. FT-IR (neat,  $\text{cm}^{-1}$ )  $\nu$  3345, 2920, 1744, 1684, 1528, 1494, 1321, 1063, 752.

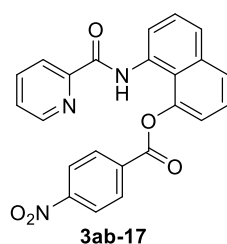

8-(Picolinamido)naphthalen-1-yl 4-nitrobenzoate (**3ab-17**). Following the general procedure, **3ab-17** was obtained as a yellow solid (57.8 mg, 70%).  $R_f = 0.28$  (n-hexane/EtOAc 3:1). m.p. 187.0–189.0 °C.  $^1\text{H NMR}$  (400 MHz,  $\text{CDCl}_3$ )  $\delta$  10.72 (s, 1H), 8.30 (d,  $J = 8.8$  Hz, 3H), 8.13 (d,  $J = 8.8$  Hz, 3H), 7.86 (dd,  $J = 8.0, 1.2$  Hz, 1H), 7.80 (dd,  $J = 8.0, 1.2$  Hz, 1H), 7.72 (dt,  $J = 7.6, 1.6$  Hz, 1H), 7.63–7.60 (m, 1H), 7.57 (t,  $J = 8.0$  Hz, 1H), 7.52 (t,  $J = 8.0$  Hz, 1H), 7.25 (dd,  $J = 7.6, 1.2$  Hz, 1H), 7.18–7.13 (m, 1H).  $^{13}\text{C}\{^1\text{H}\}$  NMR (100 MHz,  $\text{CDCl}_3$ )  $\delta$  163.8, 162.4, 150.5, 149.5, 147.0, 146.1, 137.4, 136.5, 134.9, 131.6, 131.3, 127.9, 126.6, 126.3, 126.1, 125.5, 123.2, 122.6, 122.5, 120.9, 120.1. HRMS (ESI):  $m/z$   $[\text{M}+\text{H}]^+$  calcd for  $\text{C}_{23}\text{H}_{16}\text{N}_3\text{O}_5$ : 414.1090; found: 414.1084. FT-IR (neat,  $\text{cm}^{-1}$ )  $\nu$  3342, 2923, 1742, 1673, 1523, 1496, 1240, 1063, 753.

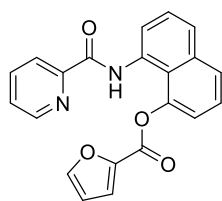

**3ab-18**

8-(Picolinamido)naphthalen-1-yl furan-2-carboxylate (**3ab-18**). Following the general procedure, **3ab-18** was obtained as a white solid (40.1 mg, 56%).  $R_f = 0.25$  (n-hexane/EtOAc 3:1). m.p. 167.0–169.0 °C.  $^1\text{H NMR}$  (400 MHz,  $\text{CDCl}_3$ )  $\delta$  11.19 (s, 1H), 8.51 (d,  $J = 7.6$  Hz, 1H), 8.22 (d,  $J = 8.0$  Hz, 1H), 7.92 (d,  $J = 4.0$  Hz, 1H), 7.83–7.72 (m, 3H), 7.59–7.52 (m, 2H), 7.48 (t,  $J = 7.6$  Hz, 1H), 7.37 (d,  $J = 7.6$  Hz, 1H), 7.29–7.21 (m, 2H), 6.50–6.42 (m, 1H).  $^{13}\text{C}\{^1\text{H}\}$  NMR (100 MHz,  $\text{CDCl}_3$ )  $\delta$  162.5, 157.2, 149.8, 147.4, 147.1, 146.0, 144.2, 137.3, 136.4, 132.0, 127.5, 126.5, 125.9, 125.6, 125.4, 122.3, 121.1, 120.4, 120.2, 120.0, 112.2. HRMS (ESI):  $m/z$   $[\text{M}+\text{H}]^+$  calcd for  $\text{C}_{21}\text{H}_{15}\text{N}_2\text{O}_4$ : 359.1032; found: 359.1026. FT-IR (neat,  $\text{cm}^{-1}$ )  $\nu$  3347, 2921, 1741, 1683, 1530, 1496, 1066, 753.

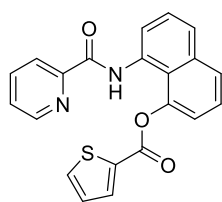

**3ab-20**

8-(Picolinamido)naphthalen-1-yl thiophene-2-carboxylate (**3ab-20**). Following the general procedure, **3ab-20** was obtained as a white solid (66.6 mg, 89%).  $R_f = 0.30$  (n-hexane/EtOAc 3:1). m.p. 180.0–182.0 °C.  $^1\text{H NMR}$  (400 MHz,  $\text{CDCl}_3$ )  $\delta$  11.34 (s, 1H), 8.62 (d,  $J = 7.6$  Hz, 1H), 8.20 (d,  $J = 7.6$  Hz, 1H), 8.00 (d,  $J = 3.6$  Hz, 1H), 7.82 (d,  $J = 8.0$  Hz, 1H), 7.78–7.72 (m, 2H), 7.63 (d,  $J = 4.4$  Hz, 2H), 7.58 (t,  $J = 7.6$  Hz, 1H), 7.49 (t,  $J = 7.6$  Hz, 1H), 7.29–7.24 (m, 1H), 7.22–7.17 (m, 1H), 7.10 (t,  $J = 4.4$  Hz, 1H).  $^{13}\text{C}\{^1\text{H}\}$  NMR (100 MHz,  $\text{CDCl}_3$ )  $\delta$  162.5, 161.1, 149.6, 147.1, 146.5, 137.1, 136.4, 135.2, 133.9, 133.3, 132.1, 127.8, 127.4, 126.4, 125.9, 125.40, 125.36, 122.1, 120.6, 120.3, 120.0. HRMS (ESI):  $m/z$   $[\text{M}+\text{H}]^+$  calcd for  $\text{C}_{21}\text{H}_{15}\text{N}_2\text{O}_3\text{S}$ : 375.0803; found: 375.0798. FT-IR (neat,  $\text{cm}^{-1}$ )  $\nu$  3333, 2917, 1717, 1679, 1490, 1420, 1252, 1218, 736.

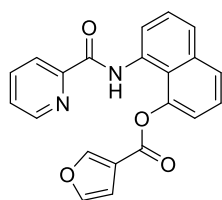

**3ab-22**

8-(Picolinamido)naphthalen-1-yl furan-3-carboxylate (**3ab-22**). Following the general procedure, **3ab-22** was obtained as a white solid (55.5 mg, 72%).  $R_f = 0.30$  (n-hexane/EtOAc 3:1). m.p. 147.0–149.0 °C.  $^1\text{H NMR}$  (400 MHz,  $\text{CDCl}_3$ )  $\delta$  11.25 (s, 1H), 8.60 (d,  $J = 8.0$  Hz, 1H), 8.30–8.21 (m, 2H), 7.95 (d,  $J = 4.4$  Hz, 1H), 7.84–7.78 (m, 2H), 7.75 (d,  $J = 7.8$  Hz, 1H), 7.58 (t,  $J = 8.0$  Hz, 1H), 7.50 (t,  $J = 8.0$  Hz, 1H), 7.42 (t,  $J = 1.6$  Hz, 1H), 7.35–7.30 (m, 1H), 7.24 (dd,  $J = 7.8, 0.8$  Hz, 1H), 6.85 (d,  $J = 1.6$  Hz, 1H).  $^{13}\text{C}\{^1\text{H}\}$  NMR (100 MHz,  $\text{CDCl}_3$ )  $\delta$  162.5, 161.7, 149.8, 149.5, 147.2, 146.2, 143.6, 137.3, 136.4, 132.1, 127.3, 126.4, 126.1, 125.5, 125.4, 122.4, 120.7, 120.3, 120.1, 118.9, 110.4. HRMS (ESI):  $m/z$   $[\text{M}+\text{H}]^+$  calcd for  $\text{C}_{21}\text{H}_{15}\text{N}_2\text{O}_4$ : 359.1032; found: 359.1026. FT-IR (neat,  $\text{cm}^{-1}$ )  $\nu$  3333, 2921, 1735, 1680, 1491, 1428, 1114, 750.

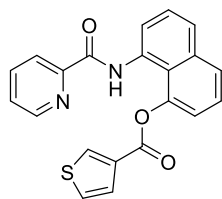

**3ab-24**

8-(picolinamido)naphthalen-1-yl thiophene-3-carboxylate (**3ab-24**). Following the general procedure, **3ab-24** was obtained as a white solid (68.1 mg, 91%).  $R_f = 0.30$  (n-hexane/EtOAc 3:1). m.p. 162.0–164.0 °C.  $^1\text{H NMR}$  (400 MHz,  $\text{CDCl}_3$ )  $\delta$  11.29 (s, 1H), 8.58 (d,  $J = 7.8$  Hz, 1H), 8.32 (d,  $J = 1.6$  Hz, 1H), 8.18 (d,  $J = 8.0$  Hz, 1H), 7.82–7.71 (m, 3H), 7.65 (t,  $J = 4.4$  Hz, 2H), 7.55 (t,  $J = 8.0$  Hz, 1H), 7.47 (t,  $J = 8.0$  Hz, 1H), 7.30–7.26 (m, 1H), 7.24–7.16 (m, 2H).  $^{13}\text{C}\{^1\text{H}\}$  NMR (100 MHz,  $\text{CDCl}_3$ )  $\delta$  162.5, 161.5, 149.6, 147.3, 146.6, 137.1, 136.4, 134.8, 133.0, 132.2, 128.7, 127.3, 126.4, 126.0, 125.9, 125.4, 125.3, 122.2, 120.5, 120.3, 120.0. HRMS (ESI):  $m/z$   $[\text{M}+\text{H}]^+$  calcd for  $\text{C}_{21}\text{H}_{15}\text{N}_2\text{O}_3\text{S}$ : 375.0803; found: 375.0798. FT-IR (neat,  $\text{cm}^{-1}$ )  $\nu$  3328, 2916, 1728, 1678, 1529, 1494, 1238, 1188, 746.

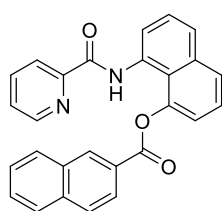

**3ab-29**

8-(Picolinamido)naphthalen-1-yl 2-naphthoate (**3ab-29**). Following the general procedure, **3ab-29** was obtained as a white solid (62.7 mg, 75%).  $R_f = 0.48$  (n-hexane/EtOAc 3:1). m.p. 191.0–193.0 °C.  $^1\text{H NMR}$  (400 MHz,  $\text{CDCl}_3$ )  $\delta$  11.16 (s, 1H), 8.76 (s, 1H), 8.48 (d,  $J = 7.6$  Hz, 1H), 8.17 (d,  $J = 7.6$  Hz, 1H), 8.07 (d,  $J = 7.6$  Hz, 1H), 7.89 (t,  $J = 7.2$  Hz, 2H), 7.83 (t,  $J = 8.0$  Hz, 2H), 7.78 (d,  $J = 8.0$  Hz, 1H), 7.64 (t,  $J = 7.6$  Hz, 1H), 7.60–7.45 (m, 4H), 7.30 (d,  $J = 7.2$  Hz, 1H), 7.09 (d,  $J = 4.4$  Hz, 1H), 6.73–6.65 (m, 1H).  $^{13}\text{C}\{^1\text{H}\}$  NMR (100 MHz,  $\text{CDCl}_3$ )  $\delta$  166.0, 162.6, 149.4, 146.92, 146.89, 136.8, 136.5, 135.6, 132.4, 132.2, 132.0, 129.4, 128.7, 128.1, 127.7, 127.3, 126.9, 126.8, 126.4, 125.8, 125.7, 125.6, 125.4, 122.0, 121.3, 120.8, 120.2. HRMS (ESI):  $m/z$   $[\text{M}+\text{H}]^+$  calcd for  $\text{C}_{27}\text{H}_{19}\text{N}_2\text{O}_3$ : 419.1396; found: 419.1390. FT-IR (neat,  $\text{cm}^{-1}$ )  $\nu$  3349, 2924, 1737, 1684, 1530, 1497, 1217, 1186, 755.

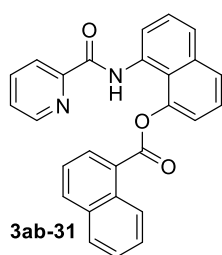

**3ab-31**

8-(Picolinamido)naphthalen-1-yl 1-naphthoate (**3ab-31**). Following the general procedure, **3ab-31** was obtained as a yellow solid (66.8 mg, 80%).  $R_f = 0.48$  (n-hexane/EtOAc 3:1). m.p. 172.0–174.0 °C.  $^1\text{H NMR}$  (400 MHz,  $\text{CDCl}_3$ )  $\delta$  11.28 (s, 1H), 8.77–8.69 (m, 1H), 8.56 (d,  $J = 7.6$  Hz, 1H), 8.52 (d,  $J = 7.2$  Hz, 1H), 7.99 (d,  $J = 8.0$  Hz, 1H), 7.90 (d,  $J = 8.0$  Hz, 1H), 7.85 (d,  $J = 8.0$  Hz, 1H), 7.82–7.75 (m, 2H), 7.61–7.45 (m, 5H), 7.41 (t,  $J = 7.6$  Hz, 1H), 7.35 (dd,  $J = 7.6, 1.2$  Hz, 1H), 6.91 (d,  $J = 4.4$  Hz, 1H), 6.78–6.71 (m, 1H).  $^{13}\text{C}\{^1\text{H}\}$  NMR (100 MHz,  $\text{CDCl}_3$ )  $\delta$  166.1, 162.3, 149.2, 146.7, 146.5, 136.5, 136.4, 134.1, 133.5, 132.2, 131.5, 131.4, 128.22, 128.19, 127.4, 126.5, 126.4, 126.3, 125.54, 125.51, 125.4, 125.3, 124.3, 121.7, 120.7, 120.5, 120.2. HRMS (ESI):  $m/z$   $[\text{M}+\text{H}]^+$  calcd for  $\text{C}_{27}\text{H}_{19}\text{N}_2\text{O}_3$ : 419.1396; found: 419.1390. FT-IR (neat,  $\text{cm}^{-1}$ )  $\nu$  3343, 2917, 1735, 1684, 1530, 1497, 1108, 752.

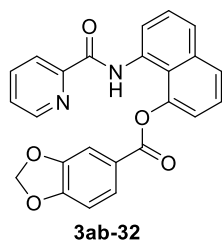

8-(Picolinamido)naphthalen-1-yl benzo[d][1,3]dioxole-5-carboxylate (**3ab-32**). Following the general procedure, **3ab-32** was obtained as a white solid (61.8 mg, 75%).  $R_f = 0.25$  (n-hexane/EtOAc 3:1). m.p. 181.0–183.0 °C.  $^1\text{H}$  NMR (400 MHz,  $\text{CDCl}_3$ )  $\delta$  11.6 (s, 1H), 8.51 (d,  $J = 7.6$  Hz, 1H), 8.18 (d,  $J = 7.6$  Hz, 1H), 7.85–7.73 (m, 5H), 7.61 (d,  $J = 1.6$  Hz, 1H), 7.55 (t,  $J = 8.0$  Hz, 1H), 7.48 (t,  $J = 8.0$  Hz, 1H), 7.25–7.18 (m, 2H), 6.79 (d,  $J = 8.0$  Hz, 1H), 6.04 (s, 2H).  $^{13}\text{C}\{^1\text{H}\}$  NMR (100 MHz,  $\text{CDCl}_3$ )  $\delta$  165.1, 162.5, 152.0, 149.8, 147.5, 147.3, 146.9, 137.1, 136.5, 132.1, 127.2, 126.9, 126.4, 125.8, 125.6, 125.5, 123.6, 122.3, 120.9, 120.6, 120.1, 110.5, 107.9, 101.9. HRMS (ESI):  $m/z$   $[\text{M}+\text{H}]^+$  calcd for  $\text{C}_{24}\text{H}_{17}\text{N}_2\text{O}_5$ : 413.1137; found: 413.1132. FT-IR (neat,  $\text{cm}^{-1}$ )  $\nu$  3340, 2924, 1733, 1684, 1531, 1495, 1258, 1034, 753.

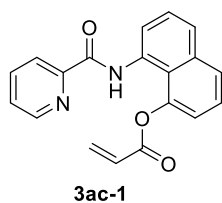

8-(picolinamido)naphthalen-1-yl acrylate (**3ac-1**). Following the general procedure, **3ac-1** was obtained as a white solid (24.8 mg, 39%).  $R_f = 0.48$  (n-hexane/EtOAc 3:1). m.p. 159.0–161.0 °C.  $^1\text{H}$  NMR (400 MHz,  $\text{CDCl}_3$ )  $\delta$  11.48 (s, 1H), 8.73 (d,  $J = 7.6$  Hz, 1H), 8.61 (d,  $J = 4.4$  Hz, 1H), 8.33 (d,  $J = 7.6$  Hz, 1H), 7.91 (dt,  $J = 7.6$ , 1.6 Hz, 1H), 7.78 (d,  $J = 8.0$  Hz, 1H), 7.70 (d,  $J = 8.0$  Hz, 1H), 7.54 (t,  $J = 8.0$  Hz, 1H), 7.51–7.44 (m, 2H), 7.23 (d,  $J = 7.2$  Hz, 1H), 6.60 (d,  $J = 5.2$  Hz, 1H), 6.59 (s, 1H), 5.91 (dd,  $J = 7.6$ , 4.0 Hz, 1H).  $^{13}\text{C}\{^1\text{H}\}$  NMR (100 MHz,  $\text{CDCl}_3$ )  $\delta$  164.8, 162.3, 150.2, 147.6, 145.9, 137.6, 136.4, 132.7, 132.4, 128.0, 127.3, 126.5, 126.4, 125.3, 125.1, 122.8, 120.1, 120.0, 119.4. HRMS (ESI):  $m/z$   $[\text{M}+\text{H}]^+$  calcd for  $\text{C}_{19}\text{H}_{15}\text{N}_2\text{O}_3$ : 319.1083; found: 319.1077. FT-IR (neat,  $\text{cm}^{-1}$ )  $\nu$  3340, 2921, 1745, 1675, 1533, 1497, 1121, 757.

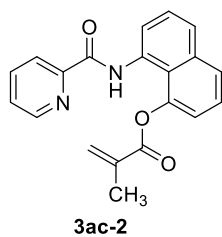

8-(picolinamido)naphthalen-1-yl methacrylate (**3ac-2**). Following the general procedure, **3ac-2** was obtained as a white solid (27.9 mg, 42%).  $R_f = 0.48$  (n-hexane/EtOAc 3:1). m.p. 169.0–171.0 °C.  $^1\text{H}$  NMR (400 MHz,  $\text{CDCl}_3$ )  $\delta$  11.21 (s, 1H), 8.60 (dd,  $J = 8.0$ , 1.2 Hz, 1H), 8.48 (d,  $J = 4.8$  Hz, 1H), 8.30 (dt,  $J = 8.0$ , 1.2 Hz, 1H), 7.88 (dt,  $J = 7.6$ , 1.2 Hz, 1H), 7.77 (dd,  $J = 8.4$ , 1.2 Hz, 1H), 7.72 (dd,  $J = 8.4$ , 1.2 Hz, 1H), 7.54 (t,  $J = 7.6$  Hz, 1H), 7.48–7.42 (m, 2H), 7.13 (dd,  $J = 7.6$ , 1.2 Hz, 1H), 6.42 (s, 1H), 5.70 (t,  $J = 1.2$  Hz, 1H), 1.99 (s, 3H).  $^{13}\text{C}\{^1\text{H}\}$  NMR (100 MHz,  $\text{CDCl}_3$ )  $\delta$  166.5, 162.4, 150.2, 147.4, 146.9, 137.5, 136.4, 135.9, 132.2, 127.9, 127.2, 126.4, 126.3, 125.4, 125.3, 122.5, 120.4, 120.3, 120.0, 18.5. HRMS (ESI):  $m/z$   $[\text{M}+\text{H}]^+$  calcd for  $\text{C}_{20}\text{H}_{17}\text{N}_2\text{O}_3$ : 333.1239; found: 333.1234. FT-IR (neat,  $\text{cm}^{-1}$ )  $\nu$  3324, 2924, 1730, 1675, 1533, 1494, 1104, 759.

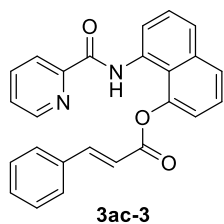

**3ac-3**

8-(picolinamido)naphthalen-1-yl cinnamate (**3ac-3**). Following the general procedure, **3ac-3** was obtained as a yellow solid (63.0 mg, 80%).  $R_f = 0.48$  (n-hexane/EtOAc 3:1). m.p. 131.0–133.0 °C.  $^1\text{H}$  NMR (400 MHz,  $\text{CDCl}_3$ )  $\delta$  11.44 (s, 1H), 8.63 (d,  $J = 7.6$  Hz, 1H), 8.41 (d,  $J = 4.4$  Hz, 1H), 8.28 (d,  $J = 7.6$  Hz, 1H), 7.83–7.70 (m, 4H), 7.55 (t,  $J = 8.0$  Hz, 1H), 7.49 (t,  $J = 8.0$  Hz, 1H), 7.44–7.35 (m, 5H), 7.27 (d,  $J = 8.0$  Hz, 1H), 7.22–7.17 (m, 1H), 6.79 (d,  $J = 15.6$  Hz, 1H).  $^{13}\text{C}\{^1\text{H}\}$  NMR (100 MHz,  $\text{CDCl}_3$ )  $\delta$  165.6, 162.2, 150.1, 147.6, 146.9, 146.2, 137.5, 136.4, 134.0, 132.3, 130.8, 128.9, 128.2, 127.1, 126.4, 126.1, 125.4, 125.3, 122.7, 122.6, 120.2, 119.8, 117.5. HRMS (ESI):  $m/z$   $[\text{M}+\text{H}]^+$  calcd for  $\text{C}_{25}\text{H}_{19}\text{N}_2\text{O}_3$ : 395.1396; found: 395.1390. FT-IR (neat,  $\text{cm}^{-1}$ )  $\nu$  3342, 2925, 1736, 1683, 1530, 1496, 1113, 753.

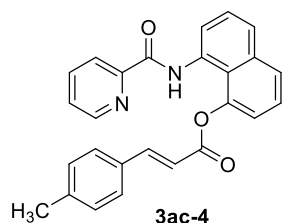

**3ac-4**

8-(picolinamido)naphthalen-1-yl 3-(p-tolyl)acrylate (**3ac-4**). Following the general procedure, **3ac-4** was obtained as a white solid (67.7 mg, 83%).  $R_f = 0.60$  (n-hexane/EtOAc 3:1). m.p. 171.0–173.0 °C.  $^1\text{H}$  NMR (400 MHz,  $\text{CDCl}_3$ )  $\delta$  11.49 (s, 1H), 8.66 (d,  $J = 7.6$  Hz, 1H), 8.41 (d,  $J = 4.4$  Hz, 1H), 8.26 (d,  $J = 8.0$  Hz, 1H), 7.82–7.73 (m, 3H), 7.69 (d,  $J = 8.4$  Hz, 1H), 7.53 (t,  $J = 8.0$  Hz, 1H), 7.47 (t,  $J = 8.0$  Hz, 1H), 7.32 (d,  $J = 8.0$  Hz, 2H), 7.27–7.21 (m, 2H), 7.18 (d,  $J = 8.0$  Hz, 2H), 6.75 (d,  $J = 16.0$  Hz, 1H), 2.39 (s, 3H).  $^{13}\text{C}\{^1\text{H}\}$  NMR (100 MHz,  $\text{CDCl}_3$ )  $\delta$  165.8, 162.3, 150.2, 147.7, 147.0, 146.3, 141.4, 137.5, 136.4, 132.4, 131.3, 129.6, 128.3, 127.0, 126.4, 126.1, 125.4, 125.2, 122.7, 120.2, 119.9, 119.7, 116.4, 21.5. HRMS (ESI):  $m/z$   $[\text{M}+\text{H}]^+$  calcd for  $\text{C}_{26}\text{H}_{21}\text{N}_2\text{O}_3$ : 409.1552; found: 409.1547. FT-IR (neat,  $\text{cm}^{-1}$ )  $\nu$  3343, 2925, 1737, 1684, 1531, 1498, 1110, 753.

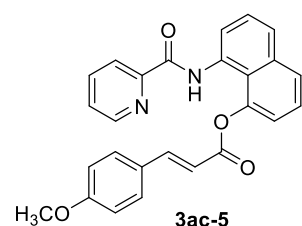

**3ac-5**

8-(picolinamido)naphthalen-1-yl 3-(4-methoxyphenyl)acrylate (**3ac-5**). Following the general procedure, **3ac-5** was obtained as a yellow solid (67.8 mg, 80%).  $R_f = 0.30$  (n-hexane/EtOAc 3:1). m.p. 149.0–151.0 °C.  $^1\text{H}$  NMR (400 MHz,  $\text{CDCl}_3$ )  $\delta$  11.51 (s, 1H), 8.67 (d,  $J = 8.0$  Hz, 1H), 8.42 (d,  $J = 4.8$  Hz, 1H), 8.27 (d,  $J = 7.6$  Hz, 1H), 7.81–7.73 (m, 3H), 7.70 (d,  $J = 8.0$  Hz, 1H), 7.54 (t,  $J = 8.0$  Hz, 1H), 7.48 (t,  $J = 8.0$  Hz, 1H), 7.39 (d,  $J = 8.4$  Hz, 2H), 7.27–7.21 (m, 2H), 6.90 (d,  $J = 8.4$  Hz, 2H), 6.66 (d,  $J = 15.6$  Hz, 1H), 3.86 (s, 3H).  $^{13}\text{C}\{^1\text{H}\}$  NMR (100 MHz,  $\text{CDCl}_3$ )  $\delta$  165.9, 162.3, 161.8, 150.2, 147.7, 146.6, 146.3, 137.4, 136.4, 132.4, 130.0, 127.0, 126.7, 126.4, 126.1, 125.4, 125.1, 122.6, 120.2, 119.9, 119.7, 114.9, 114.3, 55.4. HRMS (ESI):  $m/z$   $[\text{M}+\text{H}]^+$  calcd for  $\text{C}_{26}\text{H}_{21}\text{N}_2\text{O}_4$ : 425.1501; found: 425.1496. FT-IR (neat,  $\text{cm}^{-1}$ )  $\nu$  3341, 2927, 1735, 1684, 1600, 1532, 1510, 1108, 757.

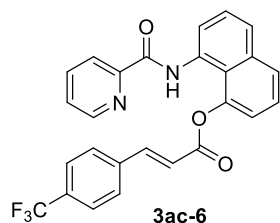

8-(picolinamido)naphthalen-1-yl

3-(4-(trifluoromethyl)phenyl)acrylate (**3ac-6**). Following the general procedure, **3ac-6** was obtained as a white solid (42.5 mg, 46%).  $R_f = 0.70$  (n-hexane/EtOAc 3:1). m.p. 209.0–211.0 °C.  $^1\text{H NMR}$  (400 MHz,  $\text{CDCl}_3$ )  $\delta$  11.30 (s, 1H), 8.59 (d,  $J = 7.6$  Hz, 1H), 8.41 (d,  $J = 4.8$  Hz, 1H), 8.29 (d,  $J = 7.6$  Hz, 1H), 7.82–7.71 (m, 4H), 7.63 (d,  $J = 8.0$  Hz, 2H), 7.55 (t,  $J = 8.0$  Hz, 1H), 7.52–7.46 (m, 3H), 7.27 (d,  $J = 8.0$  Hz, 1H), 7.25–7.21 (m, 1H), 6.84 (d,  $J = 16.0$  Hz, 1H).  $^{13}\text{C}\{^1\text{H}\}$  NMR (100 MHz,  $\text{CDCl}_3$ )  $\delta$  165.0, 162.2, 150.2, 147.6, 146.0, 144.8, 137.6, 137.4, 137.3, 136.5, 132.2 (q,  $J_{\text{C-F}} = 32.5$  Hz), 132.1, 128.3, 127.3, 126.5, 126.1, 125.8 (q,  $J_{\text{C-F}} = 3.8$  Hz), 125.5, 125.4, 123.7 (q,  $J_{\text{C-F}} = 270.5$  Hz), 122.8, 120.6, 120.2, 119.8.  $^{19}\text{F NMR}$  (376 MHz,  $\text{CDCl}_3$ )  $\delta$  -62.9. HRMS (ESI):  $m/z$   $[\text{M}+\text{H}]^+$  calcd for  $\text{C}_{26}\text{H}_{18}\text{F}_3\text{N}_2\text{O}_3$ : 463.1270; found: 463.1264. FT-IR (neat,  $\text{cm}^{-1}$ )  $\nu$  3350, 2922, 1737, 1683, 1532, 1500, 1324, 1114, 750.

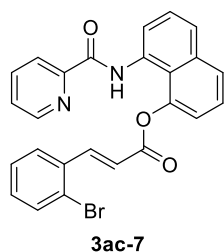

8-(picolinamido)naphthalen-1-yl

3-(2-bromophenyl)acrylate

(**3ac-7**). Following the general procedure, **3ac-7** was obtained as a yellow solid (62.3 mg, 66%).  $R_f = 0.48$  (n-hexane/EtOAc 3:1). m.p. 151.0–153.0 °C.  $^1\text{H NMR}$  (400 MHz,  $\text{CDCl}_3$ )  $\delta$  11.35 (s, 1H), 8.61 (d,  $J = 7.6$  Hz, 1H), 8.38 (d,  $J = 4.4$  Hz, 1H), 8.30 (d,  $J = 7.6$  Hz, 1H), 8.15 (d,  $J = 15.6$  Hz, 1H), 7.82–7.71 (m, 3H), 7.64–7.59 (m, 1H), 7.55 (t,  $J = 8.0$  Hz, 1H), 7.49 (t,  $J = 8.0$  Hz, 1H), 7.39–7.34 (m, 1H), 7.31–7.25 (m, 3H), 7.21–7.15 (m, 1H), 6.73 (d,  $J = 16.0$  Hz, 1H).  $^{13}\text{C}\{^1\text{H}\}$  NMR (100 MHz,  $\text{CDCl}_3$ )  $\delta$  164.9, 162.3, 150.2, 147.6, 146.1, 145.1, 137.5, 136.4, 134.1, 133.6, 132.2, 131.6, 127.7, 127.6, 127.2, 126.4, 126.0, 125.6, 125.37, 125.36, 122.8, 120.4, 120.3, 120.2, 119.8. HRMS (ESI):  $m/z$   $[\text{M}+\text{H}]^+$  calcd for  $\text{C}_{25}\text{H}_{18}\text{BrN}_2\text{O}_3$ : 473.0501; found: 473.0495. FT-IR (neat,  $\text{cm}^{-1}$ )  $\nu$  3341, 2922, 1735, 1680, 1527, 1494, 1114, 750.

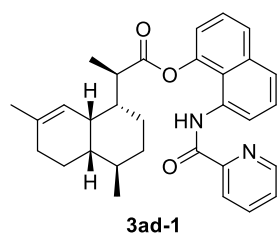

8-(picolinamido)naphthalen-1-yl

(**3ad-1**). Following the general procedure, **3ad-1** was obtained as a white solid (74.2 mg, 77%).  $R_f = 0.84$  (n-hexane/EtOAc 3:1). m.p. 154.0–156.0 °C.  $^1\text{H NMR}$  (400 MHz,  $\text{CDCl}_3$ )  $\delta$  11.6 (s, 1H), 8.79 (d,  $J = 7.6$  Hz, 1H), 8.77 (d,  $J = 4.4$  Hz, 1H), 8.38 (d,  $J = 7.6$  Hz, 1H), 7.95 (dt,  $J = 7.6, 1.2$  Hz, 1H), 7.75 (d,  $J = 7.6$  Hz, 1H), 7.67 (d,  $J = 8.0$  Hz, 1H), 7.57–7.49 (m, 2H), 7.46 (t,  $J = 8.0$  Hz, 1H), 7.20 (dd,  $J = 7.6, 0.8$  Hz, 1H), 5.03 (s, 1H), 3.16–3.06 (m, 1H), 2.45 (s, 1H), 1.97–1.72 (m, 4H), 1.68 (s, 3H), 1.58–1.44 (m, 3H), 1.38–1.29 (m, 1H), 1.24–1.19 (m, 1H), 1.09 (d,  $J = 7.2$  Hz, 3H), 0.97–0.87 (m, 2H), 0.84 (d,  $J = 6.4$  Hz, 3H).  $^{13}\text{C}\{^1\text{H}\}$  NMR (100 MHz,  $\text{CDCl}_3$ )  $\delta$  176.3, 162.1, 150.6, 147.8, 145.8, 137.8, 136.4, 136.0, 132.6, 127.0, 126.5, 126.4, 125.2, 124.8, 123.0, 120.5, 119.5, 119.2, 119.0, 44.1, 41.8, 41.5, 36.5, 35.1, 27.6, 27.4, 26.5, 25.6, 23.9, 19.6, 15.0. HRMS (ESI):  $m/z$   $[\text{M}+\text{H}]^+$



calcd for C<sub>31</sub>H<sub>35</sub>N<sub>2</sub>O<sub>3</sub>: 483.2648; found: 483.2642. FT-IR (neat, cm<sup>-1</sup>)  $\nu$  3342, 2918, 1764, 1686, 1532, 1498, 1105, 1040, 753.

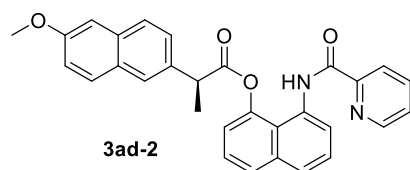

8-(picolinamido)naphthalen-1-yl  
(*S*)-2-(6-methoxynaphthalen-2-yl)propanoate  
(**3ad-2**). Following the general procedure, **3ad-2** was obtained as a white solid (87.6 mg, 92%).  $R_f$  = 0.50 (n-hexane/EtOAc 3:1). m.p. 146.0–148.0 °C.

<sup>1</sup>H NMR (400 MHz, CDCl<sub>3</sub>)  $\delta$  11.58 (s, 1H), 8.84–8.71 (m, 2H), 8.41 (d,  $J$  = 7.6 Hz, 1H), 7.97 (dt,  $J$  = 7.6, 1.6 Hz, 1H), 7.79–7.64 (m, 5H), 7.59–7.51 (m, 3H), 7.31 (t,  $J$  = 8.0 Hz, 1H), 7.21–7.12 (m, 2H), 6.77 (dd,  $J$  = 7.6, 1.2 Hz, 1H), 4.67 (q,  $J$  = 7.2 Hz, 1H), 3.93 (s, 3H), 1.53 (d,  $J$  = 7.2 Hz, 3H). <sup>13</sup>C{<sup>1</sup>H} NMR (100 MHz, CDCl<sub>3</sub>)  $\delta$  173.4, 162.2, 157.8, 150.5, 147.6, 146.3, 137.9, 136.3, 134.6, 133.9, 132.4, 129.3, 129.0, 127.5, 127.1, 126.7, 126.4, 126.2, 126.1, 125.2, 125.0, 123.1, 119.7, 119.5, 119.3, 119.2, 105.6, 55.3, 45.1, 18.0. HRMS (ESI):  $m/z$  [M+H]<sup>+</sup> calcd for C<sub>30</sub>H<sub>25</sub>N<sub>2</sub>O<sub>4</sub>: 477.1814; found: 477.1809. FT-IR (neat, cm<sup>-1</sup>)  $\nu$  3355, 2933, 1763, 1685, 1531, 1497, 1109, 753.

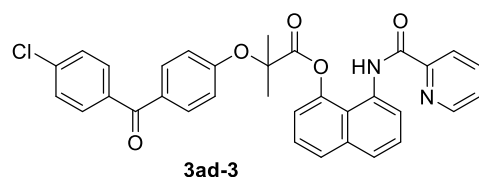

8-(picolinamido)naphthalen-1-yl  
2-(4-(4-chlorobenzoyl)phenoxy)-2-methylpropionate (**3ad-3**). Following the general procedure, **3ad-3** was obtained as a yellow solid (83.5 mg, 74%).  $R_f$  = 0.48

(n-hexane/EtOAc 3:1). m.p. 163.0–165.0 °C. <sup>1</sup>H NMR (400 MHz, CDCl<sub>3</sub>)  $\delta$  10.82 (s, 1H), 8.67 (d,  $J$  = 4.4 Hz, 1H), 8.51 (d,  $J$  = 7.6 Hz, 1H), 8.27 (d,  $J$  = 7.6 Hz, 1H), 7.91 (t,  $J$  = 7.6 Hz, 1H), 7.79 (d,  $J$  = 8.0 Hz, 1H), 7.72–7.65 (m, 5H), 7.55–7.43 (m, 5H), 7.14 (d,  $J$  = 7.2 Hz, 1H), 6.86 (d,  $J$  = 8.8 Hz, 2H), 1.68 (s, 6H). <sup>13</sup>C{<sup>1</sup>H} NMR (100 MHz, CDCl<sub>3</sub>)  $\delta$  194.2, 172.8, 162.6, 159.0, 150.1, 147.9, 146.0, 138.5, 137.7, 136.5, 136.2, 132.0, 131.9, 131.2, 131.1, 128.6, 127.6, 126.6, 126.5, 125.5, 125.2, 122.9, 120.4, 120.2, 120.0, 118.5, 79.9, 25.2. HRMS (ESI):  $m/z$  [M-H]<sup>-</sup> calcd for C<sub>33</sub>H<sub>24</sub>ClN<sub>2</sub>O<sub>5</sub>: 563.1374; found: 563.1379. FT-IR (neat, cm<sup>-1</sup>)  $\nu$  3341, 2923, 1737, 1652, 1594, 1543, 1504, 1251, 1145, 758.

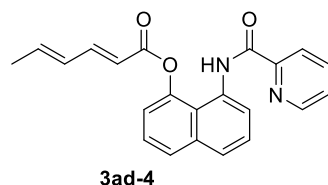

8-(Picolinamido)naphthalen-1-yl (*2E*, *4E*)-hexa-2,4-dienoate (**3ad-4**). Following the general procedure, **3ad-4** was obtained as a yellow solid (27.2 mg, 38%).  $R_f$  = 0.50 (n-hexane/EtOAc 3:1). m.p. 145.0–147.0 °C. <sup>1</sup>H NMR (400 MHz, CDCl<sub>3</sub>)  $\delta$  11.56 (s, 1H), 8.74 (d,  $J$

= 7.6 Hz, 1H), 8.56 (d,  $J$  = 4.0 Hz, 1H), 8.31 (d,  $J$  = 7.6 Hz, 1H), 7.87 (t,  $J$  = 7.6 Hz, 1H), 7.75 (d,  $J$  = 8.0 Hz, 1H), 7.68 (d,  $J$  = 8.0 Hz, 1H), 7.53 (t,  $J$  = 8.0 Hz, 1H), 7.48–7.36 (m, 3H), 7.21 (d,  $J$  = 7.6 Hz, 1H), 6.26–6.10 (m, 3H), 1.87 (d,  $J$  = 4.8 Hz, 3H). <sup>13</sup>C{<sup>1</sup>H} NMR (100 MHz, CDCl<sub>3</sub>)  $\delta$  165.9, 162.3, 150.3, 147.6, 147.3, 146.3,

141.3, 137.5, 136.4, 132.6, 129.4, 126.9, 126.4, 126.2, 125.3, 125.0, 122.7, 120.1, 119.50, 119.46, 118.4, 18.8. HRMS (ESI):  $m/z$   $[M+H]^+$  calcd for  $C_{22}H_{19}N_2O_3$ : 359.1396; found: 359.1390. FT-IR (neat,  $cm^{-1}$ )  $\nu$  3332, 2923, 1724, 1677, 1526, 1494, 1111, 1000, 740.

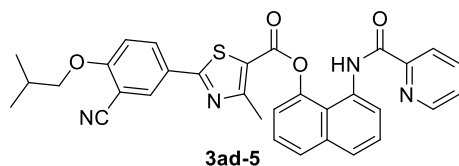

8-(Picolinamido)naphthalen-1-yl

2-(3-cyano-4-isobutoxyphenyl)-4-methylthiazole-5-carboxylate (**3ad-5**). Following the general procedure, **3ad-5** was obtained as a yellow solid (30.7 mg, 28%).  $R_f = 0.23$  (n-hexane/EtOAc 3:1). m.p. 190.0–192.0 °C.  $^1H$  NMR (400 MHz, DMSO- $d_6$ )  $\delta$  10.7 (s, 1H), 8.19 (d,  $J = 2.4$  Hz, 1H), 8.10 (dd,  $J = 8.8, 2.4$  Hz, 1H), 8.08–8.04 (m, 1H), 8.02–7.94 (m, 3H), 7.87 (d,  $J = 7.2$  Hz, 1H), 7.78 (dt,  $J = 7.8, 1.6$  Hz, 1H), 7.65–7.56 (m, 2H), 7.14 (dd,  $J = 7.2, 1.2$  Hz, 1H), 7.37 (d,  $J = 8.8, 1H$ ), 7.26–7.21 (m, 1H), 4.02 (d,  $J = 6.8$  Hz, 2H), 2.55 (s, 3H), 2.16–2.06 (m, 1H), 1.04 (d,  $J = 6.8$  Hz, 6H).  $^{13}C\{^1H\}$  NMR (100 MHz, DMSO- $d_6$ )  $\delta$  168.1, 163.0, 162.7, 162.1, 160.8, 149.6, 147.9, 145.9, 138.0, 136.4, 133.7, 132.1, 132.0, 128.0, 127.1, 126.8, 126.7, 126.3, 125.4, 125.0, 122.6, 122.3, 121.3, 121.2, 115.8, 114.4, 102.1, 75.6, 28.1, 19.2, 17.8. HRMS (ESI):  $m/z$   $[M+H]^+$  calcd for  $C_{32}H_{27}N_4O_4S$ : 563.1753; found: 563.1748. FT-IR (neat,  $cm^{-1}$ )  $\nu$  3356, 2928, 1731, 1686, 1531, 1500, 1430, 1289, 1246, 1030, 753.

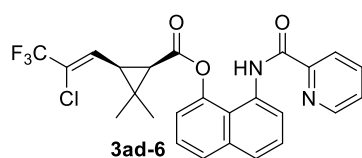

8-(picolinamido)naphthalen-1-yl

(1R,3R)-3-((Z)-2-chloro-3,3,3-trifluoroprop-1-en-1-yl)-2,2-dimethylcyclopropane-1-carboxylate (**3ad-6**).

Following the general procedure, **3ad-6** was obtained as a white solid (76.1 mg, 78%).  $R_f = 0.64$  (n-hexane/EtOAc 3:1). m.p. 123.0–125.0 °C.  $^1H$  NMR (400 MHz,  $CDCl_3$ )  $\delta$  11.46 (s, 1H), 8.69 (d,  $J = 7.6$  Hz, 1H), 8.64 (d,  $J = 4.4$  Hz, 1H), 8.40 (d,  $J = 7.6$  Hz, 1H), 7.96 (t,  $J = 7.6$  Hz, 1H), 7.78 (d,  $J = 8.4$  Hz, 1H), 7.70 (d,  $J = 8.4$  Hz, 1H), 7.57–7.51 (m, 2H), 7.47 (t,  $J = 8.4$  Hz, 1H), 7.18 (d,  $J = 7.6$  Hz, 1H), 6.76 (d,  $J = 9.2$  Hz, 1H), 2.57 (d,  $J = 8.0$  Hz, 1H), 1.96 (t,  $J = 8.4$  Hz, 1H), 1.22 (s, 3H), 1.04 (s, 3H).  $^{13}C\{^1H\}$  NMR (100 MHz,  $CDCl_3$ )  $\delta$  168.9, 161.9, 150.3, 147.7, 145.6, 137.9, 136.4, 132.3, 128.9 (q,  $J_{C-F} = 4.4$  Hz), 127.3, 126.6, 126.5, 125.2, 125.1, 123.1, 122.4 (q,  $J_{C-F} = 37.6$  Hz), 120.6, 120.1 (q,  $J_{C-F} = 269.8$  Hz), 119.7, 119.4, 32.6, 31.8, 29.9, 27.9, 14.6.  $^{19}F$  NMR (376 MHz,  $CDCl_3$ )  $\delta$  -68.8. HRMS (ESI):  $m/z$   $[M+H]^+$  calcd for  $C_{25}H_{21}ClF_3N_2O_3$ : 489.1193; found: 489.1187. FT-IR (neat,  $cm^{-1}$ )  $\nu$  3348, 2932, 1751, 1687, 1532, 1499, 1275, 1115, 1059, 753.

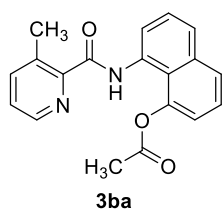

8-(3-methylpicolinamido)naphthalen-1-yl acetate (**3ba**). Following the general procedure, **3ba** was obtained as a white solid (31.4 mg, 49%).  $R_f = 0.50$  (n-hexane/EtOAc 3:1). m.p. 147.0–149.0 °C.  $^1H$

NMR (400 MHz, CDCl<sub>3</sub>)  $\delta$  11.49 (s, 1H), 8.65 (d,  $J$  = 7.6 Hz, 1H), 8.50 (d,  $J$  = 4.0 Hz, 1H), 7.75 (d,  $J$  = 8.0 Hz, 1H), 7.67 (d,  $J$  = 8.0 Hz, 2H), 7.52 (t,  $J$  = 8.0 Hz, 1H), 7.45 (t,  $J$  = 8.0 Hz, 1H), 7.39 (dd,  $J$  = 7.6, 4.8 Hz, 1H), 7.17 (dd,  $J$  = 7.6, 0.8 Hz, 1H), 2.85 (s, 3H), 2.33 (s, 3H). <sup>13</sup>C{<sup>1</sup>H} NMR (100 MHz, CDCl<sub>3</sub>)  $\delta$  169.5, 163.8, 147.4, 145.9, 145.1, 141.4, 136.5, 136.4, 132.6, 127.2, 126.4, 126.1, 125.2, 124.9, 120.3, 119.63, 119.57, 21.5, 21.0. HRMS (ESI):  $m/z$  [M+H]<sup>+</sup> calcd for C<sub>19</sub>H<sub>17</sub>N<sub>2</sub>O<sub>3</sub>: 321.1239; found: 321.1234. FT-IR (neat, cm<sup>-1</sup>)  $\nu$  3346, 2924, 1769, 1682, 1524, 1494, 1430, 1081, 759.

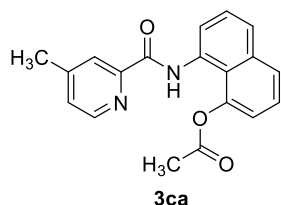

8-(4-methylpicolinamido)naphthalen-1-yl acetate (**3ca**). Following the general procedure, **3ca** was obtained as a white solid (39.7 mg, 62%).  $R_f$  = 0.48 (n-hexane/EtOAc 3:1). m.p. 159.0–161.0 °C. <sup>1</sup>H NMR (400 MHz, CDCl<sub>3</sub>)  $\delta$  11.51 (s, 1H), 8.76 (dd,  $J$  = 8.0, 0.8 Hz, 1H), 8.49 (d,  $J$  = 4.8 Hz, 1H), 8.19 (s, 1H), 7.75 (d,  $J$  = 8.0 Hz, 1H), 7.68 (d,  $J$  = 8.0 Hz, 1H), 7.53 (t,  $J$  = 8.0 Hz, 1H), 7.45 (t,  $J$  = 8.0 Hz, 1H), 7.31 (d,  $J$  = 4.8 Hz, 1H), 7.19 (dd,  $J$  = 7.6, 1.2 Hz, 1H), 2.48 (s, 3H), 2.45 (s, 3H). <sup>13</sup>C{<sup>1</sup>H} NMR (100 MHz, CDCl<sub>3</sub>)  $\delta$  169.6, 162.5, 150.0, 149.3, 147.4, 145.9, 136.4, 132.5, 127.4, 127.2, 126.4, 125.2, 124.9, 123.7, 120.4, 119.4, 119.2, 21.6, 21.2. HRMS (ESI):  $m/z$  [M+H]<sup>+</sup> calcd for C<sub>19</sub>H<sub>17</sub>N<sub>2</sub>O<sub>3</sub>: 321.1239; found: 321.1234. FT-IR (neat, cm<sup>-1</sup>)  $\nu$  3337, 2934, 1763, 1671, 1528, 1496, 1432, 1179, 1024, 759.

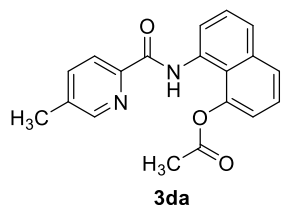

8-(5-methylpicolinamido)naphthalen-1-yl acetate (**3da**). Following the general procedure, **3da** was obtained as a white solid (46.7 mg, 73%).  $R_f$  = 0.46 (n-hexane/EtOAc 3:1). m.p. 155.0–157.0 °C. <sup>1</sup>H NMR (400 MHz, CDCl<sub>3</sub>)  $\delta$  11.46 (s, 1H), 8.77 (d,  $J$  = 7.6 Hz, 1H), 8.45 (s, 1H), 8.25 (d,  $J$  = 8.0 Hz, 1H), 7.75 (d,  $J$  = 8.0 Hz, 1H), 7.72 (dd,  $J$  = 8.0, 1.2 Hz, 1H), 7.67 (d,  $J$  = 8.0 Hz, 1H), 7.52 (t,  $J$  = 8.0 Hz, 1H), 7.45 (t,  $J$  = 8.0 Hz, 1H), 7.19 (d,  $J$  = 7.6 Hz, 1H), 2.46 (s, 3H), 2.44 (s, 3H). <sup>13</sup>C{<sup>1</sup>H} NMR (100 MHz, CDCl<sub>3</sub>)  $\delta$  169.6, 162.5, 148.1, 147.9, 145.9, 138.1, 136.9, 136.4, 132.6, 127.2, 126.4, 125.2, 124.9, 122.5, 120.3, 119.3, 119.1, 21.7, 18.6. HRMS (ESI):  $m/z$  [M+H]<sup>+</sup> calcd for C<sub>19</sub>H<sub>17</sub>N<sub>2</sub>O<sub>3</sub>: 321.1239; found: 321.1234. FT-IR (neat, cm<sup>-1</sup>)  $\nu$  3331, 2922, 1766, 1673, 1530, 1499, 1185, 757.

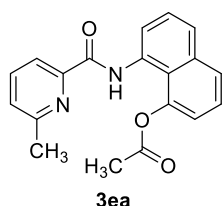

8-(6-methylpicolinamido)naphthalen-1-yl acetate (**3ea**). Following the general procedure, **3ea** was obtained as a gray solid (14.7 mg, 23%).  $R_f$  = 0.46 (n-hexane/EtOAc 3:1). m.p. 168.0–170.0 °C. <sup>1</sup>H NMR (400 MHz, CDCl<sub>3</sub>)  $\delta$  11.19 (s, 1H), 8.53 (d,  $J$  = 7.6 Hz, 1H), 8.19 (d,  $J$  = 7.6 Hz, 1H), 7.83 (t,  $J$  = 7.6 Hz, 1H), 7.78 (d,  $J$  = 7.6 Hz, 1H), 7.70 (d,  $J$  = 8.0 Hz, 1H), 7.53 (t,  $J$  = 8.0 Hz, 1H), 7.47 (t,  $J$  = 8.0 Hz, 1H), 7.38 (d,  $J$  = 7.6 Hz, 1H), 7.19 (dd,  $J$  = 7.2, 0.8 Hz, 1H), 2.69 (s, 3H),

2.22 (s, 3H).  $^{13}\text{C}\{^1\text{H}\}$  NMR (100 MHz,  $\text{CDCl}_3$ )  $\delta$  169.4, 162.5, 157.0, 149.6, 145.8, 138.0, 136.4, 132.0, 127.3, 126.4, 125.4, 125.3, 120.6, 120.5, 120.2, 120.0, 24.2, 21.2. HRMS (ESI):  $m/z$   $[\text{M}+\text{H}]^+$  calcd for  $\text{C}_{19}\text{H}_{17}\text{N}_2\text{O}_3$ : 321.1239; found: 321.1234. FT-IR (neat,  $\text{cm}^{-1}$ )  $\nu$  3362, 2924, 1772, 1687, 1530, 1497, 1179, 746.

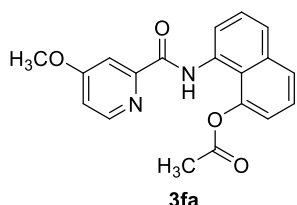

8-(4-methoxypicolinamido)naphthalen-1-yl acetate (**3fa**).

Following the general procedure, **3fa** was obtained as a yellow solid (52.4 mg, 78%).  $R_f$  = 0.40 (n-hexane/EtOAc 3:1). m.p. 157.0–159.0 °C.  $^1\text{H}$  NMR (400 MHz,  $\text{CDCl}_3$ )  $\delta$  11.53 (s, 1H), 8.75 (dd,  $J$  = 8.0, 1.2 Hz, 1H), 8.43 (d,  $J$  = 5.6 Hz, 1H), 7.90 (d,  $J$  = 2.8 Hz, 1H), 7.76 (dd,  $J$  = 8.0, 0.8 Hz, 1H), 7.68 (d,  $J$  = 8.0, 0.8 Hz, 1H), 7.53 (t,  $J$  = 8.0 Hz, 1H), 7.45 (t,  $J$  = 8.0 Hz, 1H), 7.19 (dd,  $J$  = 7.6, 1.2 Hz, 1H), 7.00 (dd,  $J$  = 5.6, 2.8 Hz, 1H), 3.95 (s, 3H), 2.45 (s, 3H).  $^{13}\text{C}\{^1\text{H}\}$  NMR (100 MHz,  $\text{CDCl}_3$ )  $\delta$  169.6, 167.3, 162.2, 152.3, 148.8, 145.9, 136.4, 132.4, 127.2, 126.4, 125.2, 125.0, 120.4, 119.4, 119.2, 113.4, 107.9, 55.6, 21.7. HRMS (ESI):  $m/z$   $[\text{M}+\text{H}]^+$  calcd for  $\text{C}_{19}\text{H}_{17}\text{N}_2\text{O}_4$ : 337.1188; found: 337.1183. FT-IR (neat,  $\text{cm}^{-1}$ )  $\nu$  3342, 2927, 1772, 1682, 1529, 1496, 1180, 1030, 758.

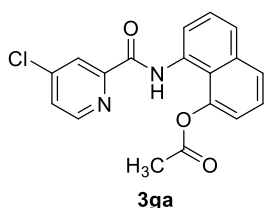

8-(4-chloropicolinamido)naphthalen-1-yl acetate (**3ga**).

Following the general procedure, **3ga** was obtained as a yellow solid (48.3 mg, 71%).  $R_f$  = 0.72 (n-hexane/EtOAc 3:1). m.p. 184.0–186.0 °C.  $^1\text{H}$  NMR (400 MHz,  $\text{CDCl}_3$ )  $\delta$  11.44 (s, 1H), 8.75 (d,  $J$  = 7.6 Hz, 1H), 8.53 (d,  $J$  = 5.2 Hz, 1H), 8.37 (d,  $J$  = 2.0 Hz, 1H), 7.76 (d,  $J$  = 8.0 Hz, 1H), 7.69 (d,  $J$  = 8.0 Hz, 1H), 7.55–7.50 (m, 2H), 7.46 (t,  $J$  = 8.0 Hz, 1H), 7.20 (dd,  $J$  = 7.6, 0.8 Hz, 1H), 2.44 (s, 3H).  $^{13}\text{C}\{^1\text{H}\}$  NMR (100 MHz,  $\text{CDCl}_3$ )  $\delta$  169.4, 161.1, 151.8, 148.6, 146.5, 145.8, 136.4, 132.2, 127.3, 126.8, 126.5, 125.4, 125.3, 123.6, 120.5, 119.5, 119.1, 21.7. HRMS (ESI):  $m/z$   $[\text{M}+\text{H}]^+$  calcd for  $\text{C}_{18}\text{H}_{14}\text{ClN}_2\text{O}_3$ : 341.0693; found: 341.0687. FT-IR (neat,  $\text{cm}^{-1}$ )  $\nu$  3350, 2930, 1763, 1672, 1542, 1501, 1194, 1027, 754.

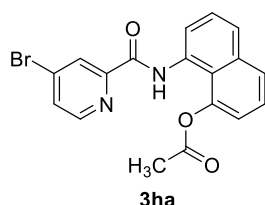

8-(4-bromopicolinamido)naphthalen-1-yl acetate (**3ha**).

Following the general procedure, **3ha** was obtained as a yellow solid (55.4 mg, 72%).  $R_f$  = 0.72 (n-hexane/EtOAc 3:1). m.p. 178.0–180.0 °C.  $^1\text{H}$  NMR (400 MHz,  $\text{CDCl}_3$ )  $\delta$  11.42 (s, 1H), 8.74 (d,  $J$  = 7.6 Hz, 1H), 8.53 (d,  $J$  = 1.6 Hz, 1H), 8.44 (d,  $J$  = 4.8 Hz, 1H), 7.76 (d,  $J$  = 8.4 Hz, 1H), 7.71–7.65 (m, 2H), 7.53 (t,  $J$  = 8.0 Hz, 1H), 7.46 (t,  $J$  = 8.0 Hz, 1H), 7.19 (d,  $J$  = 7.6 Hz, 1H), 2.44 (s, 3H).  $^{13}\text{C}\{^1\text{H}\}$  NMR (100 MHz,  $\text{CDCl}_3$ )  $\delta$  169.4, 160.9, 151.4, 148.3, 145.7, 136.3, 135.0, 132.1, 129.8, 127.2, 126.6, 126.4, 125.32, 125.30, 120.5, 119.5, 119.0, 21.7. HRMS (ESI):  $m/z$   $[\text{M}+\text{H}]^+$  calcd for  $\text{C}_{18}\text{H}_{14}\text{BrN}_2\text{O}_3$ : 385.0188; found: 385.0182. FT-IR (neat,  $\text{cm}^{-1}$ )  $\nu$  3346, 2952, 1759, 1668, 1538, 1497, 1189, 1024, 753.

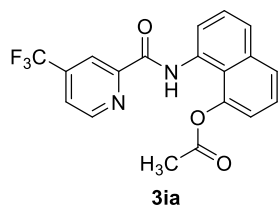

8-(4-(trifluoromethyl)picolinamido)naphthalen-1-yl acetate (**3ia**). Following the general procedure, **3ia** was obtained as a gray solid (53.2 mg, 78%).  $R_f = 0.75$  (n-hexane/EtOAc 3:1). m.p. 170.0–172.0 °C.  $^1\text{H NMR}$  (400 MHz,  $\text{CDCl}_3$ )  $\delta$  11.47 (s, 1H), 8.84–8.80 (m, 1H), 8.78 (dd,  $J = 8.0, 1.2$  Hz, 1H), 6.62 (s, 1H), 7.78–7.73 (m, 2H), 7.70 (d,  $J = 8.0$  Hz, 1H), 7.54 (t,  $J = 8.0$  Hz, 1H), 7.47 (t,  $J = 8.0$  Hz, 1H), 7.21 (d,  $J = 7.6$  Hz, 1H), 2.45 (s, 3H).  $^{13}\text{C}\{^1\text{H}\}$  NMR (100 MHz,  $\text{CDCl}_3$ )  $\delta$  169.3, 160.8, 151.9, 148.7, 145.7, 140.4 (q,  $J = 34.8$  Hz), 136.4, 132.0, 127.3, 126.4, 125.45, 125.36, 122.4 (q,  $J = 271.9$  Hz), 122.2 (q,  $J = 3.4$  Hz), 125.5, 119.5, 119.1 (q,  $J = 3.5$  Hz), 119.0, 21.7.  $^{19}\text{F NMR}$  (376 MHz,  $\text{CDCl}_3$ )  $\delta$  -64.8. HRMS (ESI):  $m/z$   $[\text{M}+\text{H}]^+$  calcd for  $\text{C}_{19}\text{H}_{14}\text{F}_3\text{N}_2\text{O}_3$ : 375.0957; found: 375.0951. FT-IR (neat,  $\text{cm}^{-1}$ )  $\nu$  3348, 2924, 1774, 1685, 1534, 1501, 1408, 1330, 1174, 1139, 757.

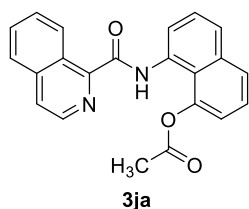

8-(isoquinoline-1-carboxamido)naphthalen-1-yl acetate (**3ja**). Following the general procedure, **3ja** was obtained as a yellow solid (62.7 mg, 88%).  $R_f = 0.70$  (n-hexane/EtOAc 3:1). m.p. 159.0–161.0 °C.  $^1\text{H NMR}$  (400 MHz,  $\text{CDCl}_3$ )  $\delta$  11.64 (s, 1H), 9.80–9.70 (m, 1H), 8.73 (dd,  $J = 8.0, 1.2$  Hz, 1H), 8.58 (d,  $J = 5.6$  Hz, 1H), 7.94–7.87 (m, 2H), 7.80–7.69 (m, 4H), 7.57 (t,  $J = 8.0$  Hz, 1H), 7.47 (t,  $J = 8.0$  Hz, 1H), 7.20 (dd,  $J = 7.8, 1.2$  Hz, 1H), 2.30 (s, 3H).  $^{13}\text{C}\{^1\text{H}\}$  NMR (100 MHz,  $\text{CDCl}_3$ )  $\delta$  169.5, 163.9, 148.2, 145.9, 139.6, 137.6, 136.4, 132.5, 130.8, 129.1, 127.9, 127.33, 127.25, 127.0, 126.4, 125.3, 125.15, 125.08, 120.4, 119.8, 119.6, 21.5. HRMS (ESI):  $m/z$   $[\text{M}+\text{H}]^+$  calcd for  $\text{C}_{22}\text{H}_{17}\text{N}_2\text{O}_3$ : 357.1239; found: 357.1234. FT-IR (neat,  $\text{cm}^{-1}$ )  $\nu$  3338, 2928, 1768, 1676, 1524, 1491, 1181, 754.

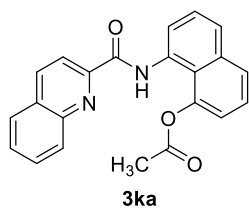

8-(quinoline-2-carboxamido)naphthalen-1-yl acetate (**3ka**). Following the general procedure, **3ka** was obtained as a white solid (14.2 mg, 20%).  $R_f = 0.68$  (n-hexane/EtOAc 3:1). m.p. 184.0–186.0 °C.  $^1\text{H NMR}$  (400 MHz,  $\text{CDCl}_3$ )  $\delta$  11.51 (s, 1H), 8.66 (d,  $J = 7.6$  Hz, 1H), 8.49 (d,  $J = 8.4$  Hz, 1H), 8.42 (d,  $J = 8.4$  Hz, 1H), 8.26 (d,  $J = 8.4$  Hz, 1H), 7.96 (d,  $J = 8.4$  Hz, 1H), 7.87–7.82 (m, 1H), 7.80 (d,  $J = 8.0$  Hz, 1H), 7.73–7.66 (m, 2H), 7.56 (t,  $J = 8.0$  Hz, 1H), 7.49 (t,  $J = 8.0$  Hz, 1H), 7.22 (dd,  $J = 7.2, 0.8$  Hz, 1H), 2.21 (s, 3H).  $^{13}\text{C}\{^1\text{H}\}$  NMR (100 MHz,  $\text{CDCl}_3$ )  $\delta$  169.5, 162.3, 150.2, 146.1, 145.9, 138.0, 136.4, 132.2, 130.6, 129.5, 129.4, 128.2, 128.1, 127.3, 126.5, 125.4, 125.3, 120.6, 120.2, 119.8, 119.2, 21.5. HRMS (ESI):  $m/z$   $[\text{M}+\text{H}]^+$  calcd for  $\text{C}_{22}\text{H}_{17}\text{N}_2\text{O}_3$ : 357.1239; found: 357.1234. FT-IR (neat,  $\text{cm}^{-1}$ )  $\nu$  3325, 2924, 1768, 1682, 1529, 1493, 1184, 758.

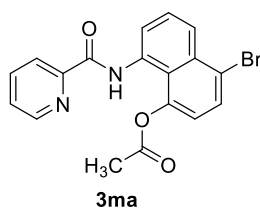

4-bromo-8-(picolinamido)naphthalen-1-yl acetate (**3ma**).

Following the general procedure, **3ma** was obtained as a white solid (62.4 mg, 81%).  $R_f = 0.50$  (n-hexane/EtOAc 3:1). m.p. 161.0–163.0 °C.  $^1\text{H NMR}$  (400 MHz,  $\text{CDCl}_3$ )  $\delta$  11.51 (s, 1H), 8.82 (dd,  $J = 8.0, 1.2$  Hz, 1H), 8.67–8.62 (m, 1H), 8.37 (d,  $J = 7.6$  Hz, 1H), 8.14 (dd,  $J = 8.4, 0.8$  Hz, 1H), 7.95 (dt,  $J = 7.6, 1.6$  Hz, 1H), 7.79 (d,  $J = 8.4$  Hz, 1H), 7.65 (t,  $J = 8.0$  Hz, 1H), 7.55–7.50 (m, 1H), 7.06 (d,  $J = 8.0$  Hz, 1H), 2.43 (s, 3H).  $^{13}\text{C}\{^1\text{H}\}$  NMR (100 MHz,  $\text{CDCl}_3$ )  $\delta$  169.2, 162.3, 150.1, 147.7, 145.6, 137.9, 134.1, 132.9, 129.5, 127.9, 126.7, 124.5, 123.0, 121.0, 120.6, 120.5, 120.4, 21.5. HRMS (ESI):  $m/z$   $[\text{M}+\text{H}]^+$  calcd for  $\text{C}_{18}\text{H}_{14}\text{BrN}_2\text{O}_3$ : 385.0188; found: 385.0182. FT-IR (neat,  $\text{cm}^{-1}$ )  $\nu$  3337, 2923, 1770, 1685, 1533, 1493, 1174, 741.

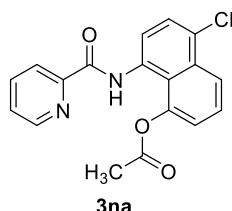

5-chloro-8-(picolinamido)naphthalen-1-yl acetate (**3na**).

Following the general procedure, **3na** was obtained as a white solid (37.4 mg, 55%).  $R_f = 0.50$  (n-hexane/EtOAc 3:1). m.p. 169.0–171.0 °C.  $^1\text{H NMR}$  (400 MHz,  $\text{CDCl}_3$ )  $\delta$  11.54 (s, 1H), 8.73 (d,  $J = 8.4$  Hz, 1H), 8.64 (d,  $J = 4.8$  Hz, 1H), 8.35 (d,  $J = 8.0$  Hz, 1H), 8.26 (d,  $J = 8.4$  Hz, 1H), 7.94 (dt,  $J = 7.6, 1.2$  Hz, 1H), 7.63 (d,  $J = 8.4$  Hz, 1H), 7.58 (t,  $J = 8.4$  Hz, 1H), 7.54–7.49 (m, 1H), 7.26 (d,  $J = 7.6$  Hz, 1H), 2.45 (s, 3H).  $^{13}\text{C}\{^1\text{H}\}$  NMR (100 MHz,  $\text{CDCl}_3$ )  $\delta$  169.3, 162.2, 150.0, 147.6, 146.1, 137.9, 133.1, 131.9, 127.8, 126.9, 126.7, 126.3, 123.6, 123.0, 121.4, 120.3, 119.0, 21.6. HRMS (ESI):  $m/z$   $[\text{M}+\text{H}]^+$  calcd for  $\text{C}_{18}\text{H}_{14}\text{ClN}_2\text{O}_3$ : 341.0693; found: 341.0687. FT-IR (neat,  $\text{cm}^{-1}$ )  $\nu$  3348, 2922, 1755, 1686, 1531, 1499, 1198, 750.

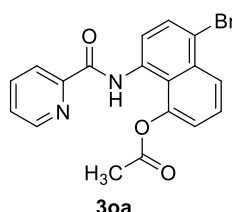

5-bromo-8-(picolinamido)naphthalen-1-yl acetate (**3oa**).

Following the general procedure, **3oa** was obtained as a white solid (67.0 mg, 87%).  $R_f = 0.50$  (n-hexane/EtOAc 3:1). m.p. 177.0–179.0 °C.  $^1\text{H NMR}$  (400 MHz,  $\text{CDCl}_3$ )  $\delta$  11.58 (s, 1H), 8.69 (d,  $J = 8.4$  Hz, 1H), 8.66 (d,  $J = 4.4$  Hz, 1H), 8.36 (d,  $J = 8.0$  Hz, 1H), 8.26 (dd,  $J = 8.4, 0.8$  Hz, 1H), 7.96 (dt,  $J = 7.6, 1.6$  Hz, 1H), 7.84 (d,  $J = 8.4$  Hz, 1H), 7.58 (t,  $J = 7.6$  Hz, 1H), 7.55–7.51 (m, 1H), 7.27 (dd,  $J = 7.6, 0.8$  Hz, 1H), 2.46 (s, 3H).  $^{13}\text{C}\{^1\text{H}\}$  NMR (100 MHz,  $\text{CDCl}_3$ )  $\delta$  169.3, 162.2, 150.0, 147.7, 146.0, 137.9, 134.1, 132.6, 130.7, 126.8, 126.6, 126.5, 123.0, 121.4, 120.4, 119.5, 118.4, 21.6. HRMS (ESI):  $m/z$   $[\text{M}+\text{H}]^+$  calcd for  $\text{C}_{18}\text{H}_{14}\text{BrN}_2\text{O}_3$ : 385.0188; found: 385.0182. FT-IR (neat,  $\text{cm}^{-1}$ )  $\nu$  3339, 2927, 1771, 1683, 1522, 1493, 1176, 750.

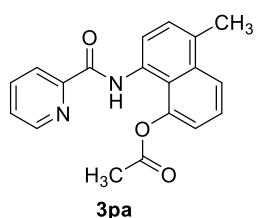

5-methyl-8-(picolinamido)naphthalen-1-yl acetate (**3pa**).

Following the general procedure, **3pa** was obtained as a white

solid (55.0 mg, 86%).  $R_f = 0.48$  (n-hexane/EtOAc 3:1). m.p. 154.0–156.0 °C.  $^1\text{H}$  NMR (400 MHz,  $\text{CDCl}_3$ )  $\delta$  11.40 (s, 1H), 8.64 (d,  $J = 4.4$  Hz, 1H), 8.60 (d,  $J = 7.6$  Hz, 1H), 8.36 (d,  $J = 8.0$  Hz, 1H), 8.00–7.89 (m, 2H), 7.53–7.47 (m, 2H), 7.39 (d,  $J = 8.0$  Hz, 1H), 7.20 (d,  $J = 8.0$  Hz, 1H), 2.67 (s, 3H), 2.41 (s, 3H).  $^{13}\text{C}\{^1\text{H}\}$  NMR (100 MHz,  $\text{CDCl}_3$ )  $\delta$  169.6, 162.1, 150.3, 147.6, 146.3, 137.7, 135.2, 131.1, 130.7, 127.3, 126.5, 125.0, 123.2, 122.8, 120.2, 119.6, 119.5, 21.6, 20.0. HRMS (ESI):  $m/z$   $[\text{M}+\text{H}]^+$  calcd for  $\text{C}_{19}\text{H}_{17}\text{N}_2\text{O}_3$ : 321.1239; found: 321.1234. FT-IR (neat,  $\text{cm}^{-1}$ )  $\nu$  3335, 2925, 1764, 1676, 1528, 1505, 1181, 747.

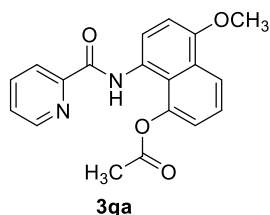

5-methoxy-8-(picolinamido)naphthalen-1-yl acetate (**3qa**).

Following the general procedure, **3qa** was obtained as a yellow solid (55.1 mg, 82%).  $R_f = 0.37$  (n-hexane/EtOAc 3:1). m.p. 138.0–140.0 °C.  $^1\text{H}$  NMR (400 MHz,  $\text{CDCl}_3$ )  $\delta$  11.14 (s, 1H), 8.66–8.59 (m, 1H), 8.51 (d,  $J = 8.8$  Hz, 1H), 8.35 (d,  $J = 7.6$  Hz, 1H), 8.26 (dd,  $J = 8.8, 1.6$  Hz, 1H), 7.91 (dd,  $J = 7.6, 1.6$  Hz,

1H), 7.51–7.42 (m, 2H), 7.22 (d,  $J = 7.6, 1.2$  Hz, 1H), 6.88 (d,  $J = 8.4$  Hz, 1H), 4.00 (s, 3H), 2.36 (s, 3H).  $^{13}\text{C}\{^1\text{H}\}$  NMR (100 MHz,  $\text{CDCl}_3$ )  $\delta$  169.6, 162.1, 152.6, 150.4, 147.6, 145.7, 137.7, 128.0, 126.4, 124.9, 124.7, 122.7, 121.2, 120.92, 120.87, 120.7, 104.2, 55.7, 21.5. HRMS (ESI):  $m/z$   $[\text{M}+\text{H}]^+$  calcd for  $\text{C}_{19}\text{H}_{17}\text{N}_2\text{O}_4$ : 337.1188; found: 337.1183. FT-IR (neat,  $\text{cm}^{-1}$ )  $\nu$  3350, 2933, 1763, 1670, 1538, 1506, 1185, 1038, 749.

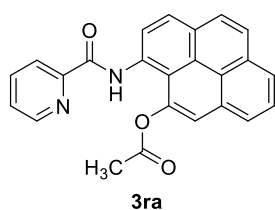

3-(picolinamido)pyren-4-yl acetate (**3ra**). Following the general procedure, **3ra** was obtained as a yellow solid (62.3 mg, 82%).  $R_f = 0.26$  (n-hexane/EtOAc 3:1). m.p. 214.0–216.0

°C.  $^1\text{H}$  NMR (400 MHz,  $\text{CDCl}_3$ )  $\delta$  11.75 (s, 1H), 9.25 (d,  $J = 8.8$  Hz, 1H), 8.70 (d,  $J = 4.4$  Hz, 1H), 8.42 (d,  $J = 7.6$  Hz, 1H), 8.24 (d,  $J = 8.8$  Hz, 1H), 8.13 (d,  $J = 7.6$  Hz, 1H), 8.07 (d,  $J =$

7.2 Hz, 1H), 8.04–7.92 (m, 4H), 7.76 (s, 1H), 7.56–7.09 (m, 1H), 2.49 (s, 3H).  $^{13}\text{C}\{^1\text{H}\}$  NMR (100 MHz,  $\text{CDCl}_3$ )  $\delta$  169.6, 162.3, 150.3, 147.8, 145.0, 137.9, 131.6, 131.3, 130.4, 128.5, 127.6, 127.1, 126.7, 126.6, 126.5, 125.3, 124.4, 123.6, 123.1, 120.8, 120.5, 116.1, 21.8. HRMS (ESI):  $m/z$   $[\text{M}+\text{H}]^+$  calcd for  $\text{C}_{24}\text{H}_{17}\text{N}_2\text{O}_3$ : 381.1239; found: 381.1234. FT-IR (neat,  $\text{cm}^{-1}$ )  $\nu$  3340, 2927, 1770, 1682, 1517, 1492, 1180, 746.

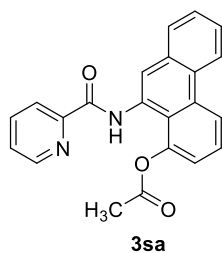

10-(picolinamido)phenanthren-1-yl acetate (**3sa**). Following the general procedure, **3sa** was obtained as a white solid (57.0 mg, 80%).  $R_f = 0.27$  (n-hexane/EtOAc 3:1). m.p. 191.0–193.0 °C.  $^1\text{H}$

NMR (400 MHz,  $\text{CDCl}_3$ )  $\delta$  11.58 (s, 1H), 9.11 (s, 1H), 8.71–8.65 (m, 2H), 8.62–8.56 (m, 1H), 8.40 (d,  $J = 8.0$  Hz, 1H), 7.95 (dt,  $J = 8.0, 1.2$  Hz, 1H), 7.92–7.87 (m, 1H), 7.66 (t,  $J = 8.0$  Hz, 1H),

7.63–7.57 (m, 2H), 7.55–7.50 (m, 1H), 7.32 (d,  $J = 7.6$  Hz, 1H), 2.46 (s, 3H).  $^{13}\text{C}\{^1\text{H}\}$  NMR (100 MHz,  $\text{CDCl}_3$ )  $\delta$  169.6, 162.5, 150.3, 147.7, 146.5, 137.9, 133.6, 131.9,

130.0, 128.6, 127.7, 127.5, 126.6, 126.4, 126.2, 122.9, 122.7, 121.7, 121.6, 119.3, 119.2, 21.6. HRMS (ESI):  $m/z$   $[M+H]^+$  calcd for  $C_{22}H_{17}N_2O_3$ : 357.1239; found: 357.1234. FT-IR (neat,  $cm^{-1}$ )  $\nu$  3347, 2940, 1771, 1683, 1523, 1169, 755.

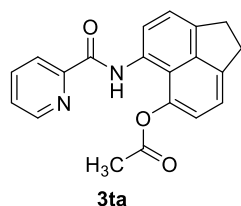

6-(picolinamido)-1,2-dihydroacenaphthylen-5-yl acetate (**3ta**). Following the general procedure, **3ta** was obtained as a white solid (35.5 mg, 53%).  $R_f$  = 0.30 (n-hexane/EtOAc 3:1). m.p. 161.0–163.0 °C.  $^1H$  NMR (400 MHz,  $CDCl_3$ )  $\delta$  11.28 (s, 1H), 8.74 (d,  $J$  = 8.0 Hz, 1H), 8.64 (d,  $J$  = 4.4 Hz, 1H), 8.37 (d,  $J$  = 8.0 Hz, 1H), 7.94 (dt,  $J$  = 7.6, 1.6 Hz, 1H), 7.53–7.49 (m, 1H), 7.33 (d,  $J$  = 8.0 Hz, 1H), 7.25 (d,  $J$  = 7.26 Hz, 1H), 7.16 (d,  $J$  = 7.6 Hz, 1H), 3.39 (s, 4H), 2.52 (s, 3H).  $^{13}C\{^1H\}$  NMR (100 MHz,  $CDCl_3$ )  $\delta$  169.9, 162.1, 150.4, 147.6, 144.4, 142.6, 142.1, 141.5, 137.8, 129.1, 126.4, 122.8, 121.4, 120.4, 120.1, 119.1, 117.3, 30.3, 30.1, 21.6. HRMS (ESI):  $m/z$   $[M+H]^+$  calcd for  $C_{20}H_{17}N_2O_3$ : 333.1239; found: 333.1234. FT-IR (neat,  $cm^{-1}$ )  $\nu$  3335, 2929, 1767, 1671, 1528, 1498, 1179, 753.

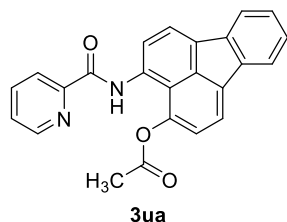

4-(picolinamido)fluoranthren-3-yl acetate (**3ua**). Following the general procedure, **3ua** was obtained as a yellow solid (31.9 mg, 42%).  $R_f$  = 0.27 (n-hexane/EtOAc 3:1). m.p. 225.0–227.0 °C.  $^1H$  NMR (400 MHz,  $CDCl_3$ )  $\delta$  11.62 (s, 1H), 9.05 (d,  $J$  = 8.0 Hz, 1H), 8.64 (d,  $J$  = 4.8 Hz, 1H), 8.40 (d,  $J$  = 8.0 Hz, 1H), 8.00–7.83 (m, 5H), 7.56–7.51 (m, 1H), 7.40–7.31 (m, 3H), 2.64 (s, 3H).  $^{13}C\{^1H\}$  NMR (100 MHz,  $CDCl_3$ )  $\delta$  169.3, 162.3, 150.2, 147.6, 146.1, 139.1, 138.4, 137.9, 135.1, 134.1, 133.8, 132.6, 127.5, 127.1, 126.7, 123.0, 121.7, 121.3, 121.2, 121.1, 120.0, 119.0, 115.8, 21.8. HRMS (ESI):  $m/z$   $[M+H]^+$  calcd for  $C_{24}H_{17}N_2O_3$ : 381.1239; found: 381.1234. FT-IR (neat,  $cm^{-1}$ )  $\nu$  3333, 2924, 1762, 1676, 1529, 1443, 1187, 1039, 750.

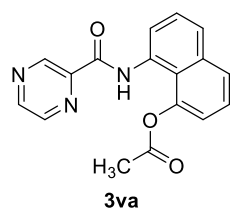

8-(pyrazine-2-carboxamido)naphthalen-1-yl acetate (**3va**). Following the general procedure, **3va** was obtained as a white solid (17.8 mg, 29%).  $R_f$  = 0.22 (n-hexane/EtOAc 3:1). m.p. 171.0–173.0 °C.  $^1H$  NMR (400 MHz,  $CDCl_3$ )  $\delta$  11.32 (s, 1H), 9.60 (s, 1H), 8.85 (d,  $J$  = 2.0 Hz, 1H), 8.78 (d,  $J$  = 8.0 Hz, 1H), 8.61 (s, 1H), 7.77 (d,  $J$  = 8.4 Hz, 1H), 7.71 (d,  $J$  = 8.4 Hz, 1H), 7.54 (t,  $J$  = 8.0 Hz, 1H), 7.47 (t,  $J$  = 8.0 Hz, 1H), 7.21 (d,  $J$  = 7.2 Hz, 1H), 2.46 (s, 3H).  $^{13}C\{^1H\}$  NMR (100 MHz,  $CDCl_3$ )  $\delta$  169.2, 160.8, 147.6, 145.7, 145.3, 144.9, 141.9, 136.4, 132.0, 127.3, 126.4, 125.5, 125.4, 120.6, 119.5, 118.9, 21.7. HRMS (ESI):  $m/z$   $[M+H]^+$  calcd for  $C_{17}H_{14}N_3O_3$ : 308.1035; found: 308.1030. FT-IR (neat,  $cm^{-1}$ )  $\nu$  3337, 2925, 1764, 1680, 1534, 1498, 1174, 1020, 754.

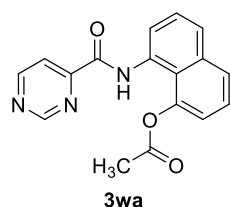

8-(pyrimidine-4-carboxamido)naphthalen-1-yl acetate (**3wa**). Following the general procedure, **3wa** was obtained as a yellow solid (35.6 mg, 58%).  $R_f$  = 0.22 (n-hexane/EtOAc 3:1). m.p.



189.0–191.0 °C.  $^1\text{H}$  NMR (400 MHz,  $\text{CDCl}_3$ )  $\delta$  11.50 (s, 1H), 9.34 (s, 1H), 9.06 (d,  $J = 4.8$  Hz, 1H), 8.77 (d,  $J = 8.0$  Hz, 1H), 8.29 (dd,  $J = 4.8, 1.6$  Hz, 1H), 7.77 (d,  $J = 8.0$  Hz, 1H), 7.71 (d,  $J = 8.0$  Hz, 1H), 7.53 (t,  $J = 7.6$  Hz, 1H), 7.47 (t,  $J = 8.0$  Hz, 1H), 7.22 (dd,  $J = 7.8, 1.6$  Hz, 1H), 2.50 (s, 3H).  $^{13}\text{C}\{^1\text{H}\}$  NMR (100 MHz,  $\text{CDCl}_3$ )  $\delta$  169.3, 160.4, 159.7, 157.4, 157.8, 145.7, 136.3, 131.8, 124.3, 126.4, 125.7, 125.5, 120.7, 119.5, 119.1, 118.9, 21.8. HRMS (ESI):  $m/z$   $[\text{M}+\text{H}]^+$  calcd for  $\text{C}_{17}\text{H}_{14}\text{N}_3\text{O}_3$ : 308.1035; found: 308.1030. FT-IR (neat,  $\text{cm}^{-1}$ )  $\nu$  3328, 2922, 1761, 1676, 1529, 1493, 1180, 756.

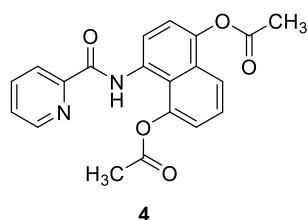

4-(picolinamido)naphthalene-1,5-diyl diacetate (**4**).

Following the general procedure, **4** was obtained as a gray solid (29.8 mg, 41%).  $R_f = 0.23$  (n-hexane/EtOAc 3:1). m.p. 163.0–165.0 °C.  $^1\text{H}$  NMR (400 MHz,  $\text{CDCl}_3$ )  $\delta$  11.51 (s, 1H), 8.78 (d,  $J = 8.4$  Hz, 1H), 8.65 (d,  $J = 4.4$  Hz, 1H), 8.37 (d,  $J = 7.6$  Hz, 1H), 7.95 (t,  $J = 7.6$  Hz, 1H), 7.83 (d,  $J = 8.4$  Hz, 1H), 7.56–7.48 (m, 2H), 7.33 (d,  $J = 8.4$  Hz, 1H), 7.25 (d,  $J = 7.2$  Hz, 1H), 2.47 (s, 3H), 2.46 (s, 3H).  $^{13}\text{C}\{^1\text{H}\}$  NMR (100 MHz,  $\text{CDCl}_3$ )  $\delta$  169.4, 169.3, 162.2, 150.2, 147.7, 146.2, 143.0, 137.9, 130.7, 129.4, 126.7, 125.9, 123.0, 121.1, 120.2, 120.0, 119.0, 118.9, 21.6, 21.0. HRMS (ESI):  $m/z$   $[\text{M}+\text{H}]^+$  calcd for  $\text{C}_{20}\text{H}_{17}\text{N}_2\text{O}_5$ : 365.1137; found: 365.1132. FT-IR (neat,  $\text{cm}^{-1}$ )  $\nu$  3345, 2926, 1761, 1678, 1530, 1502, 1177, 749.

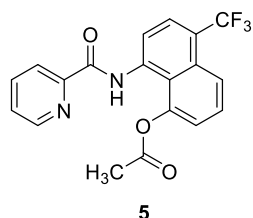

8-(picolinamido)-5-(trifluoromethyl)naphthalen-1-yl acetate (**5**).

Following the general procedure, **5** was obtained as a gray solid (33.6 mg, 45%).  $R_f = 0.25$  (n-hexane/EtOAc 3:1). m.p. 144.0–146.0 °C.  $^1\text{H}$  NMR (400 MHz,  $\text{CDCl}_3$ )  $\delta$  10.05 (s, 1H), 8.71 (d,  $J = 4.4$  Hz, 1H), 8.35 (d,  $J = 7.6$  Hz, 1H), 8.01–7.92 (m, 2H), 7.86 (d,  $J = 8.0$  Hz, 1H), 7.78 (d,  $J = 8.8$  Hz, 1H), 7.62–7.53 (m, 2H), 7.22 (d,  $J = 7.6$  Hz, 1H), 1.79 (s, 3H).  $^{13}\text{C}\{^1\text{H}\}$  NMR (100 MHz,  $\text{CDCl}_3$ )  $\delta$  170.1, 164.2, 149.0, 148.4, 146.7, 137.7, 137.6, 130.7 (q,  $J = 2.1$  Hz), 129.0, 128.0, 127.4, 127.0, 126.3 (q,  $J = 28.9$  Hz), 124.9, 123.7 (q,  $J = 272.3$  Hz), 122.9, 122.2, 122.1 (q,  $J = 5.0$  Hz), 20.6.  $^{19}\text{F}$  NMR (376 MHz,  $\text{CDCl}_3$ )  $\delta$  -60.6. HRMS (ESI):  $m/z$   $[\text{M}+\text{H}]^+$  calcd for  $\text{C}_{19}\text{H}_{14}\text{F}_3\text{N}_2\text{O}_3$ : 375.0957; found: 375.0951. FT-IR (neat,  $\text{cm}^{-1}$ )  $\nu$  3342, 2936, 1765, 1695, 1495, 1181, 1130, 752.

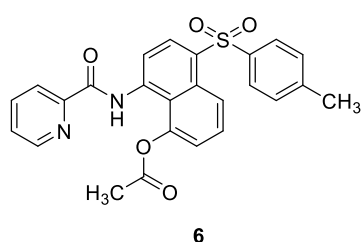

8-(picolinamido)-5-tosyl naphthalen-1-yl acetate (**6**).

Following the general procedure, **6** was obtained as a gray solid (50.2 mg, 51%).  $R_f = 0.13$  (n-hexane/EtOAc 3:1). m.p. 215.0–217.0 °C.  $^1\text{H}$  NMR (400 MHz,  $\text{CDCl}_3$ )

$\delta$  11.95 (s, 1H), 9.06 (d,  $J = 8.8$  Hz, 1H), 8.68–8.54 (m, 3H), 8.35 (d,  $J = 7.6$  Hz, 1H), 7.95 (t,  $J = 7.6$  Hz, 1H), 7.82 (d,  $J = 8.0$  Hz, 2H), 7.58–7.49 (m, 2H), 7.27–7.18 (m, 3H), 2.49 (s, 3H), 2.35 (s, 3H).  $^{13}\text{C}\{^1\text{H}\}$  NMR (100 MHz,  $\text{CDCl}_3$ )  $\delta$  169.1, 162.7, 149.5, 147.7, 146.4, 144.0, 138.8, 138.7, 138.0, 131.5, 131.4, 131.3, 129.7, 127.5, 127.4, 127.1, 123.25, 123.19, 121.5, 119.2, 116.0, 21.6, 21.5. HRMS (ESI):  $m/z$   $[\text{M}+\text{H}]^+$  calcd for  $\text{C}_{25}\text{H}_{21}\text{N}_2\text{O}_5\text{S}$ : 461.1171; found: 461.1166. FT-IR (neat,  $\text{cm}^{-1}$ )  $\nu$  3335, 2925, 1778, 1693, 1521, 1174, 1146, 750.

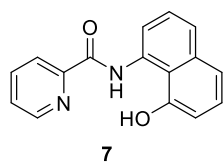

**7**

*N*-(8-hydroxynaphthalen-1-yl)picolinamide (**7**). Following the general procedure, **7** was obtained as a gray solid (42.2 mg, 80%).  $R_f = 0.20$  (n-hexane/EtOAc 3:1). m.p. 226.0–228.0 °C.  $^1\text{H}$  NMR (400 MHz,  $\text{DMSO}-d_6$ )  $\delta$  13.26 (s, 1H), 11.44 (s, 1H), 8.86 (d,  $J = 7.6$  Hz, 1H), 8.74 (d,  $J = 4.8$  Hz, 1H), 8.23 (d,  $J = 7.6$  Hz, 1H), 8.10 (t,  $J = 7.6$  Hz, 1H), 7.68 (dd,  $J = 7.6, 4.8$  Hz, 1H), 7.57 (d,  $J = 8.4$  Hz, 1H), 7.46 (t,  $J = 8.0$  Hz, 1H), 7.37 (d,  $J = 8.0$  Hz, 1H), 7.32 (t,  $J = 8.0$  Hz, 1H), 6.95 (d,  $J = 7.6$  Hz, 1H).  $^{13}\text{C}\{^1\text{H}\}$  NMR (100 MHz,  $\text{DMSO}-d_6$ )  $\delta$  126.7, 154.0, 150.8, 149.1, 138.7, 136.7, 135.7, 127.4, 127.0, 126.6, 124.0, 122.8, 120.3, 115.8, 115.3, 110.6. HRMS (ESI):  $m/z$   $[\text{M}+\text{H}]^+$  calcd for  $\text{C}_{16}\text{H}_{13}\text{N}_2\text{O}_2$ : 265.0977; found: 265.0972. FT-IR (neat,  $\text{cm}^{-1}$ )  $\nu$  2922, 2852, 1655, 1545, 817, 751.

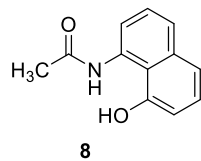

**8**

*N*-(8-hydroxynaphthalen-1-yl)acetamide (**8**). Following the general procedure, **8** was obtained as a white solid (44.8 mg, 85%).  $R_f = 0.10$  (n-hexane/EtOAc 3:1). m.p. 156.0–158.0 °C.  $^1\text{H}$  NMR (400 MHz,  $\text{DMSO}-d_6$ )  $\delta$  11.25 (s, 1H), 11.08 (s, 1H), 8.40 (d,  $J = 7.6$  Hz, 1H), 7.49 (dd,  $J = 8.0, 0.8$  Hz, 1H), 7.38–7.32 (m, 2H), 7.28 (t,  $J = 7.8$  Hz, 1H), 6.89 (dd,  $J = 7.8, 1.2$  Hz, 1H), 2.15 (s, 3H).  $^{13}\text{C}\{^1\text{H}\}$  NMR (100 MHz,  $\text{DMSO}-d_6$ )  $\delta$  168.1, 153.8, 136.6, 136.1, 126.8, 126.5, 123.3, 120.4, 115.6, 115.1, 110.6, 25.8. HRMS (ESI):  $m/z$   $[\text{M}+\text{H}]^+$  calcd for  $\text{C}_{12}\text{H}_{12}\text{NO}_2$ : 202.0868; found: 202.0863. FT-IR (neat,  $\text{cm}^{-1}$ )  $\nu$  2926, 2854, 1659, 1554, 1433, 1300, 818, 759.

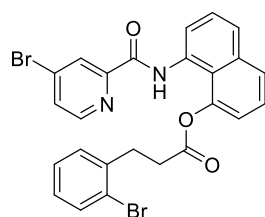

**3ha-14**

8-(4-bromopicolinamido)naphthalen-1-yl 3-(2-bromophenyl)propanoate (**3ha-14**). Following the general procedure, **3ha-14** was obtained as a white solid (33.7 mg, 42%).  $R_f = 0.70$  (n-hexane/EtOAc 3:1). m.p. 134.0–136.0 °C.  $^1\text{H}$  NMR (400 MHz,  $\text{CDCl}_3$ )  $\delta$  11.36 (s, 1H), 8.73 (d,  $J = 7.6$  Hz, 1H), 8.48 (d,  $J = 1.6$  Hz, 1H), 8.24 (d,  $J = 5.2$  Hz, 1H), 7.76 (d,  $J = 8.4$  Hz, 1H), 7.69 (d,  $J = 8.0$  Hz, 1H), 7.58–7.49 (m, 3H), 7.45 (t,  $J = 7.6$  Hz, 1H), 7.25–7.08 (m, 4H), 3.12 (s, 4H).  $^{13}\text{C}\{^1\text{H}\}$  NMR (100 MHz,  $\text{CDCl}_3$ )  $\delta$  171.3, 160.8, 151.3, 148.4, 145.7, 139.3, 136.4, 134.9, 132.9, 132.2, 123.5, 129.7, 128.3, 127.7, 127.3, 126.6, 126.5, 125.31, 125.27, 124.2, 120.5, 119.5, 119.0, 34.4, 31.0. HRMS (ESI):  $m/z$   $[\text{M}+\text{H}]^+$  calcd for  $\text{C}_{25}\text{H}_{19}\text{Br}_2\text{N}_2\text{O}_3$ : 552.9762; found: 552.9757. FT-IR (neat,  $\text{cm}^{-1}$ )  $\nu$  3347, 2926, 1766, 1685, 1529, 1499, 1101, 753.

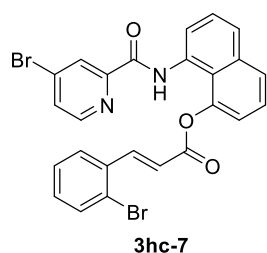

8-(4-bromopicolinamido)naphthalen-1-yl-3-(2-bromophenyl)acrylate (**3hc-7**). Following the general procedure, **3hc-7** was obtained as a yellow solid (79.5 mg, 72%).  $R_f = 0.50$  (n-hexane/EtOAc 3:1). m.p. 157.0–159.0 °C.  $^1\text{H}$  NMR (400 MHz,  $\text{CDCl}_3$ )  $\delta$  11.16 (s, 1H), 8.53 (d,  $J = 7.6$  Hz, 1H), 8.45 (d,  $J = 1.2$  Hz, 1H), 8.18–8.07 (m, 2H), 7.80 (d,  $J = 8.0$  Hz, 1H), 7.74 (d,  $J = 8.4$  Hz, 1H), 7.64 (d,  $J = 7.6$  Hz, 1H), 7.55 (t,  $J = 8.0$  Hz, 1H), 7.50 (t,  $J = 8.0$  Hz, 1H), 7.41–7.38 (m, 1H), 7.35–7.27 (m, 4H), 6.66 (d,  $J = 16.0$  Hz, 1H).  $^{13}\text{C}\{^1\text{H}\}$  NMR (100 MHz,  $\text{CDCl}_3$ )  $\delta$  164.8, 161.0, 151.3, 148.2, 146.0, 145.1, 136.4, 134.6, 134.0, 133.7, 131.77, 131.75, 129.2, 127.7, 127.5, 127.3, 126.4, 125.7, 125.6, 125.5, 120.8, 120.3, 120.2, 119.9. HRMS (ESI):  $m/z$   $[\text{M}+\text{H}]^+$  calcd for  $\text{C}_{25}\text{H}_{17}\text{Br}_2\text{N}_2\text{O}_3$ : 550.9606; found: 550.9600. FT-IR (neat,  $\text{cm}^{-1}$ )  $\nu$  3349, 2924, 1741, 1685, 1530, 1497, 1118, 756.

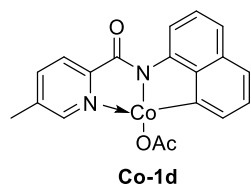

**Co-1d** was obtained as a red oil.  $R_f = 0.50$  (EtOAc).  $^1\text{H}$  NMR (400 MHz,  $\text{CDCl}_3$ )  $\delta$  7.90 (s, 1H), 7.87–7.82 (m, 1H), 7.77 (d,  $J = 7.6$  Hz, 1H), 7.58–7.51 (m, 2H), 7.41 (t,  $J = 7.2$  Hz, 1H), 7.33–7.17 (m, 1H), 7.04–6.89 (m, 2H), 1.93–1.64 (m, 6H).  $^{13}\text{C}\{^1\text{H}\}$  NMR (100 MHz,  $\text{CDCl}_3$ )  $\delta$  192.1, 169.6, 154.3, 150.1, 141.5, 139.8, 137.1, 134.1, 131.7, 127.7, 126.4, 125.9, 125.5, 124.9, 124.7, 124.2, 23.8, 18.2. HRMS (ESI):  $m/z$   $[\text{M}+\text{H}]^+$  calcd for  $\text{C}_{19}\text{H}_{16}\text{CoN}_2\text{O}_3$ : 379.0493; found: 379.0487. FT-IR (neat,  $\text{cm}^{-1}$ )  $\nu$  3048, 2923, 1634, 1606, 1475, 1398, 796, 773.

8. Copies of  $^1\text{H}$ ,  $^{13}\text{C}$  and  $^{19}\text{F}$  NMR spectra of silver carboxylates **2a-1**–**2d-16**

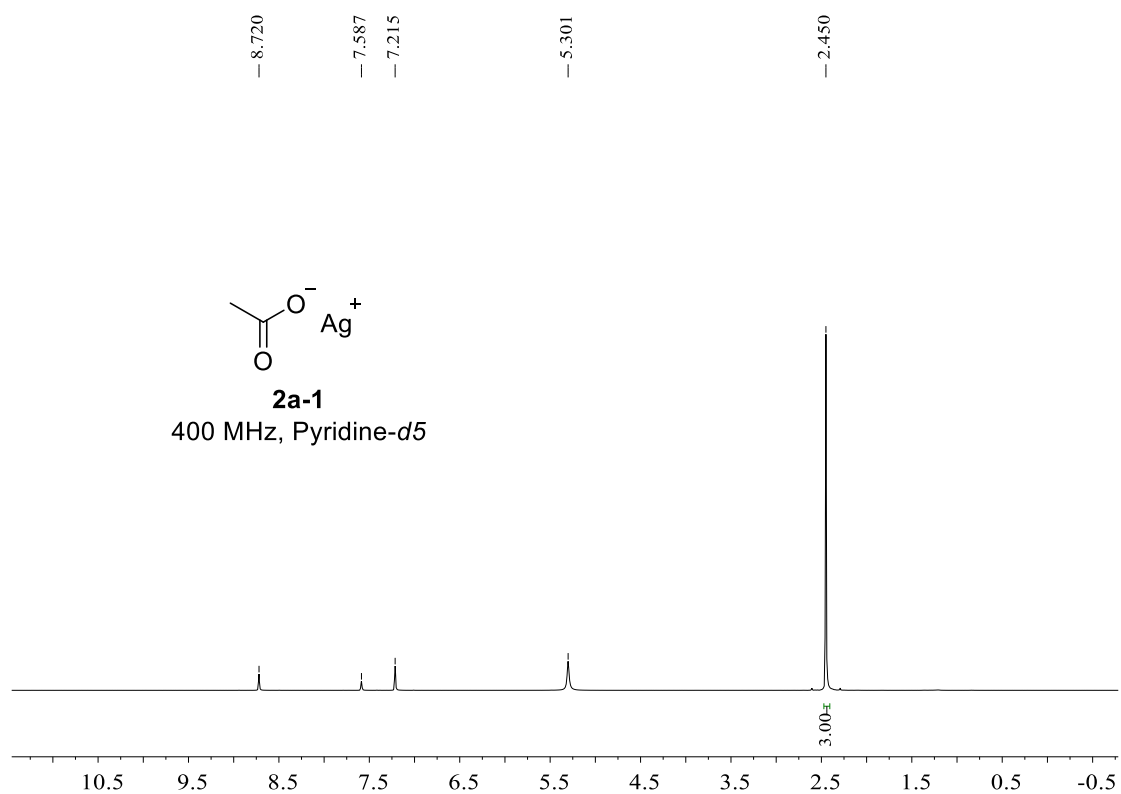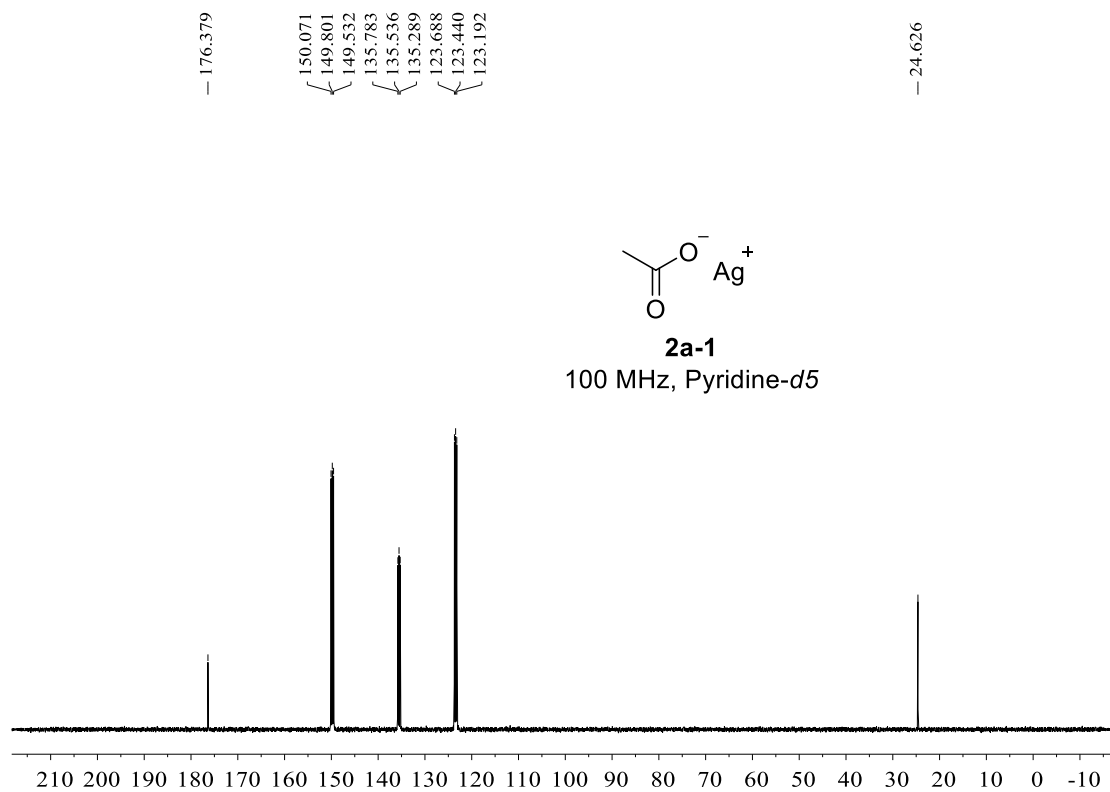

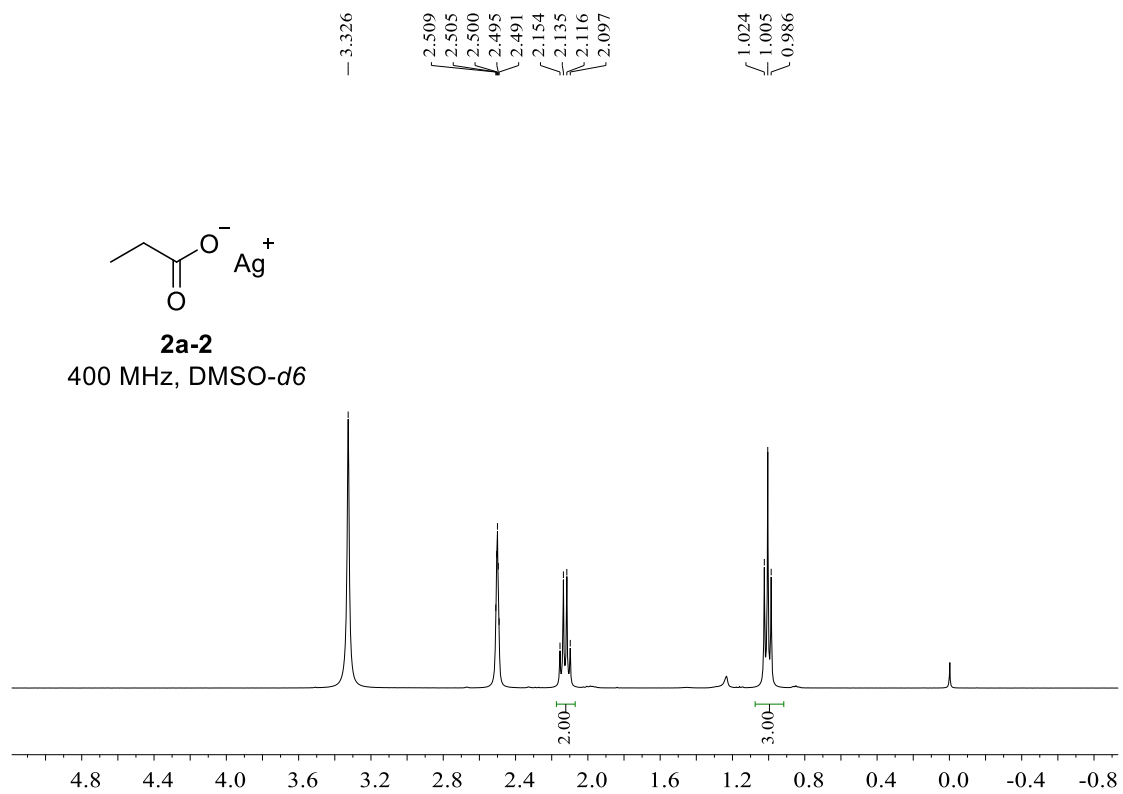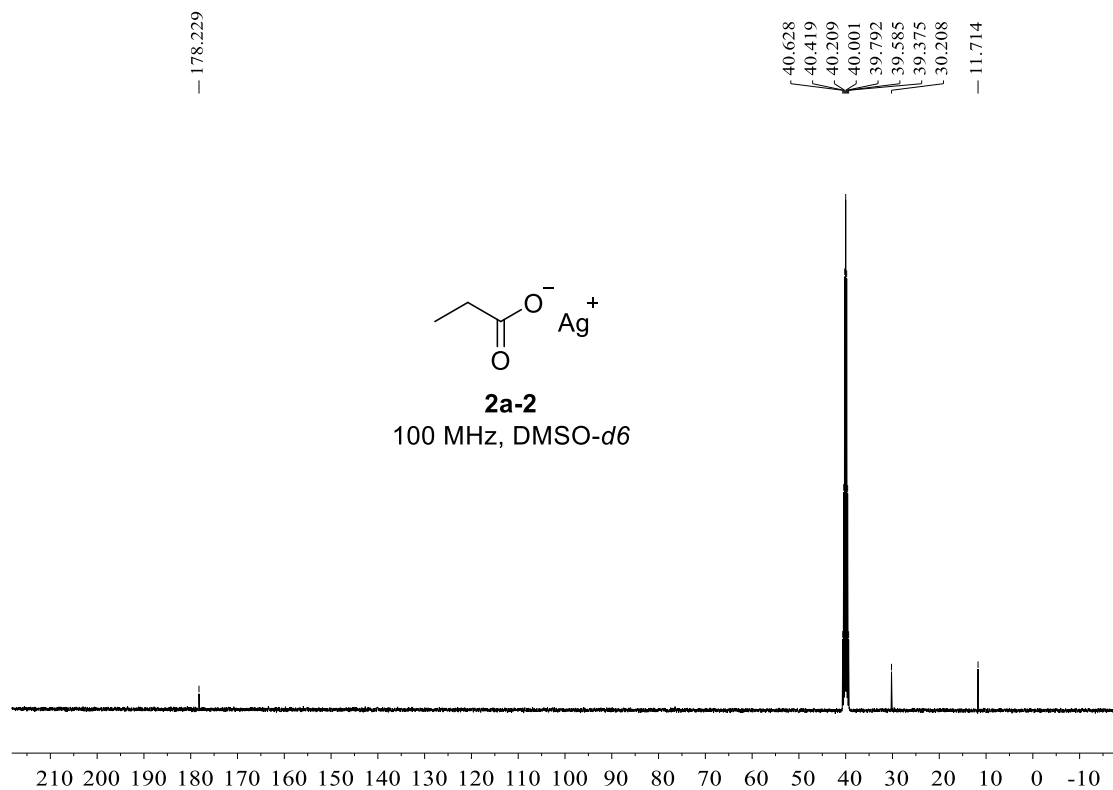

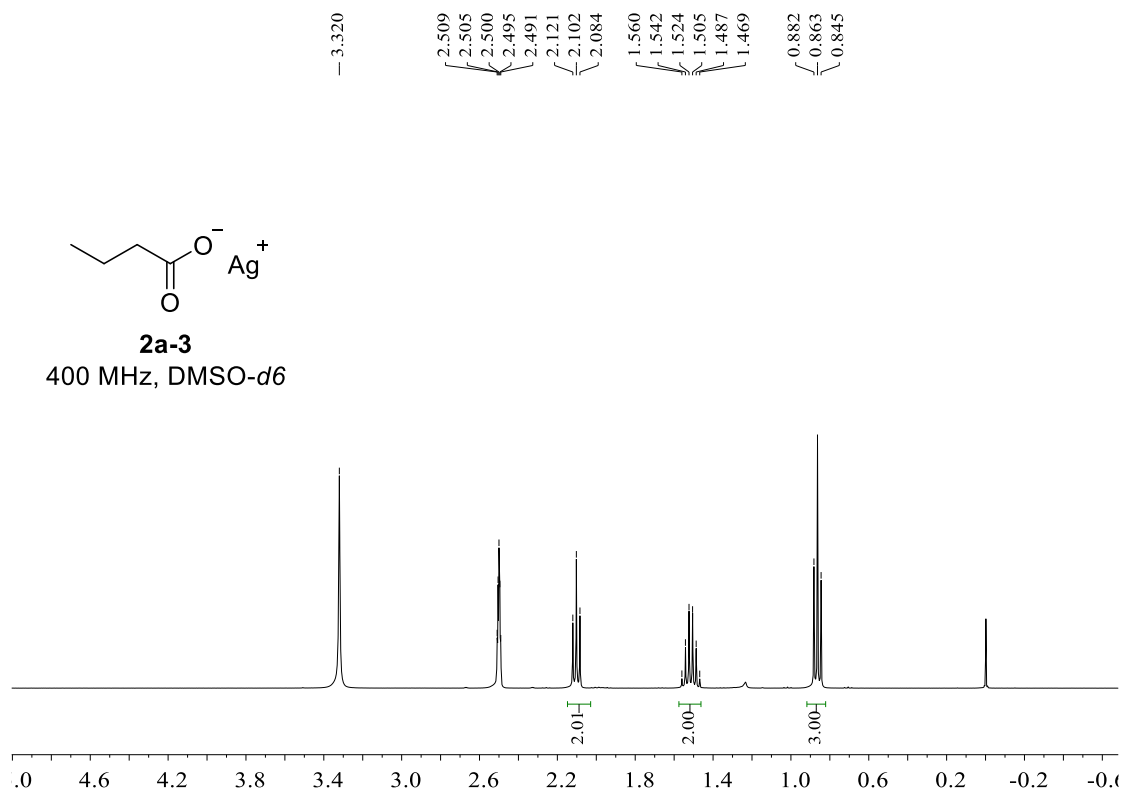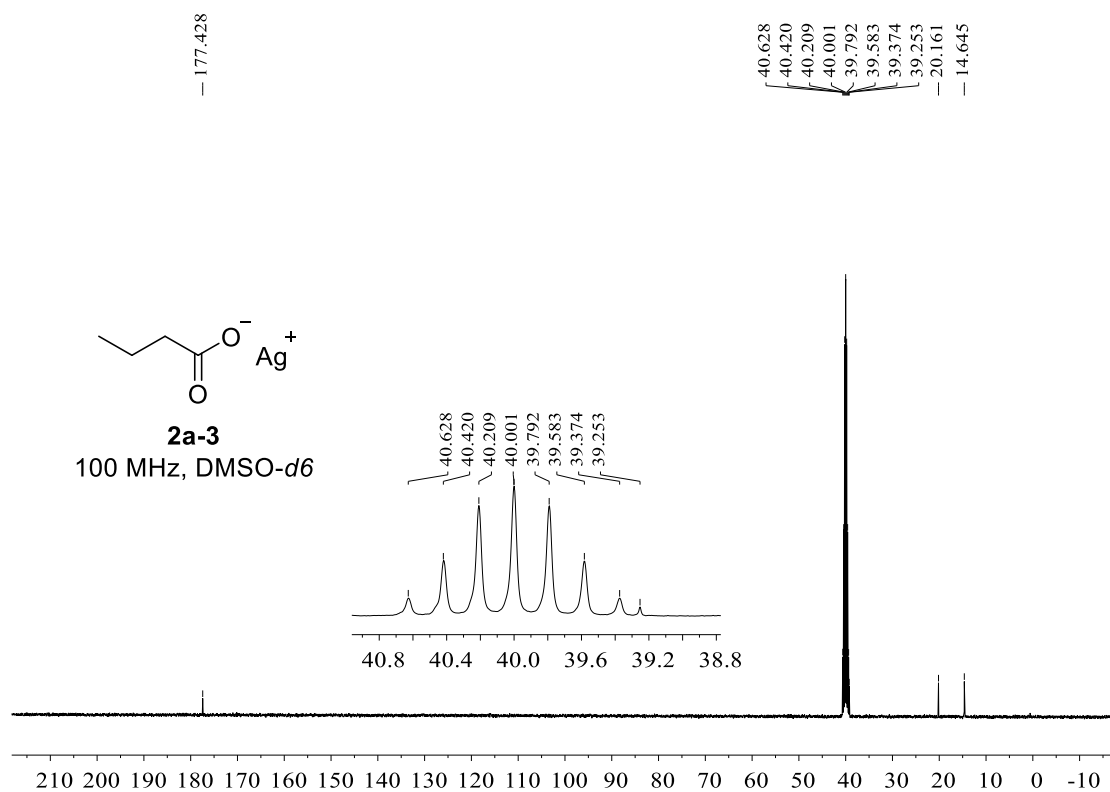

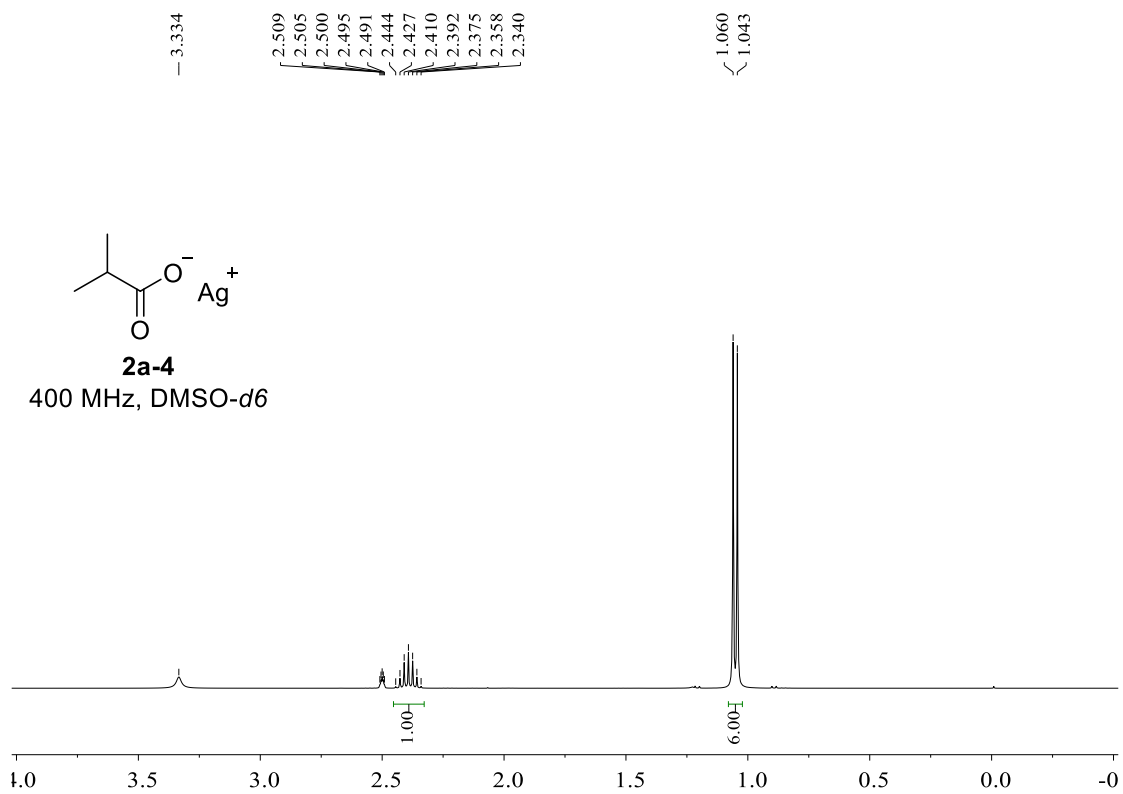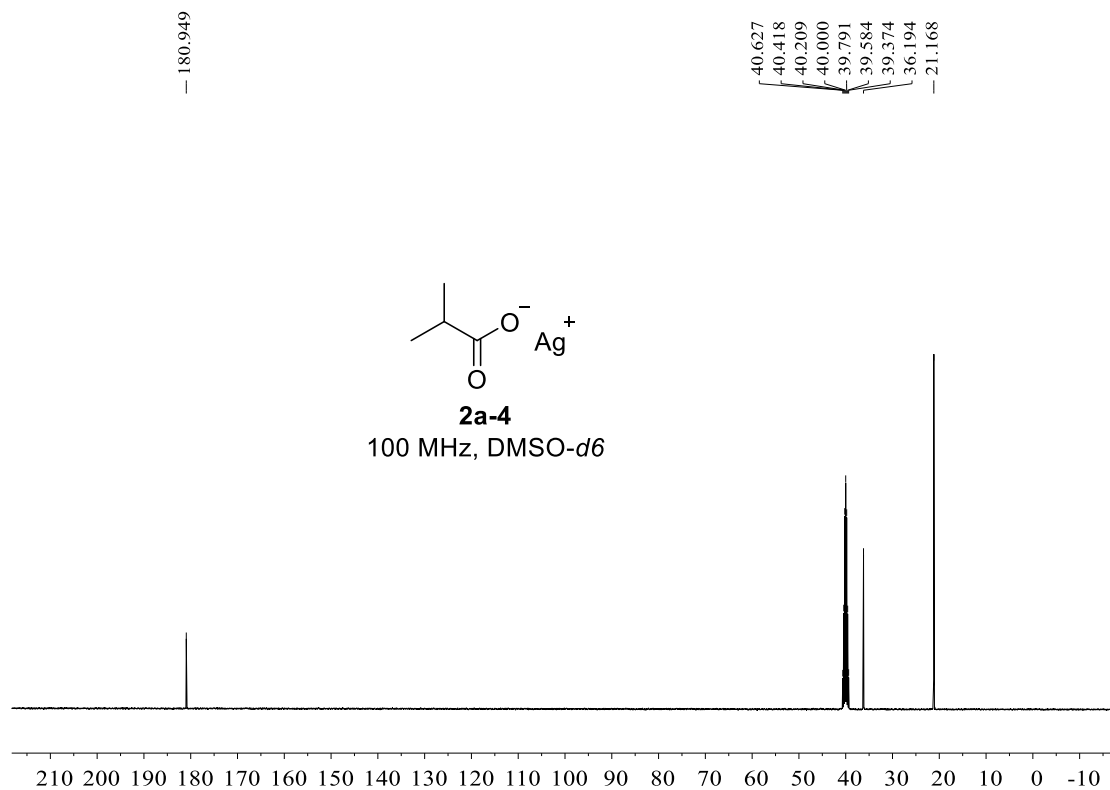

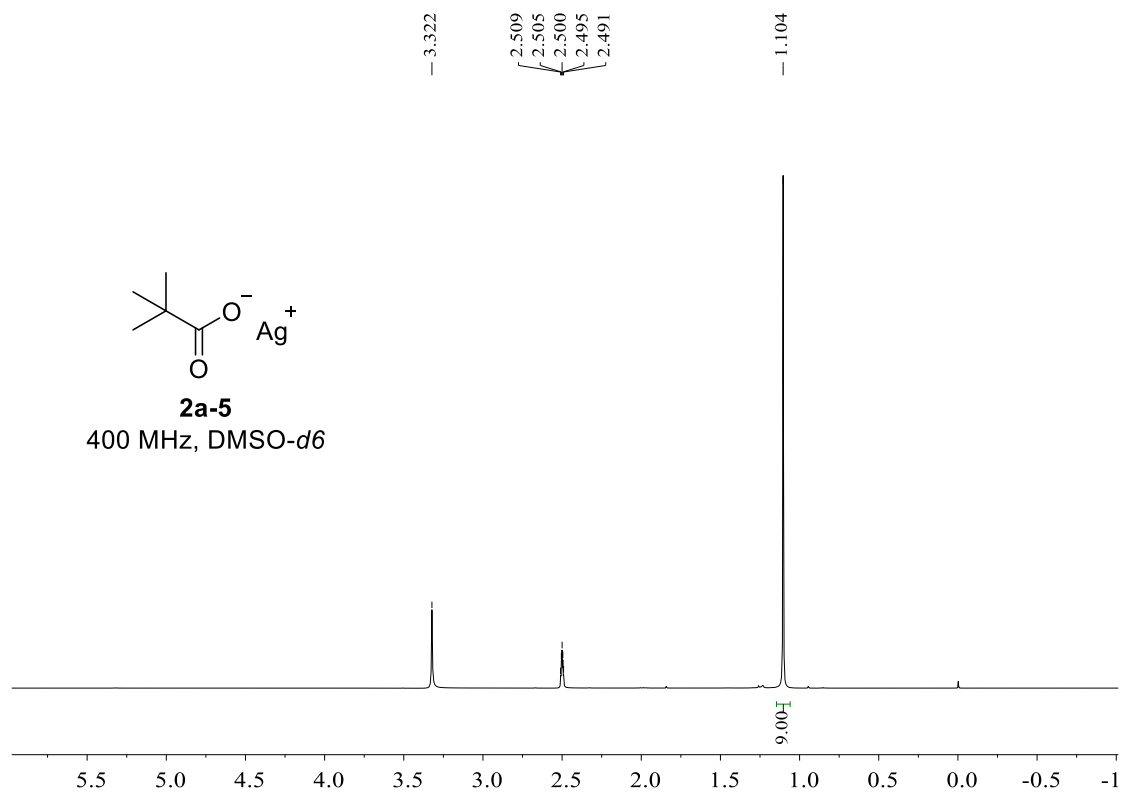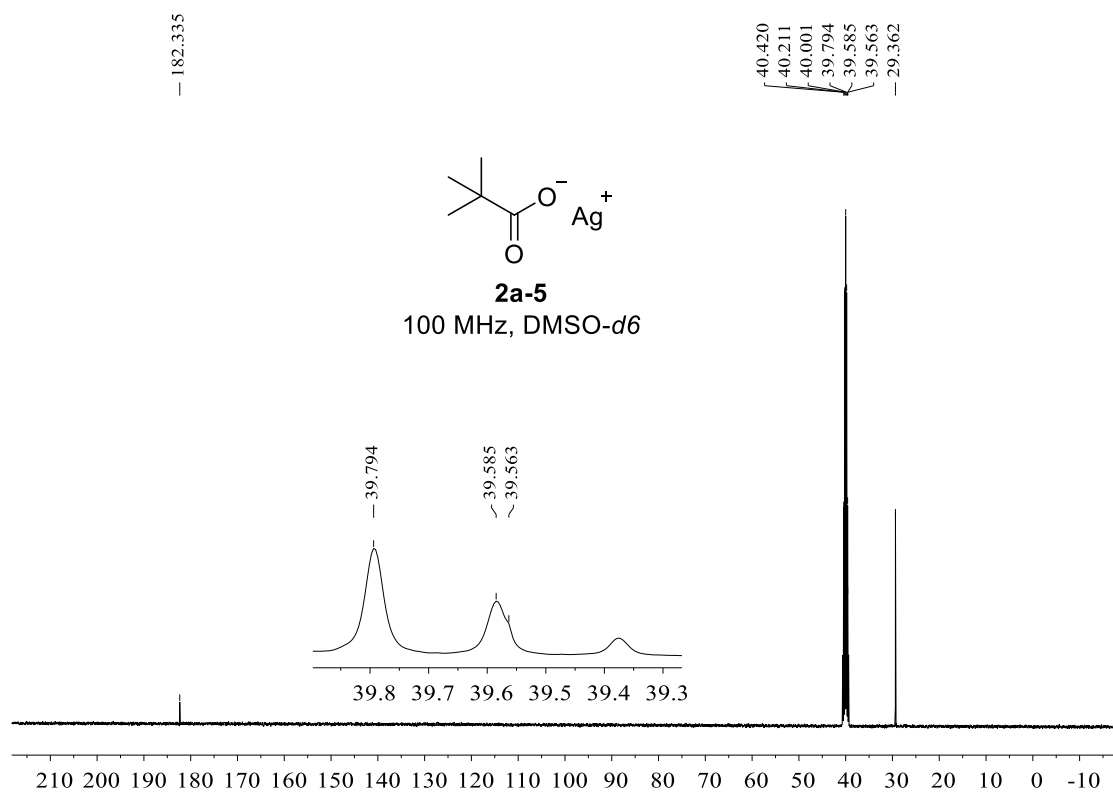



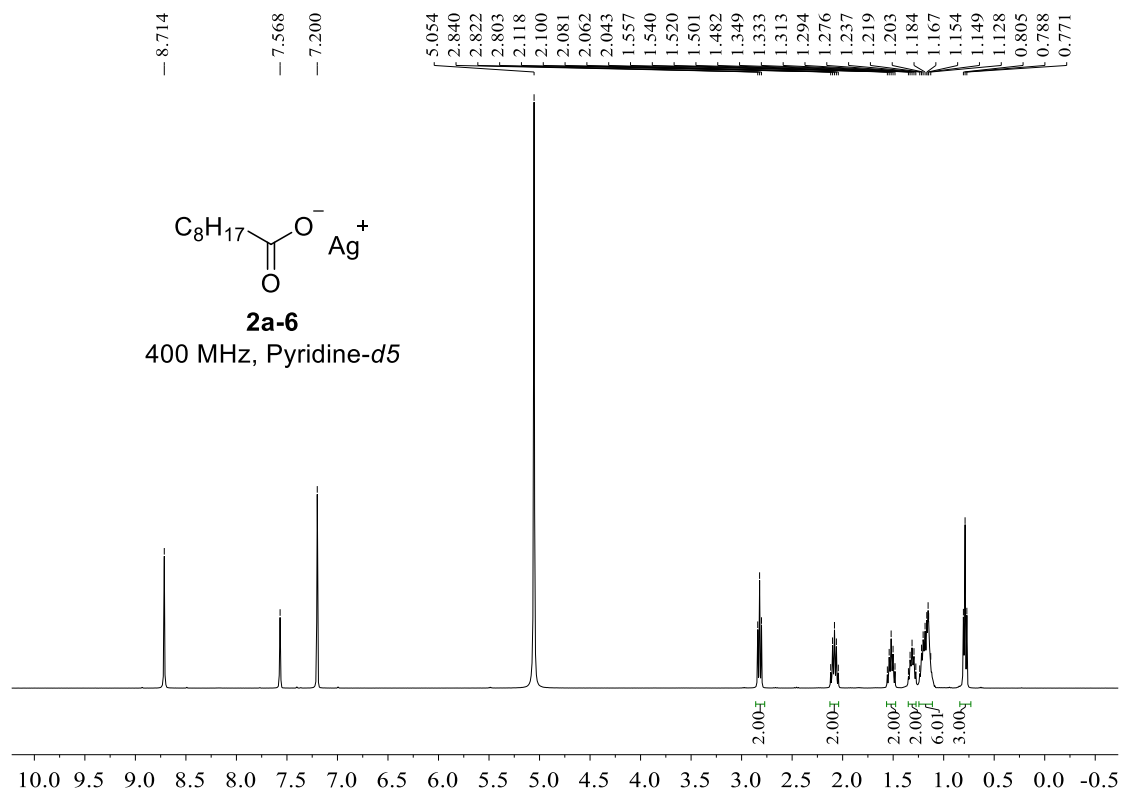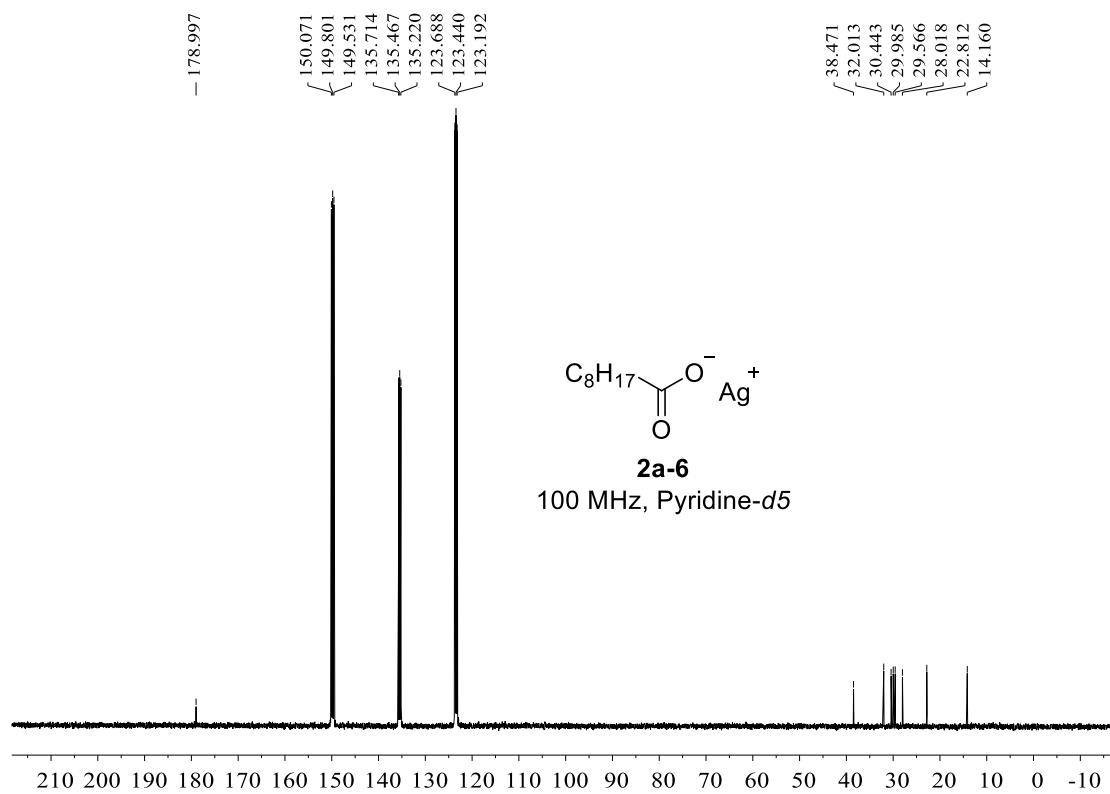

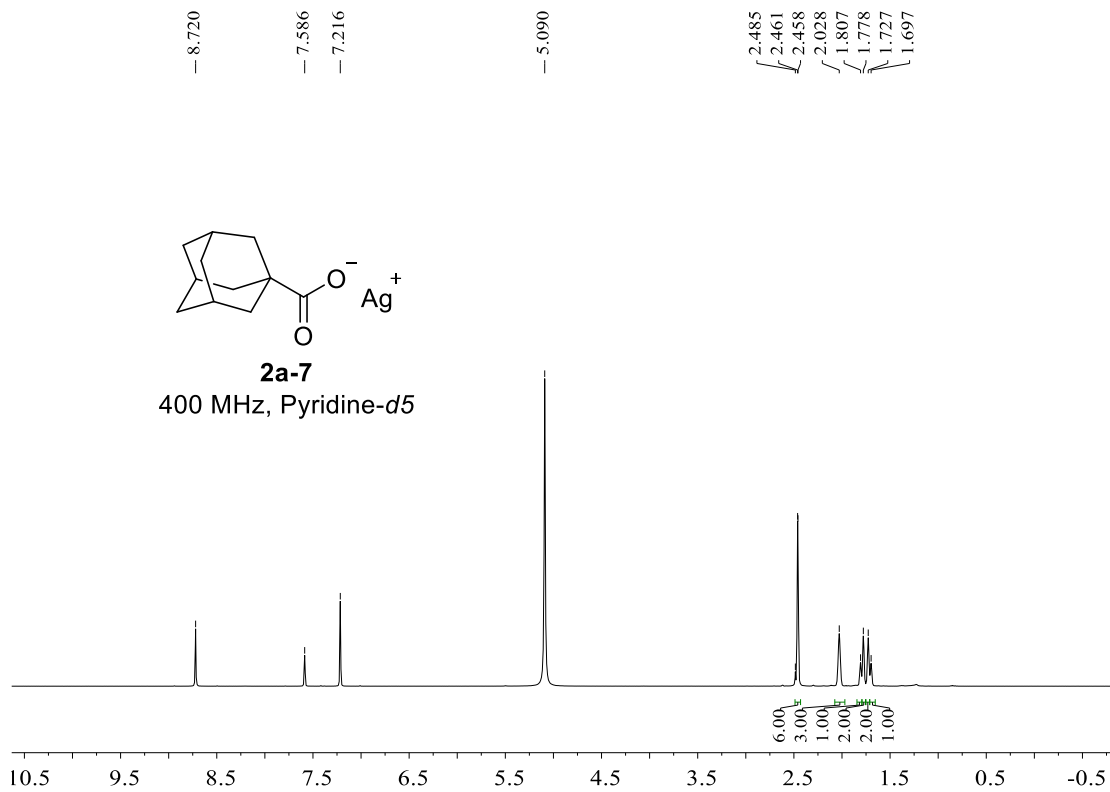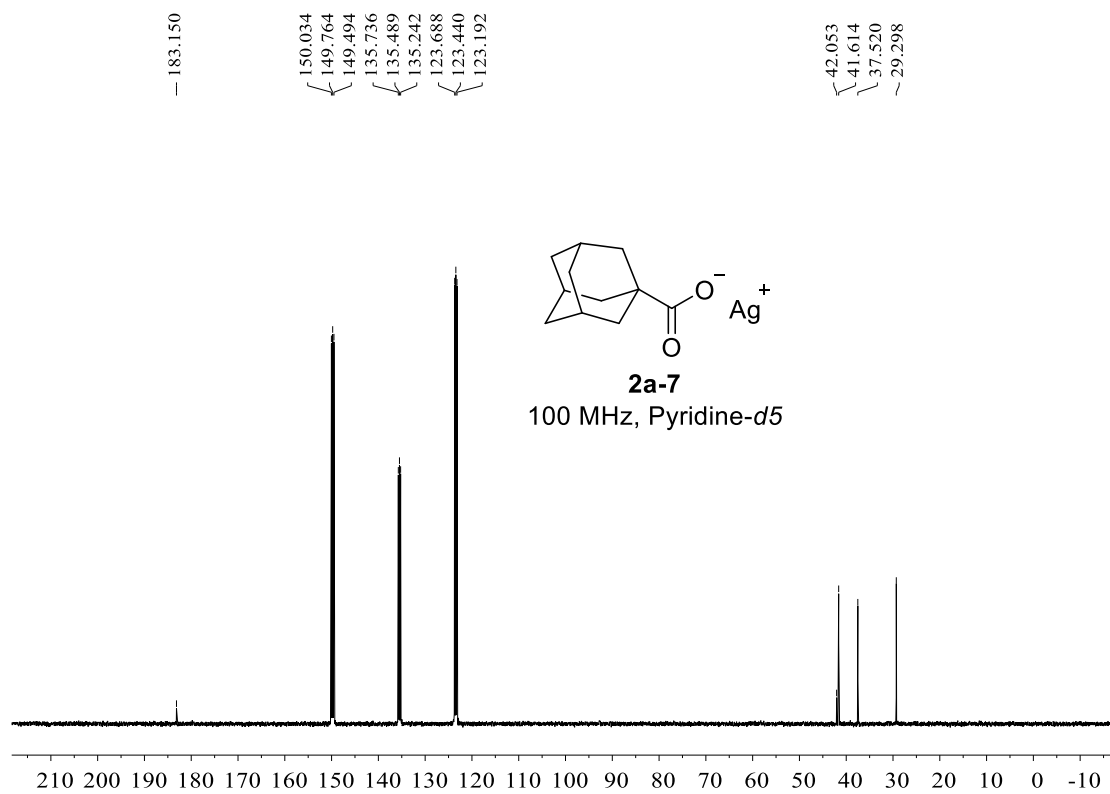

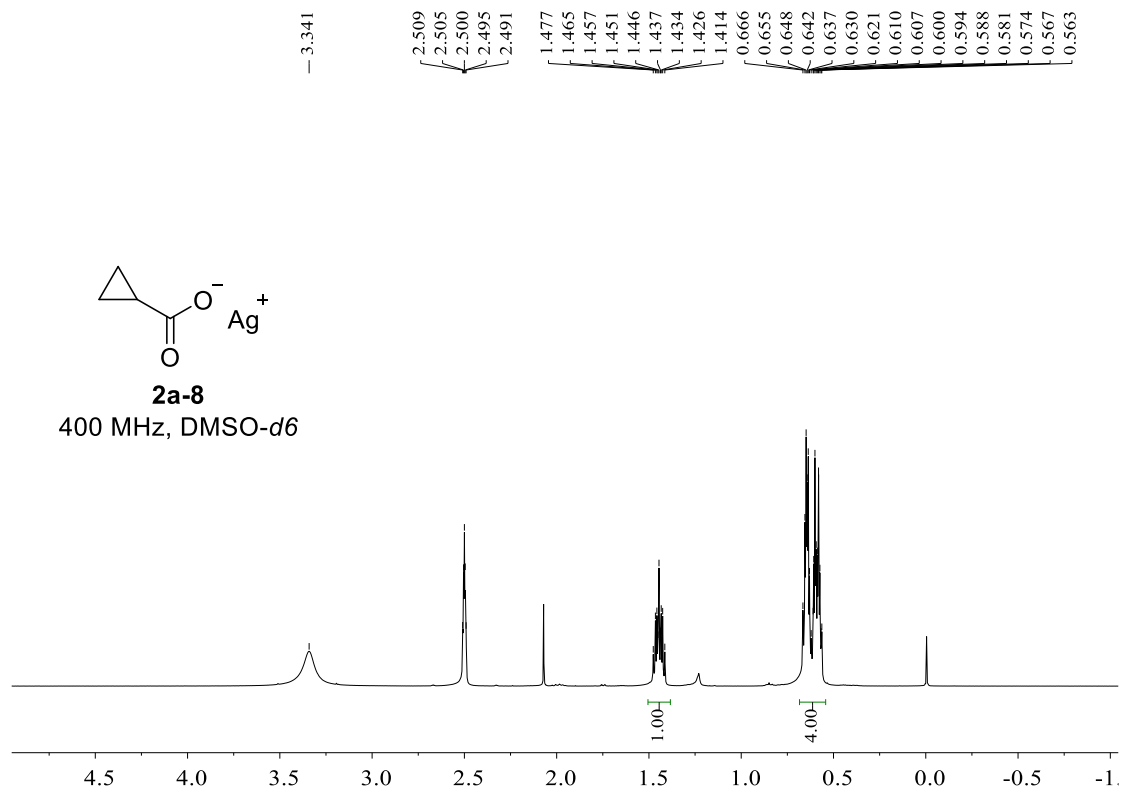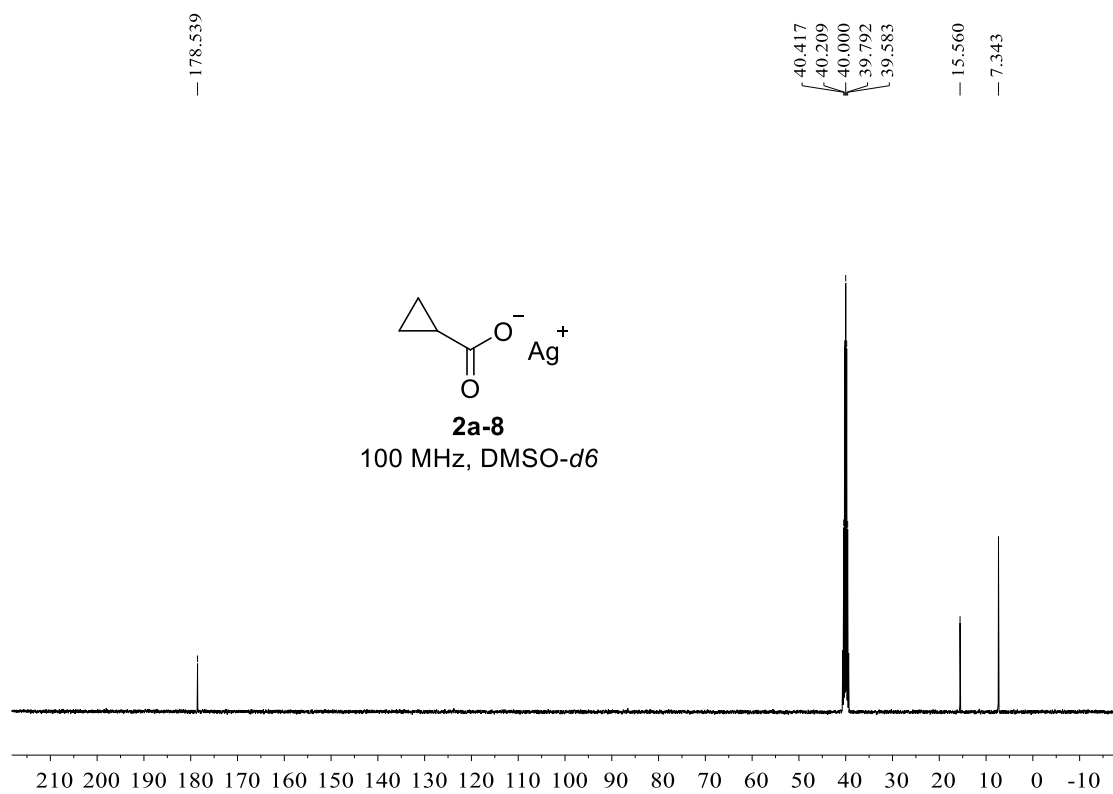

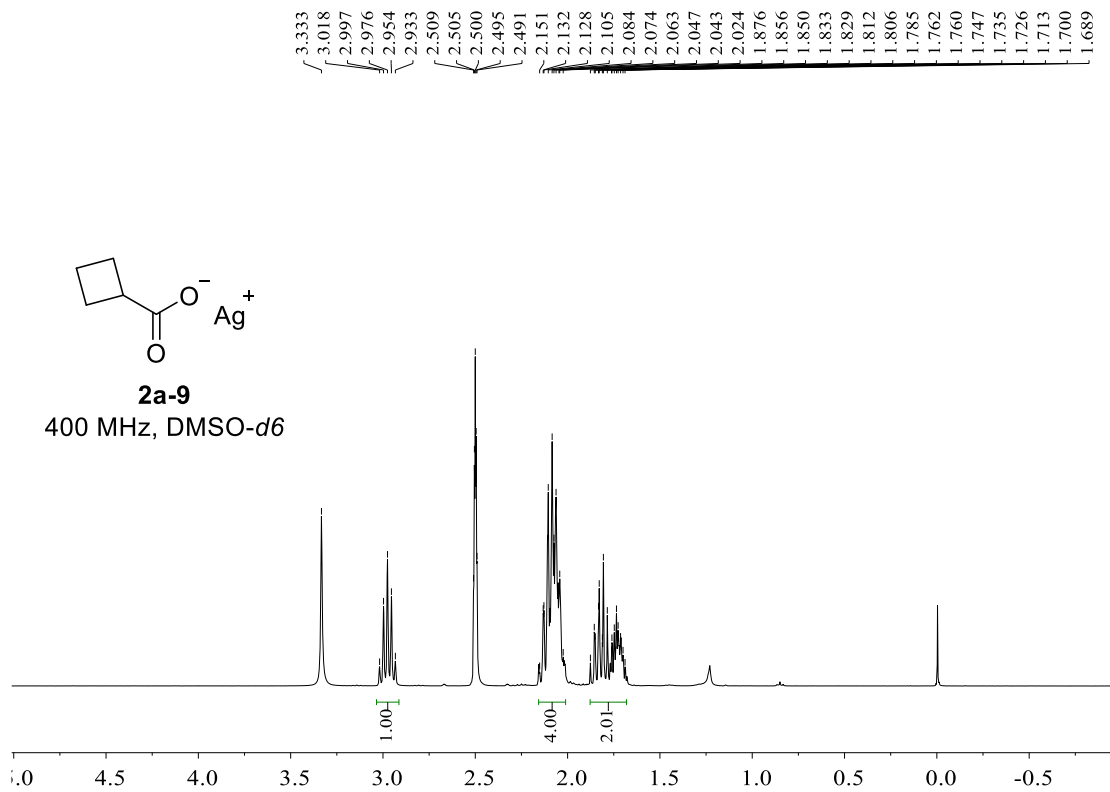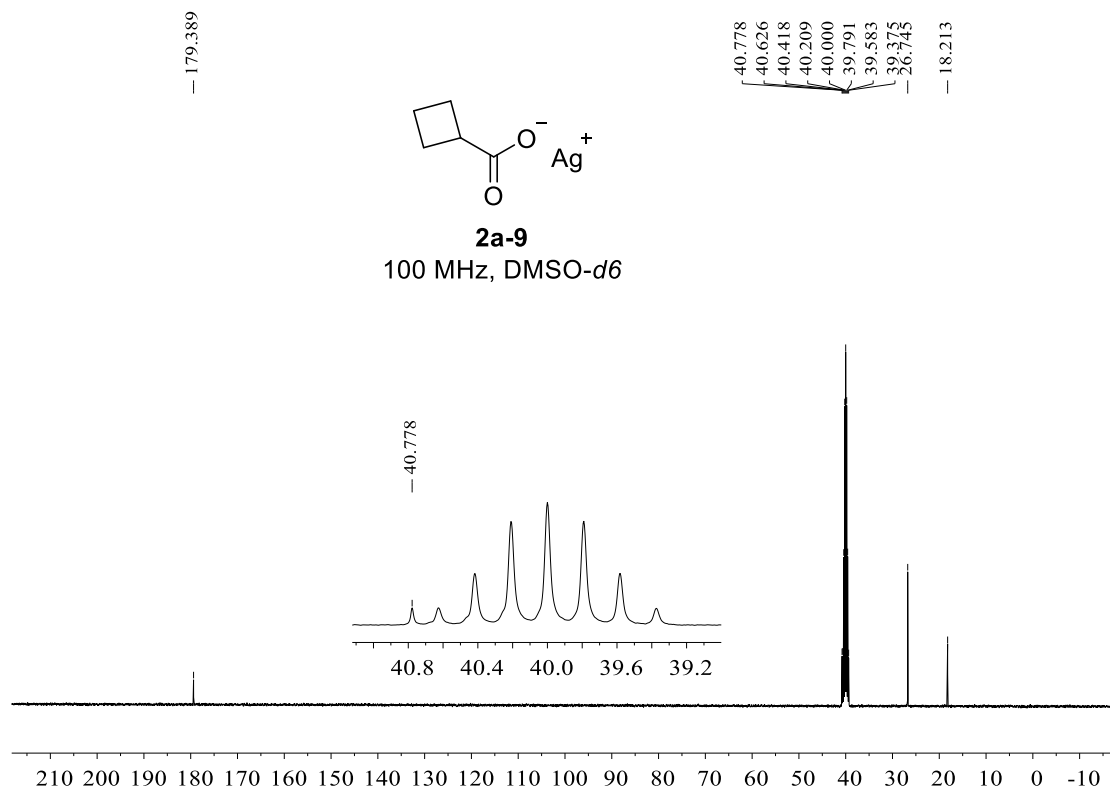

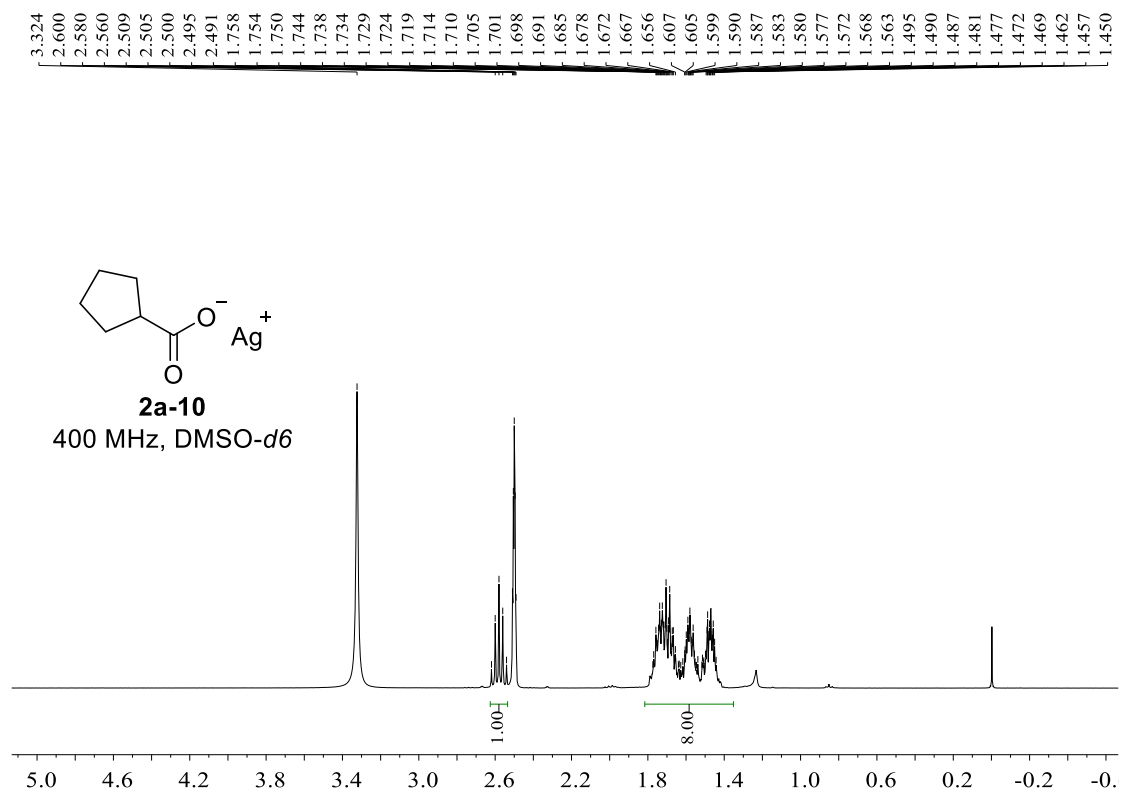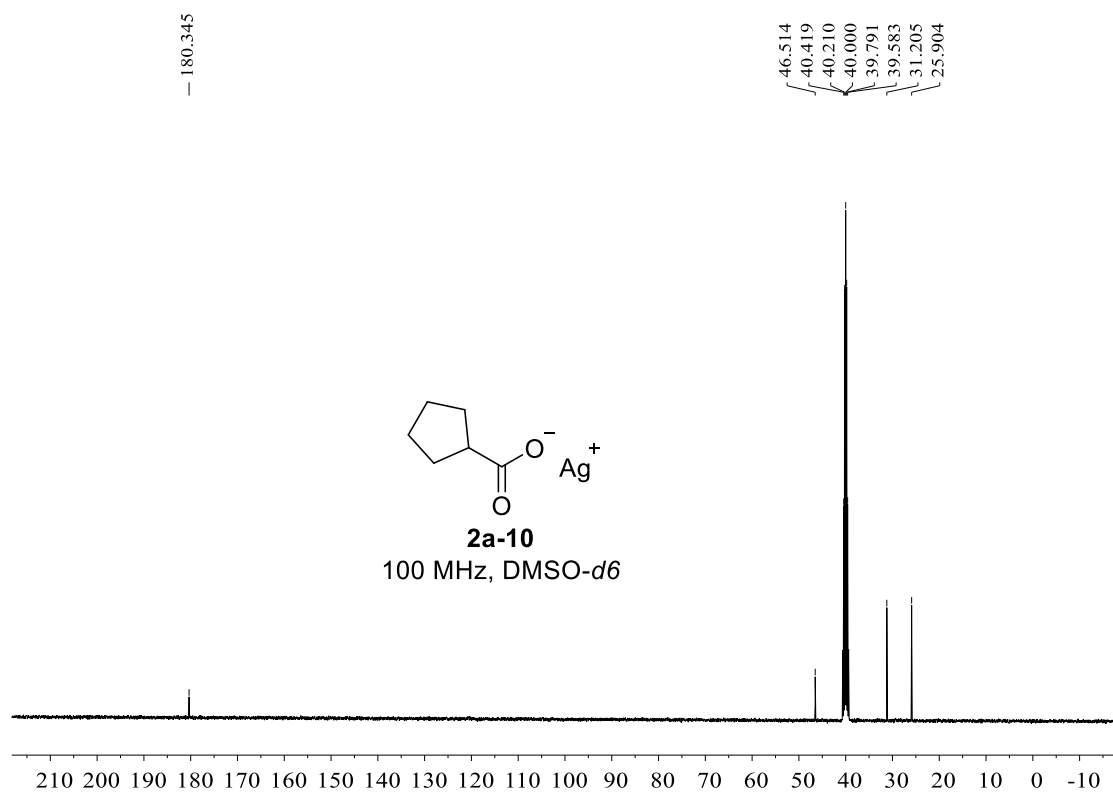

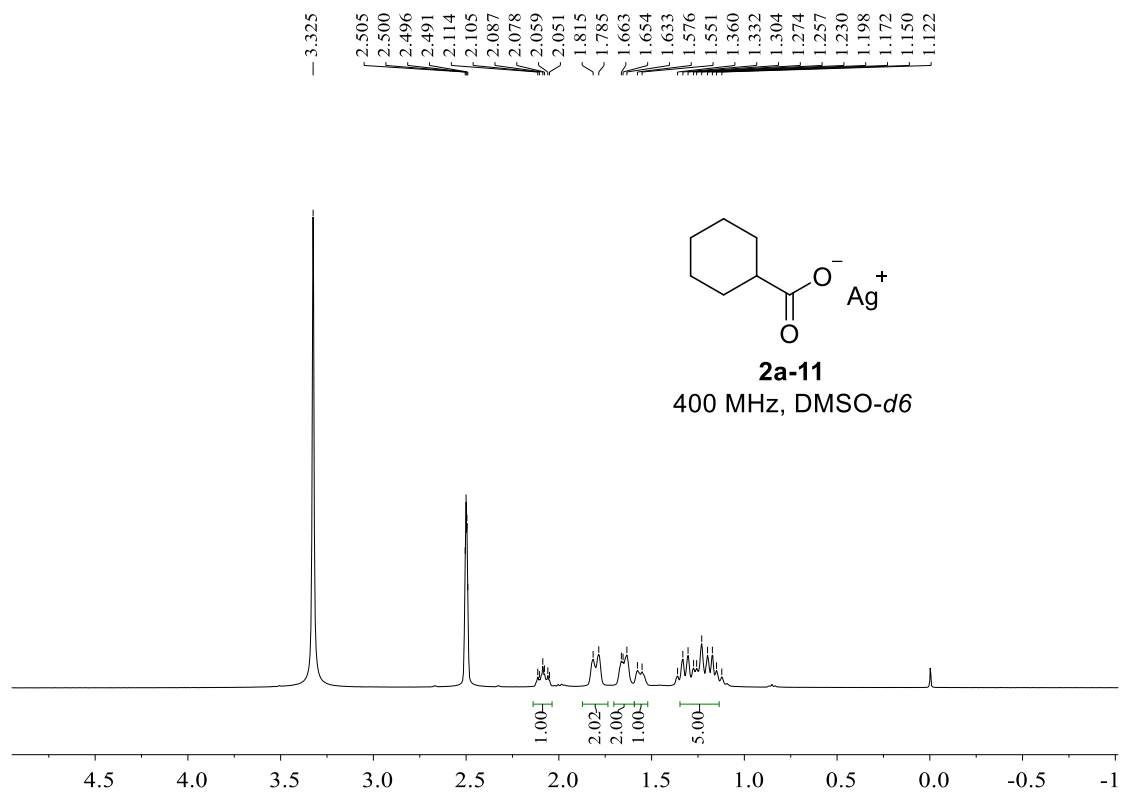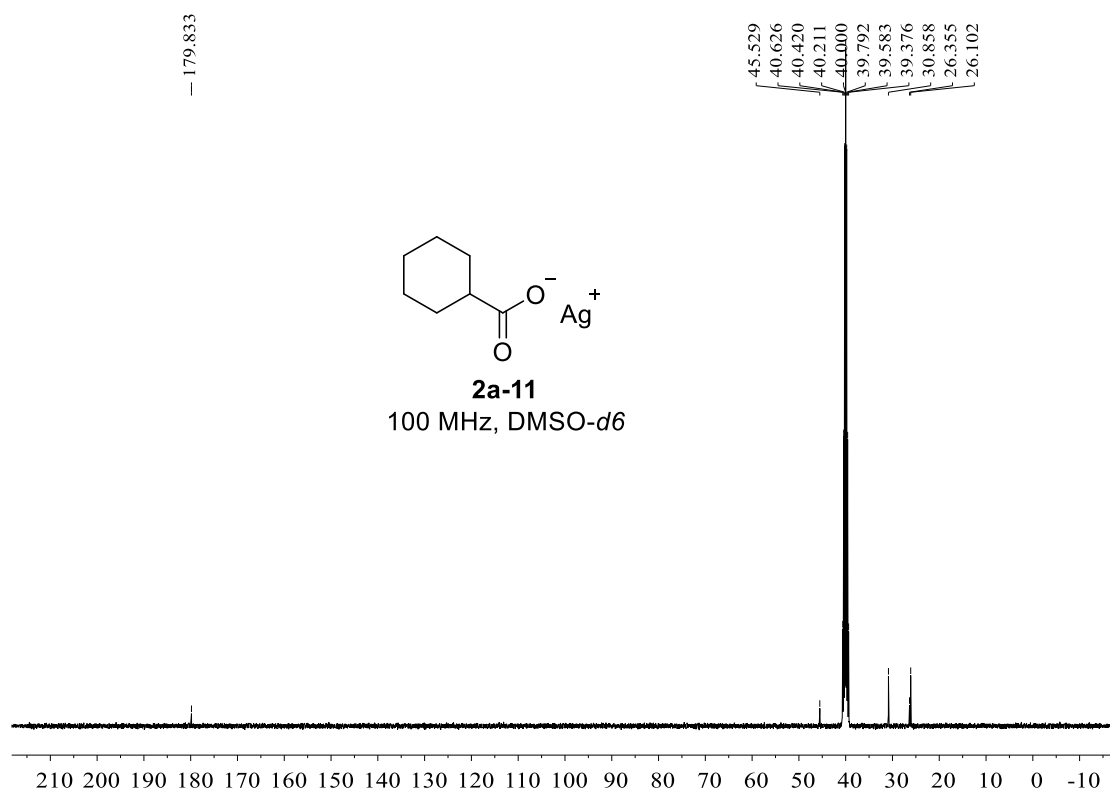

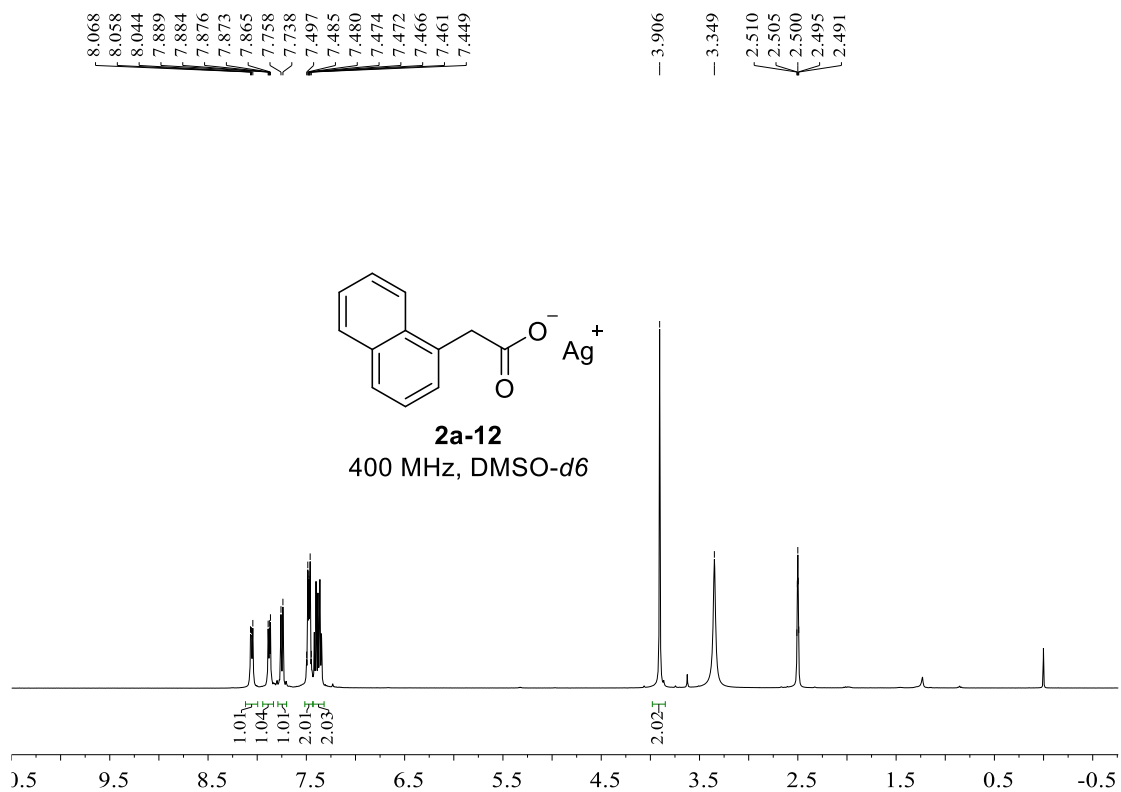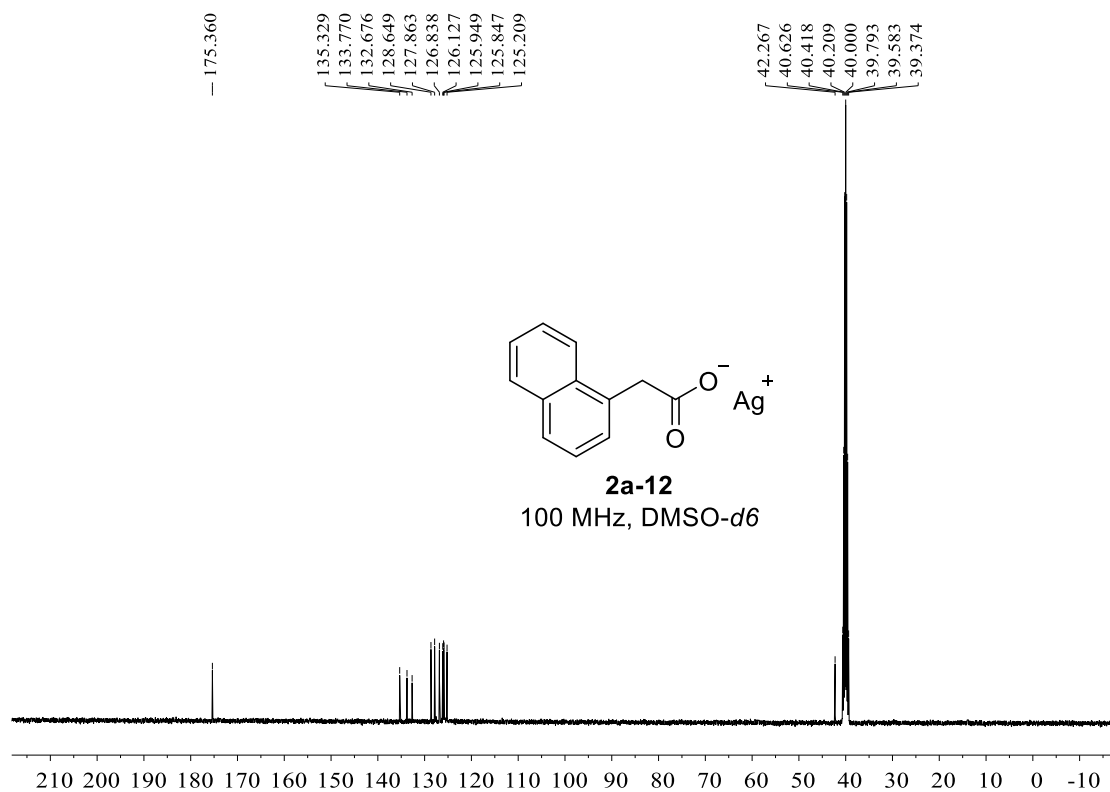

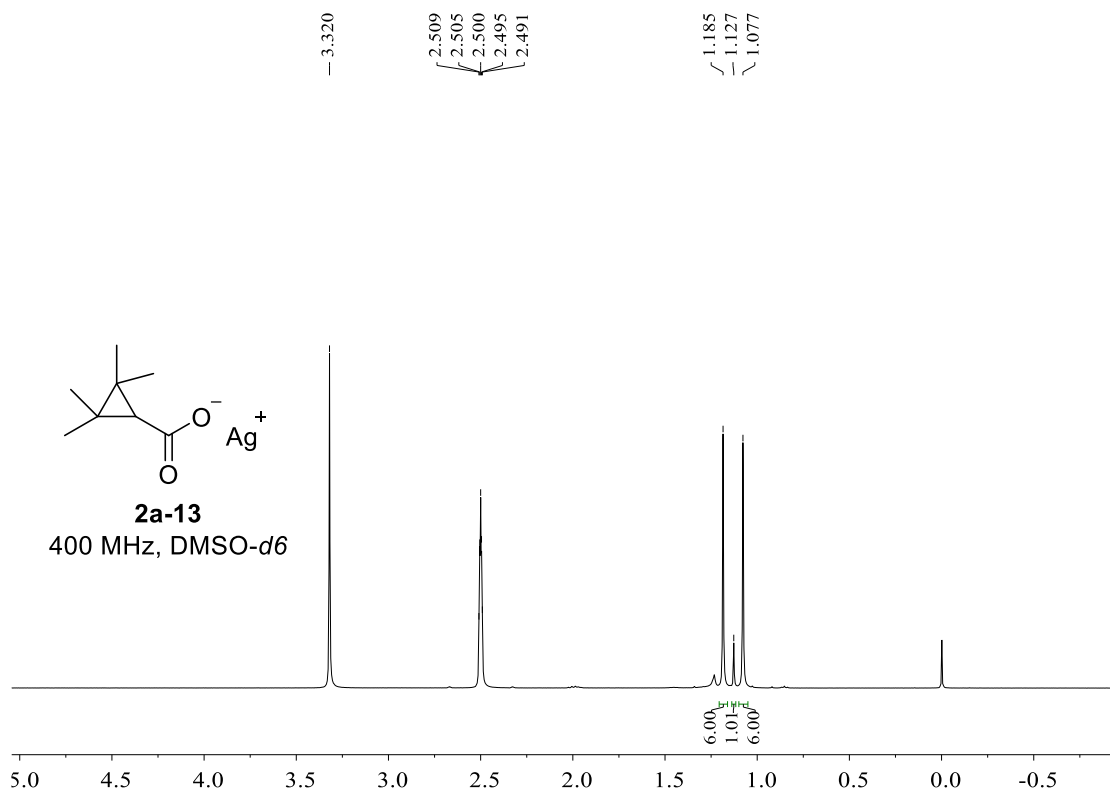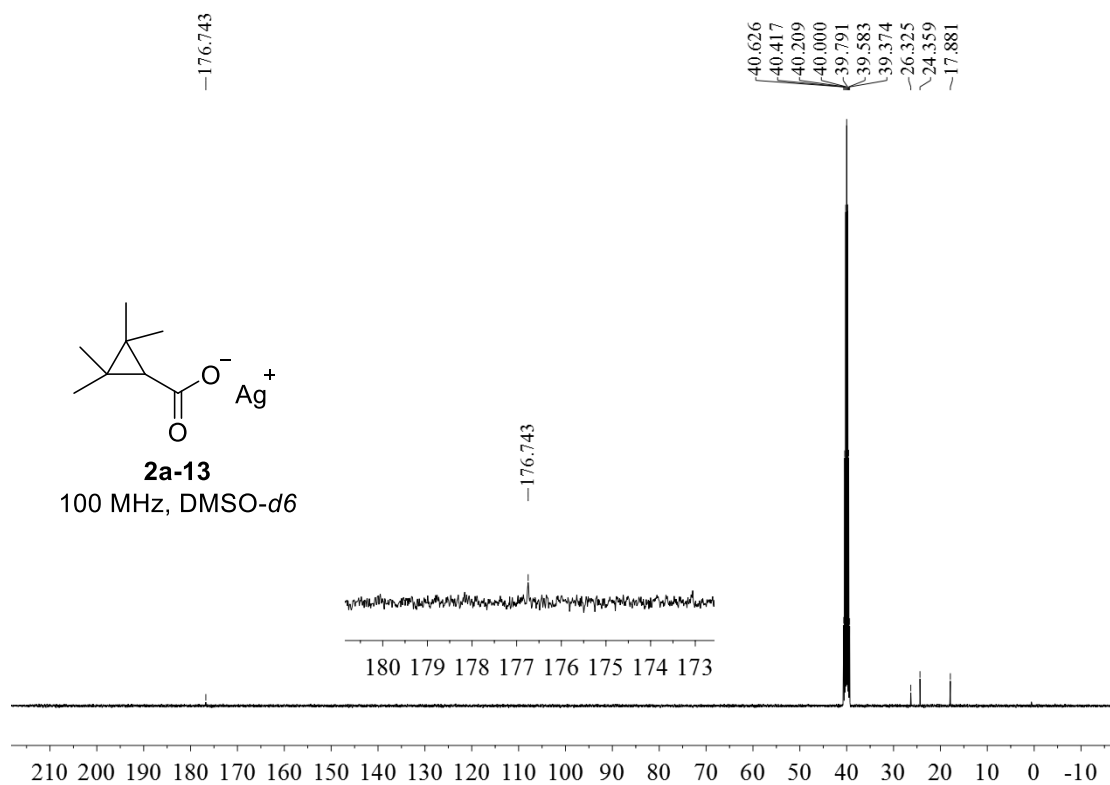



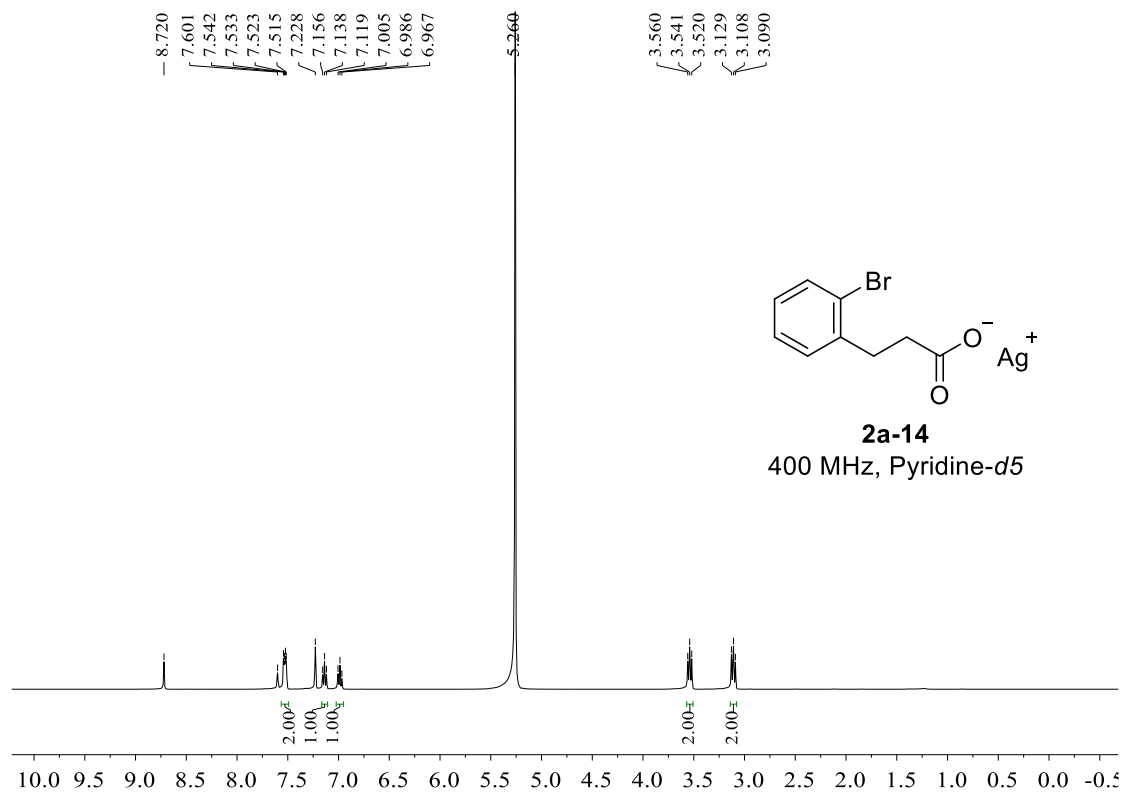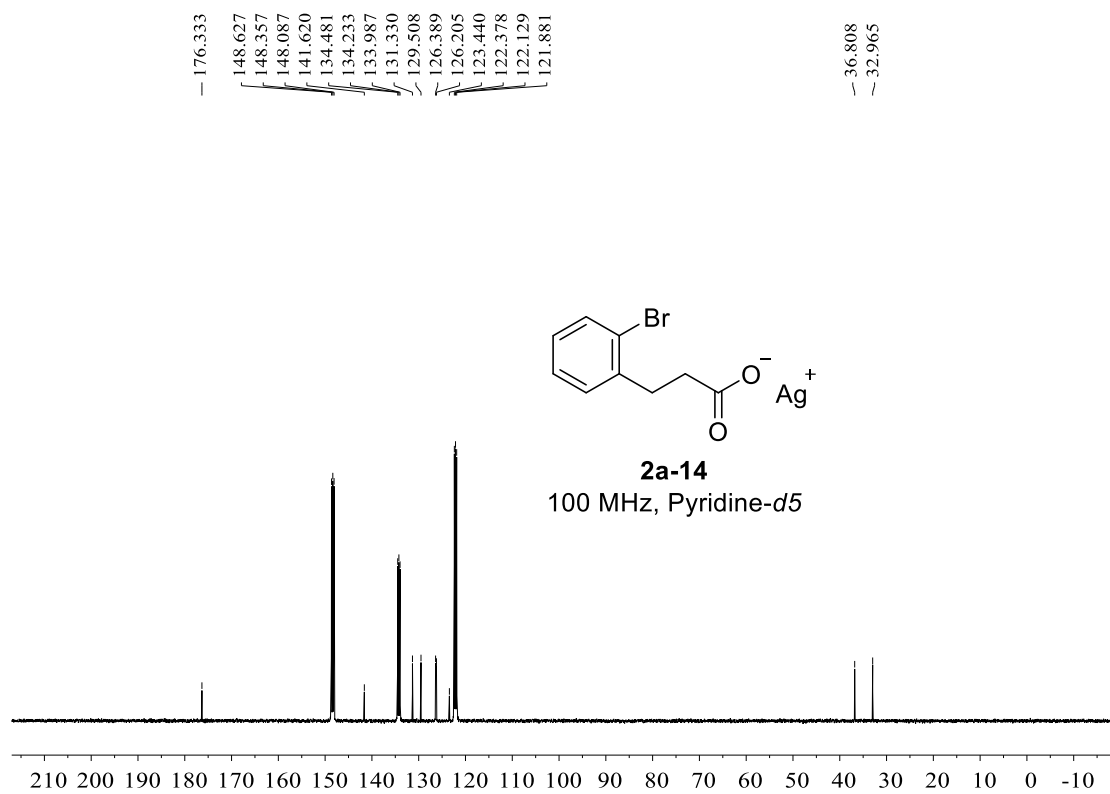

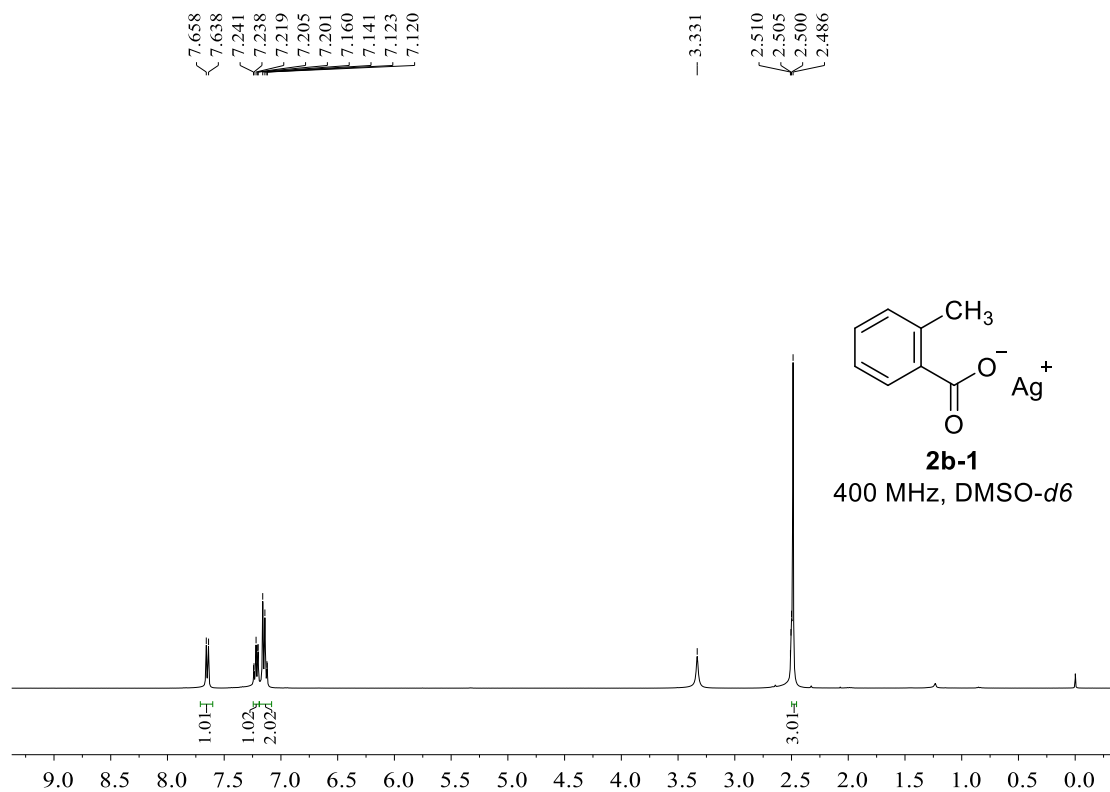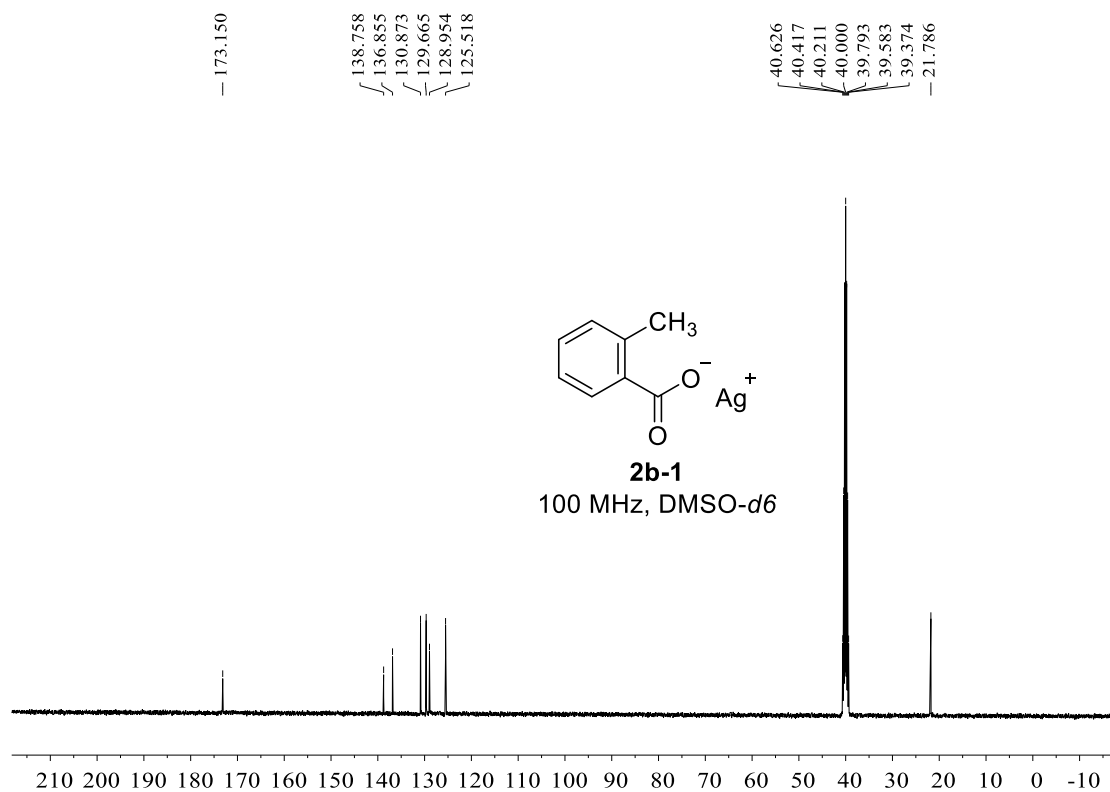

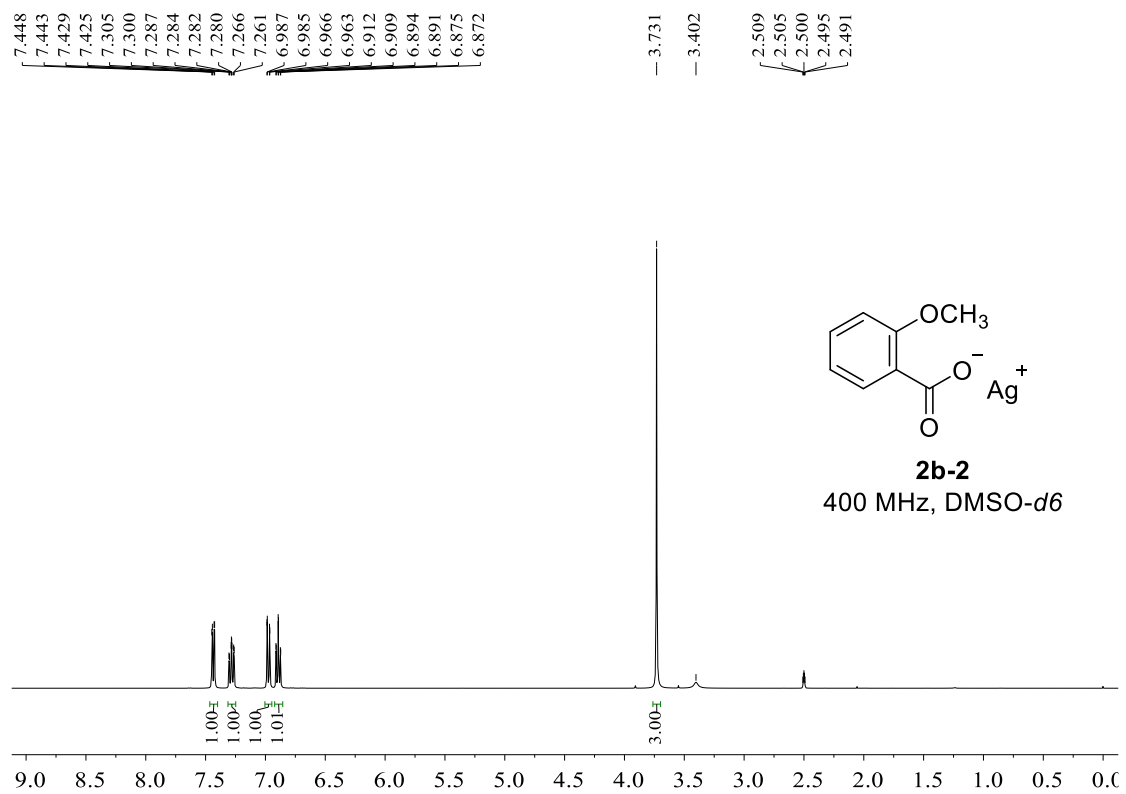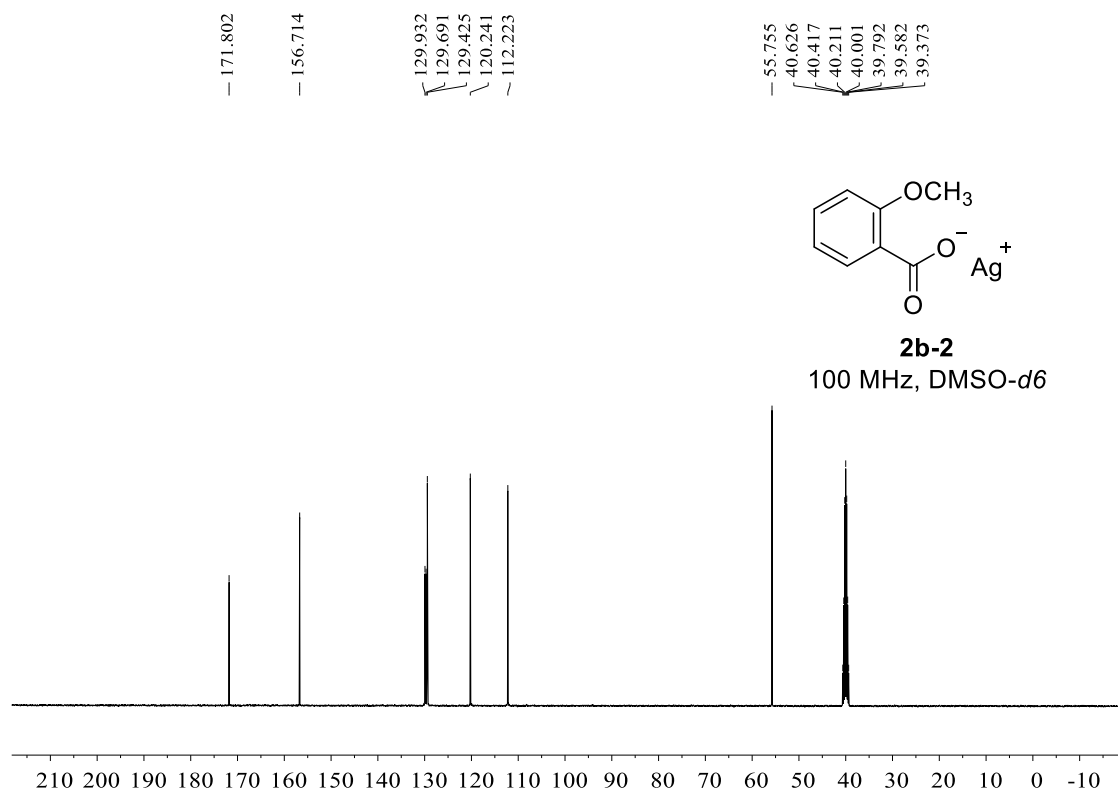

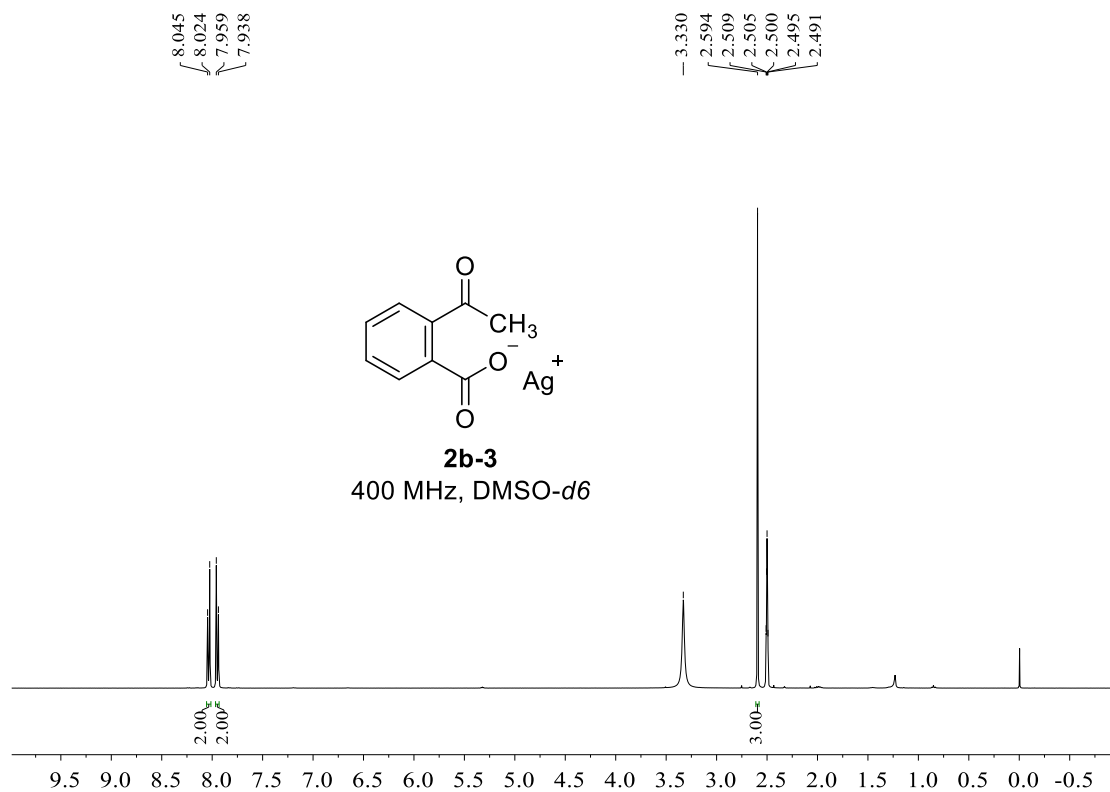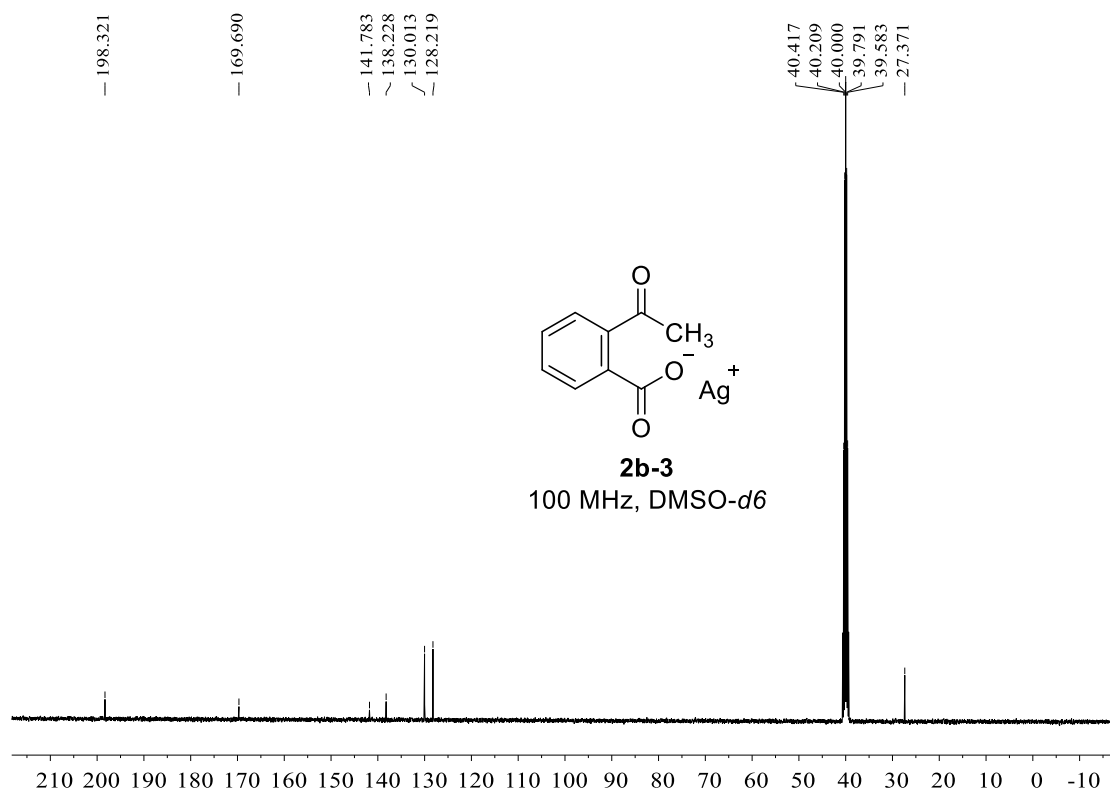

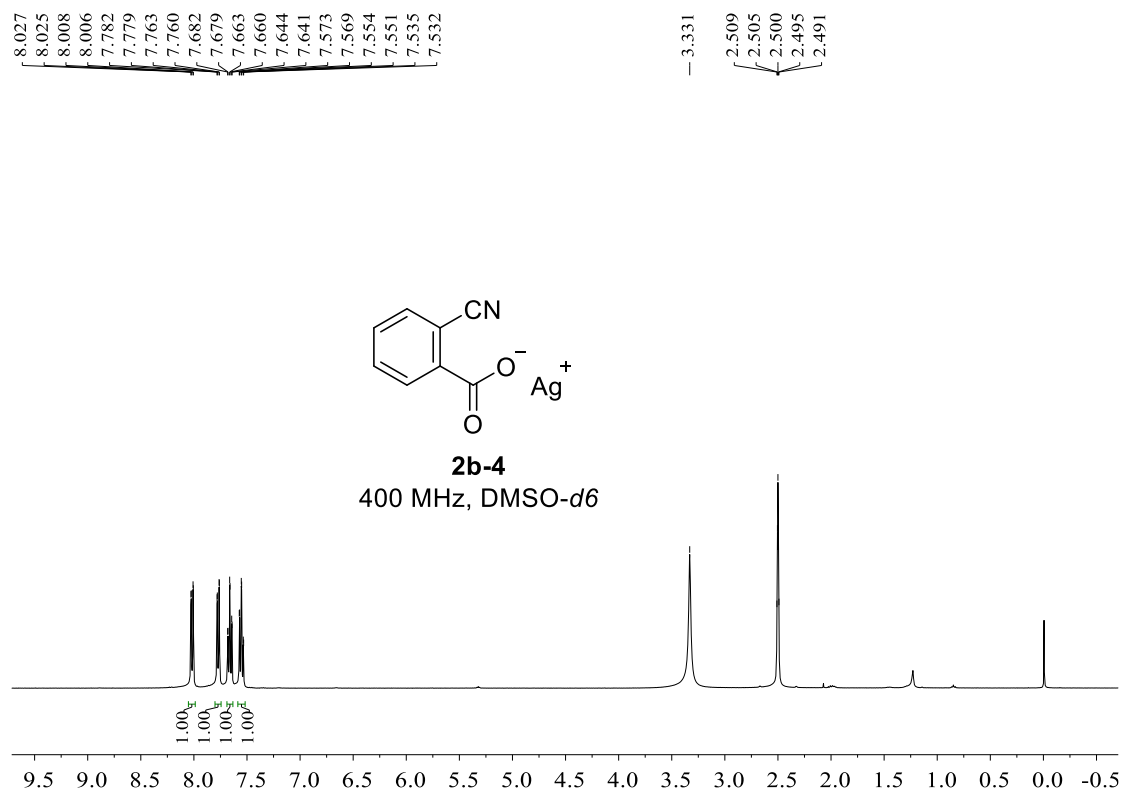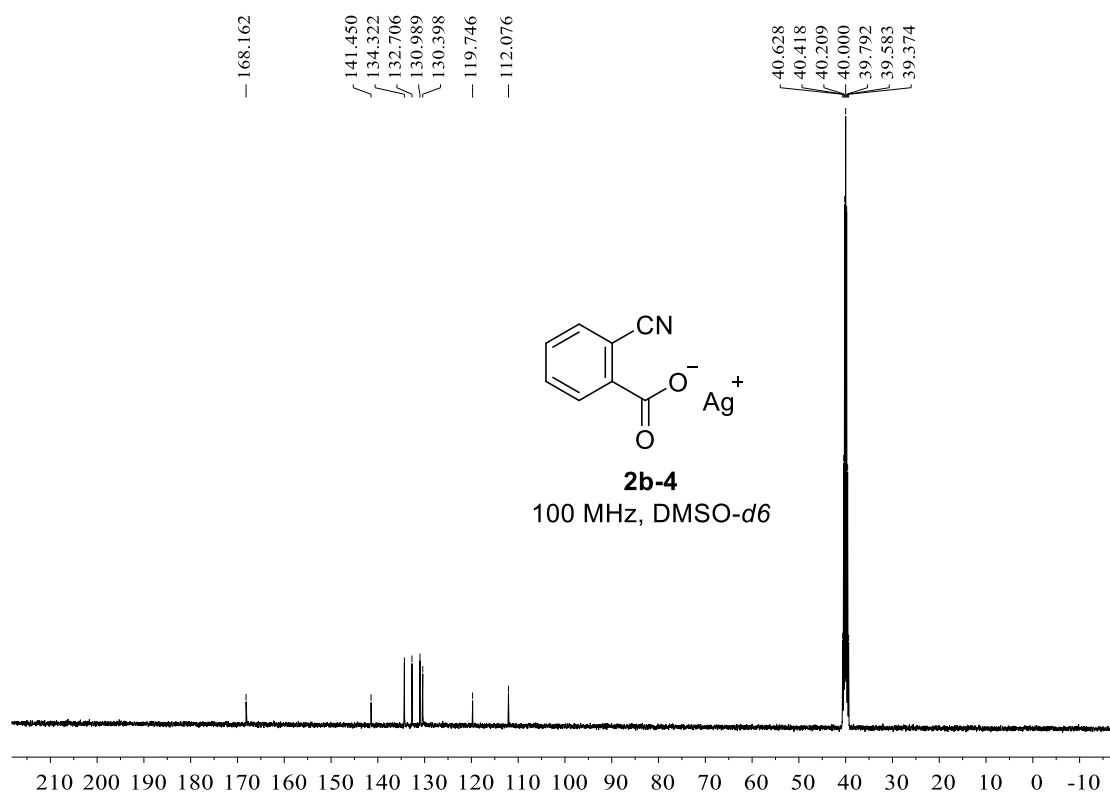

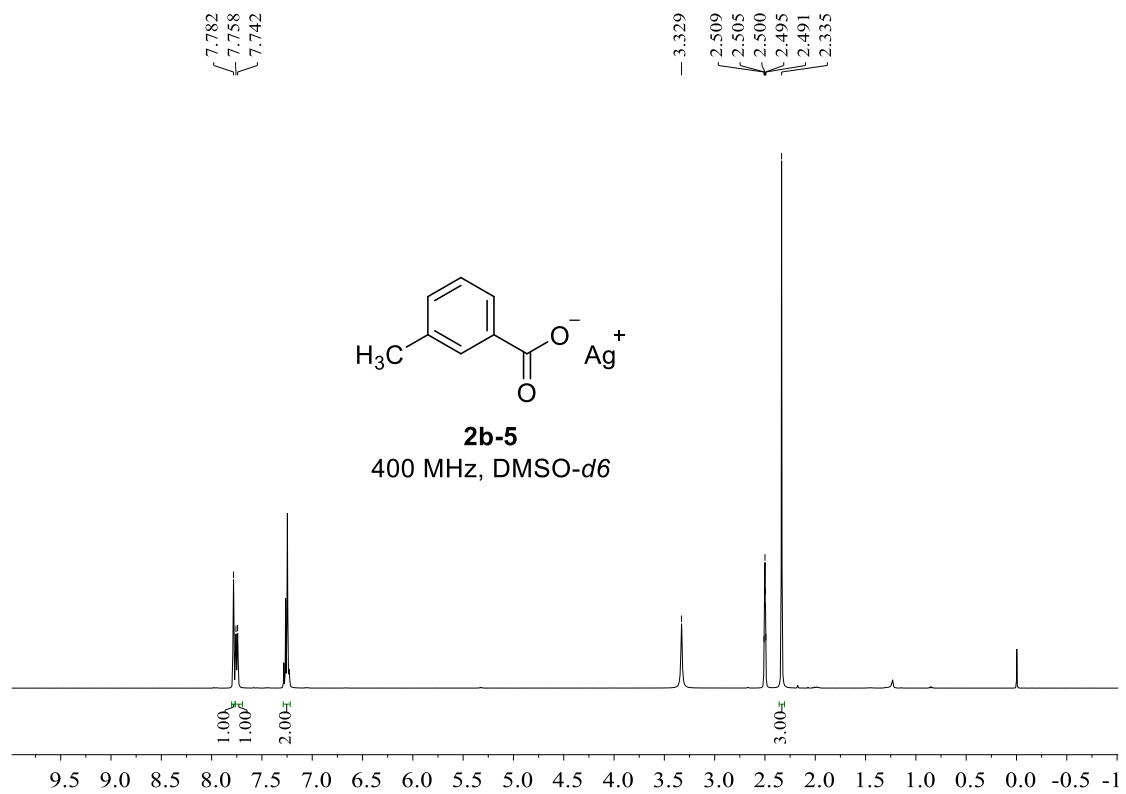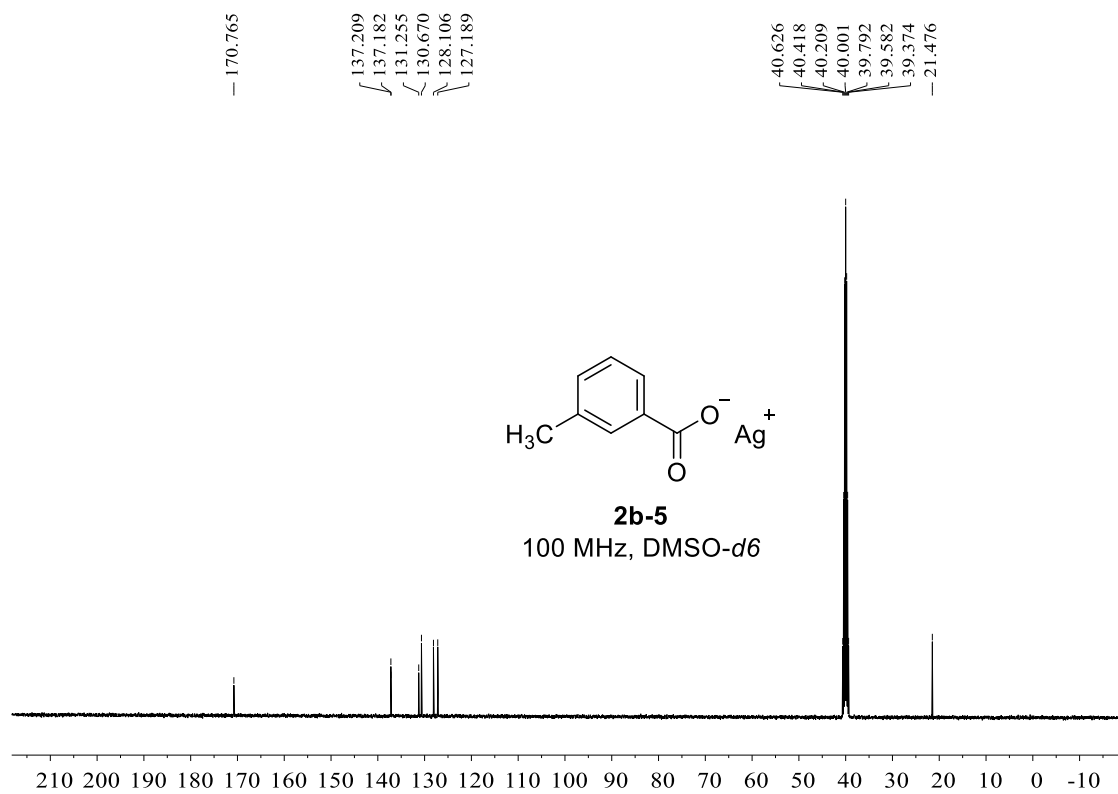

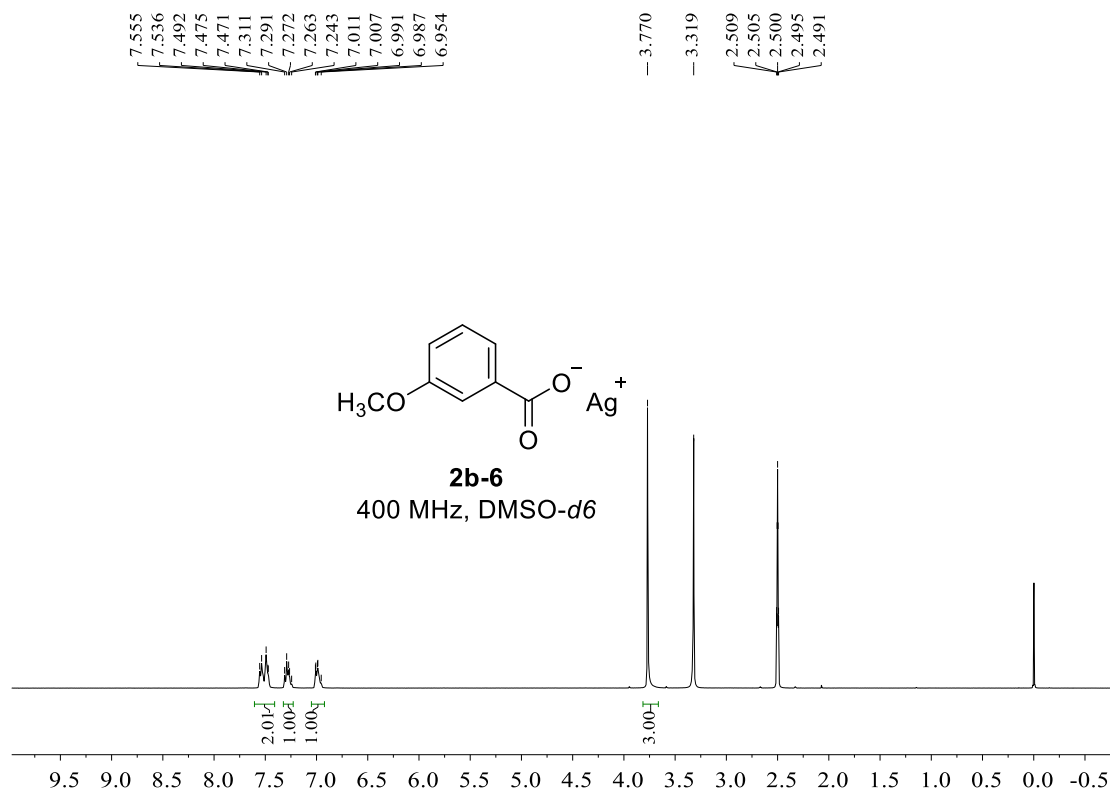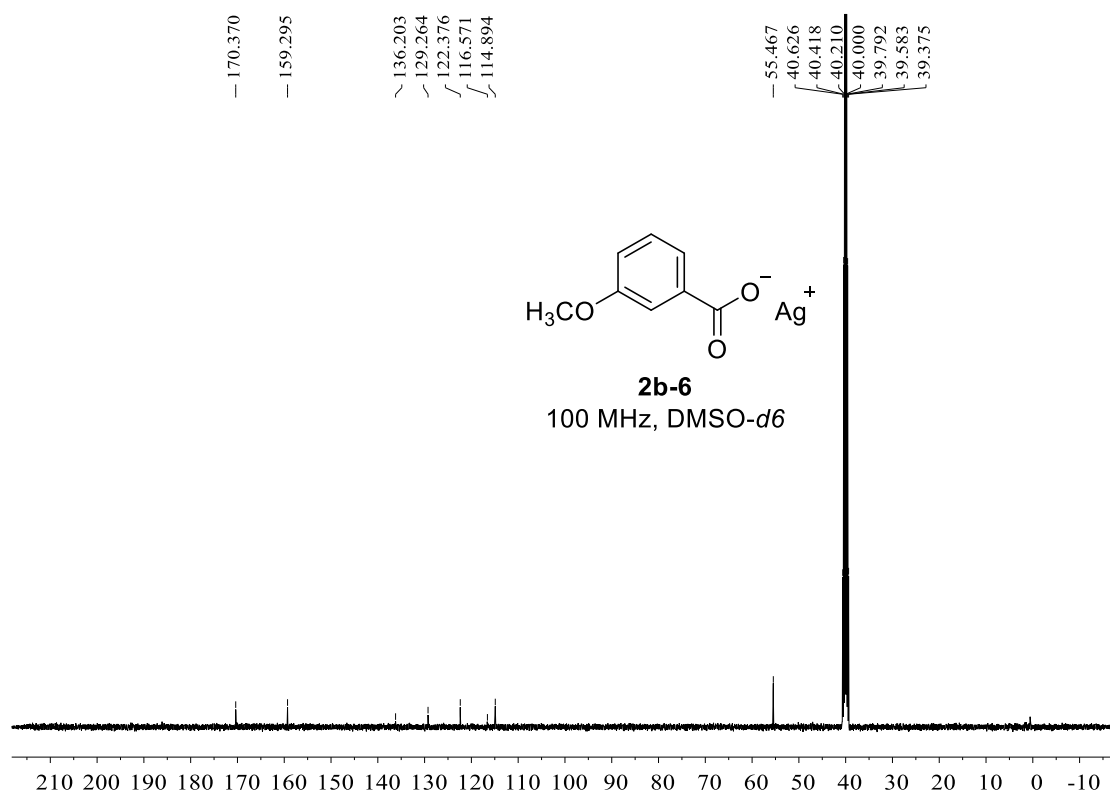

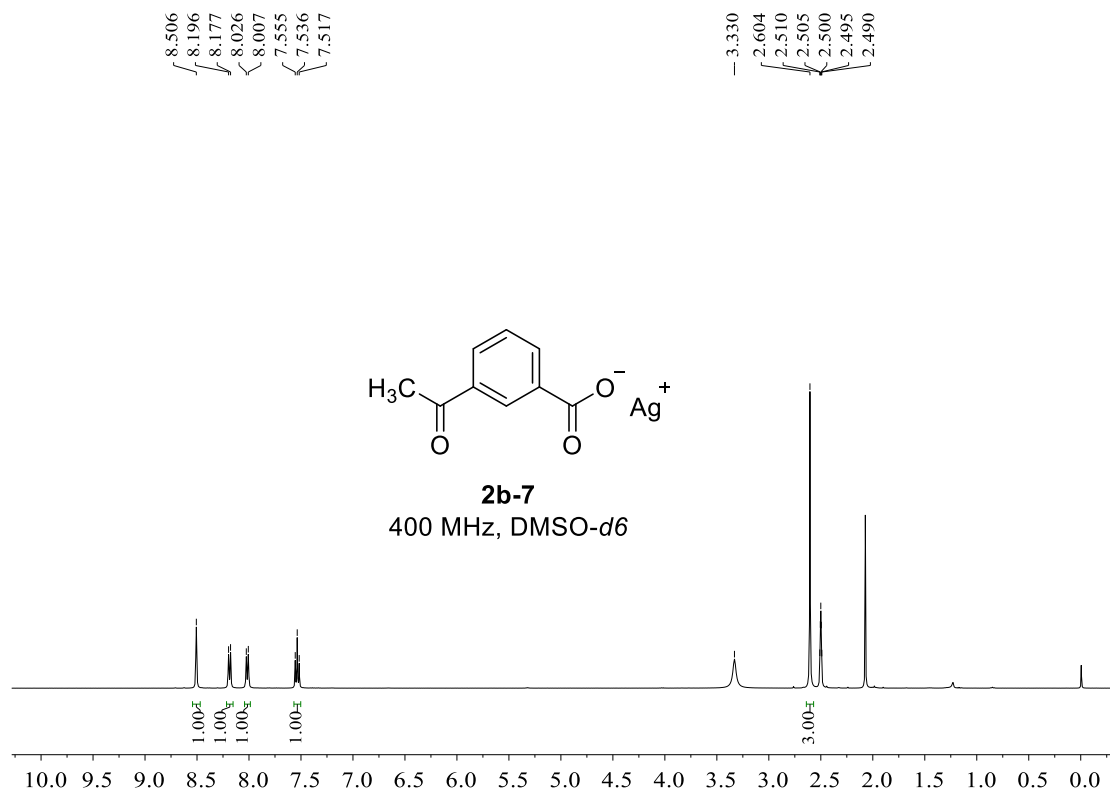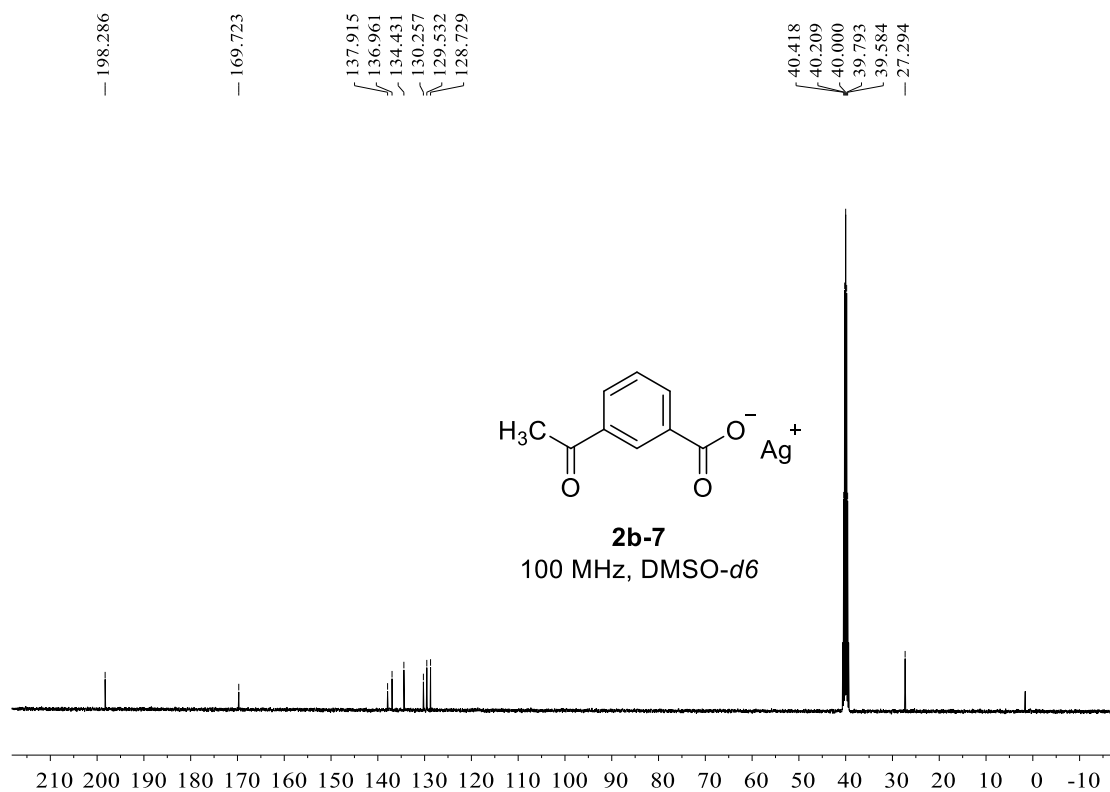



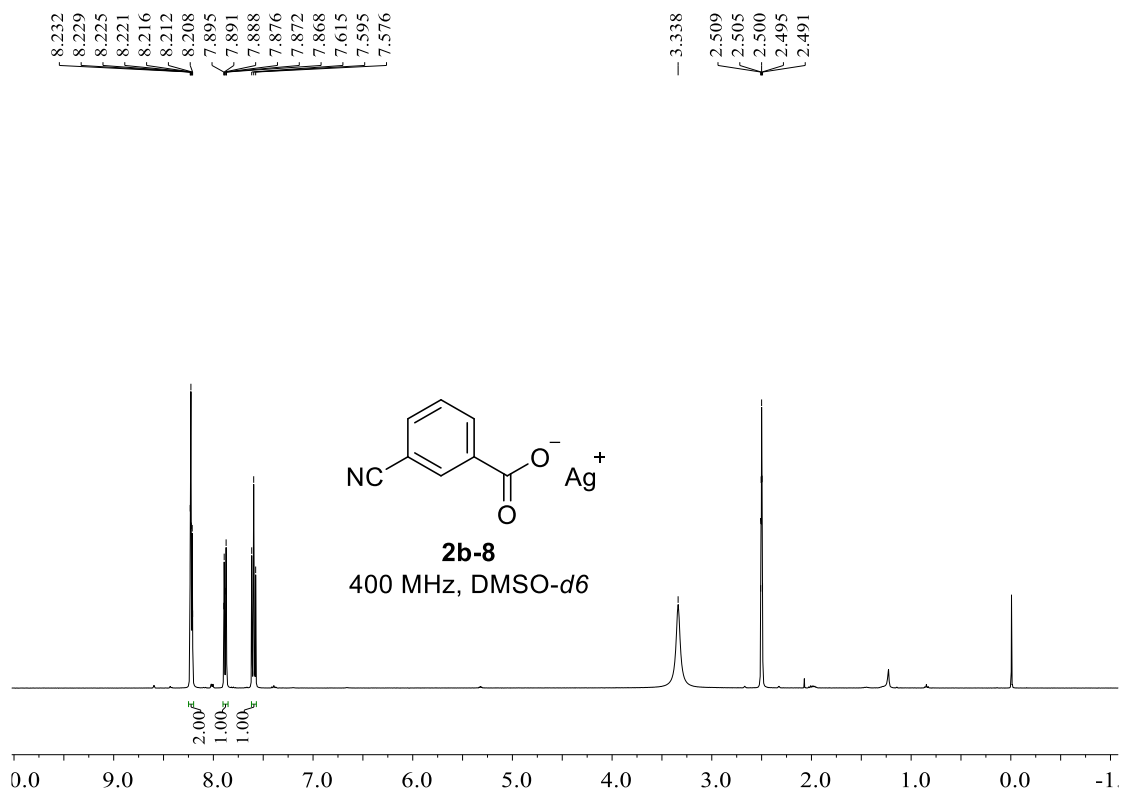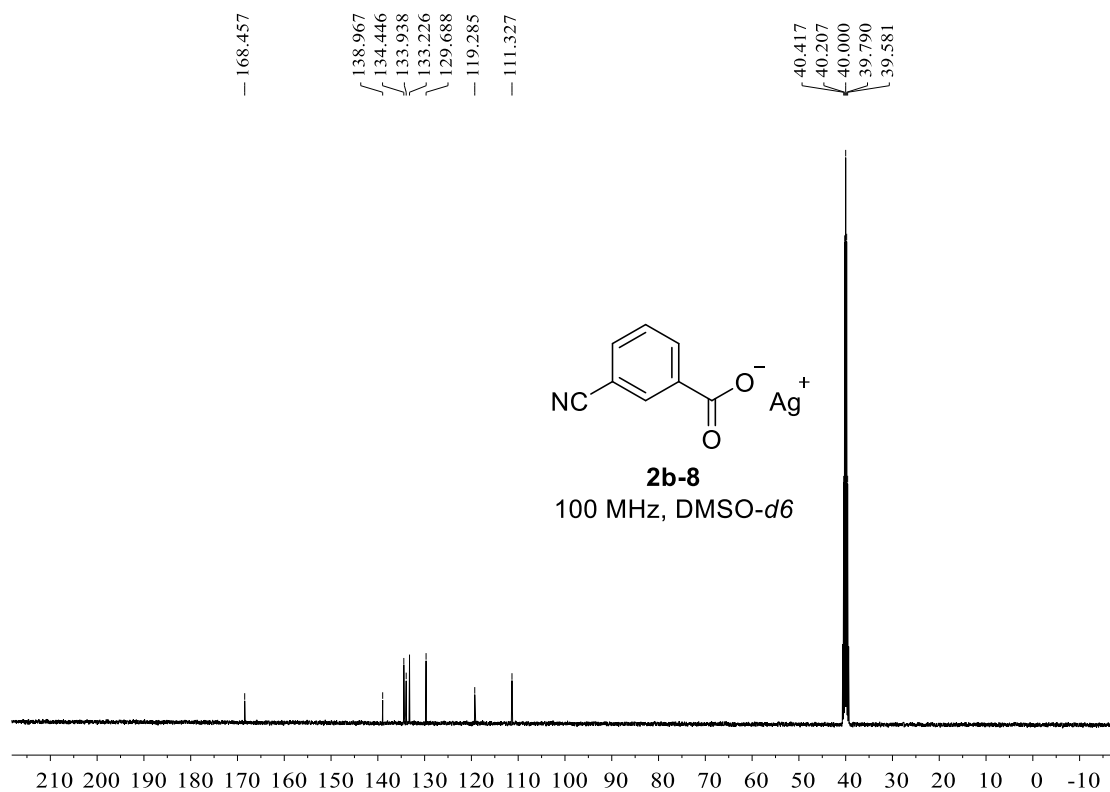

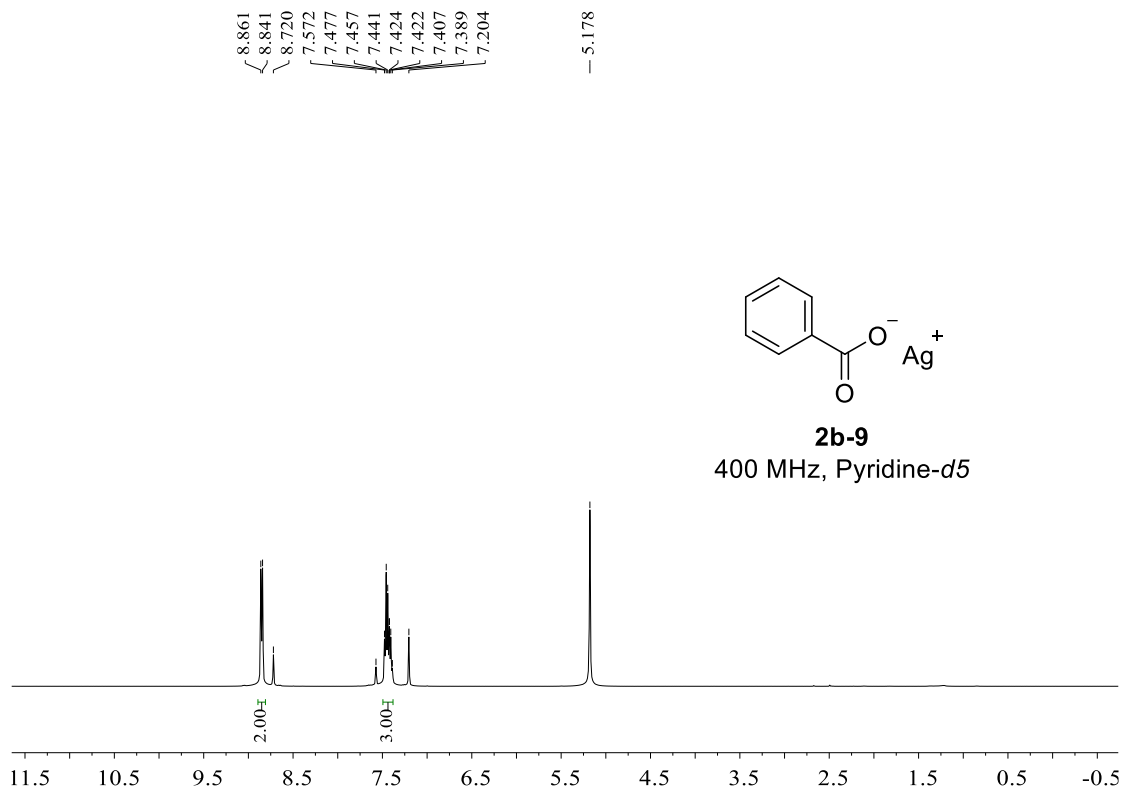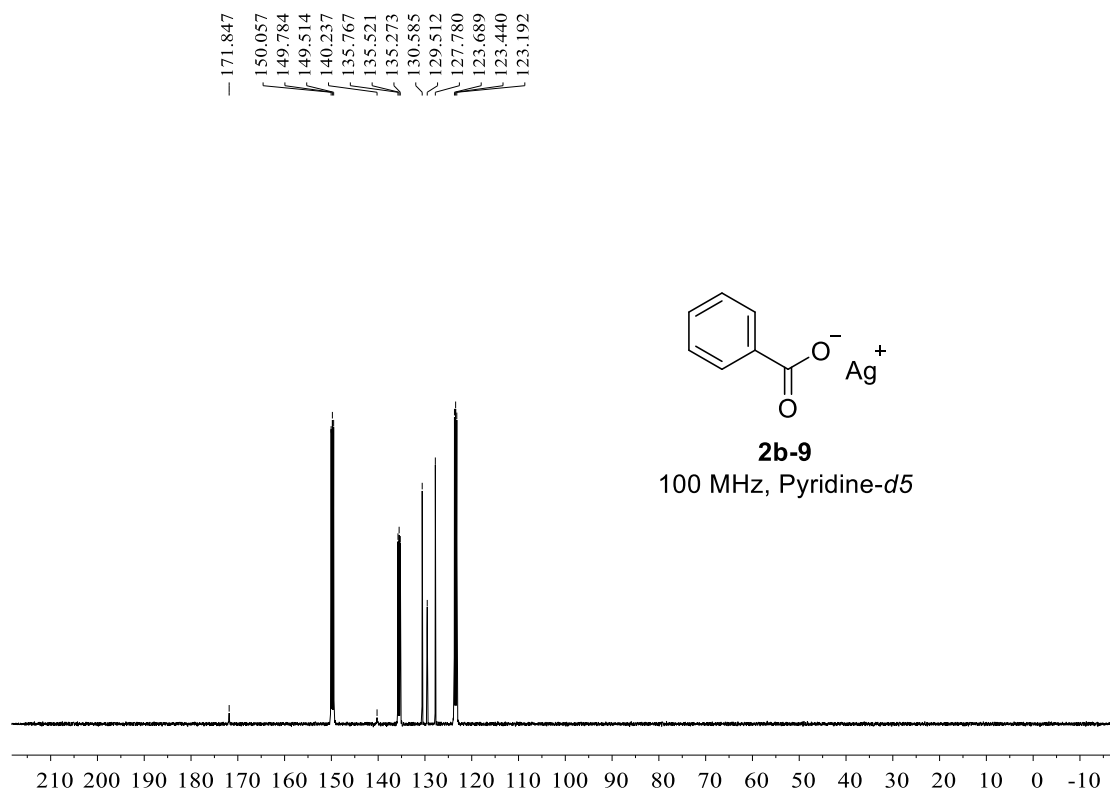

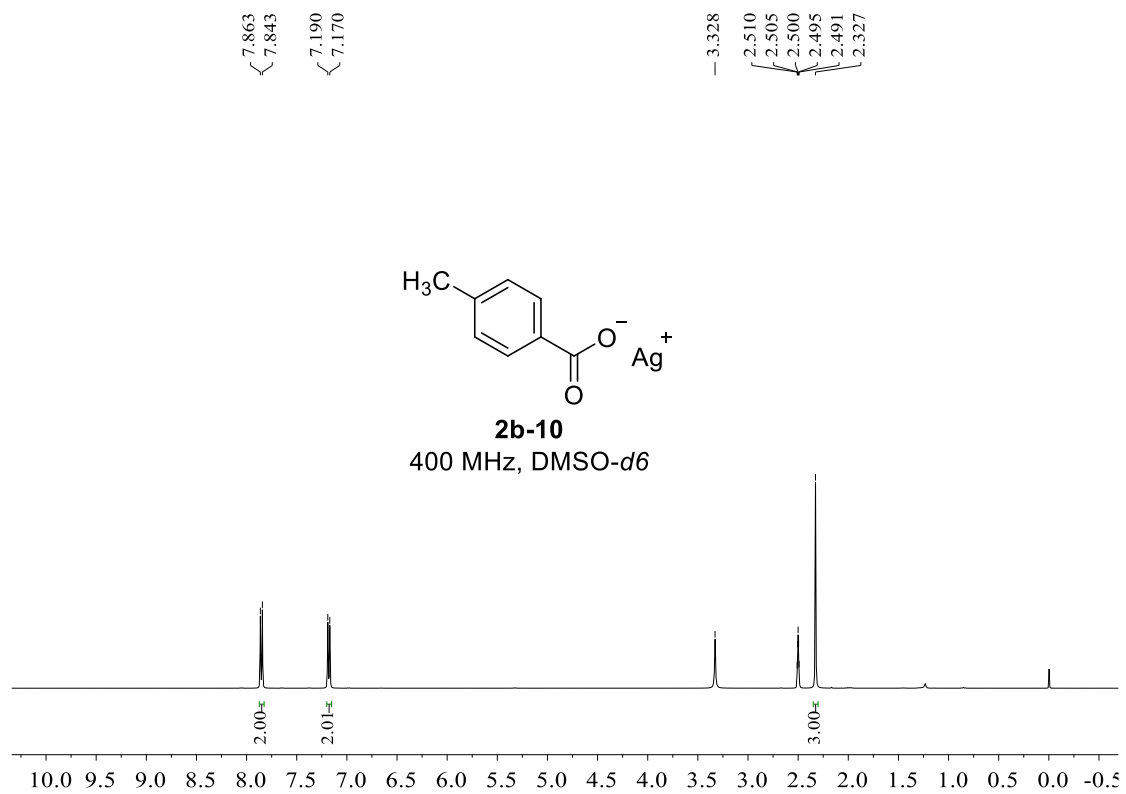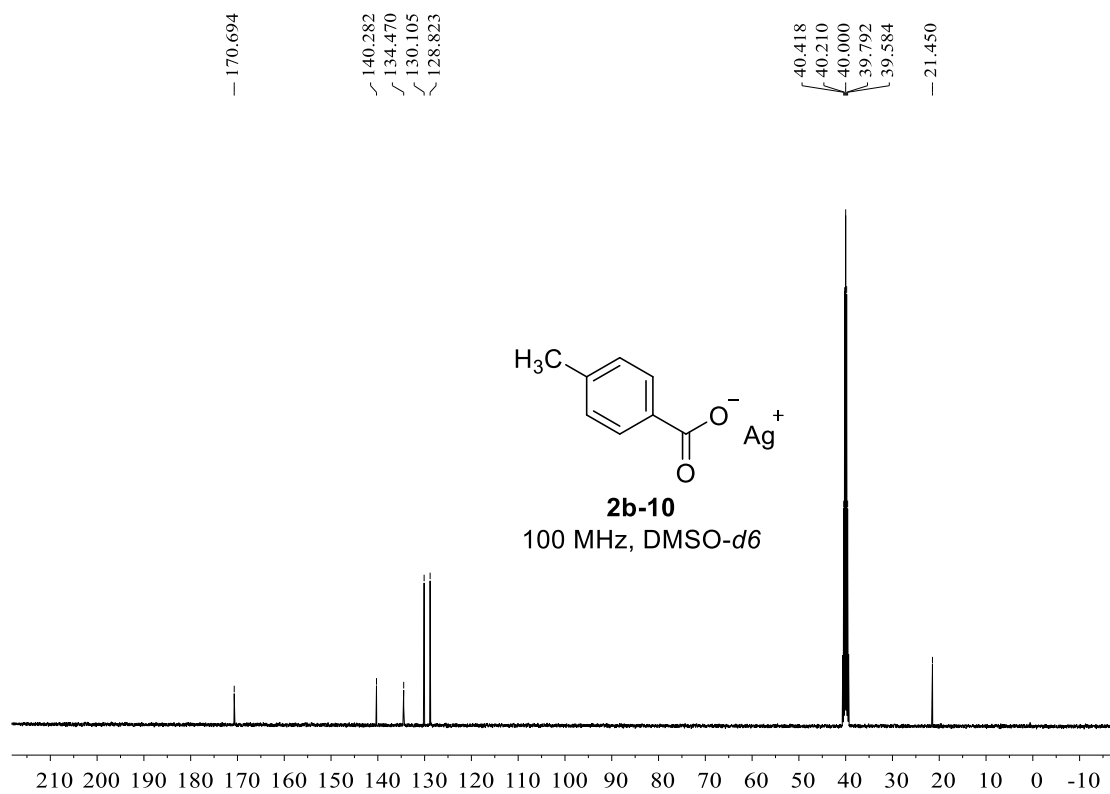

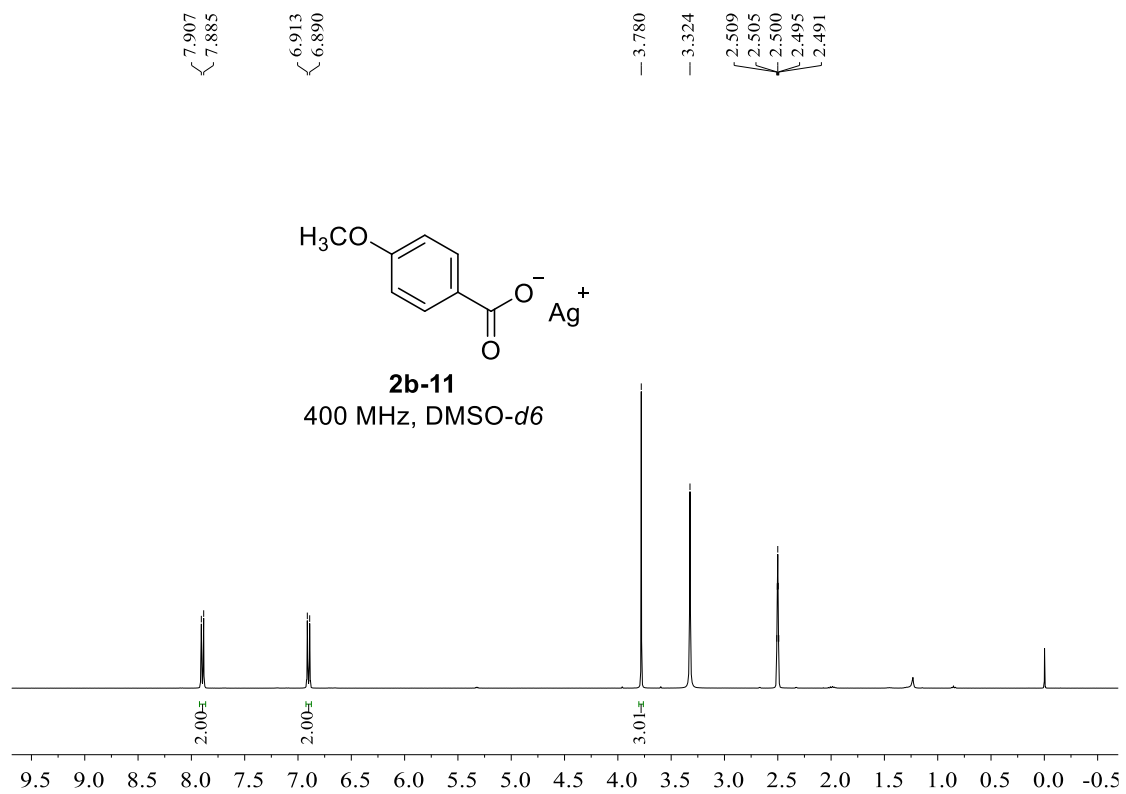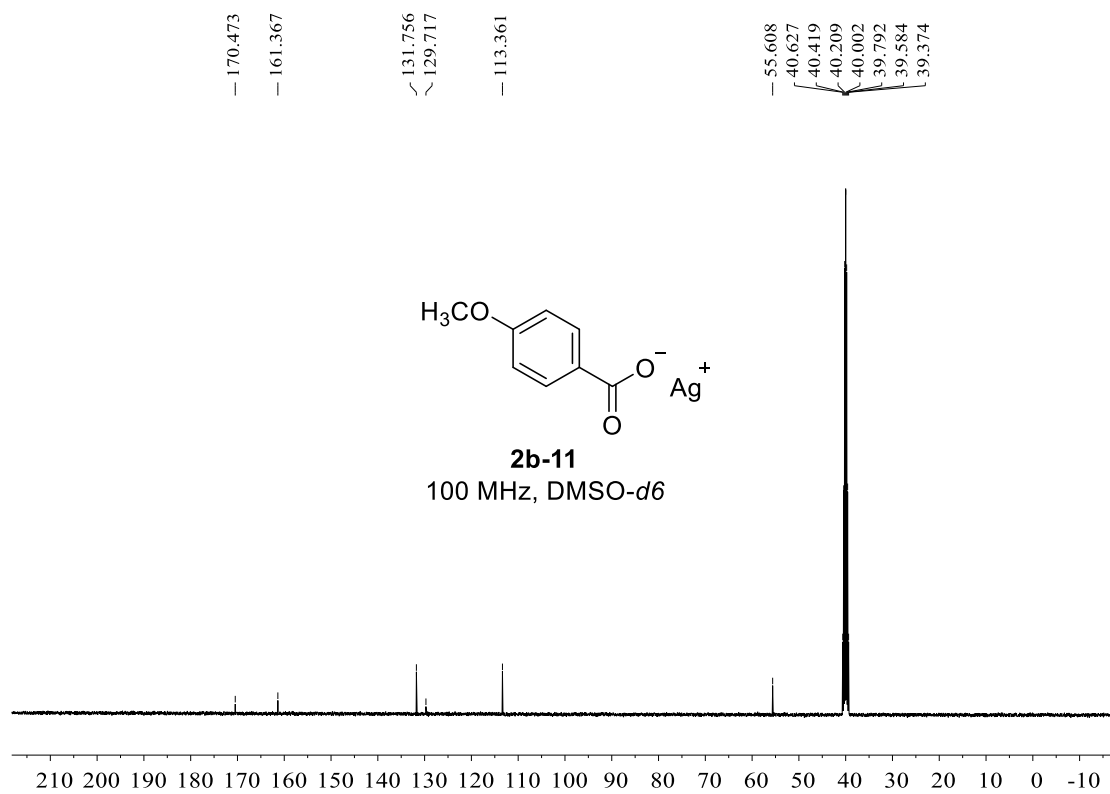

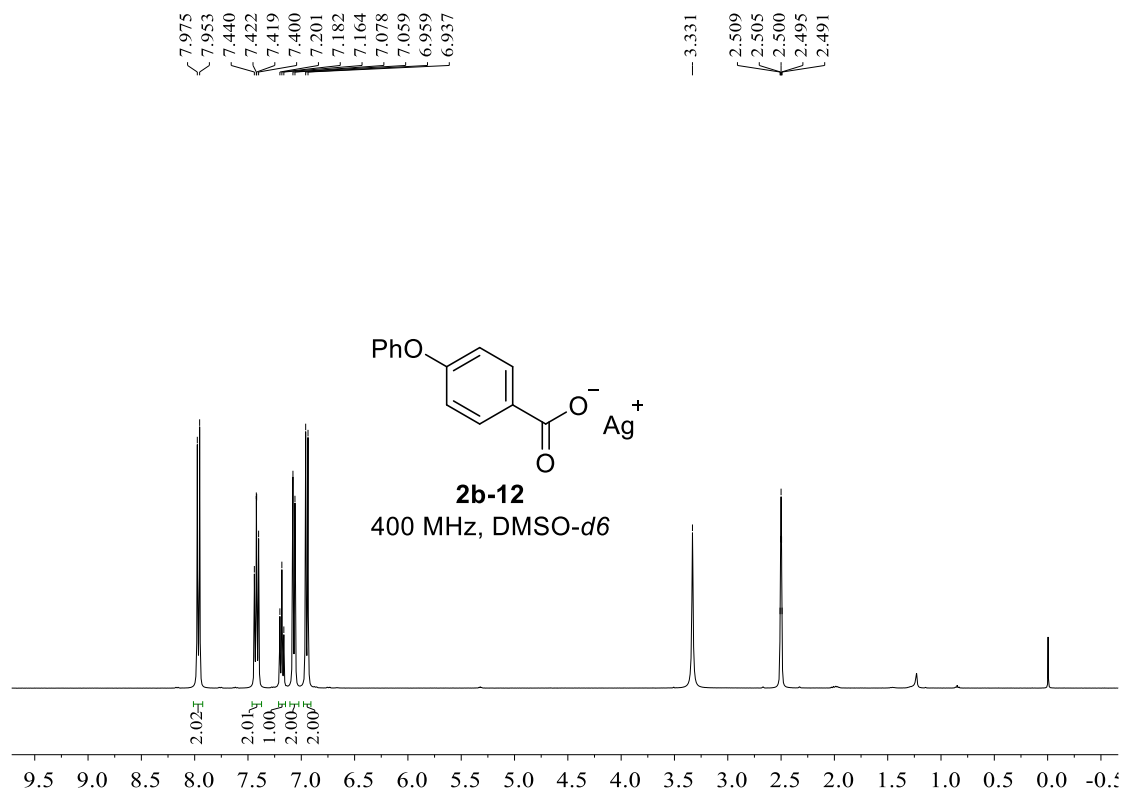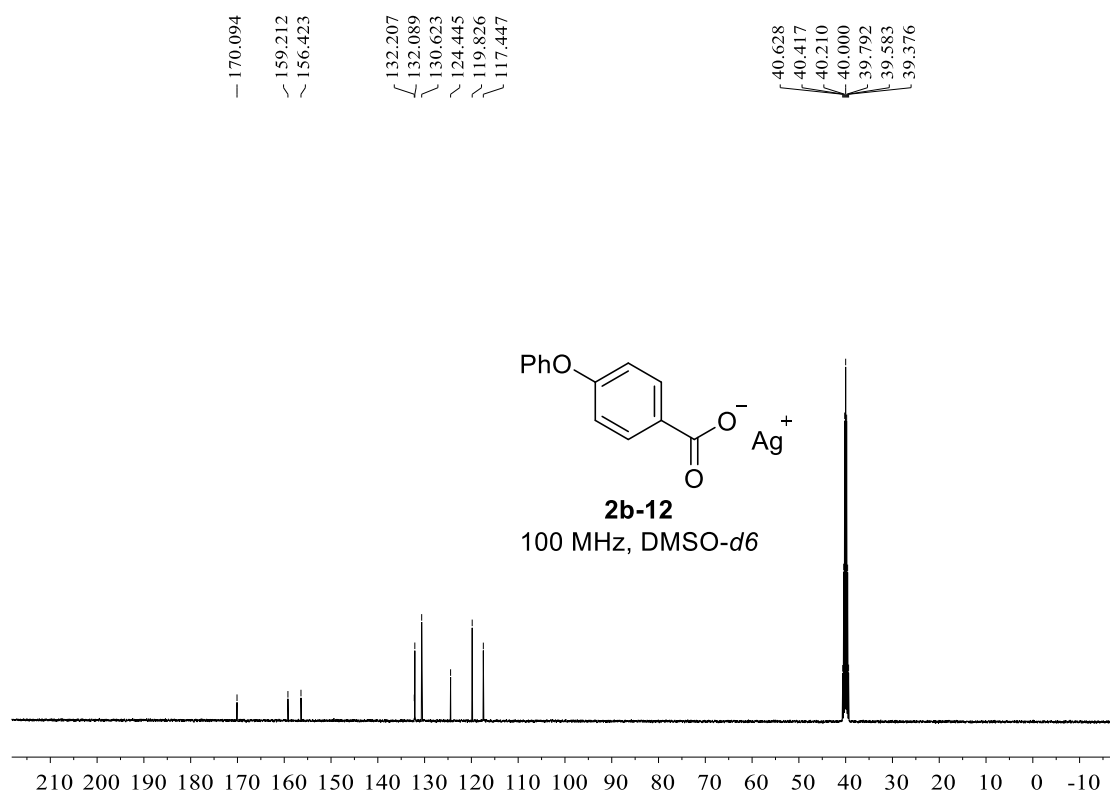

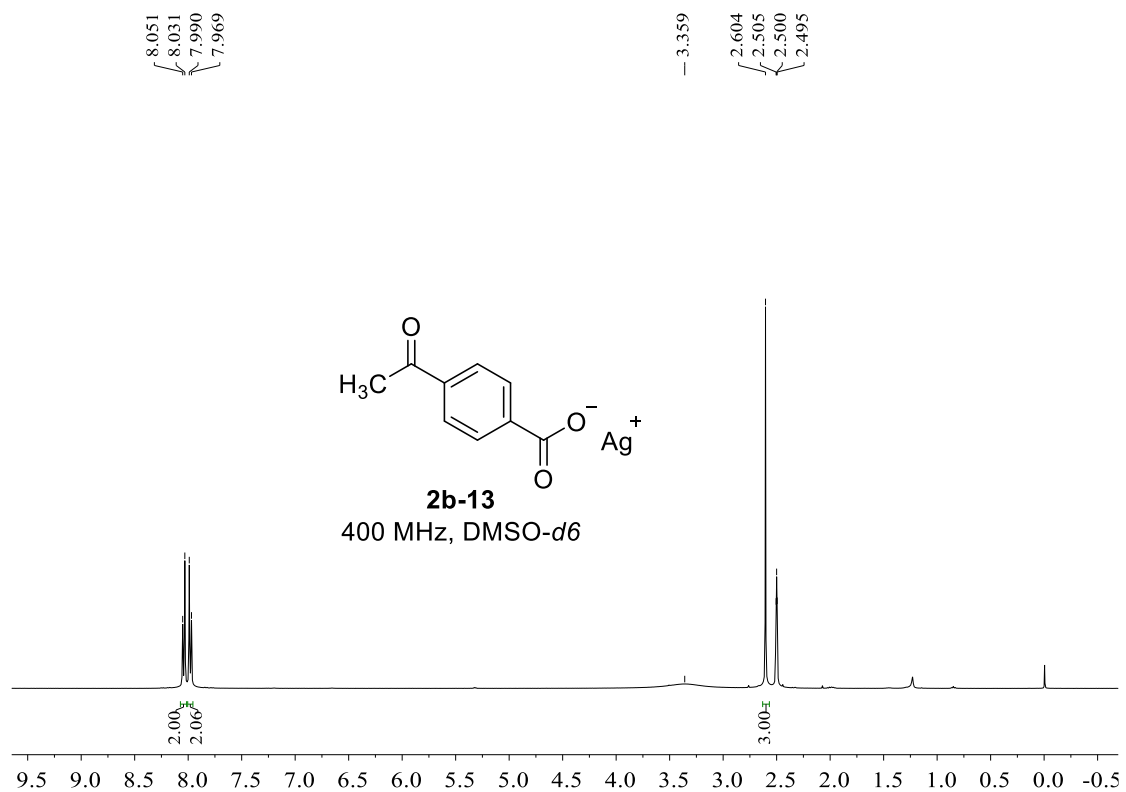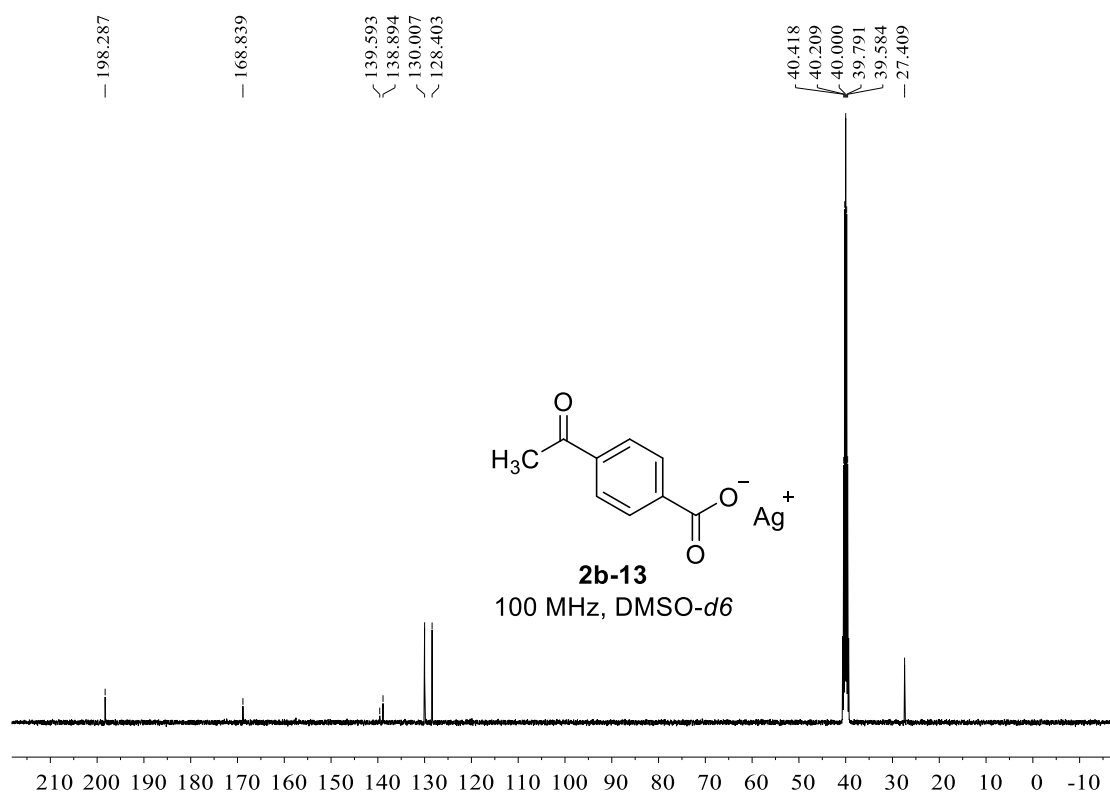

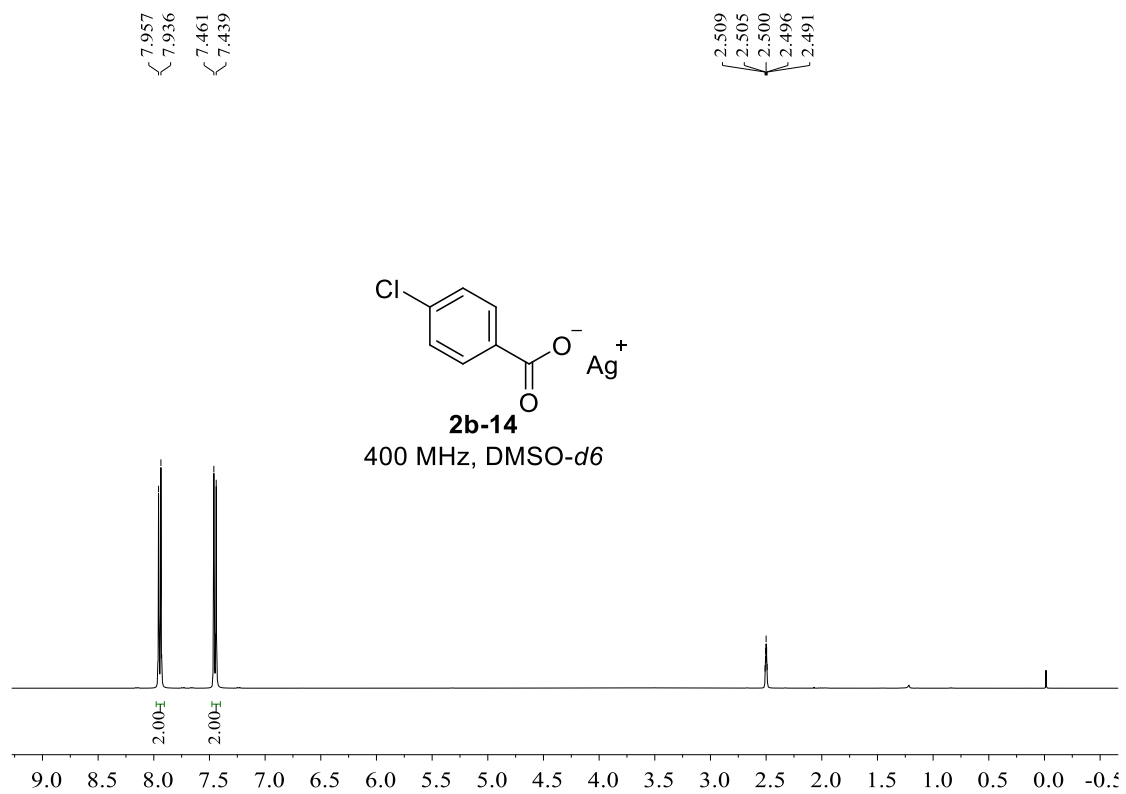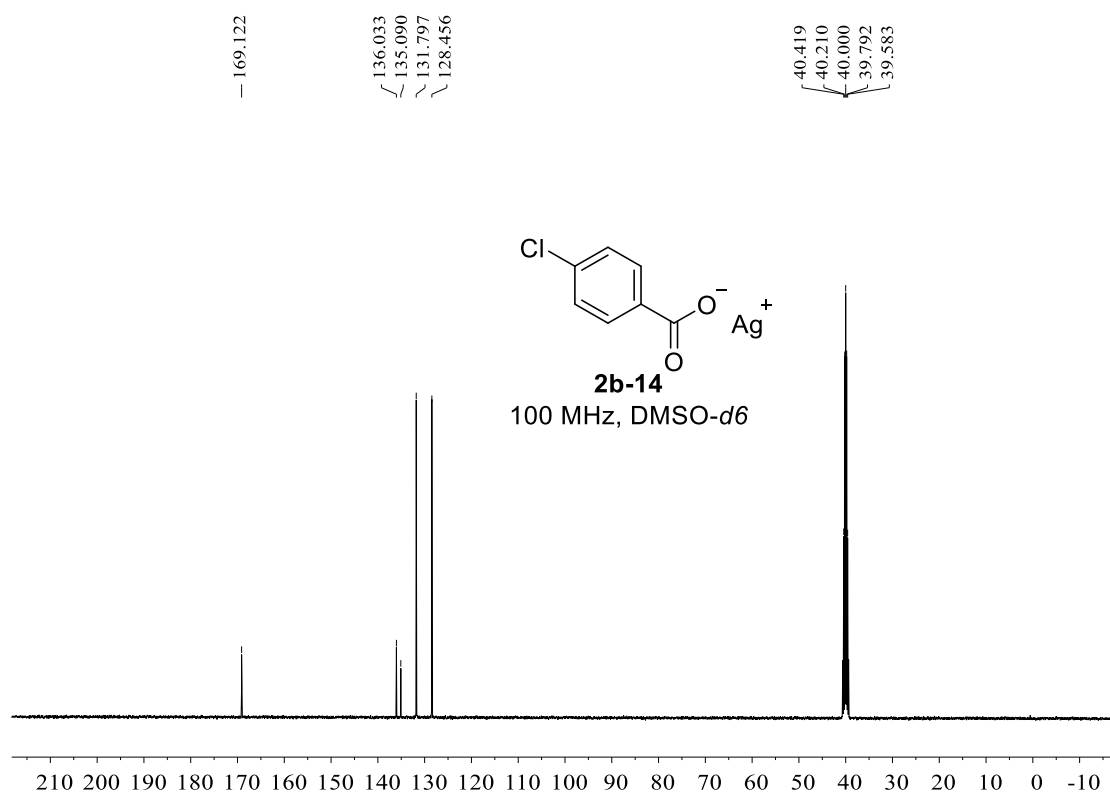

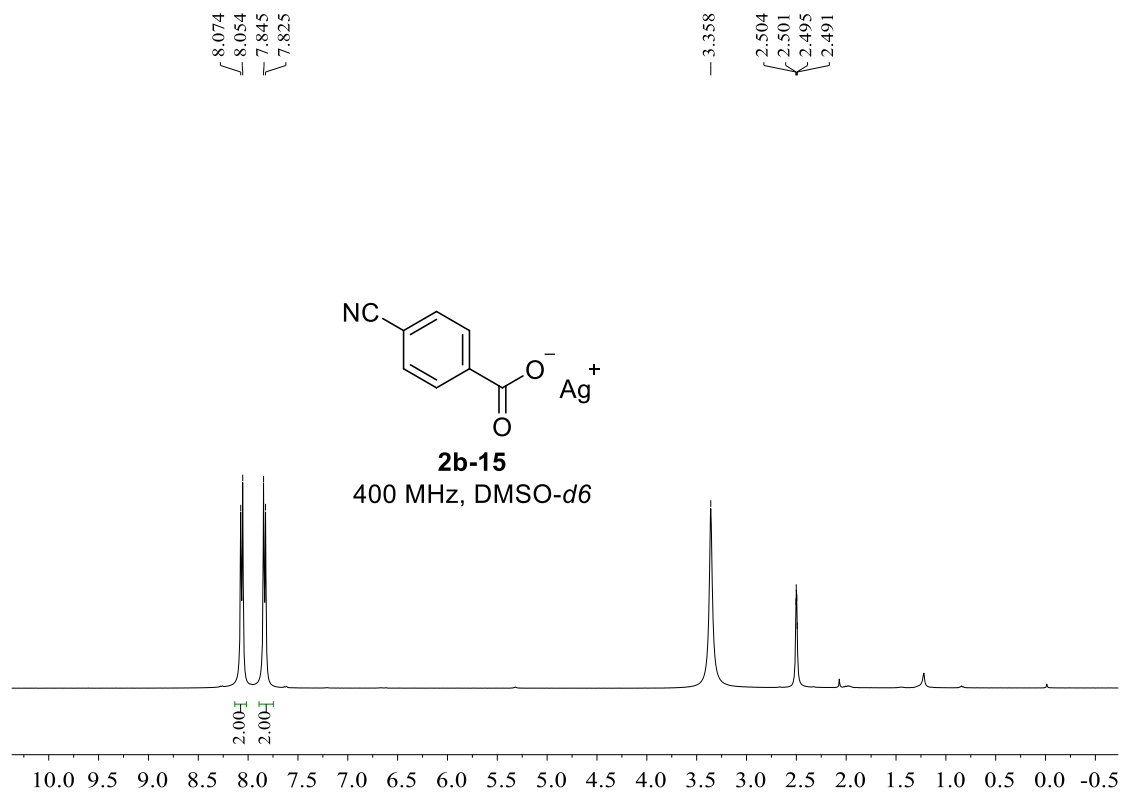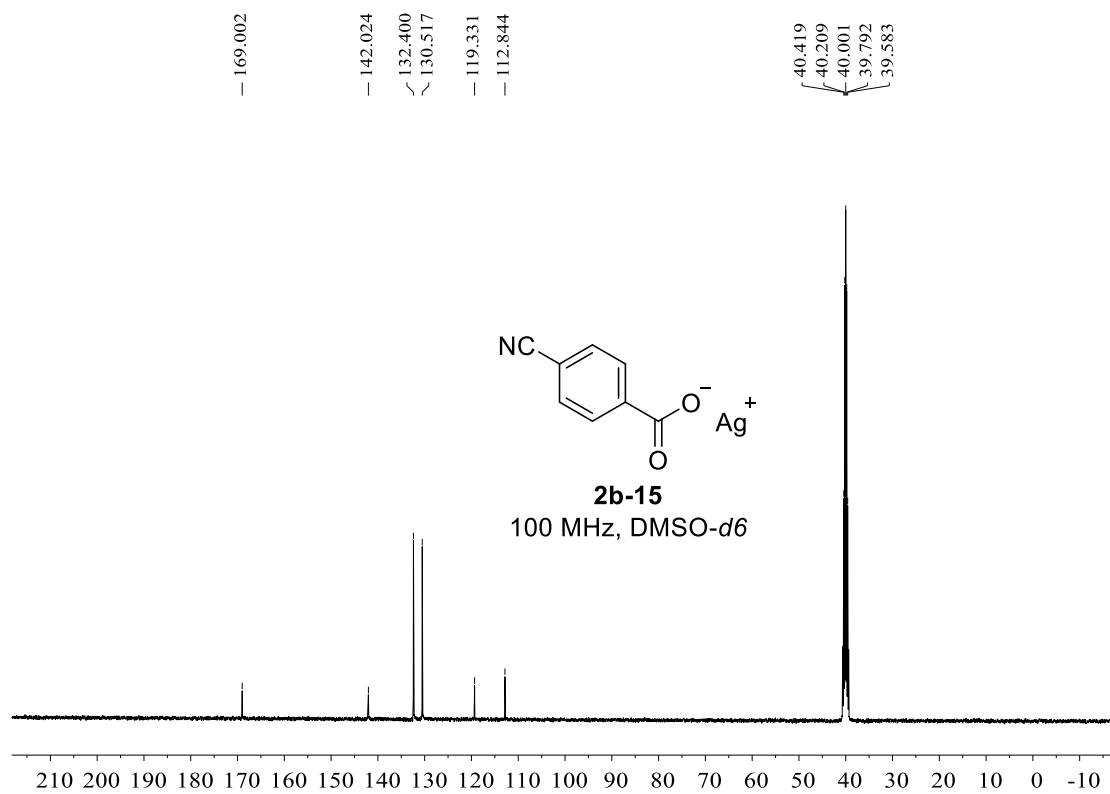



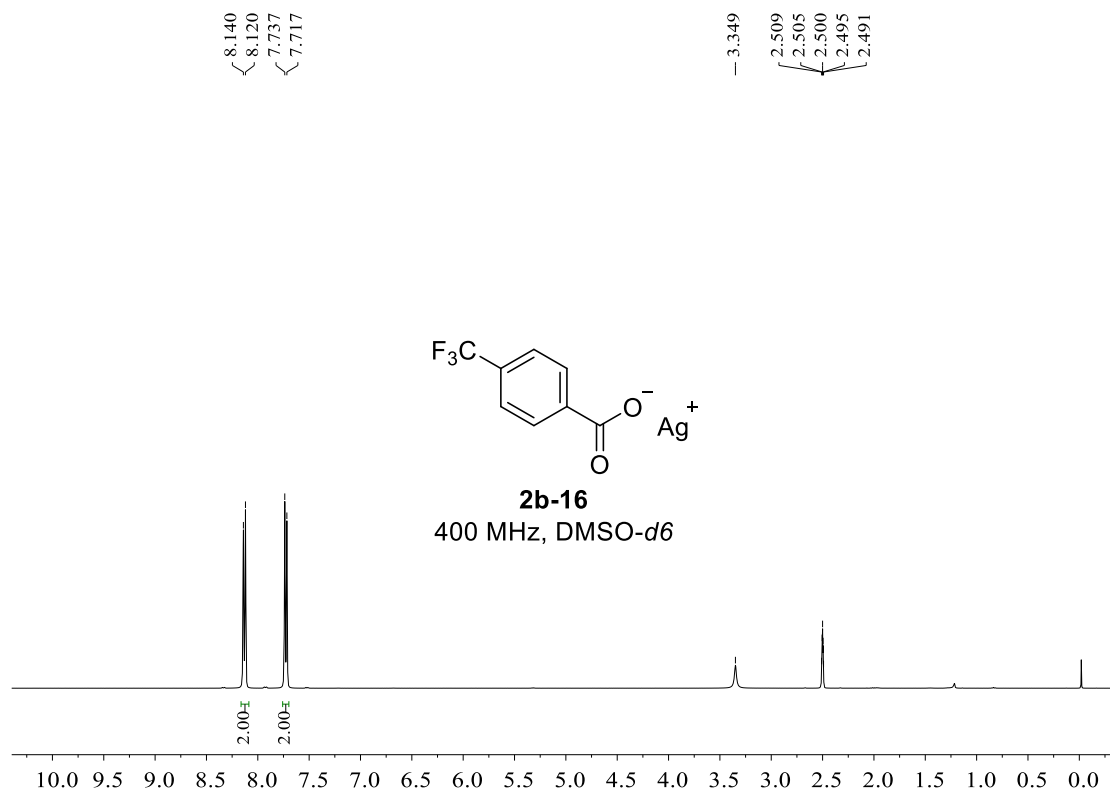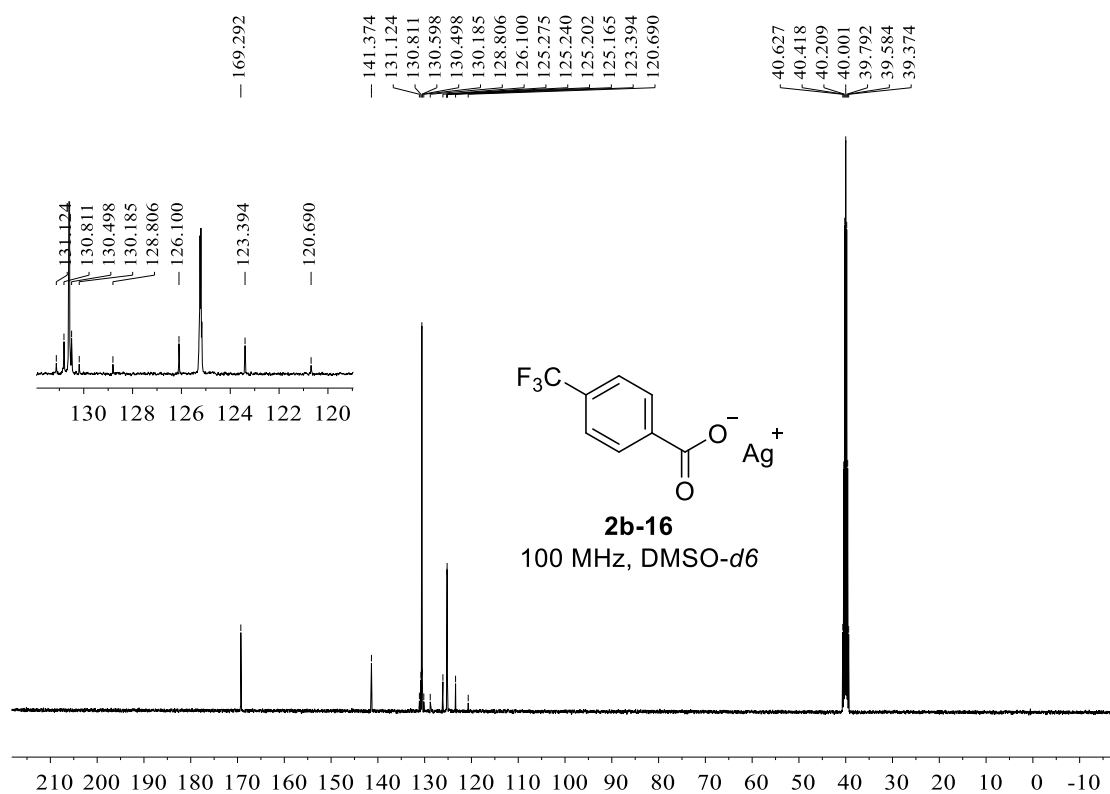

--61.108

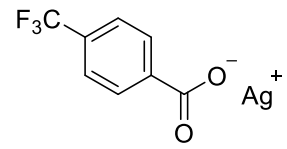

**2b-16**

376 MHz, DMSO-*d*6

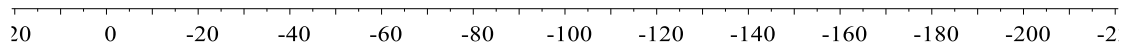

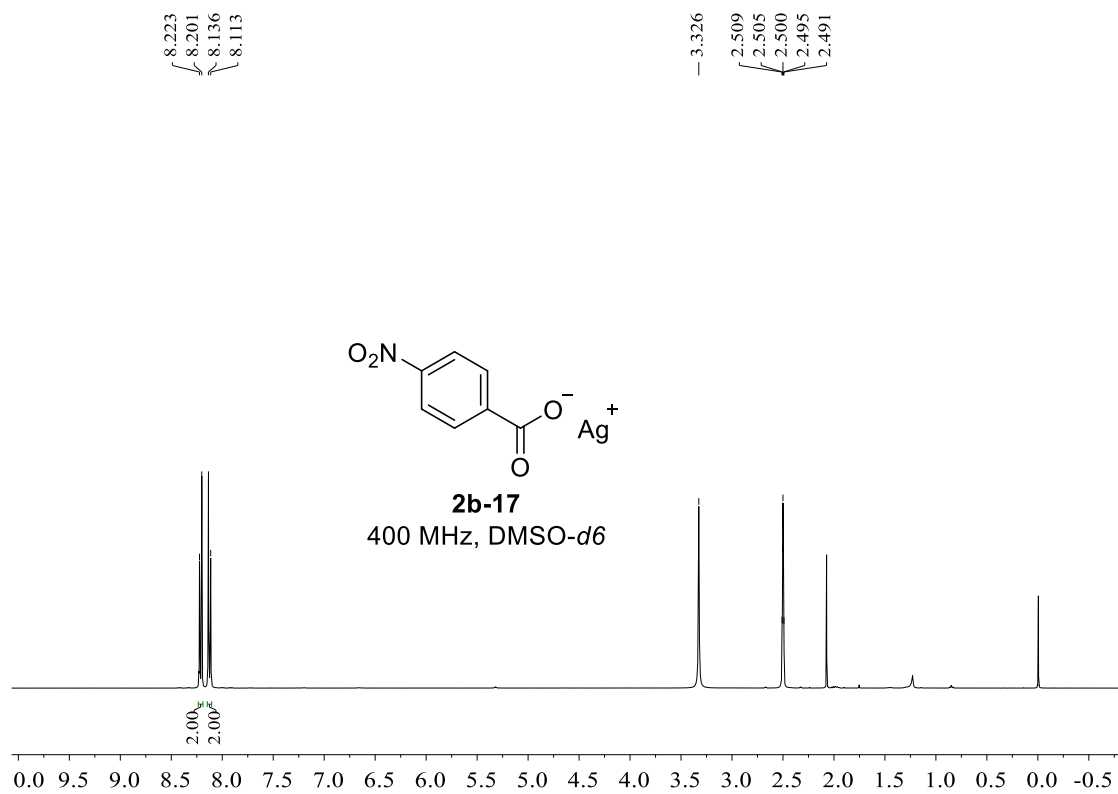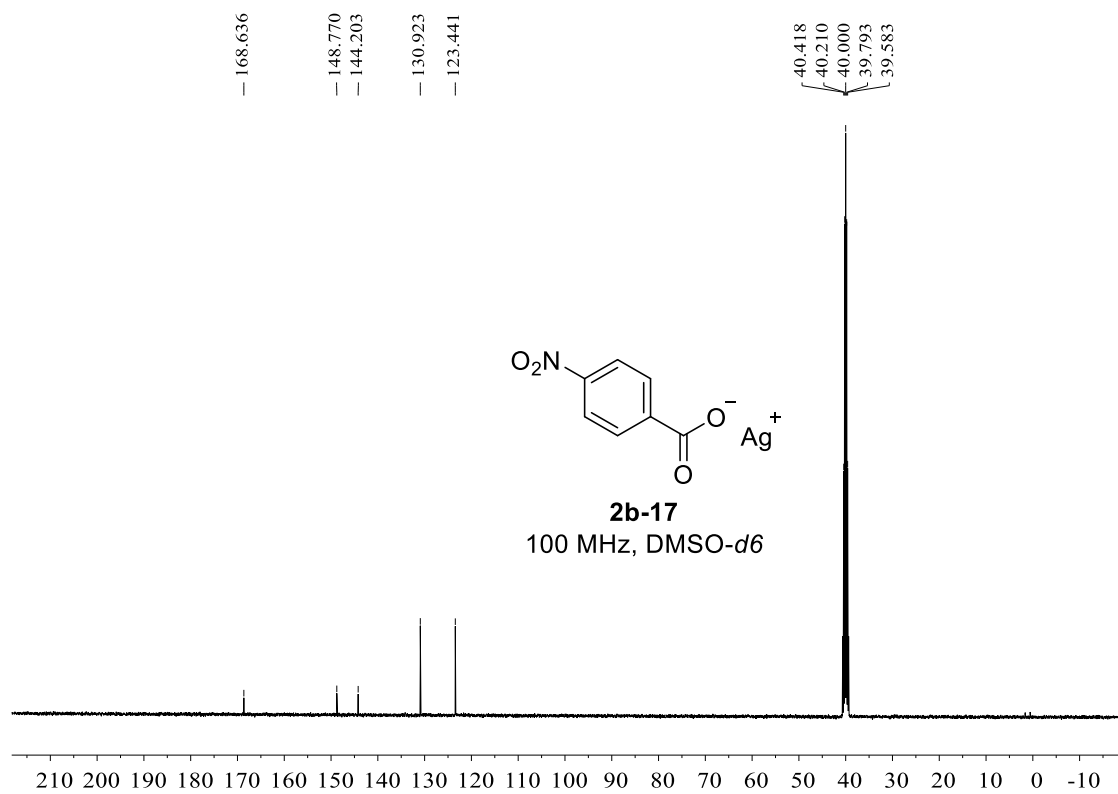

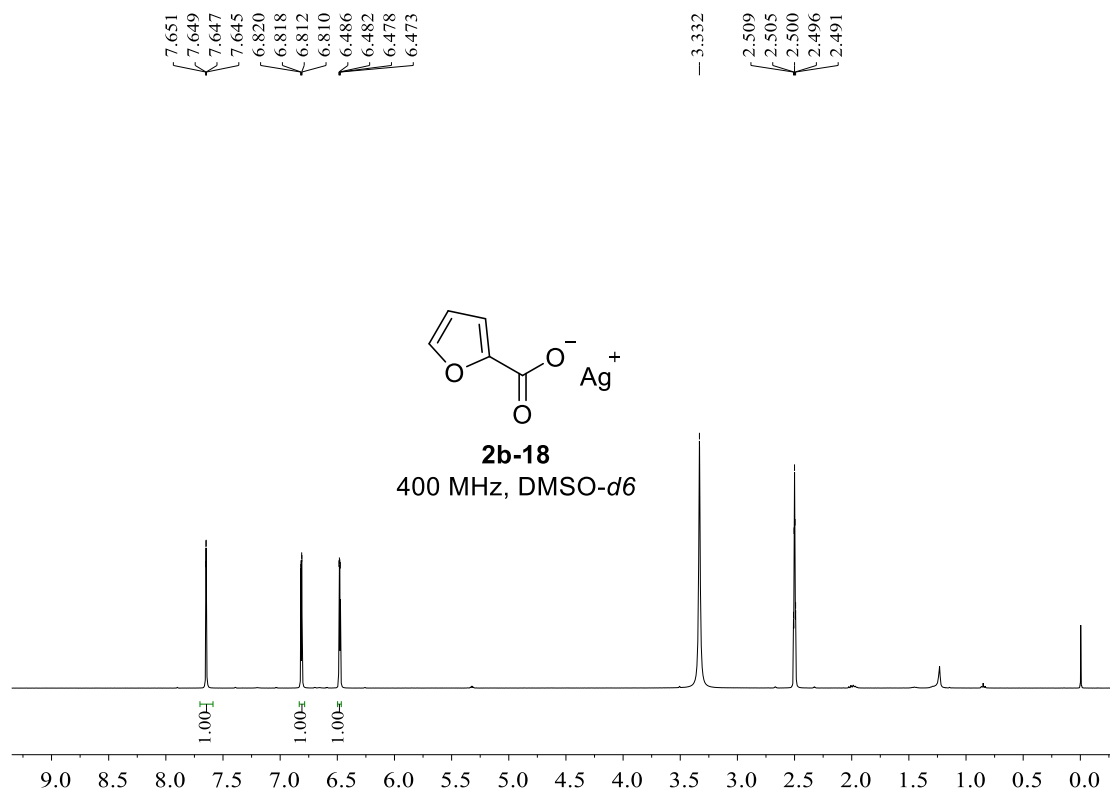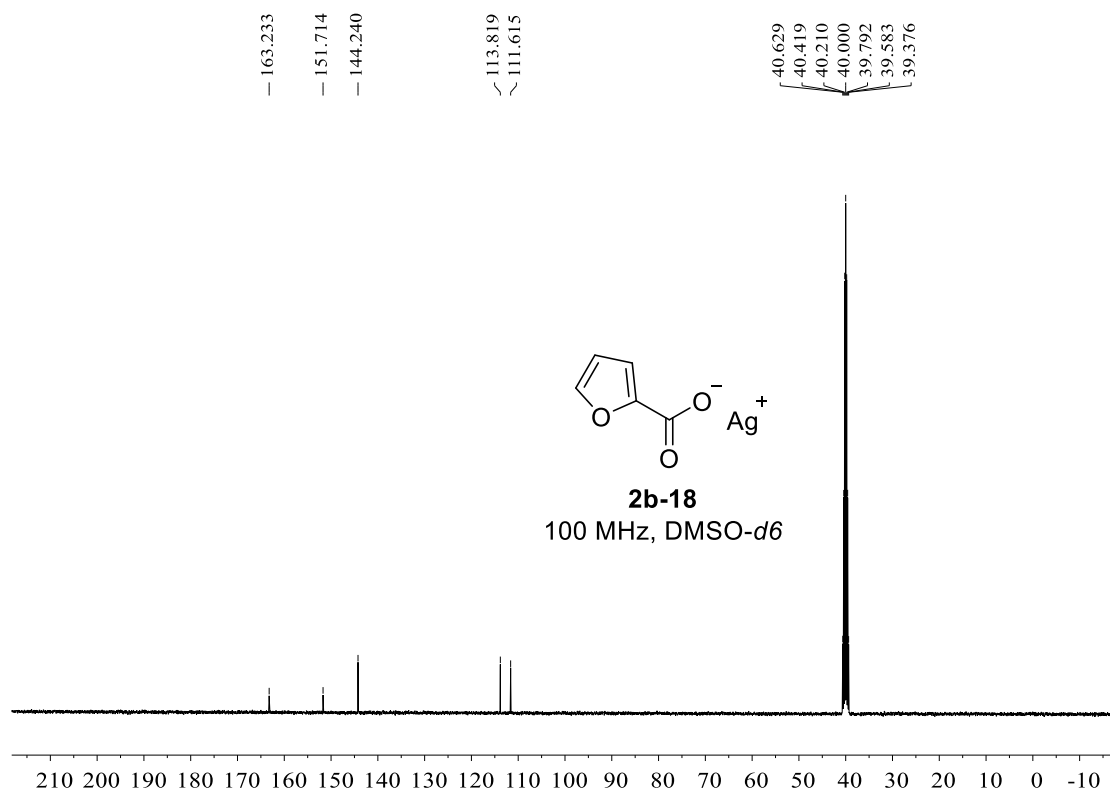

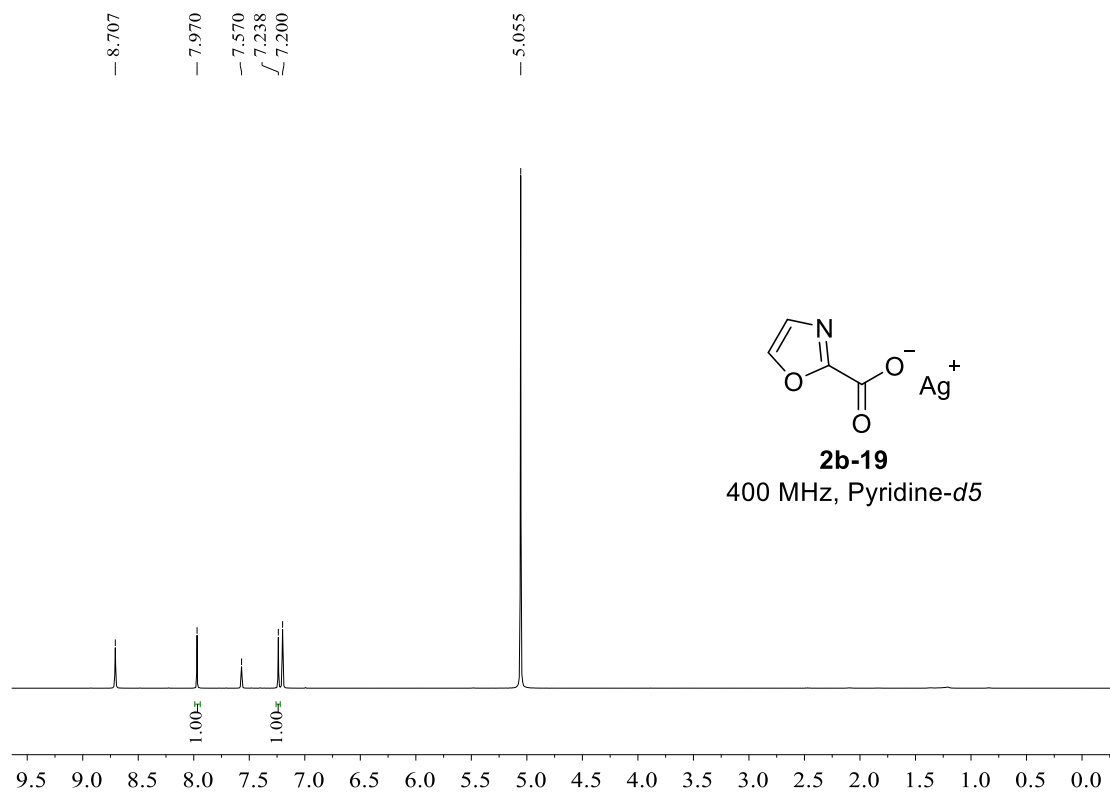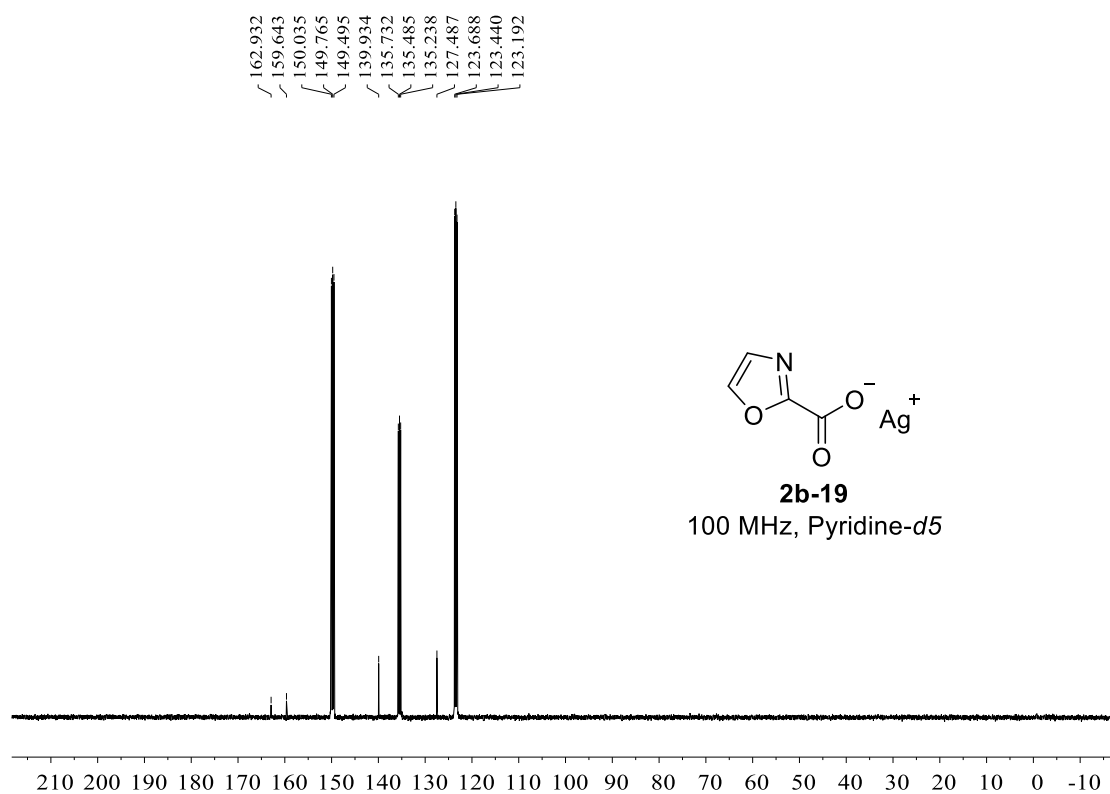

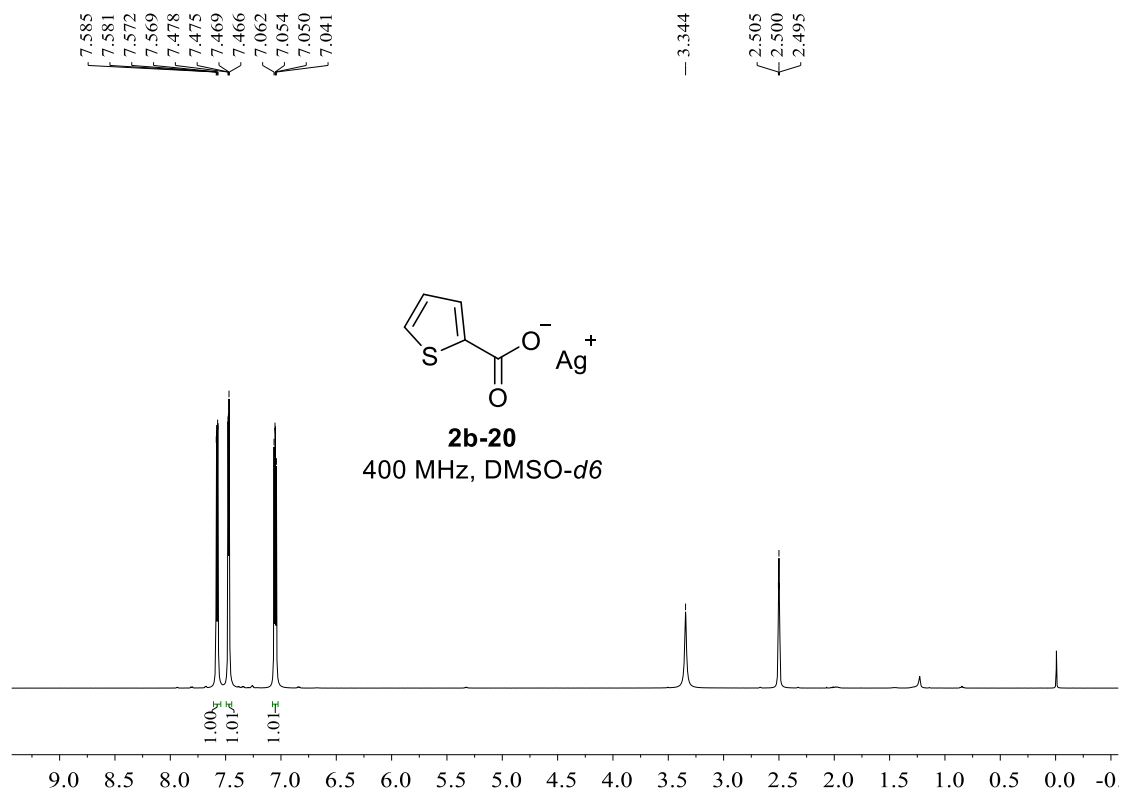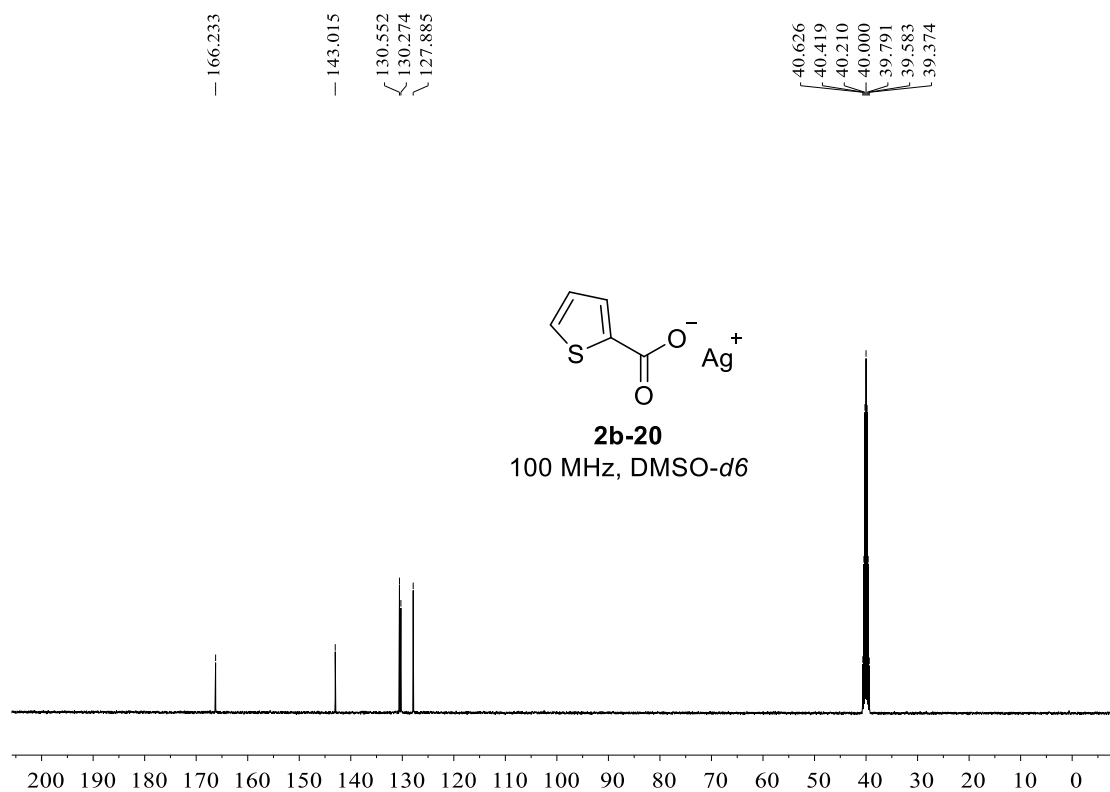

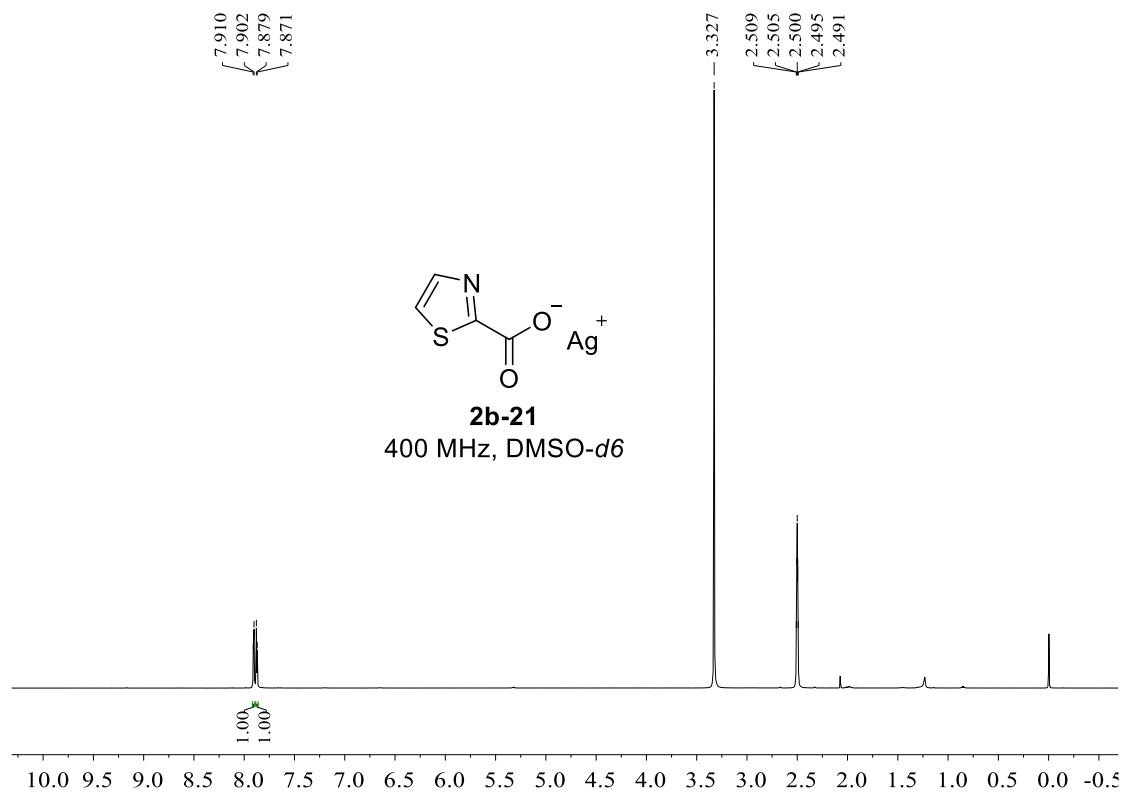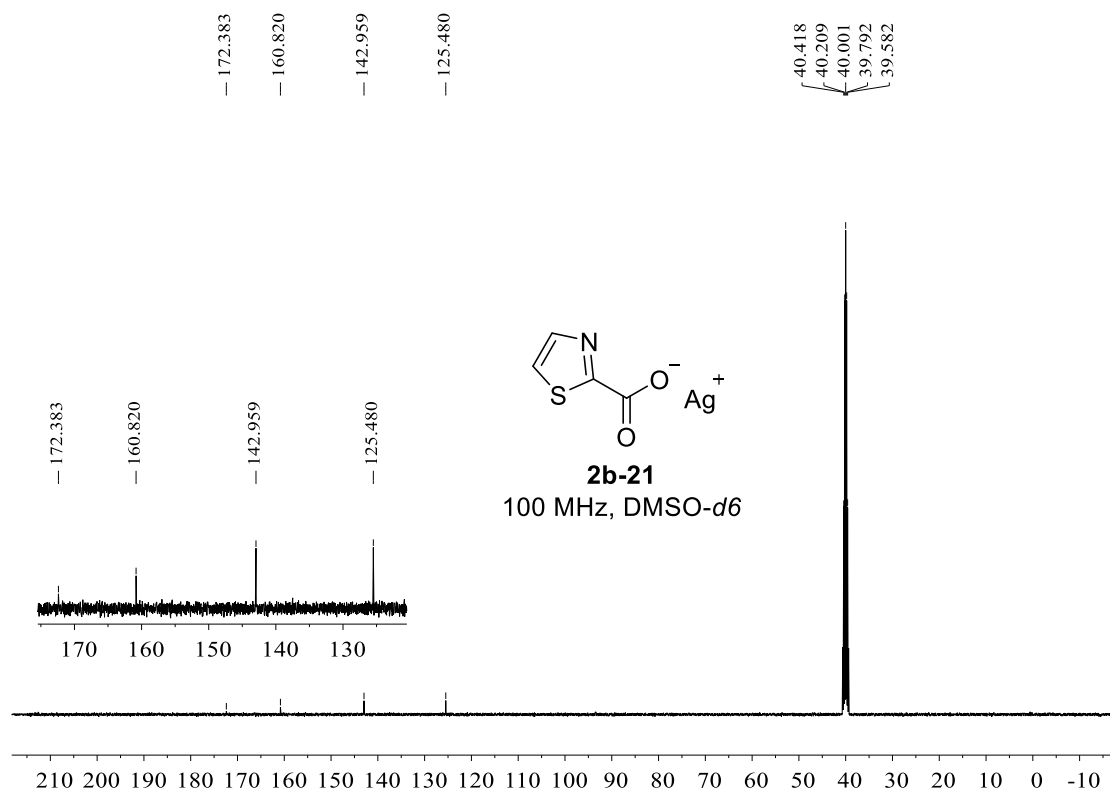

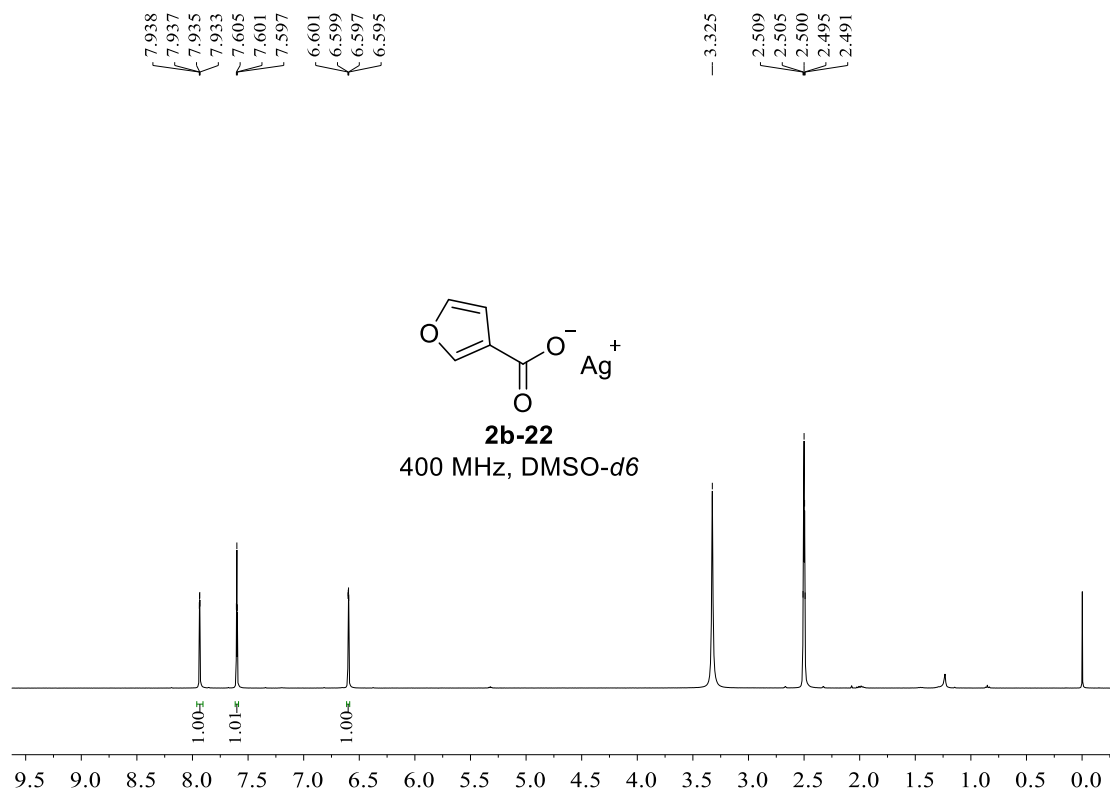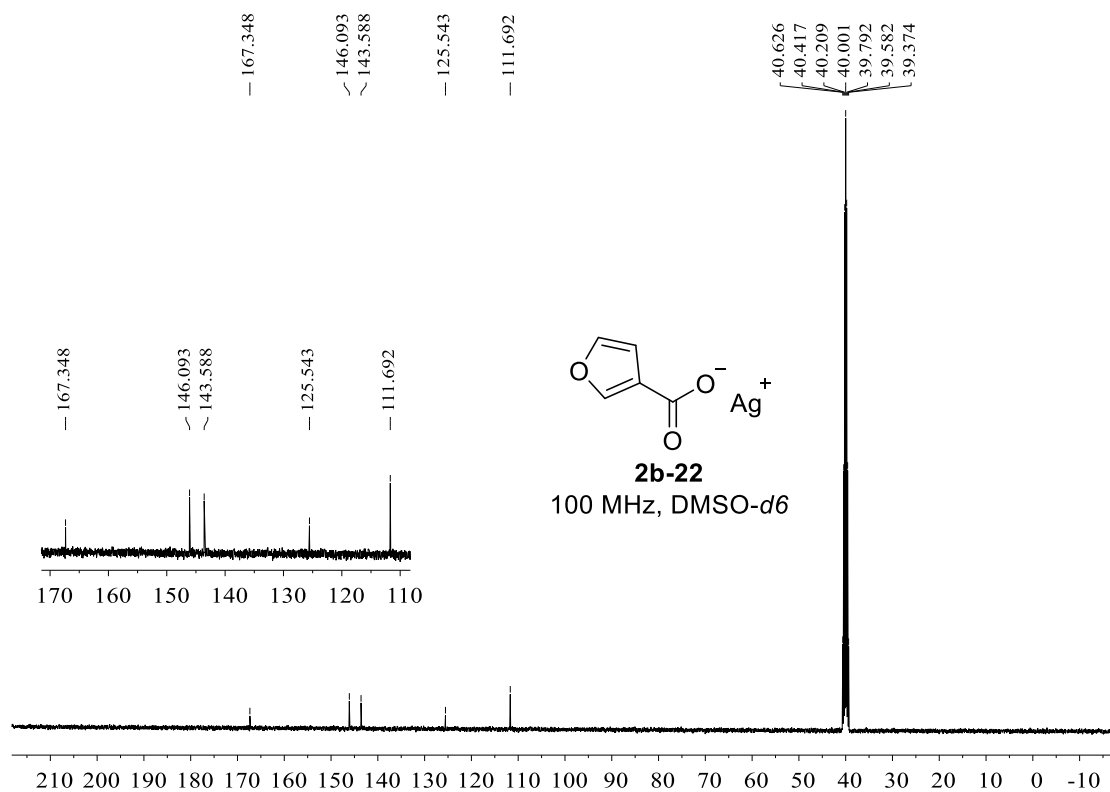



8.525  
8.523  
8.449  
8.447

2.509  
2.505  
2.500  
2.495  
2.491

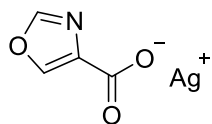

**2b-23**

400 MHz, DMSO-*d*<sub>6</sub>

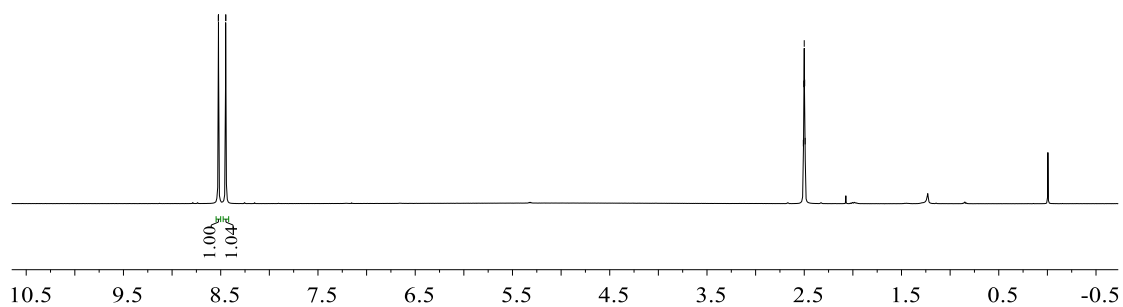

163.086  
152.675  
143.500  
136.301

40.417  
40.210  
40.001  
39.791  
39.583

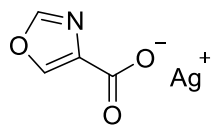

**2b-23**

100 MHz, DMSO-*d*<sub>6</sub>

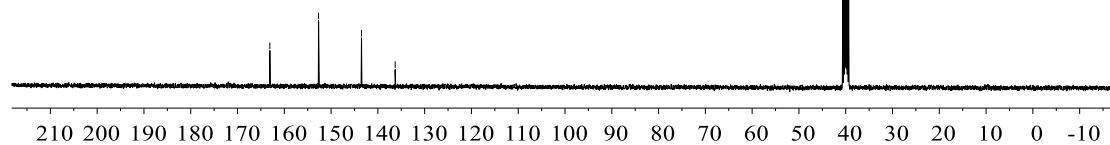

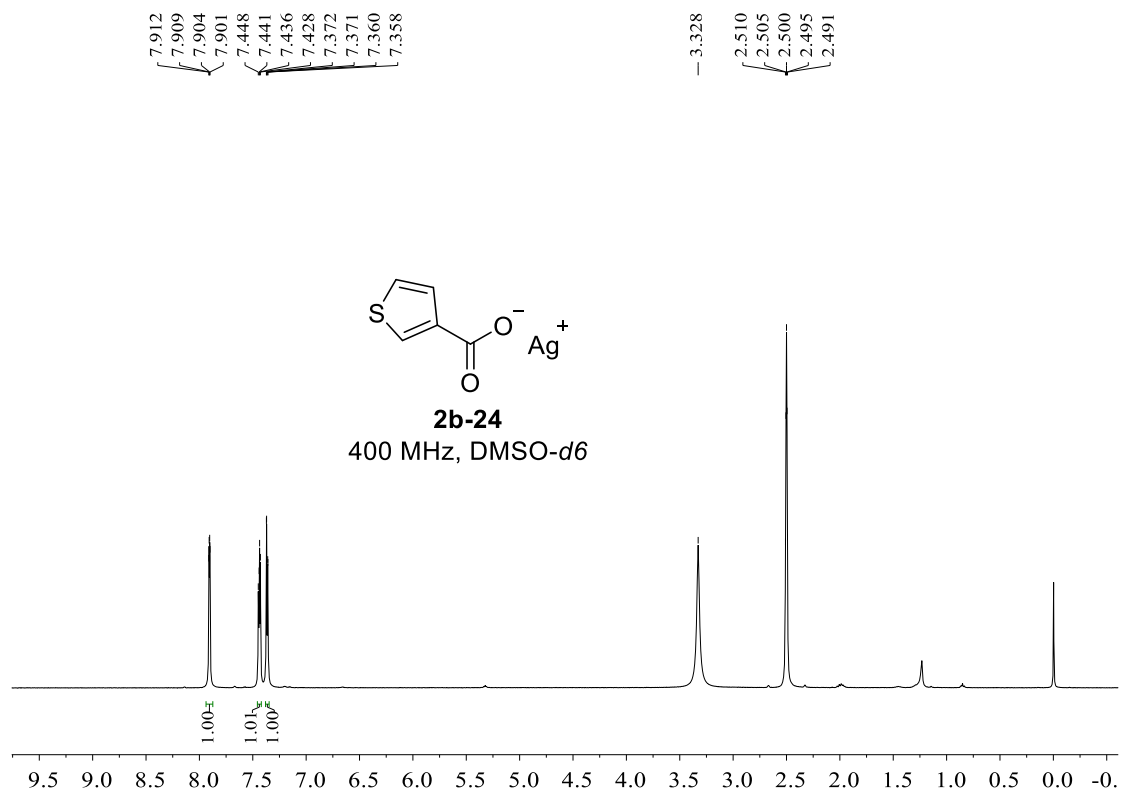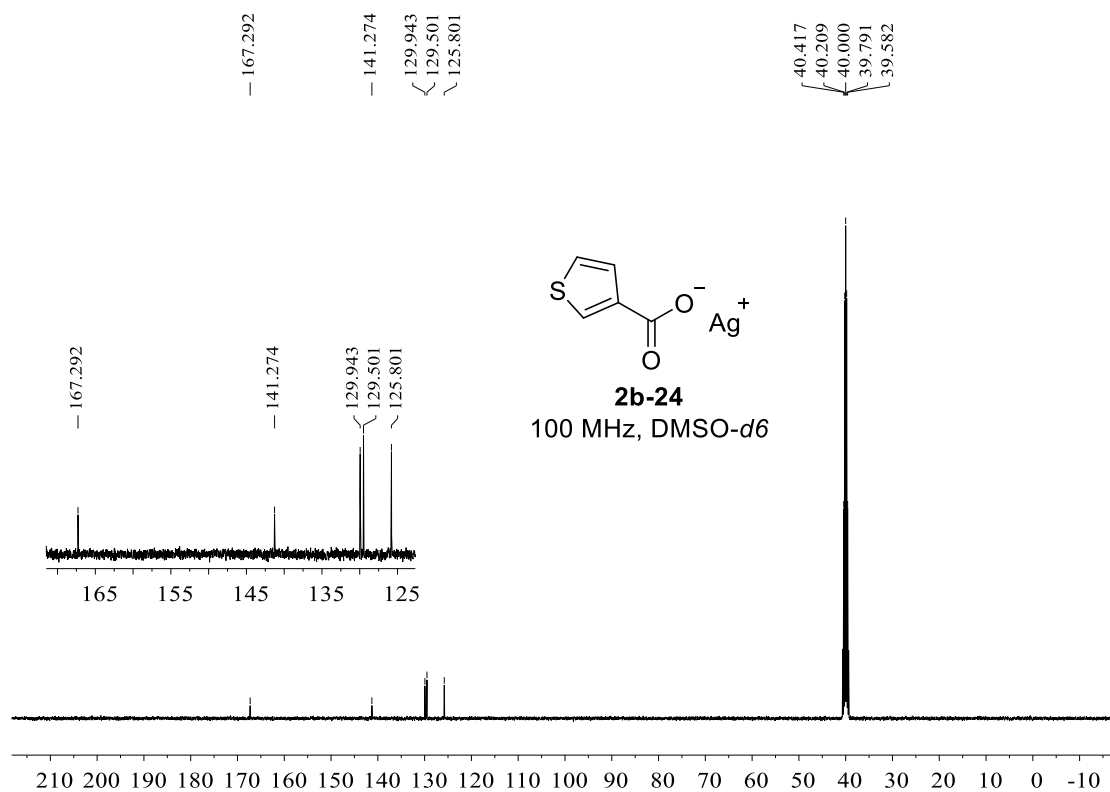

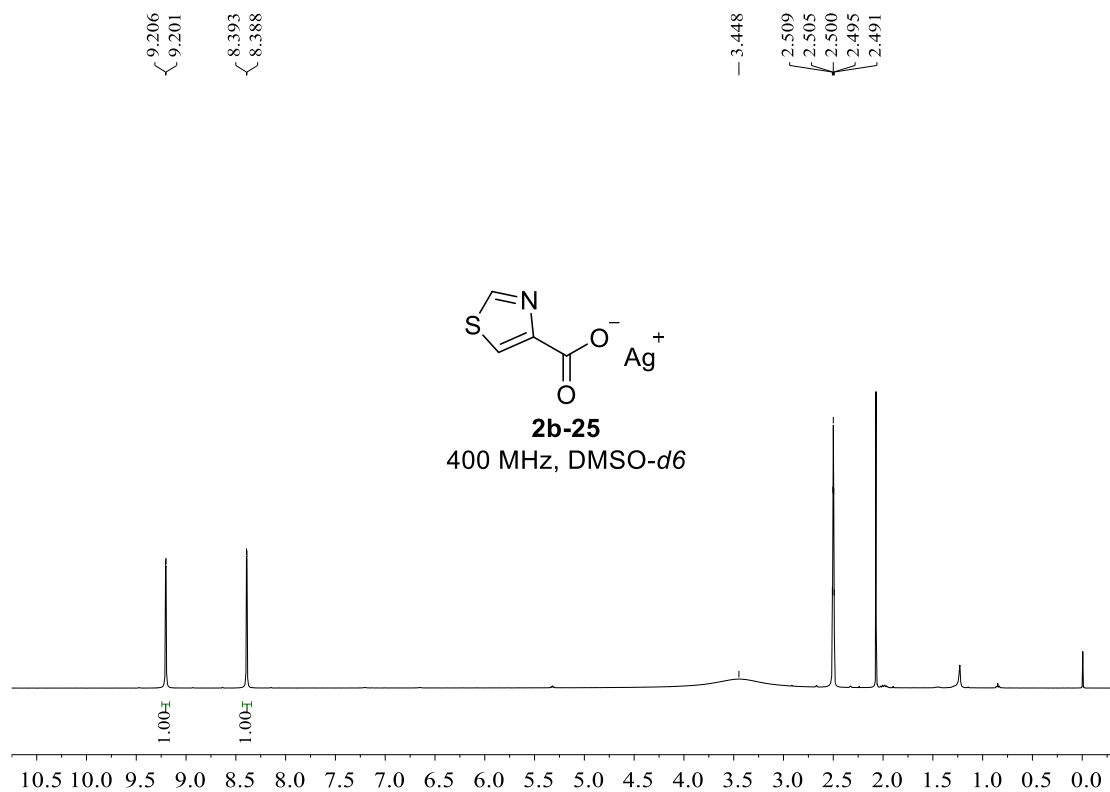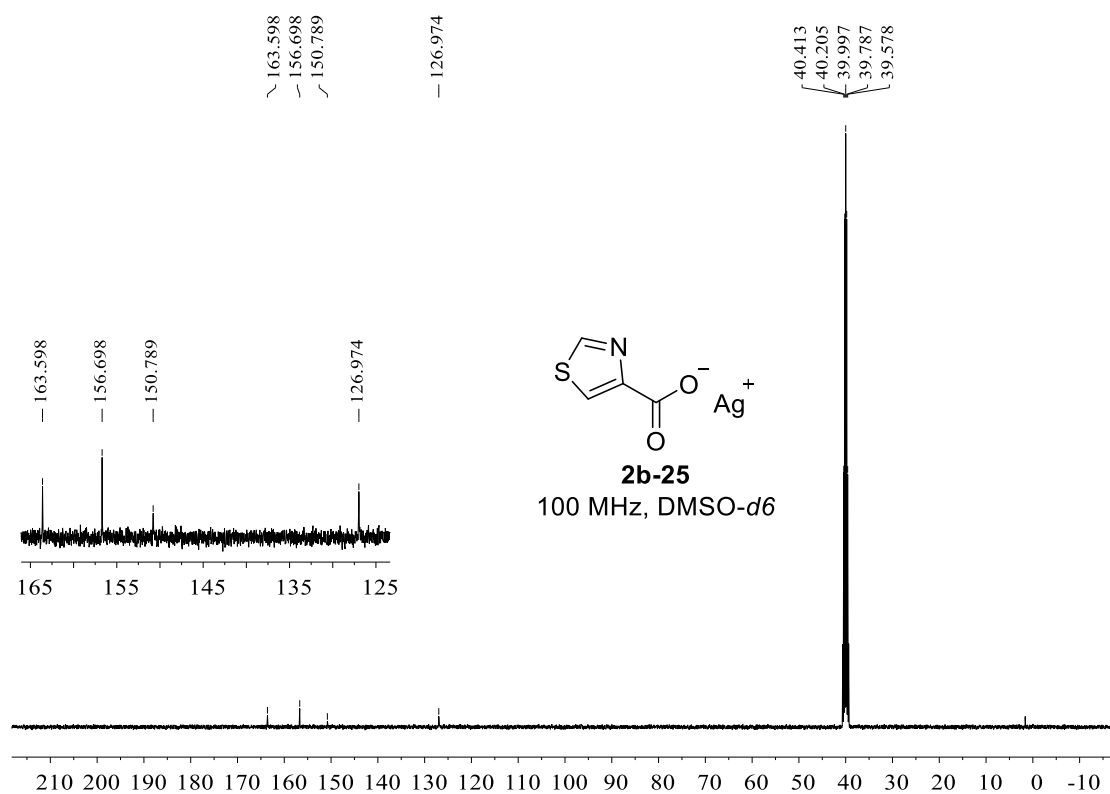

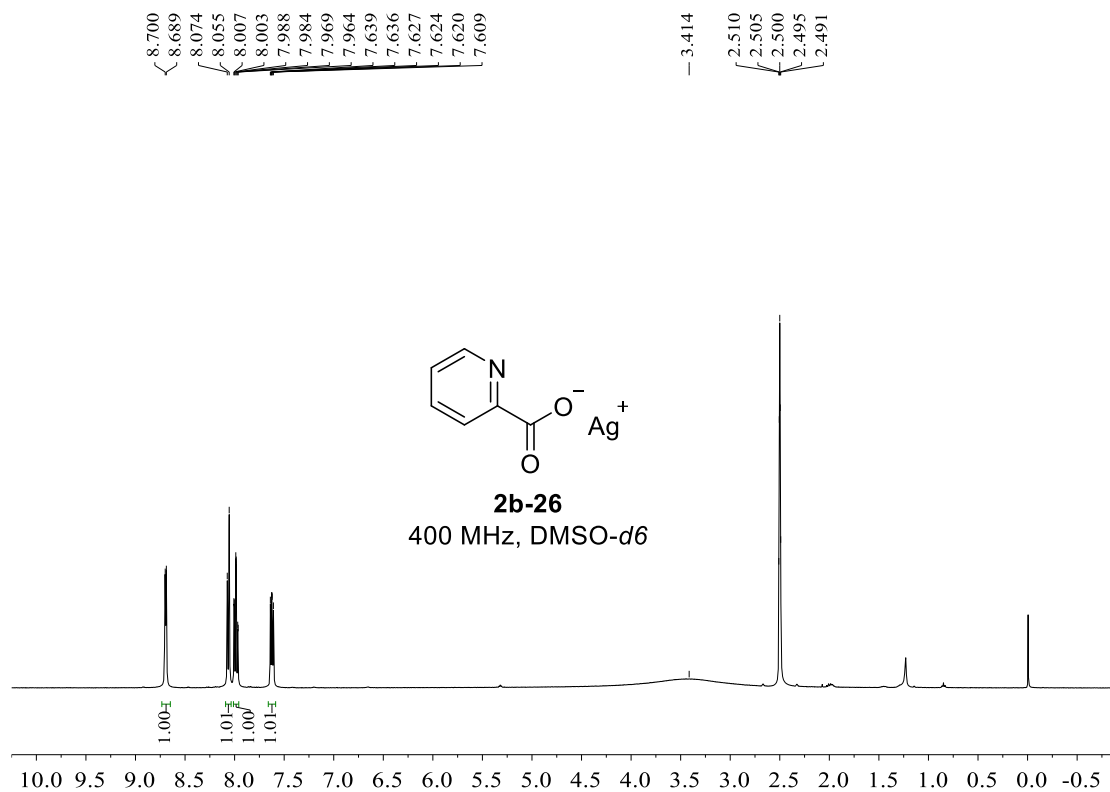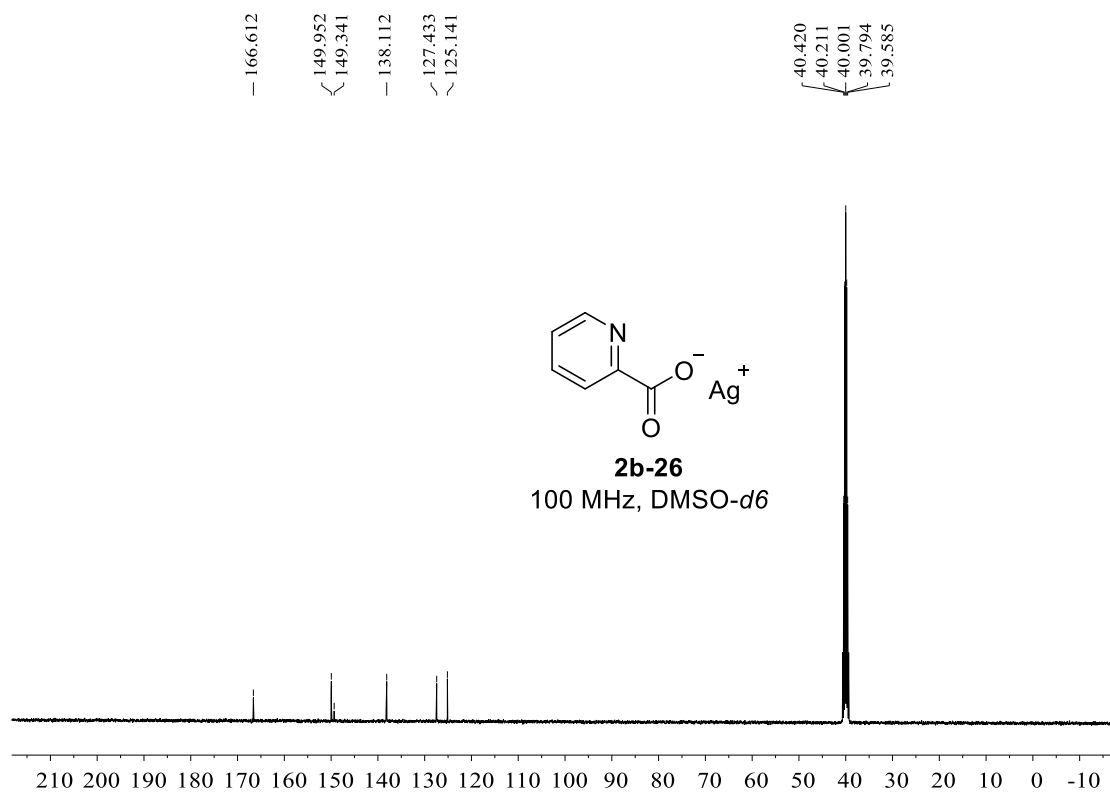

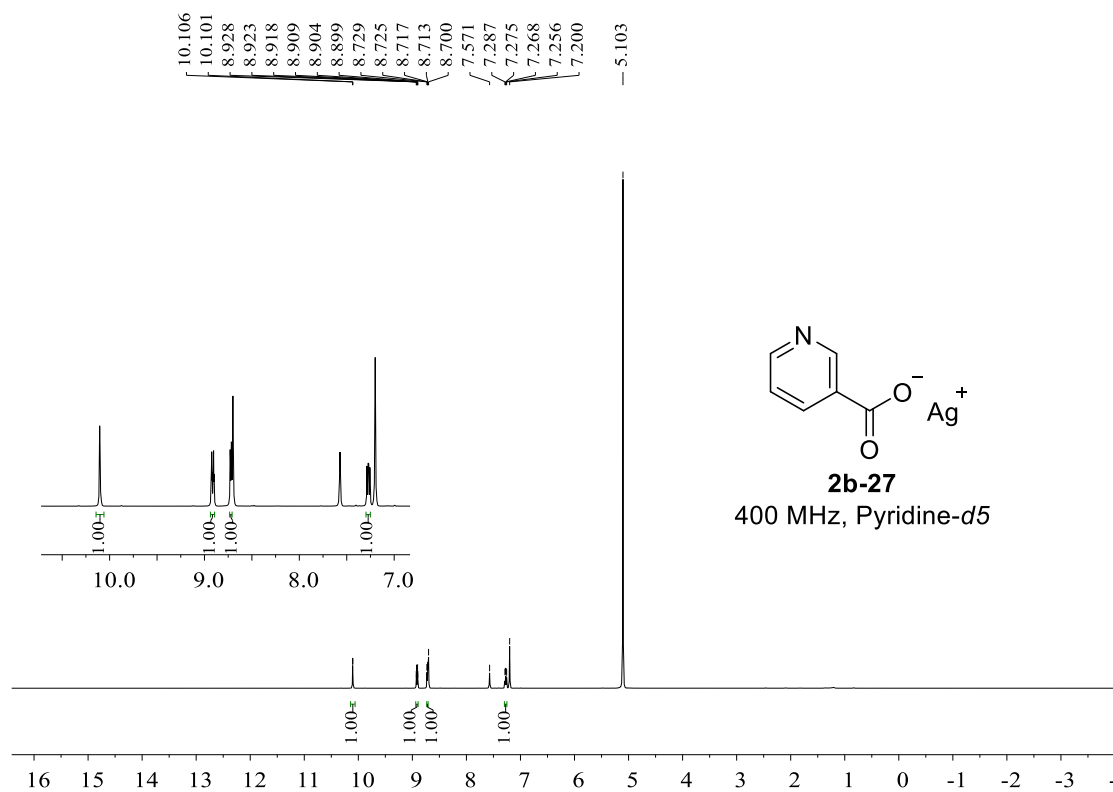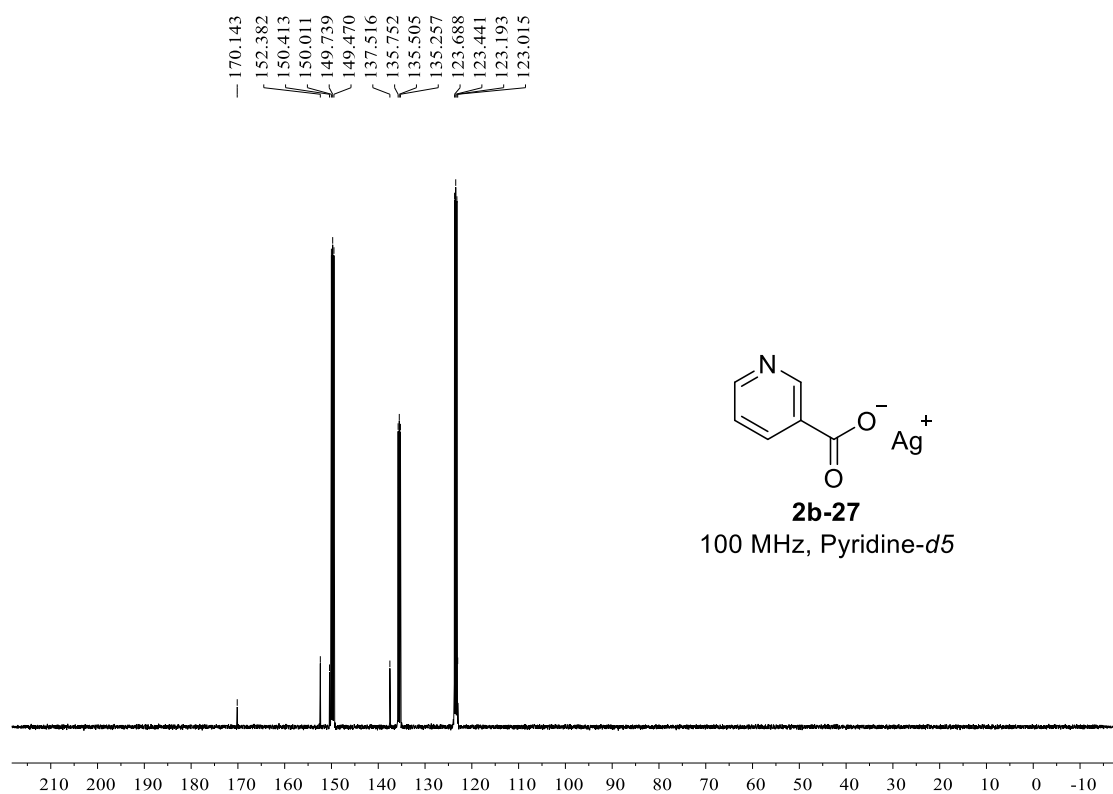

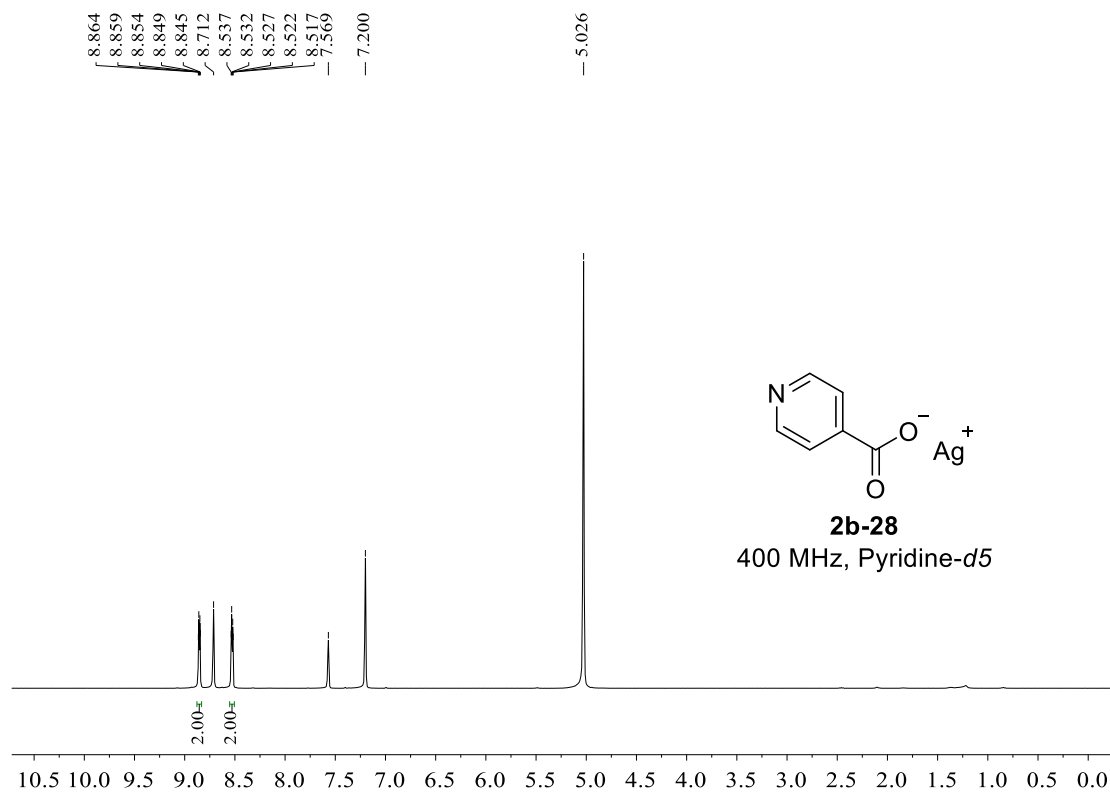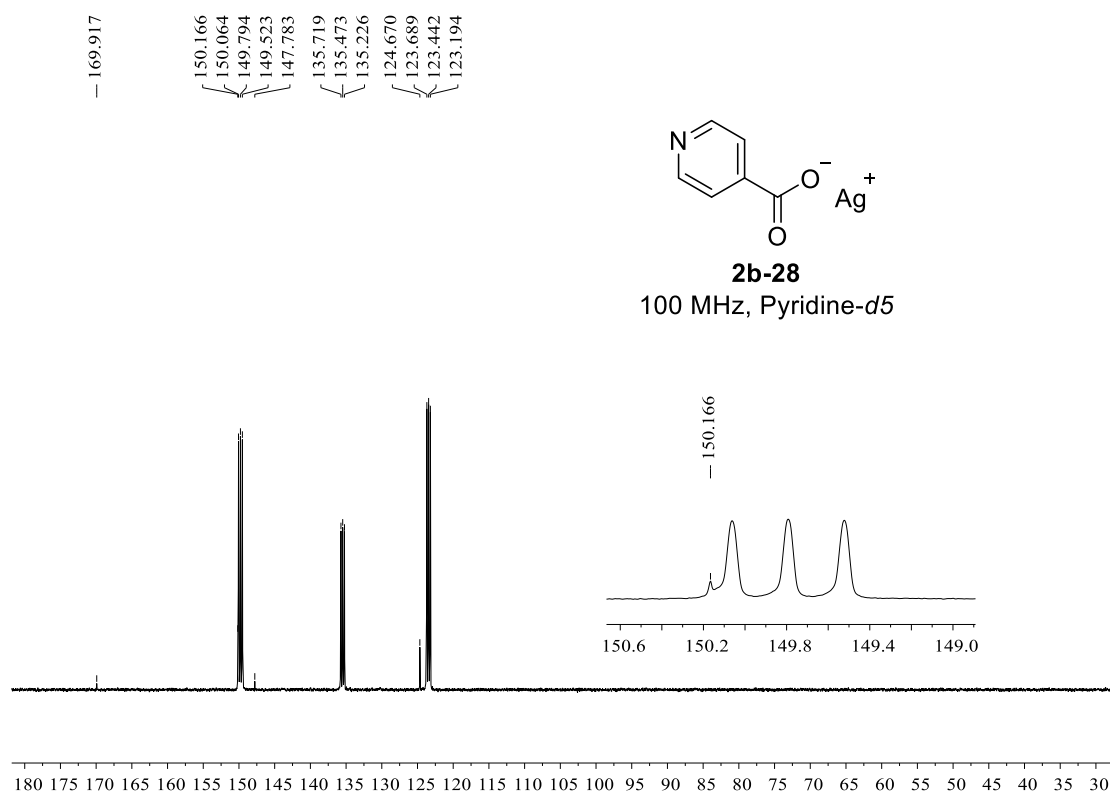

8.551  
 8.091  
 8.087  
 8.070  
 8.066  
 8.043  
 8.025  
 8.021  
 7.949  
 7.946  
 7.927  
 7.915  
 7.893  
 7.587  
 7.583  
 7.570  
 7.566  
 7.555  
 7.551  
 7.546  
 7.536  
 7.532  
 7.519  
 7.515  
 3.351  
 2.509  
 2.505  
 2.500  
 2.495  
 2.491

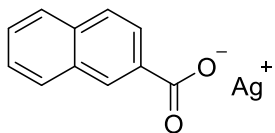

**2b-29**

400 MHz, DMSO-*d*<sub>6</sub>

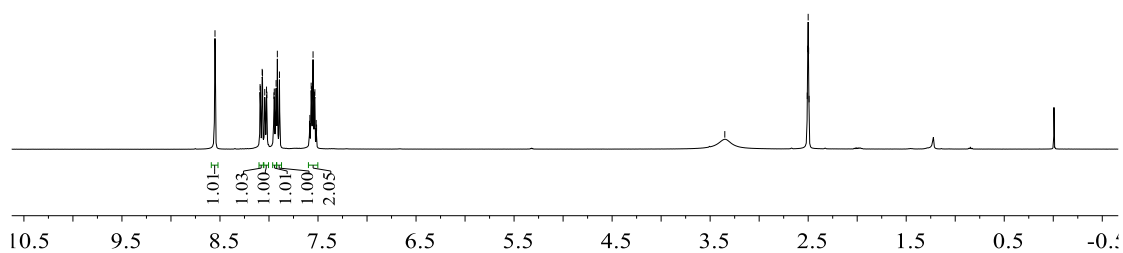

170.451  
 134.462  
 134.269  
 132.897  
 130.037  
 129.362  
 127.939  
 127.635  
 127.477  
 127.285  
 126.602  
 40.417  
 40.209  
 40.000  
 39.791  
 39.582

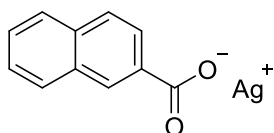

**2b-29**

100 MHz, DMSO-*d*<sub>6</sub>

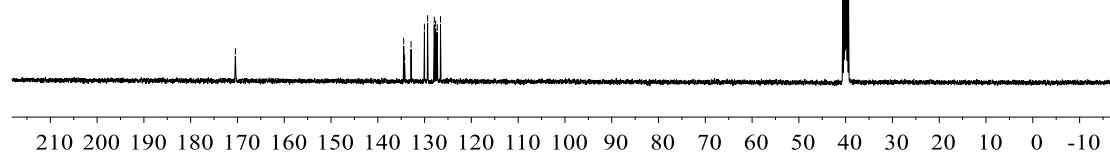

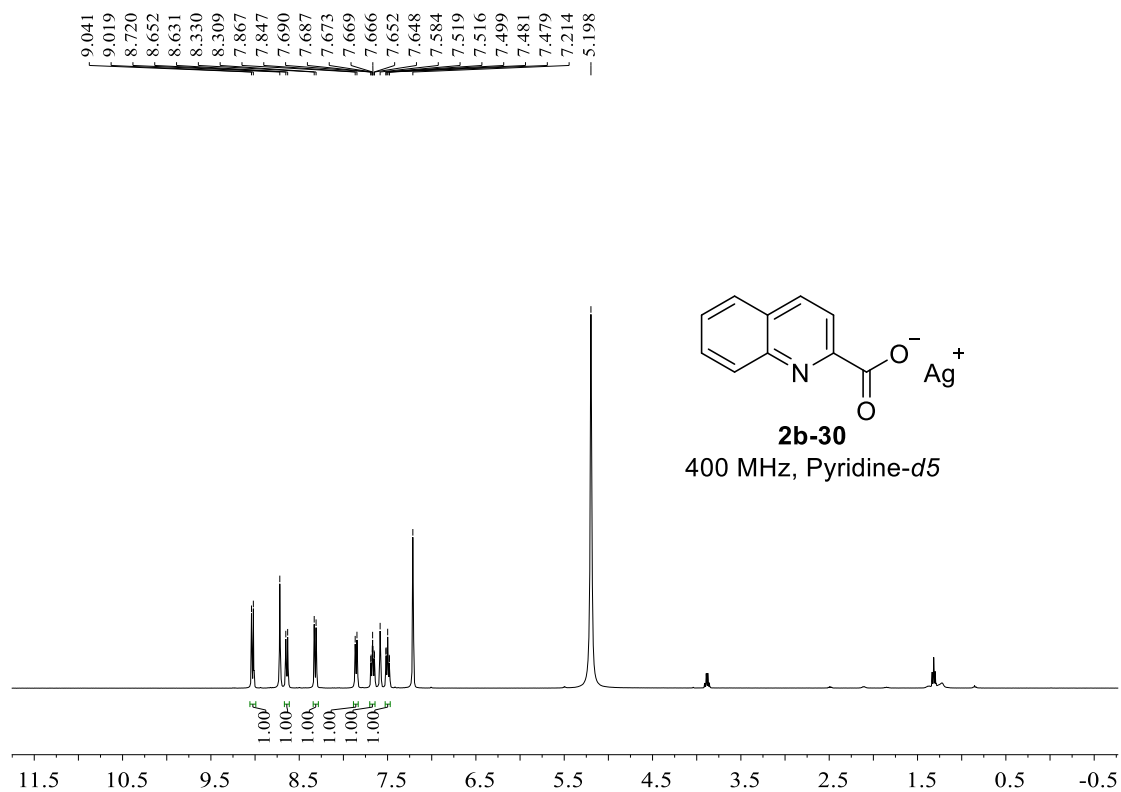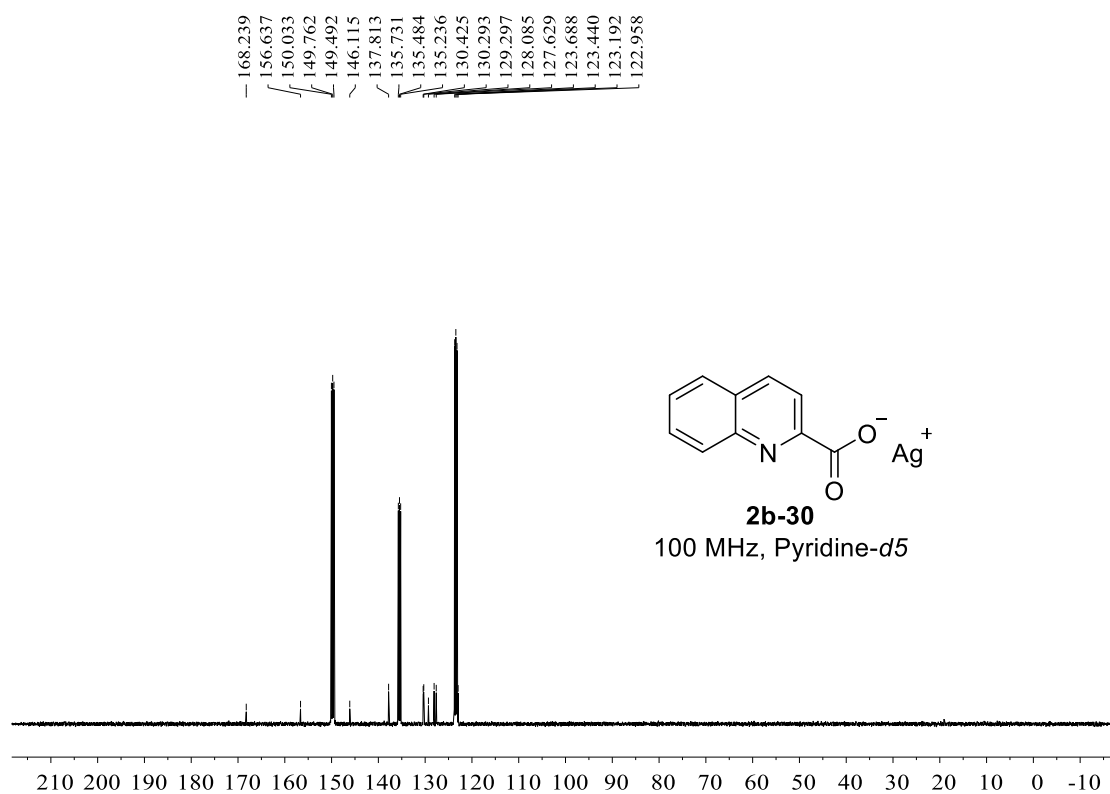



8.942  
8.935  
8.918  
7.953  
7.949  
7.935  
7.931  
7.925  
7.911  
7.904  
7.891  
7.875  
7.859  
7.843  
7.827  
7.811  
7.795  
7.779  
7.763  
7.747  
7.731  
7.715  
7.699  
7.683  
7.667  
7.651  
7.635  
7.619  
7.603  
7.587  
7.571  
7.555  
7.539  
7.523  
7.507  
7.491  
7.475

3.338

2.509  
2.500  
2.491

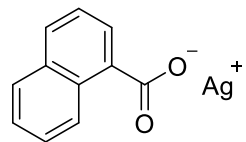

**2b-31**  
400 MHz, DMSO-*d*6

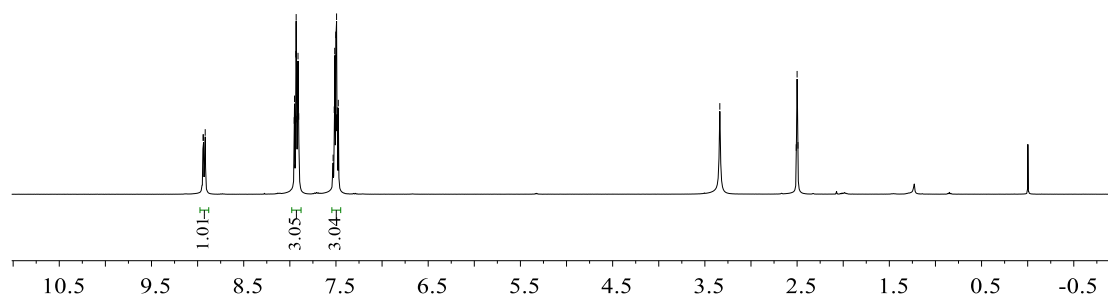

172.702

136.932  
133.870  
131.232  
129.688  
128.441  
127.768  
127.732  
126.326  
125.917  
125.457

40.626  
40.418  
40.210  
40.001  
39.792  
39.584  
39.374

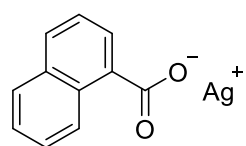

**2b-31**  
100 MHz, DMSO-*d*6

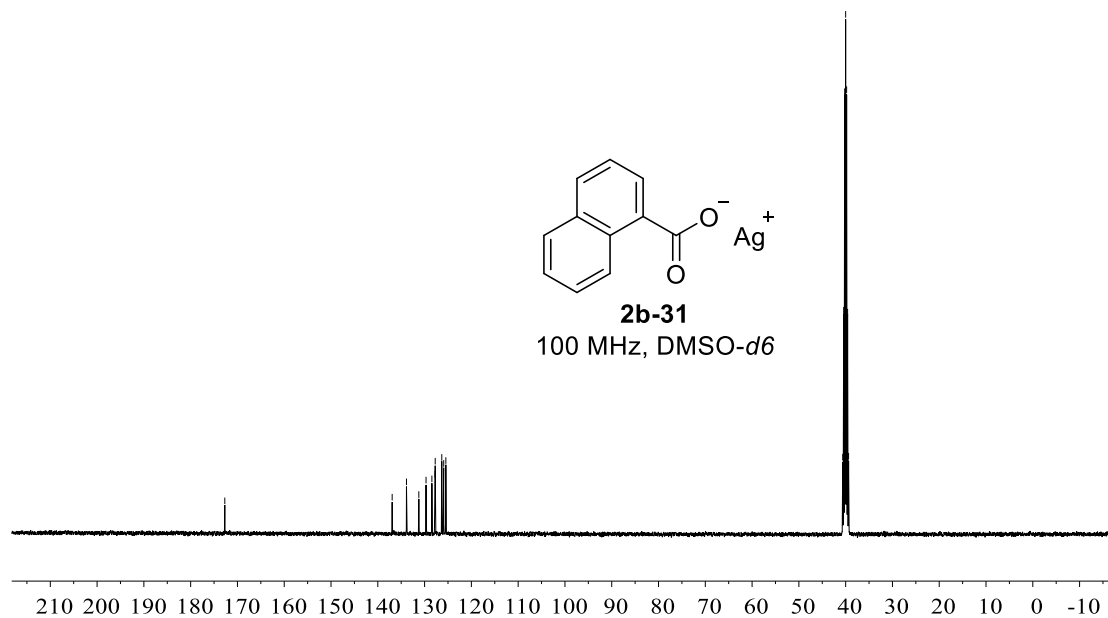

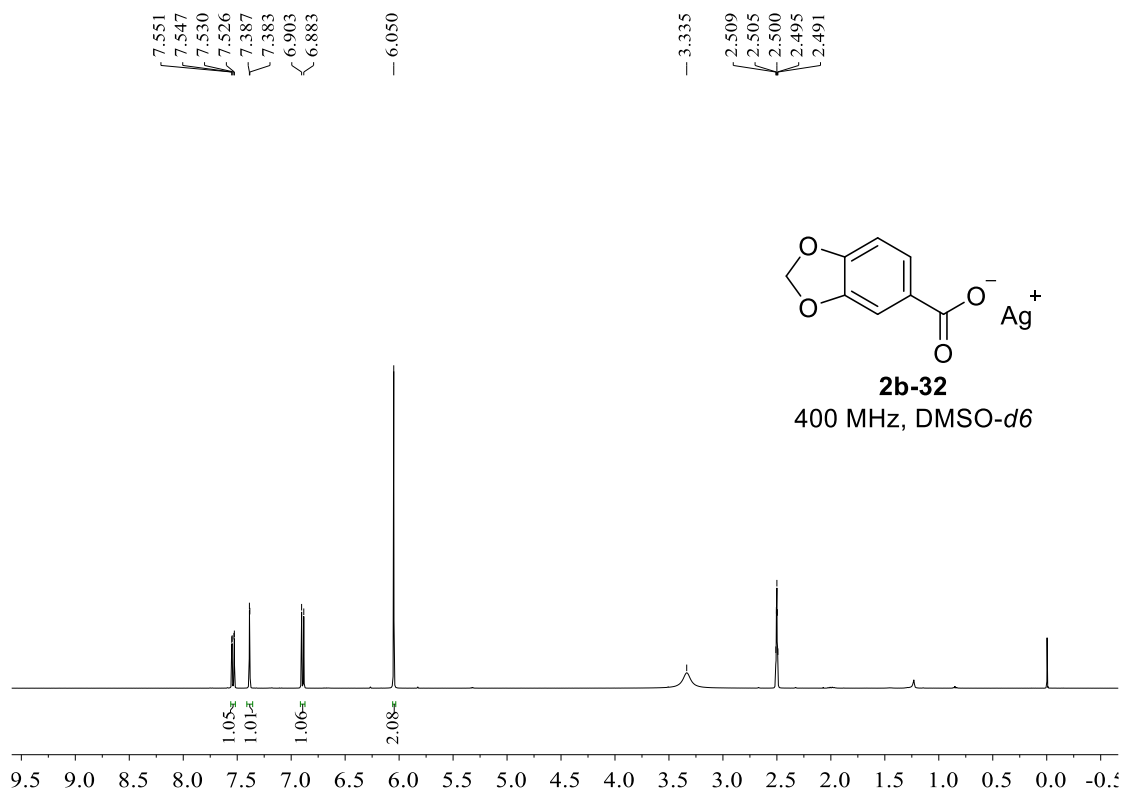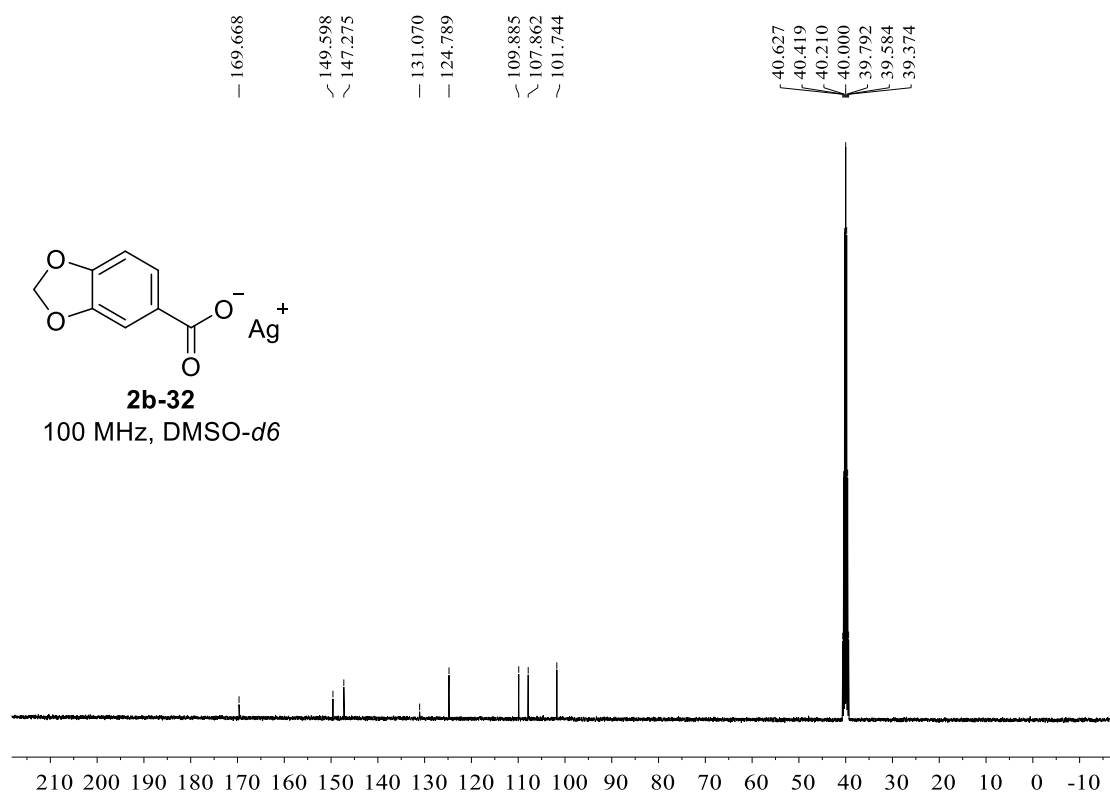

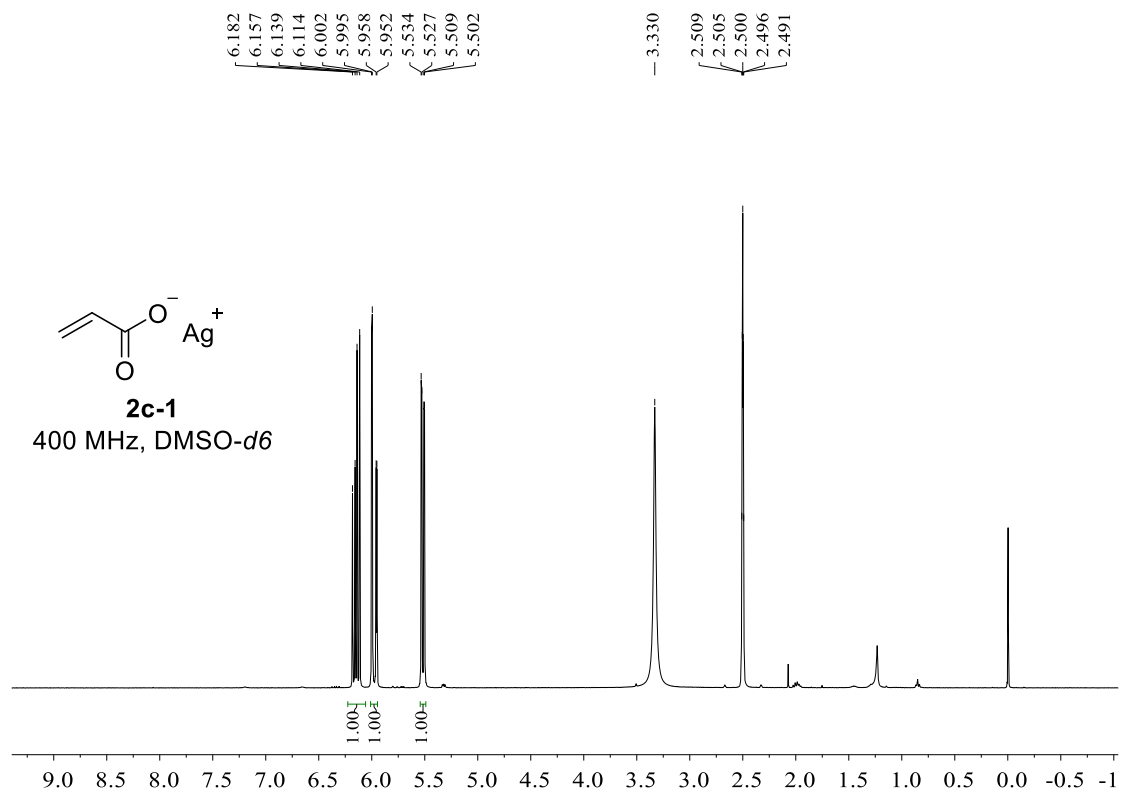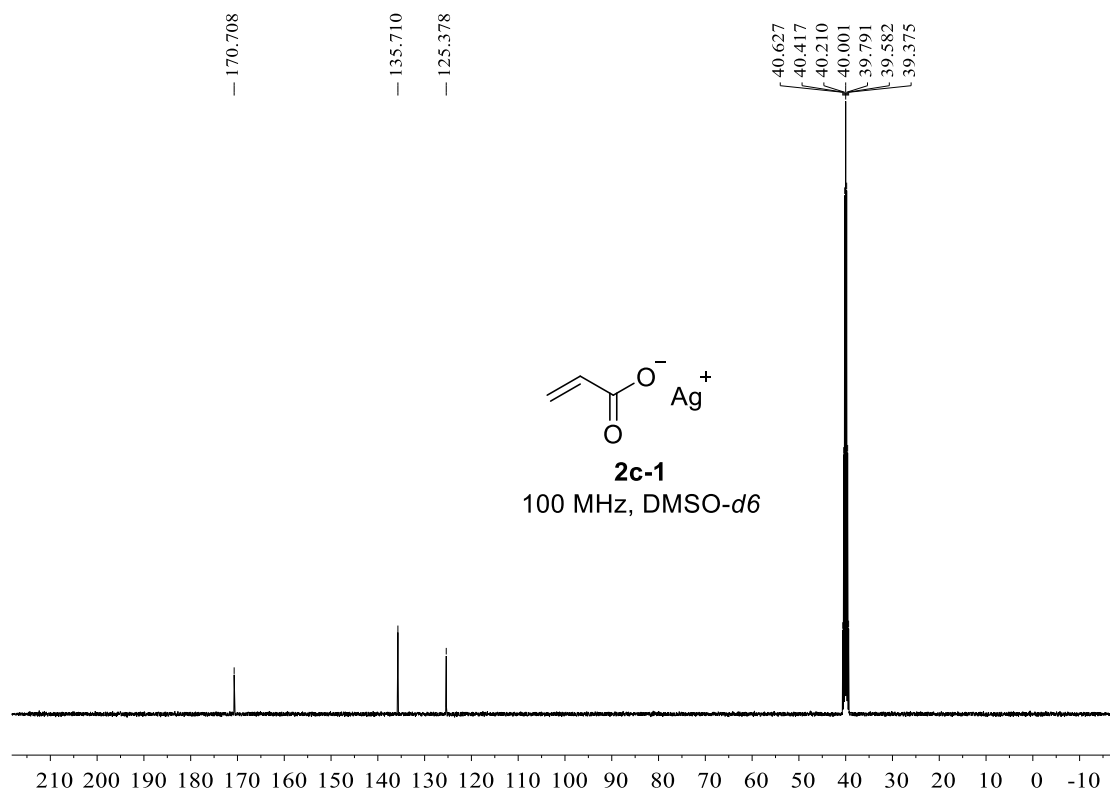

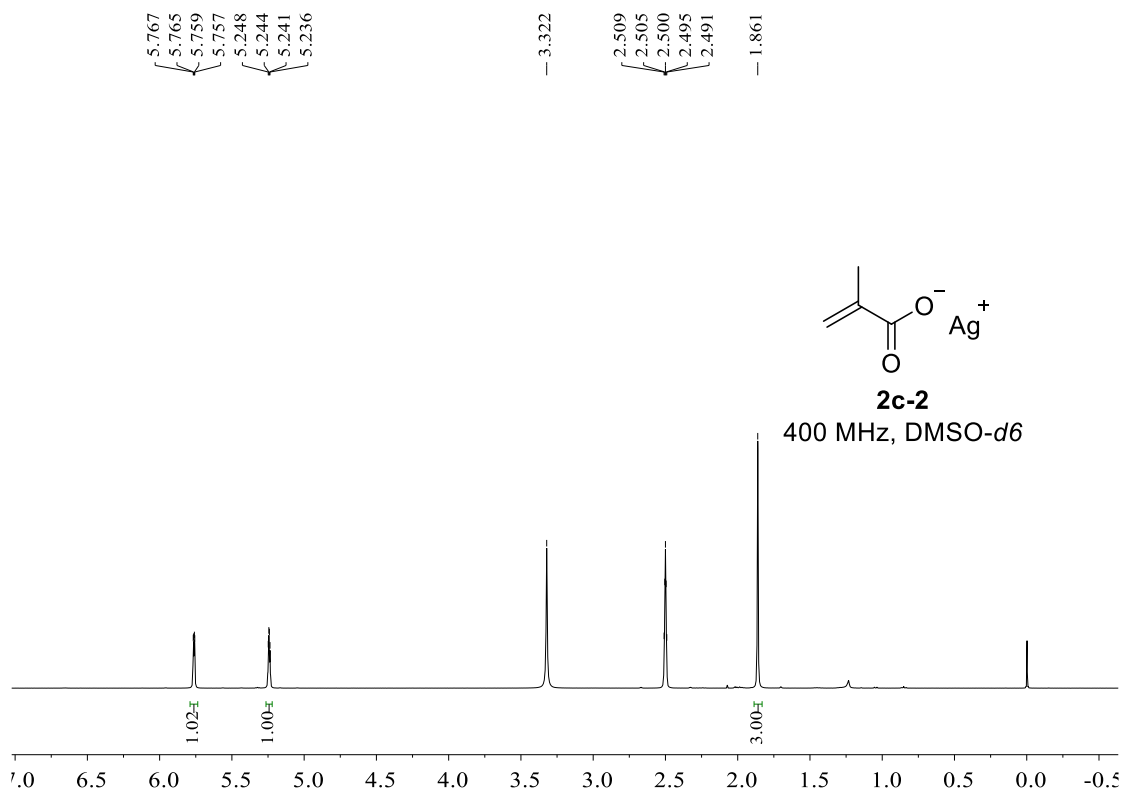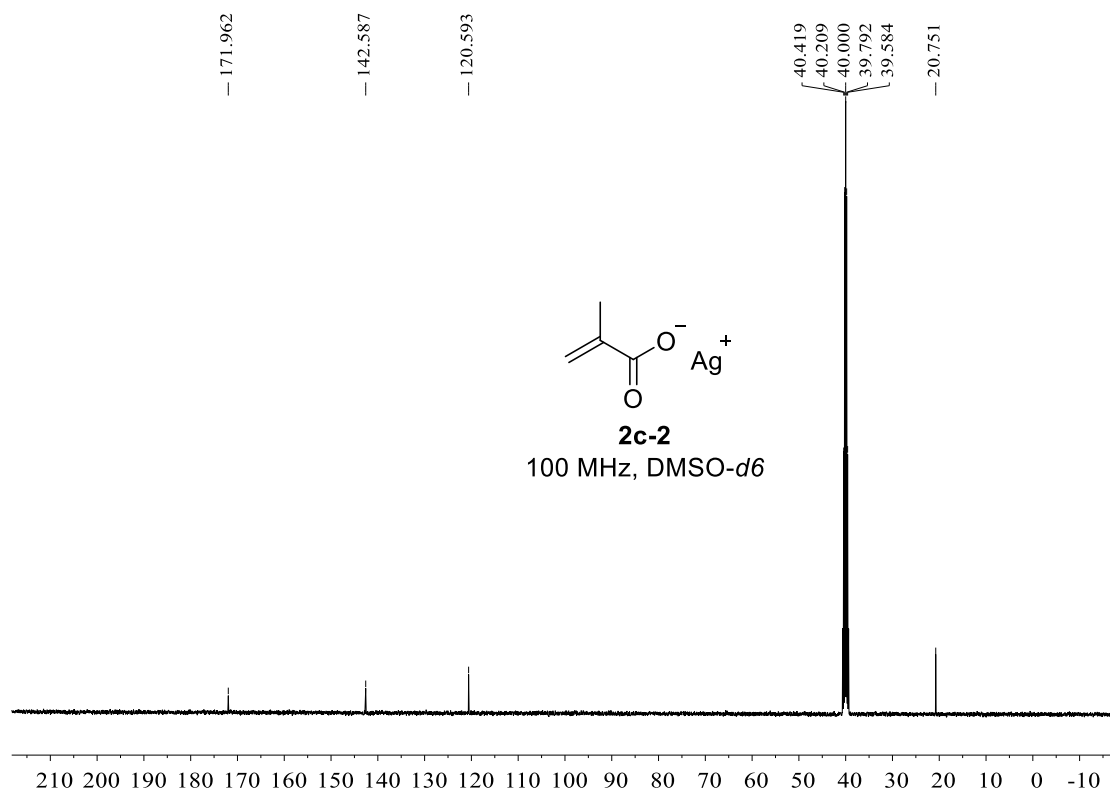

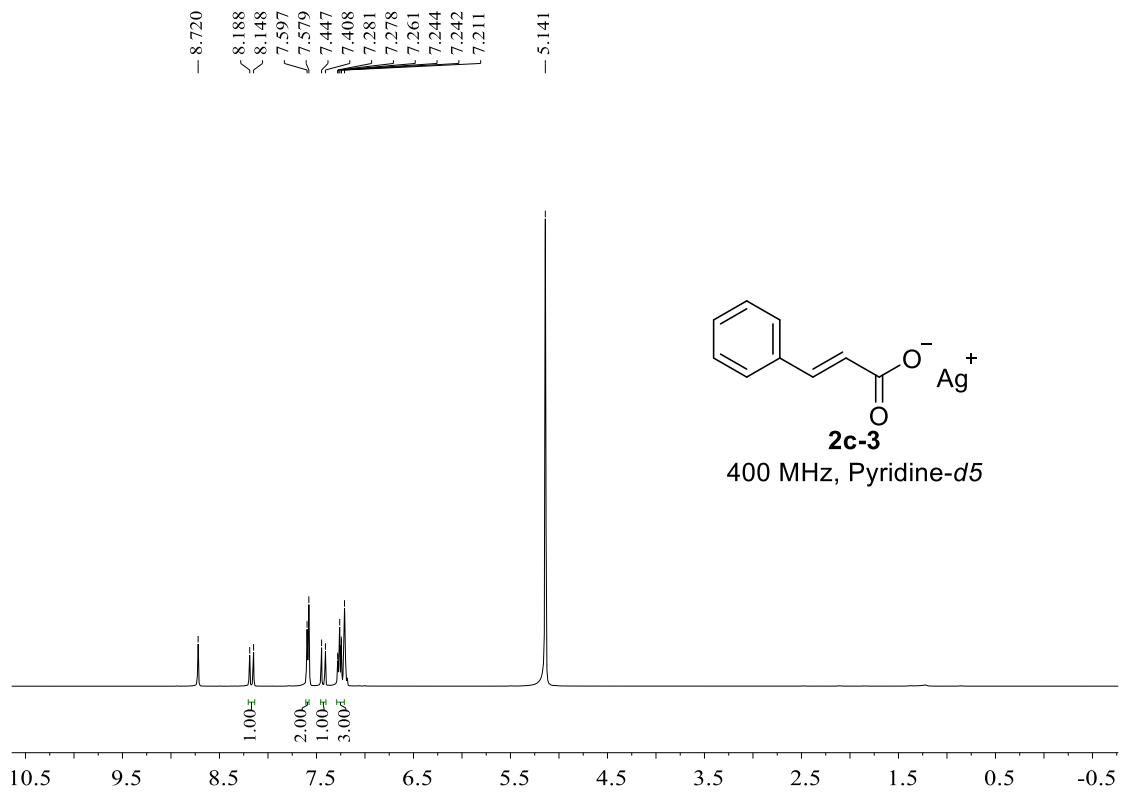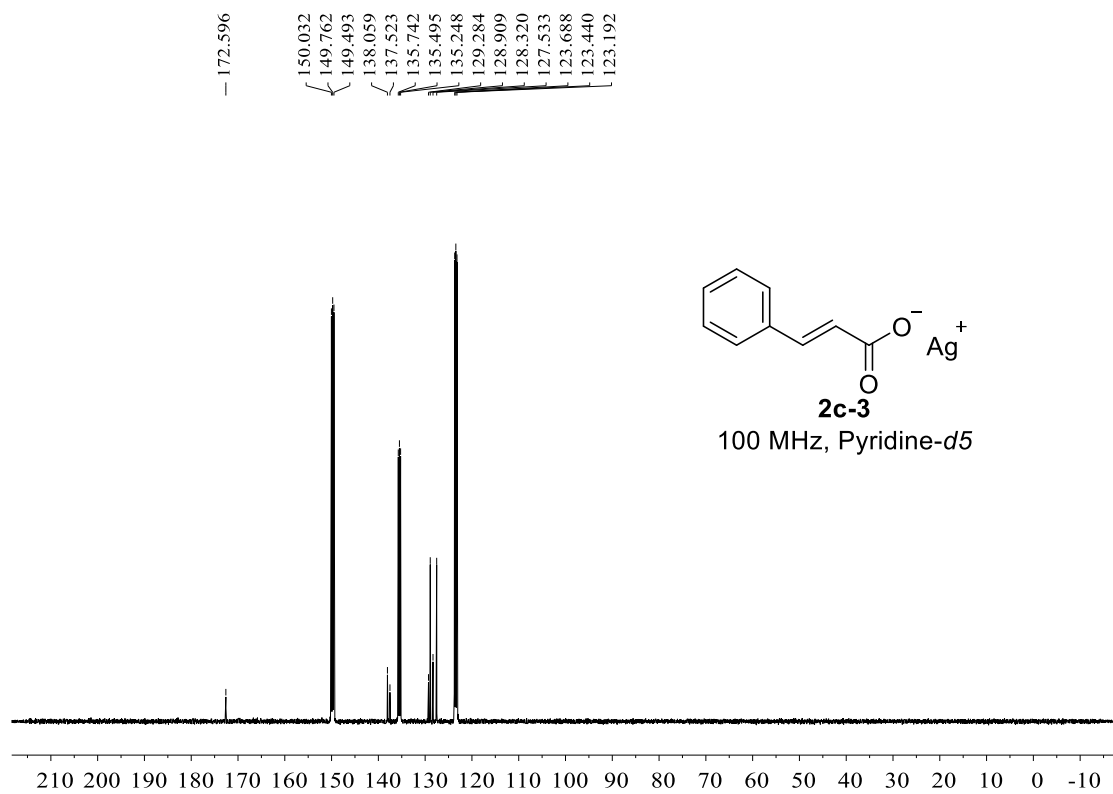

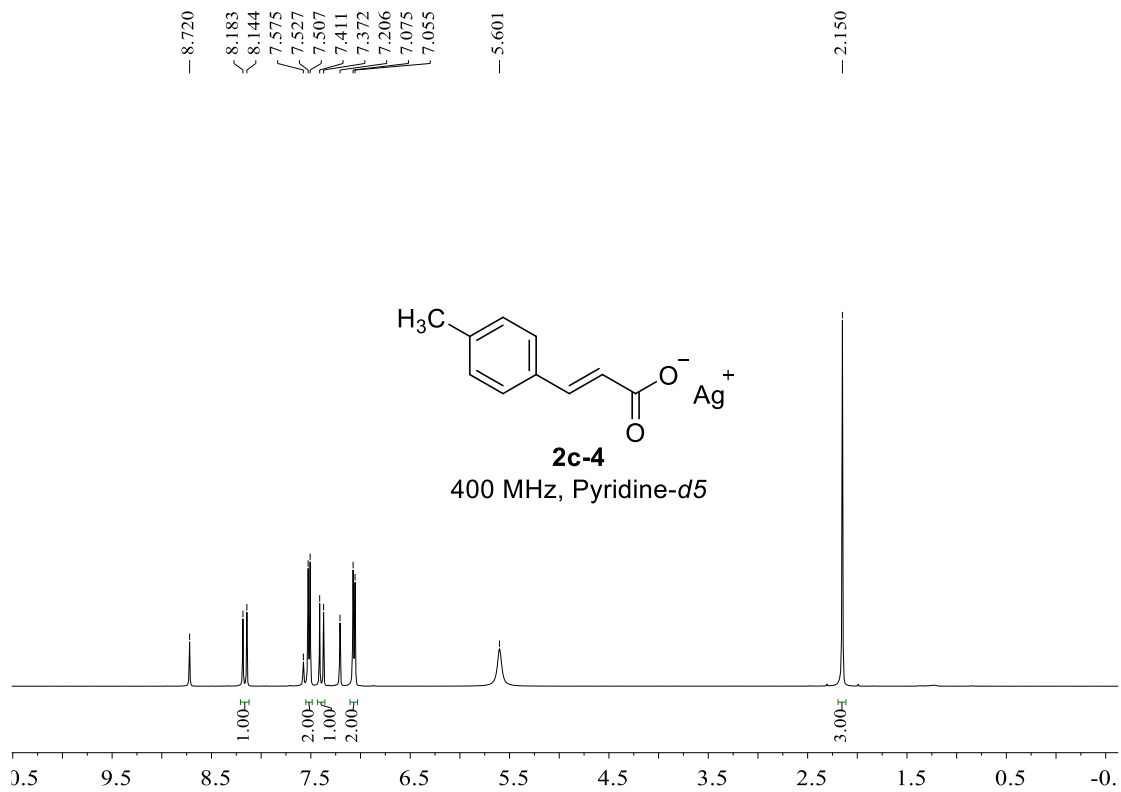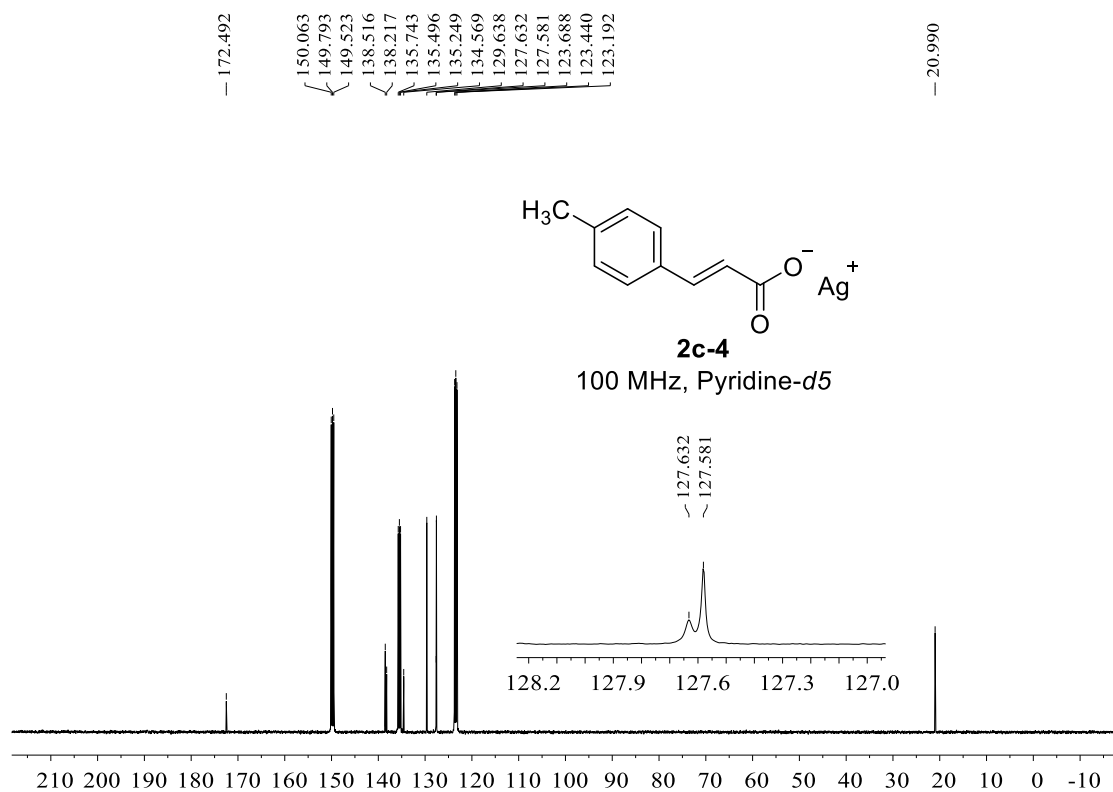

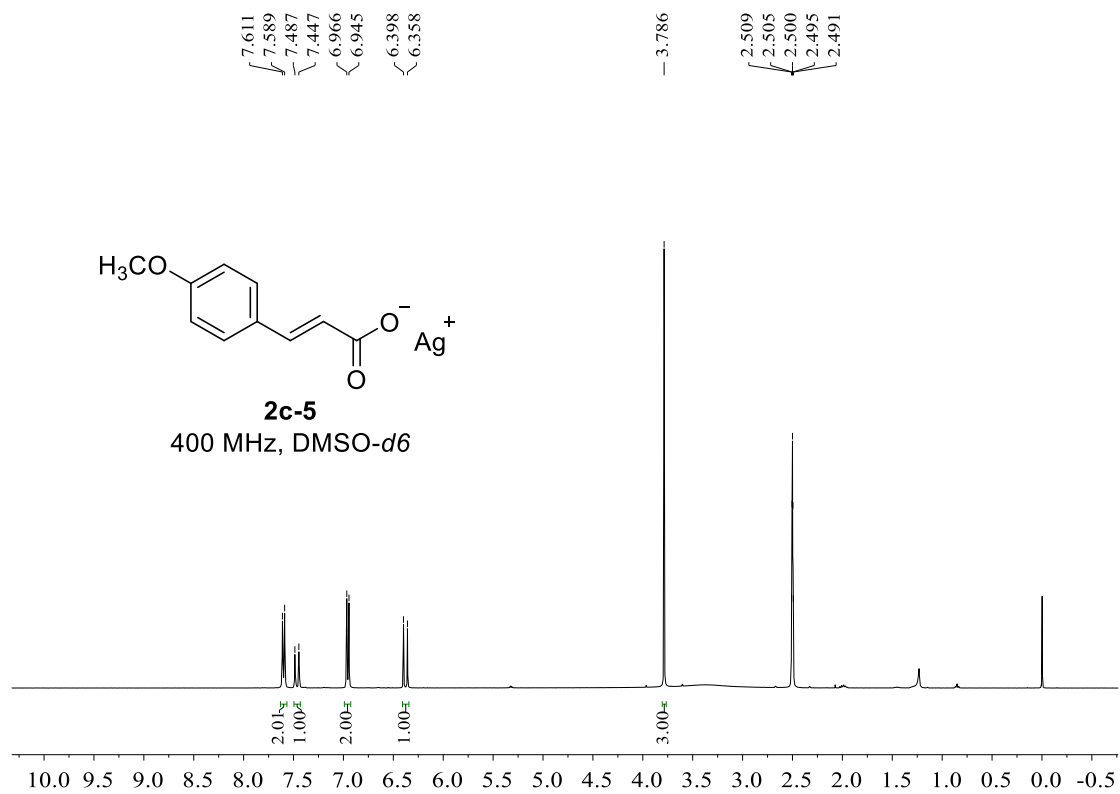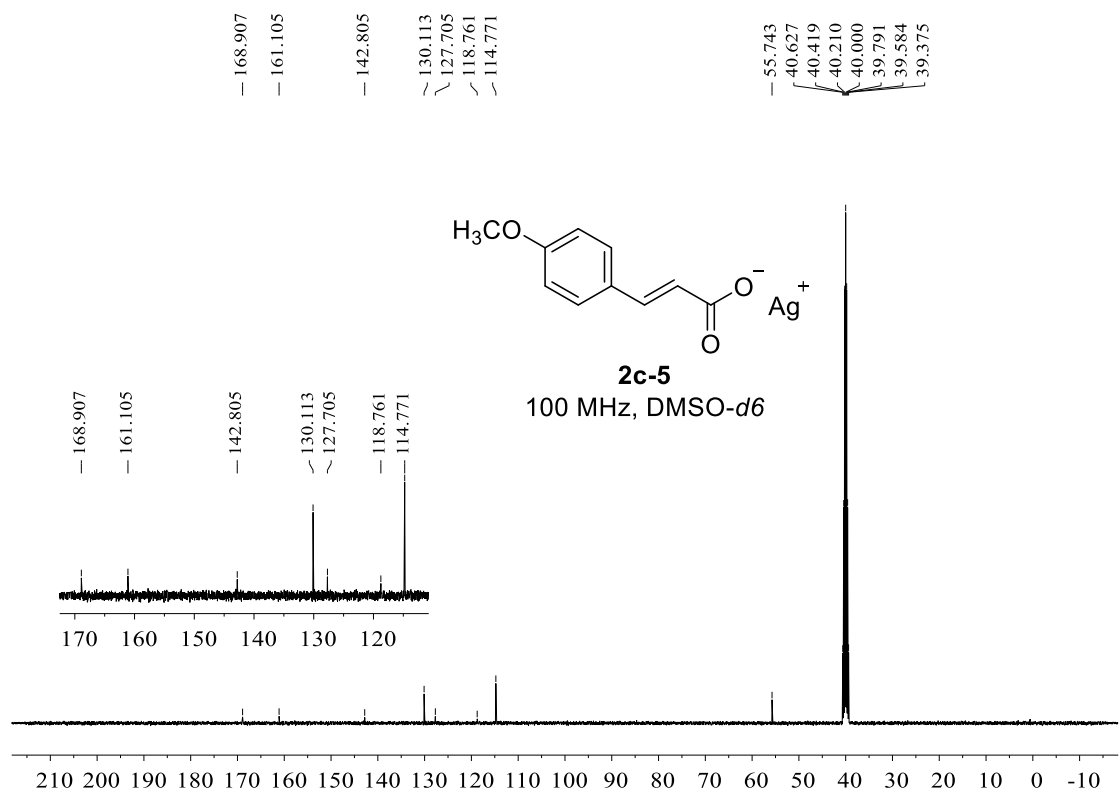

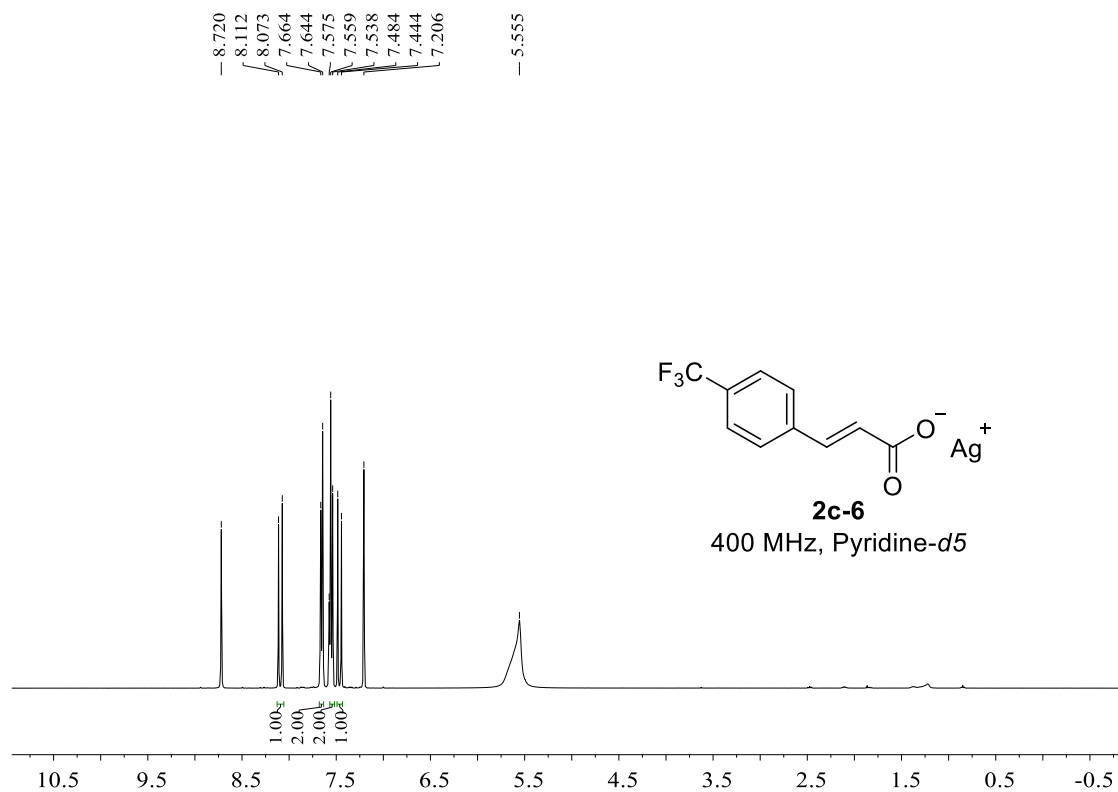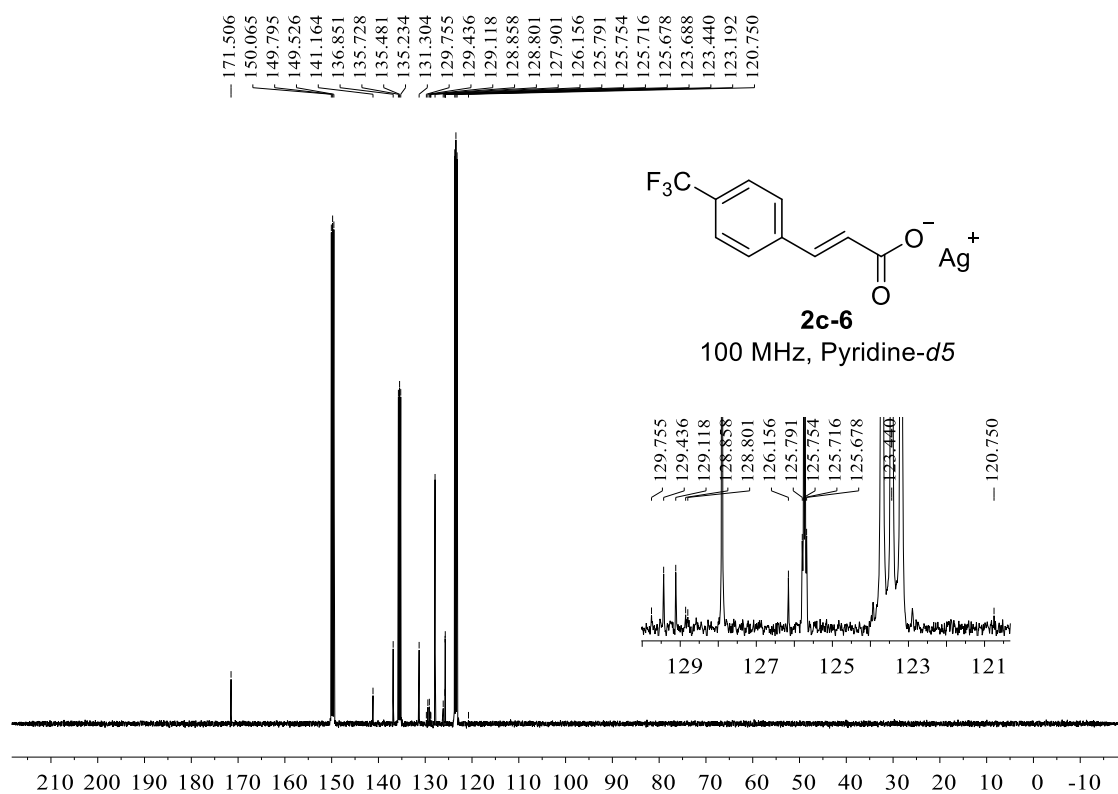



--61.912

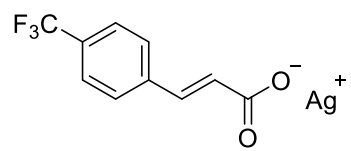

376 MHz, Pyridine-*d*5

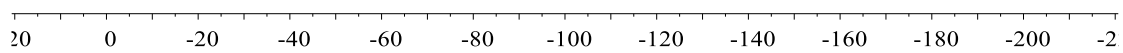

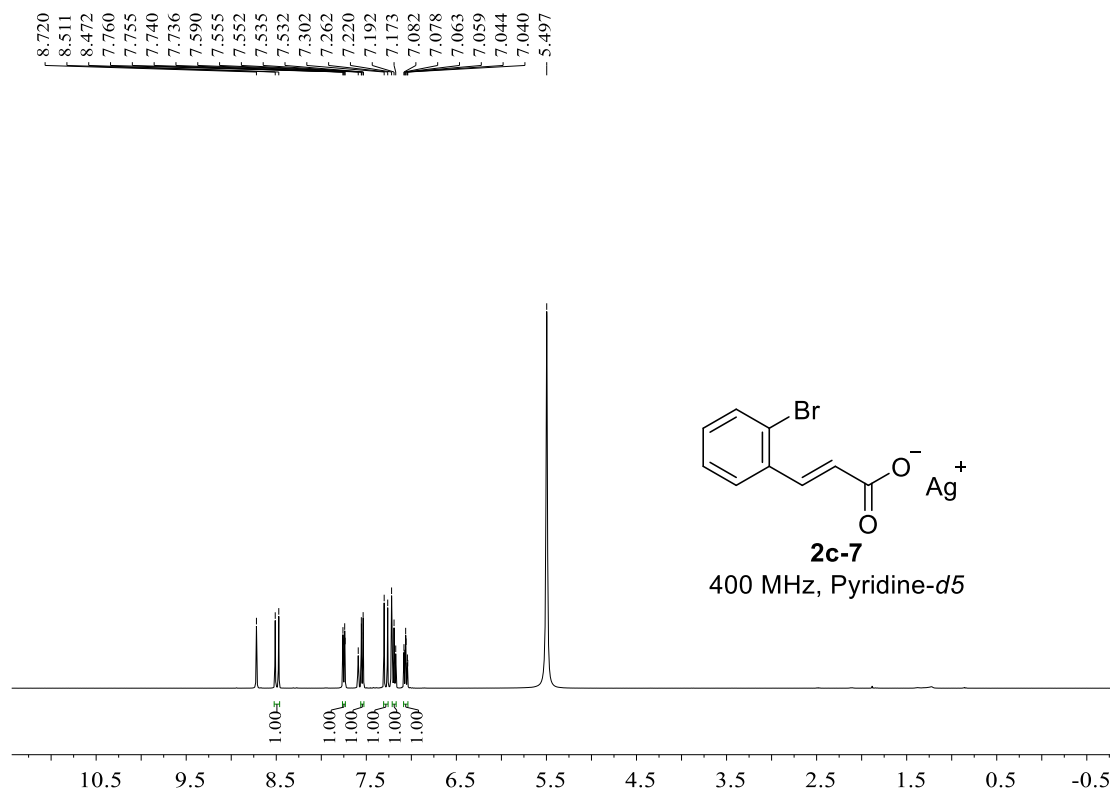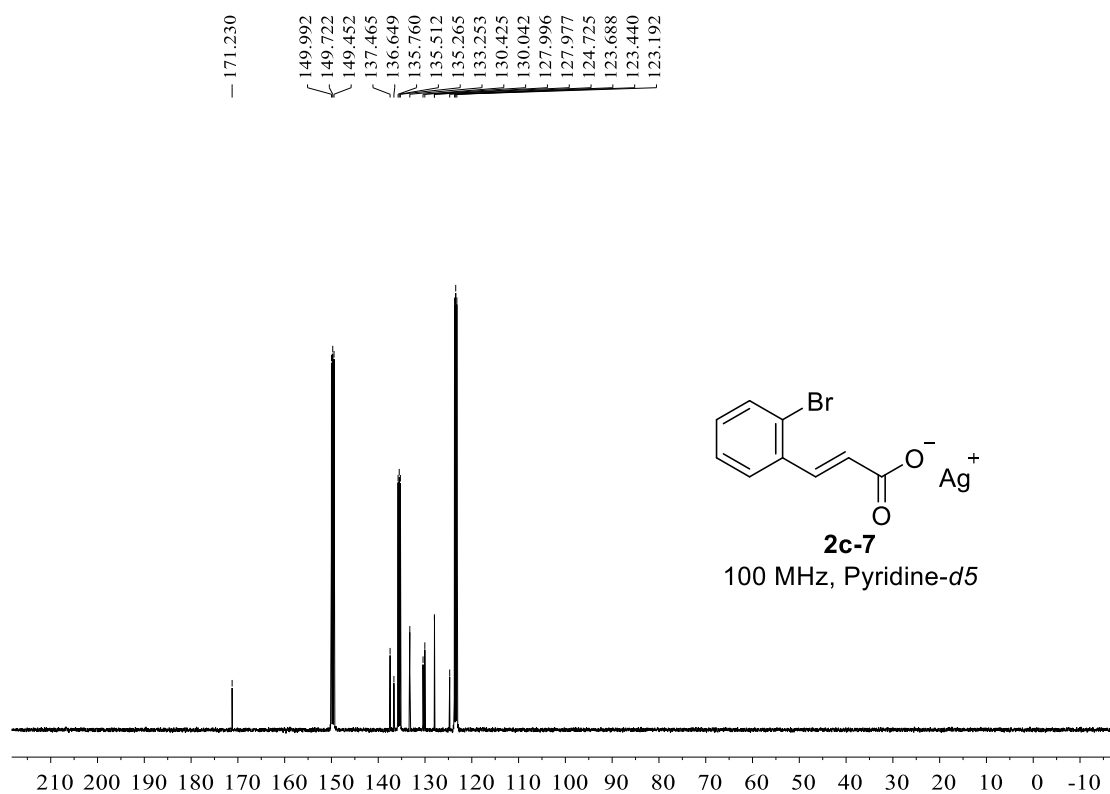

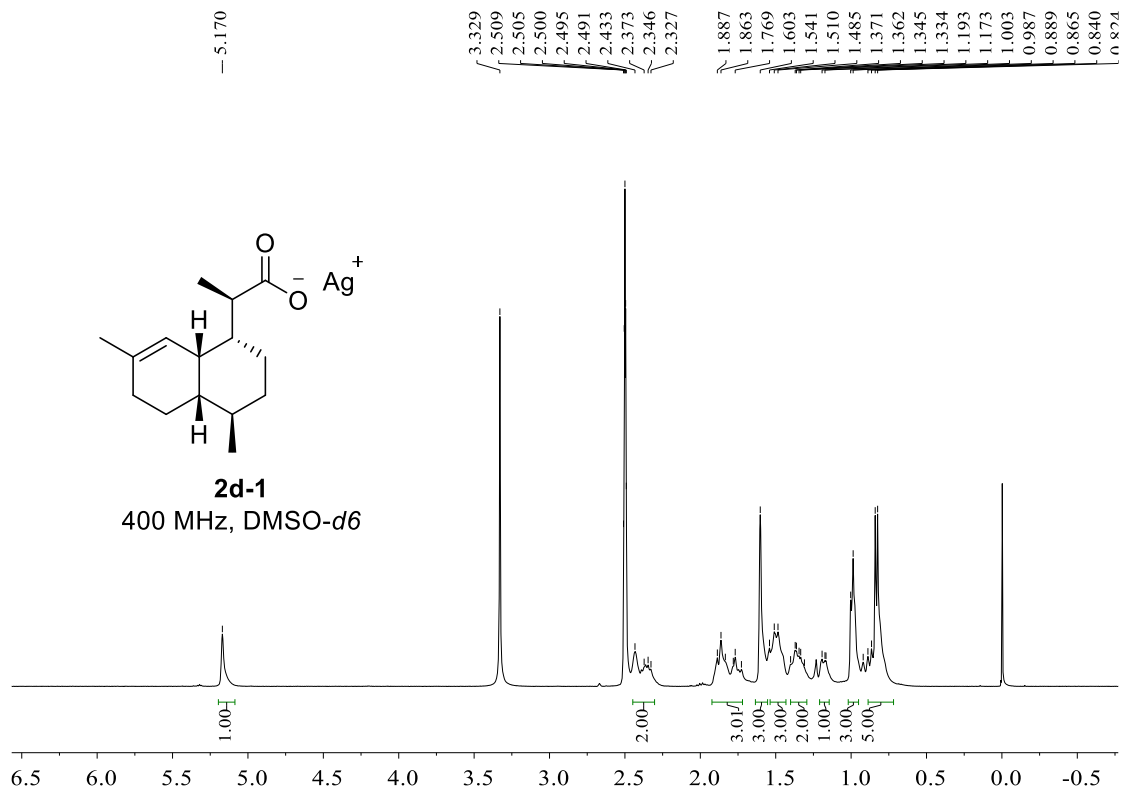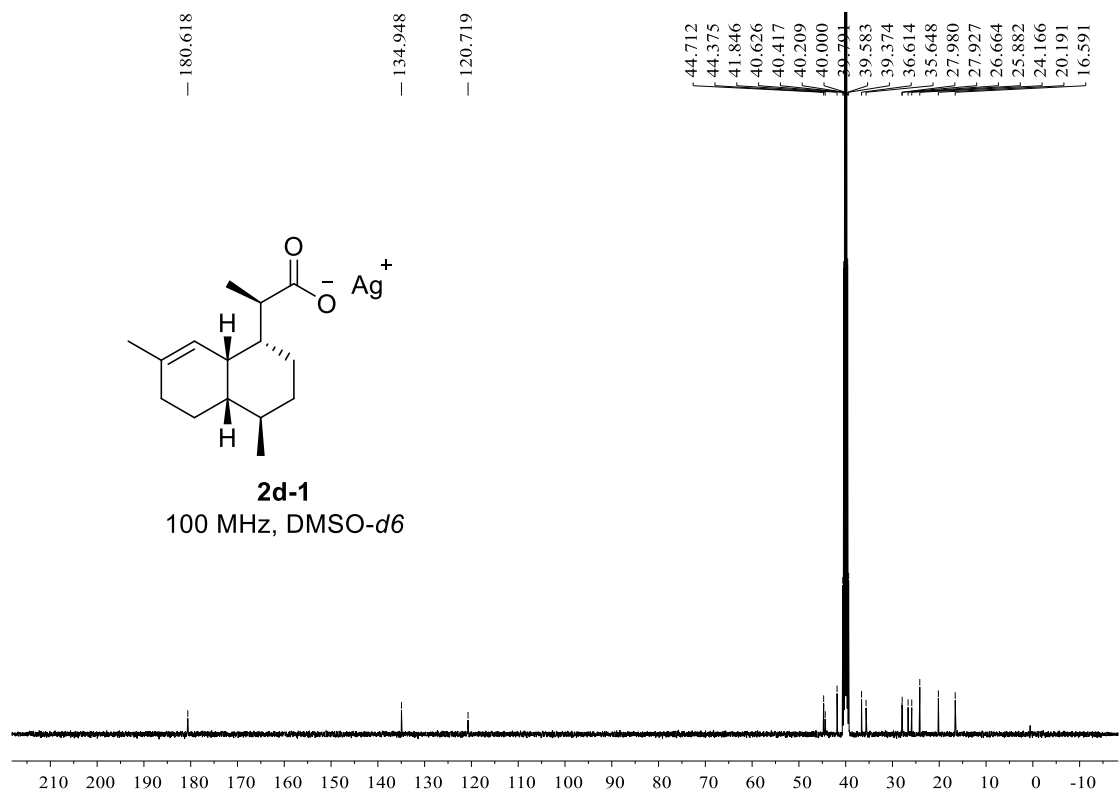



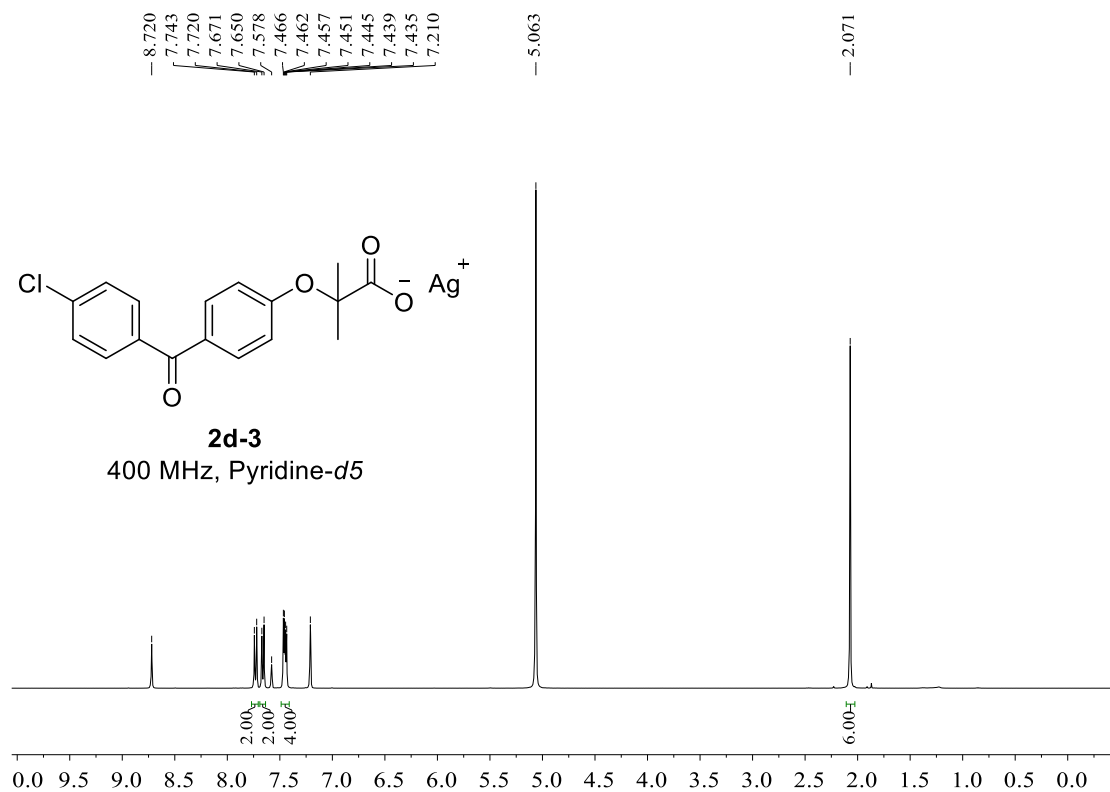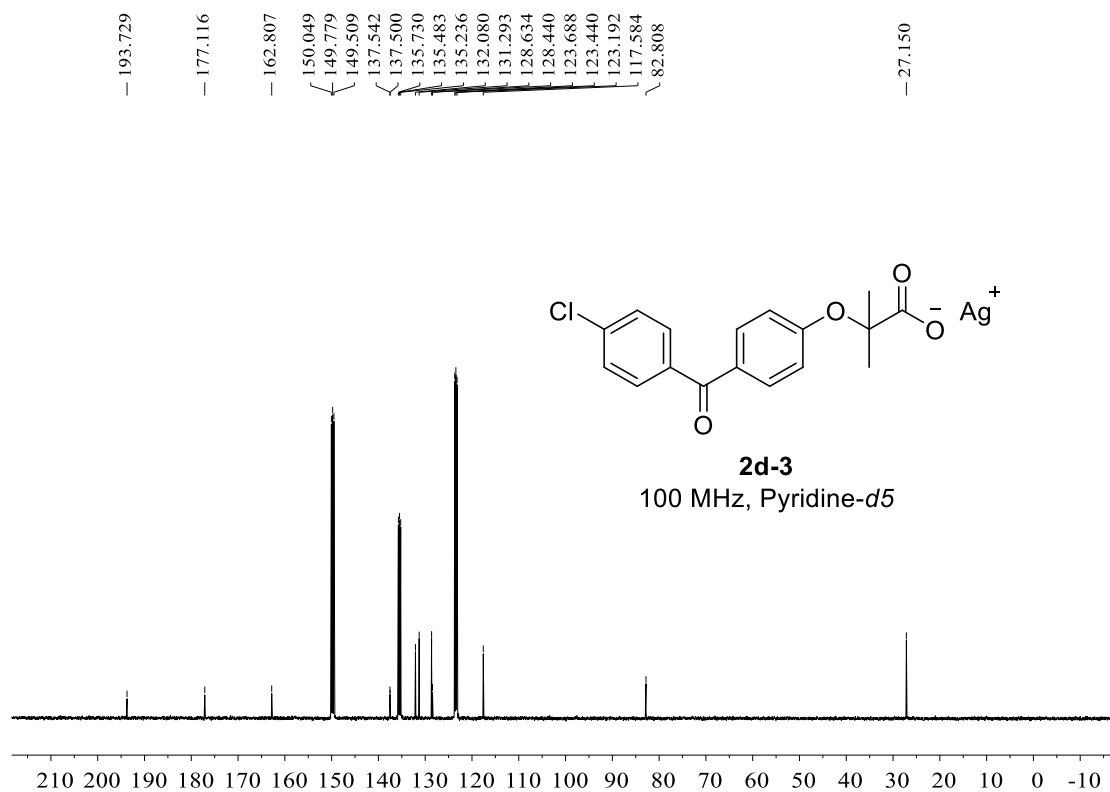

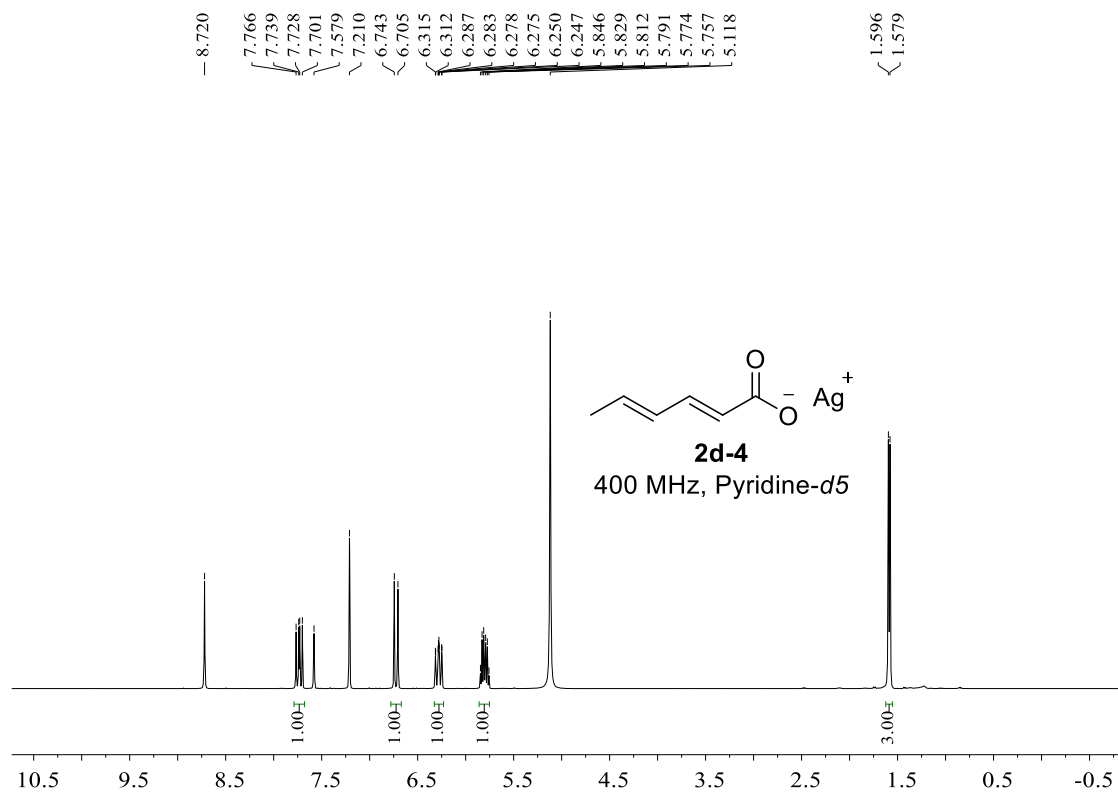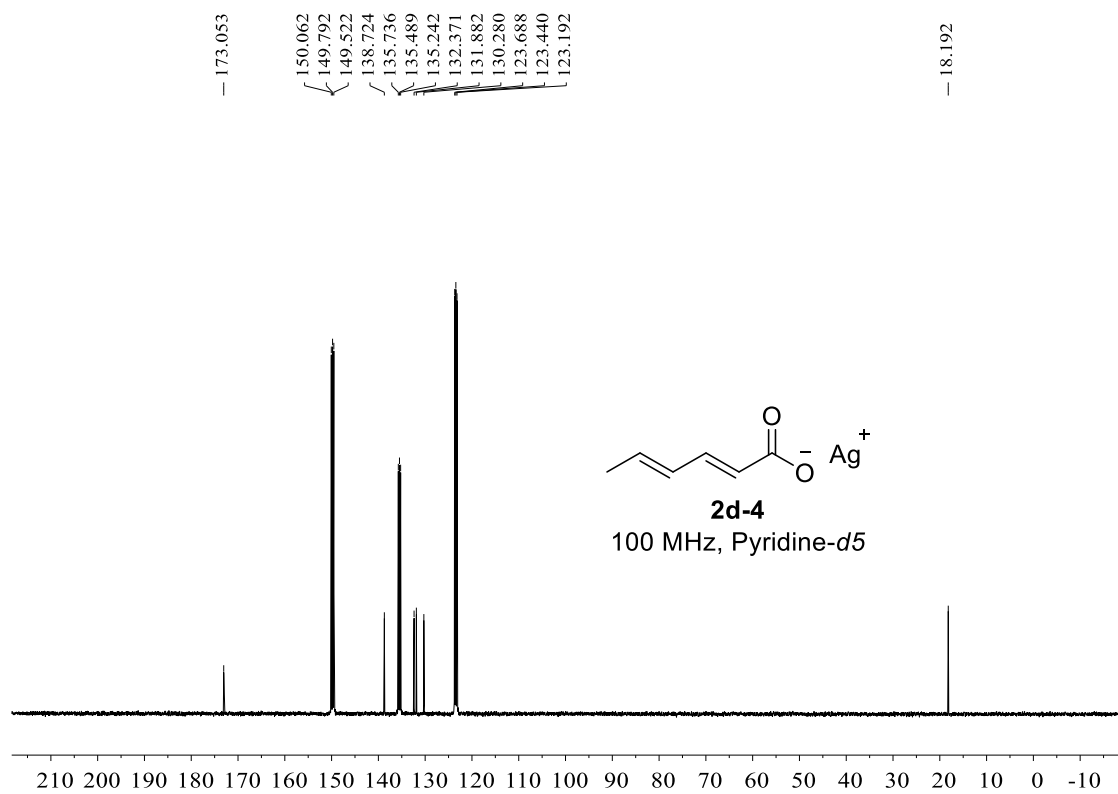

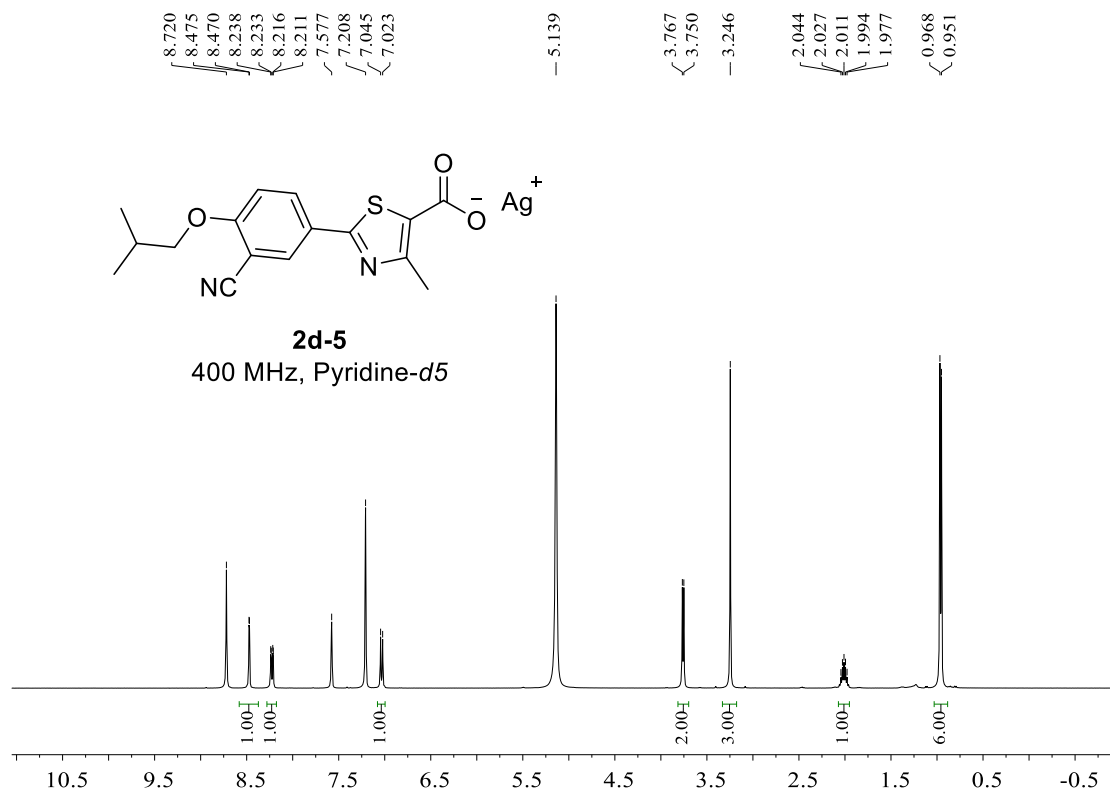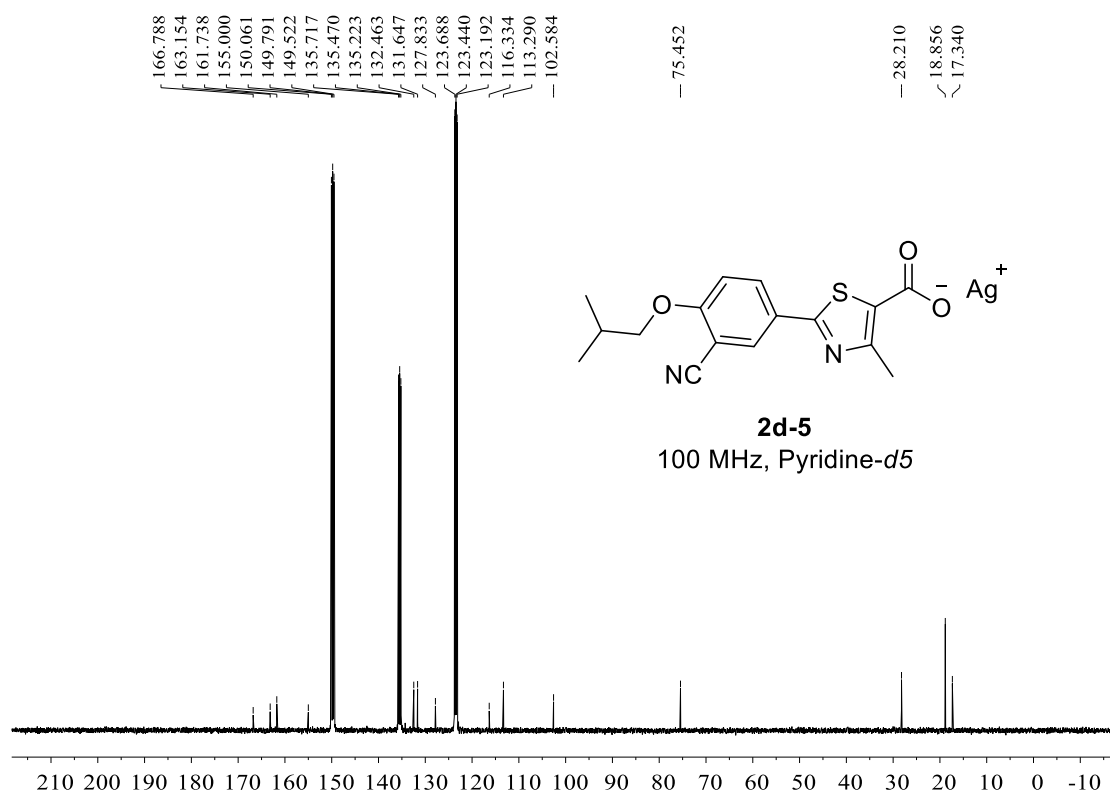

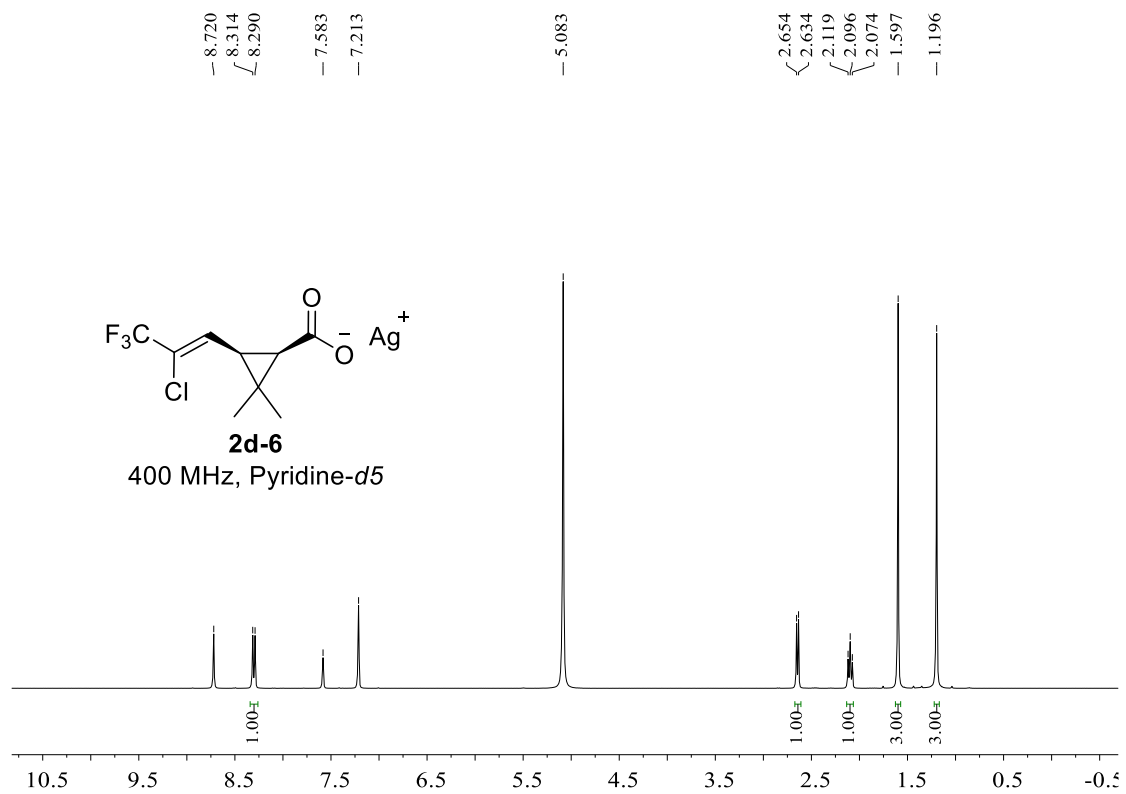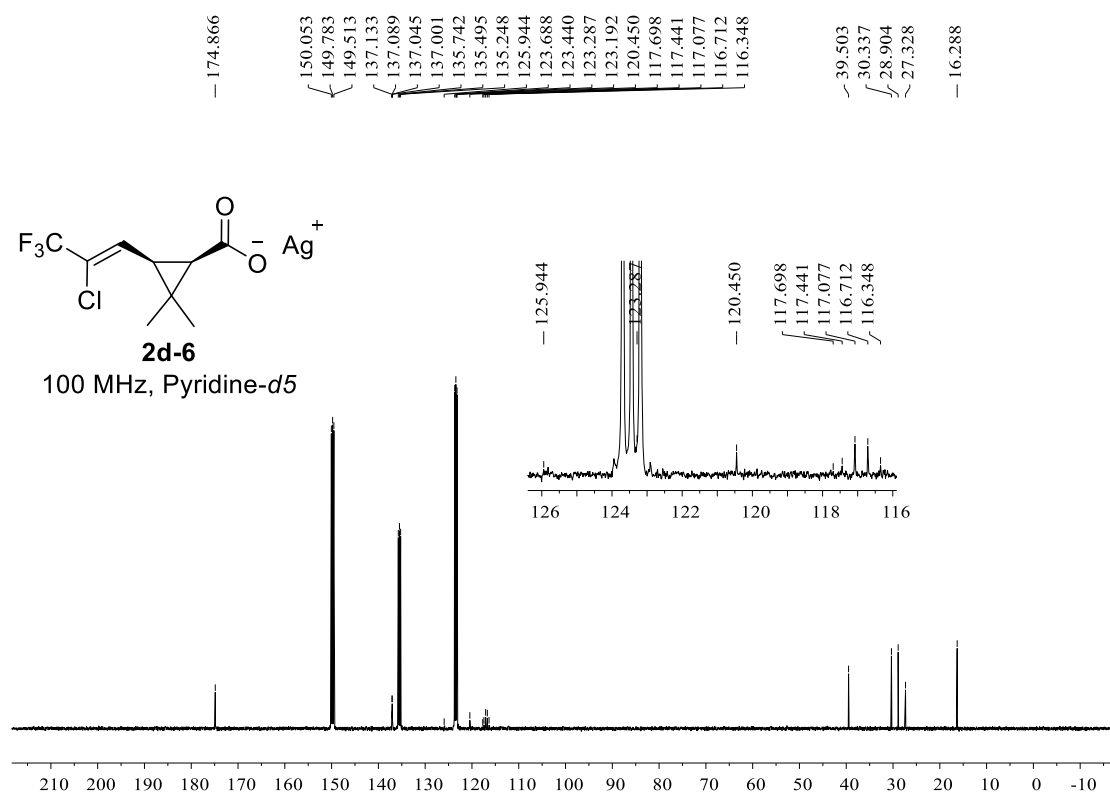



— 67.231

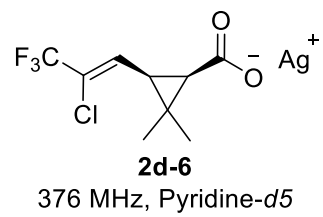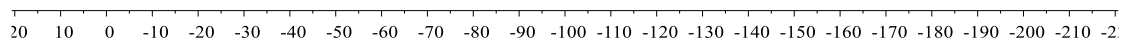

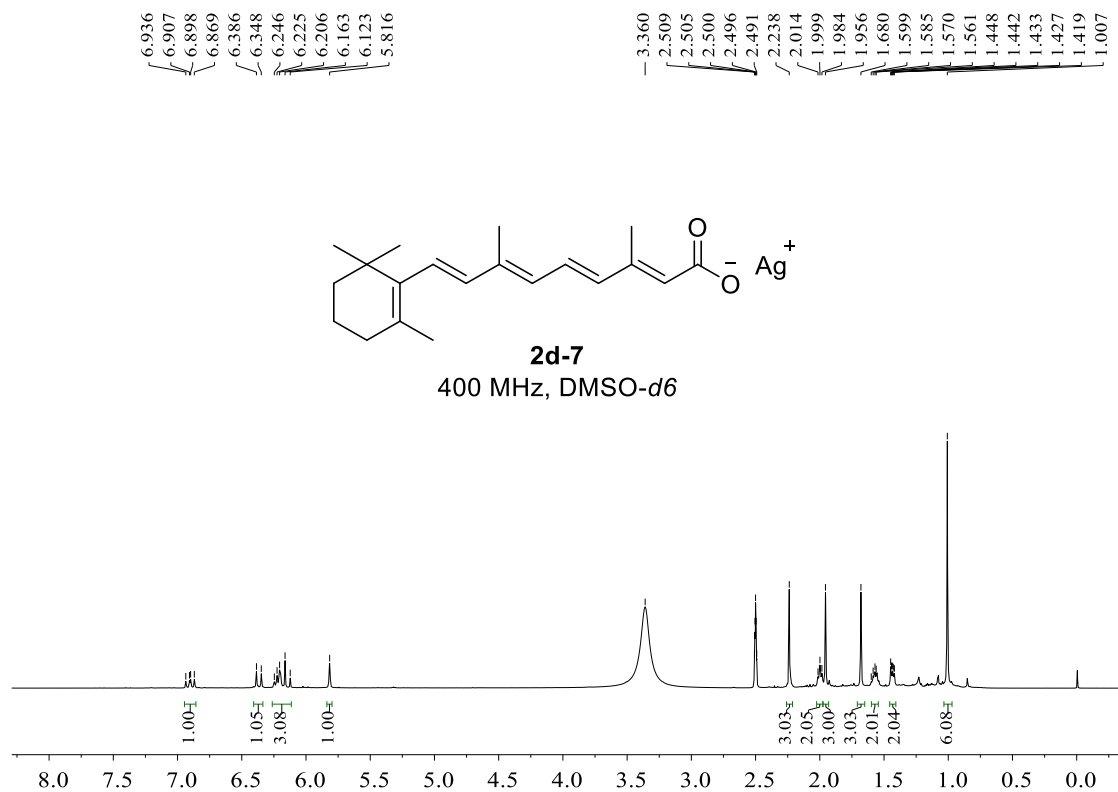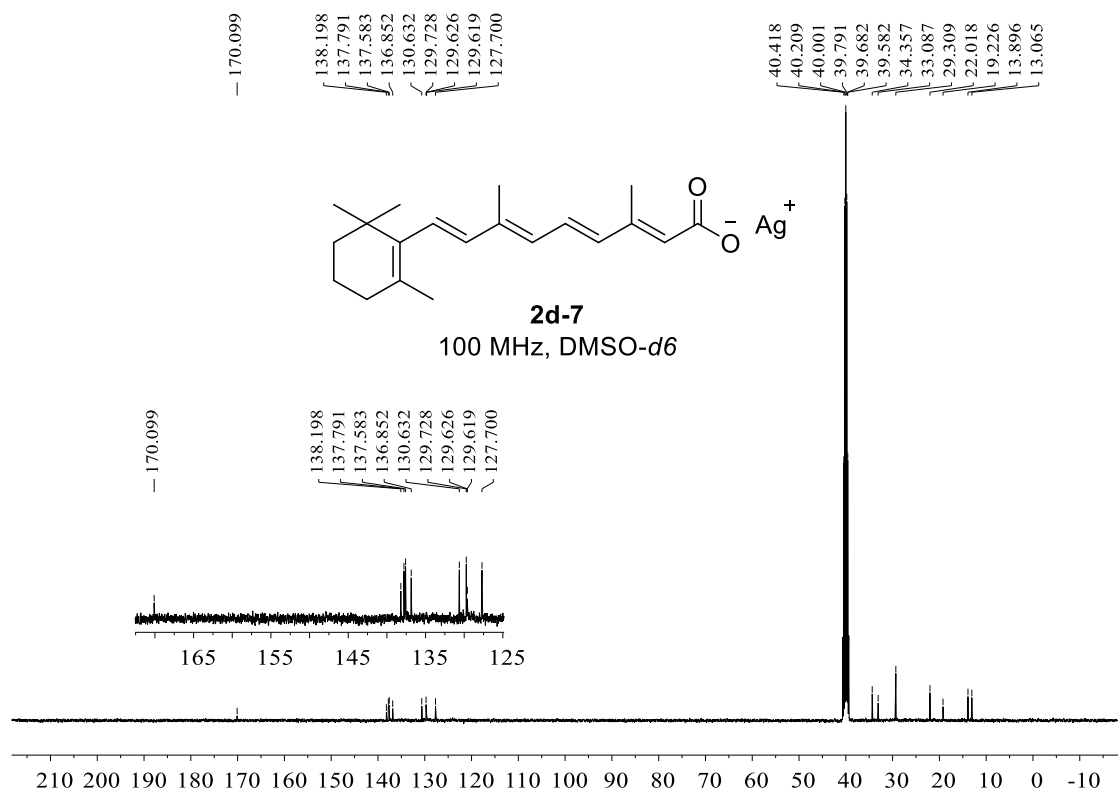

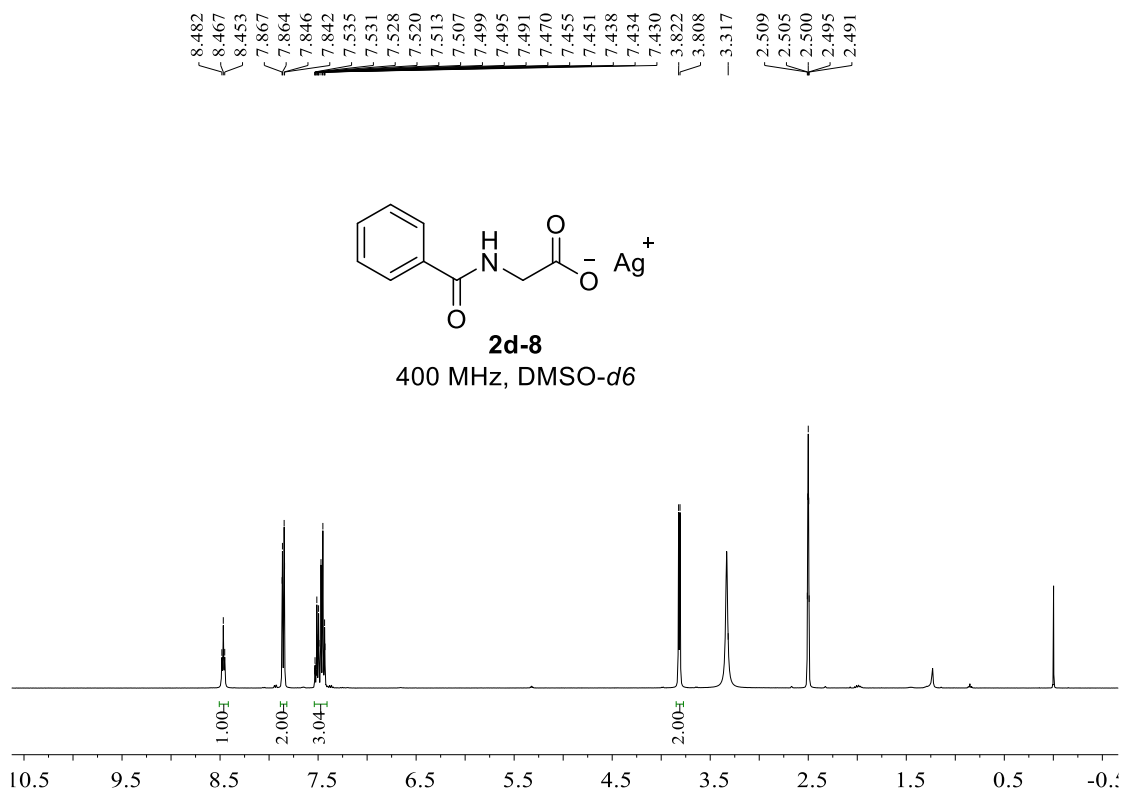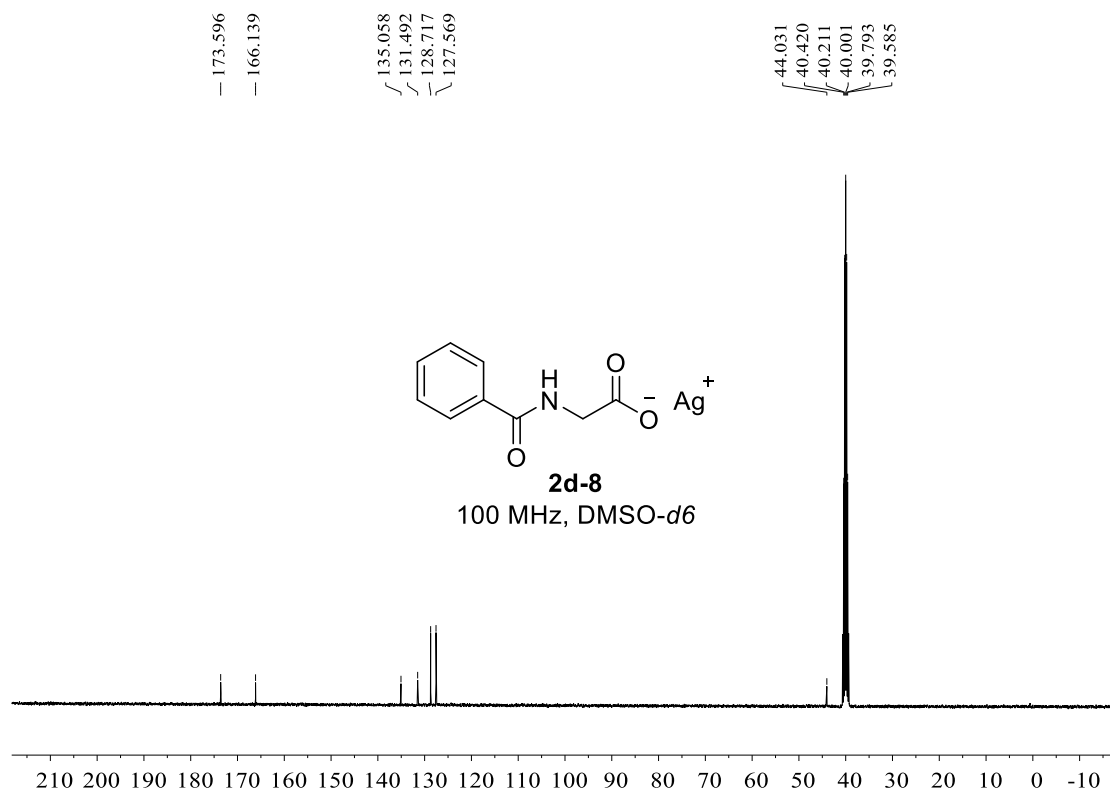

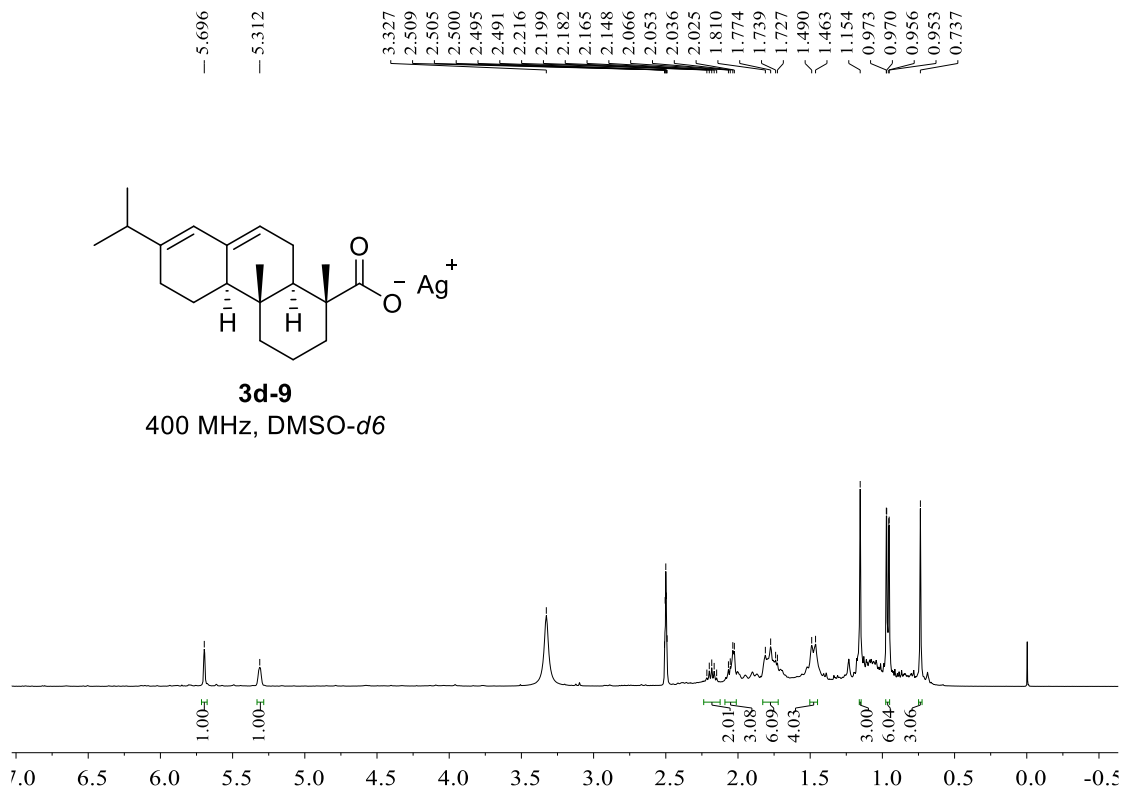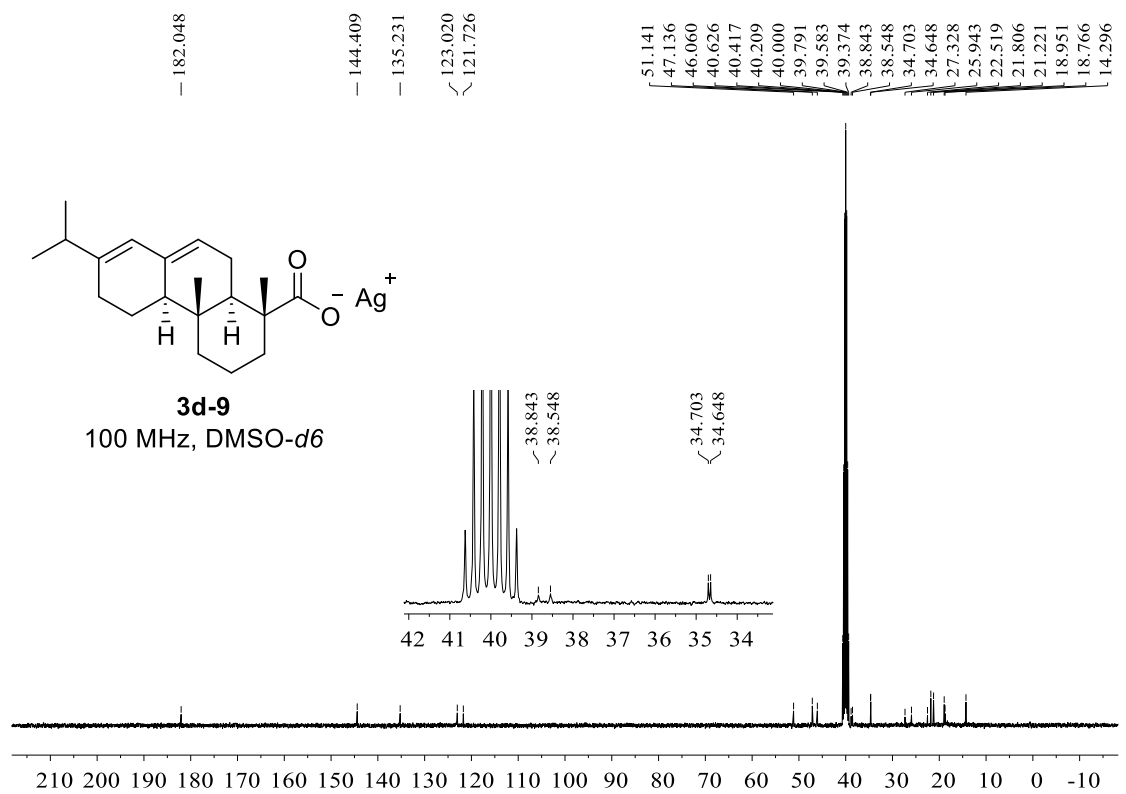

- 9.066  
 - 8.720  
 - 8.259  
 - 7.592  
 - 7.219  
 - 7.136  
 - 6.083  
 - 5.104  
 - 4.047  
 - 4.032  
 - 1.151  
 - 1.137  
 - 1.118

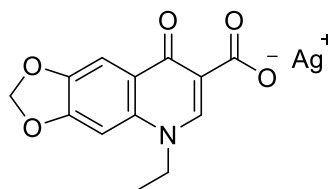

**3d-10**  
400 MHz, Pyridine-*d*5

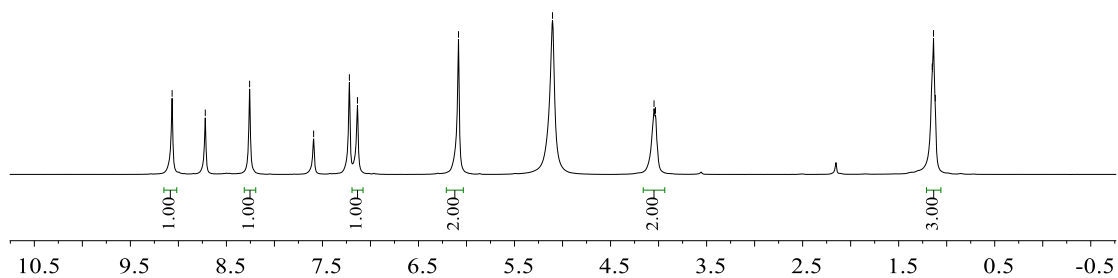

- 175.209  
 - 170.840  
 - 151.965  
 - 150.028  
 - 149.759  
 - 149.489  
 - 146.692  
 - 145.727  
 - 136.320  
 - 135.751  
 - 135.504  
 - 135.257  
 - 125.169  
 - 123.688  
 - 123.440  
 - 123.192  
 - 104.513  
 - 102.513  
 - 95.786  
 - 48.524  
 - 14.265

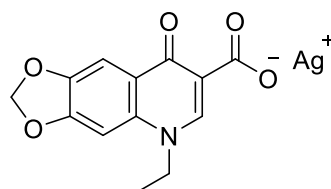

**3d-10**  
100 MHz, Pyridine-*d*5

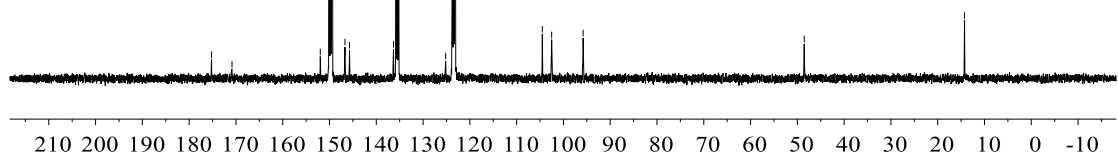

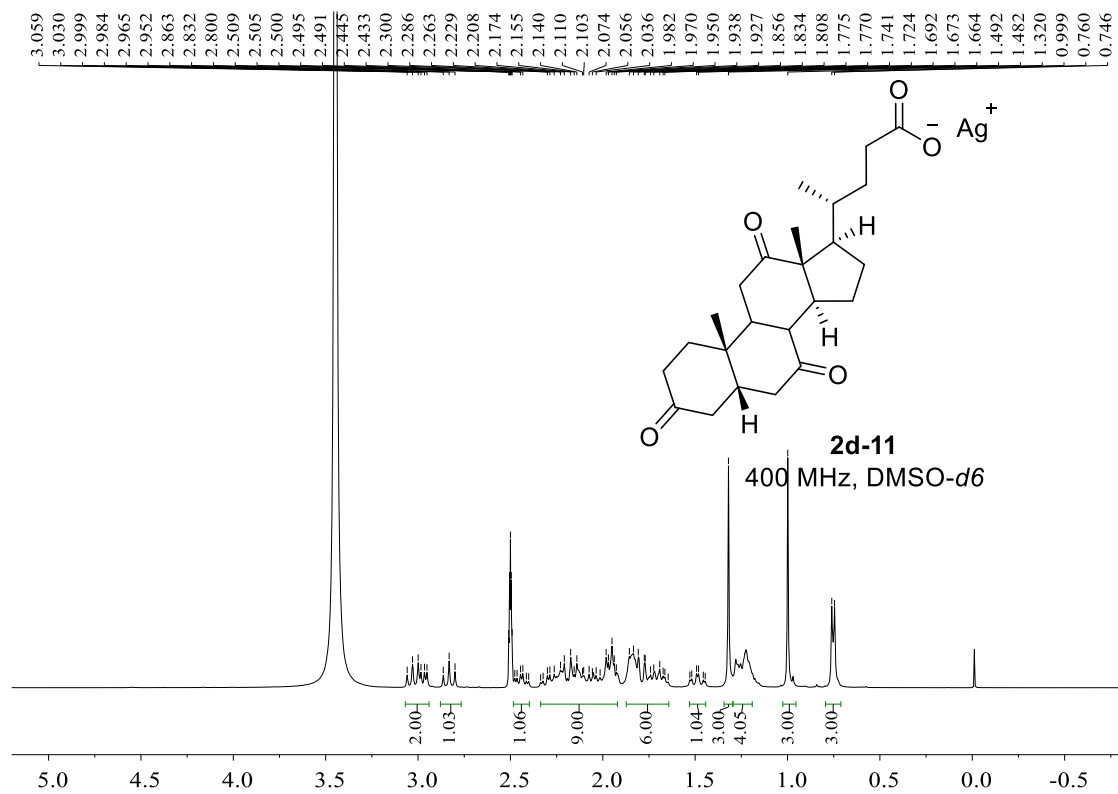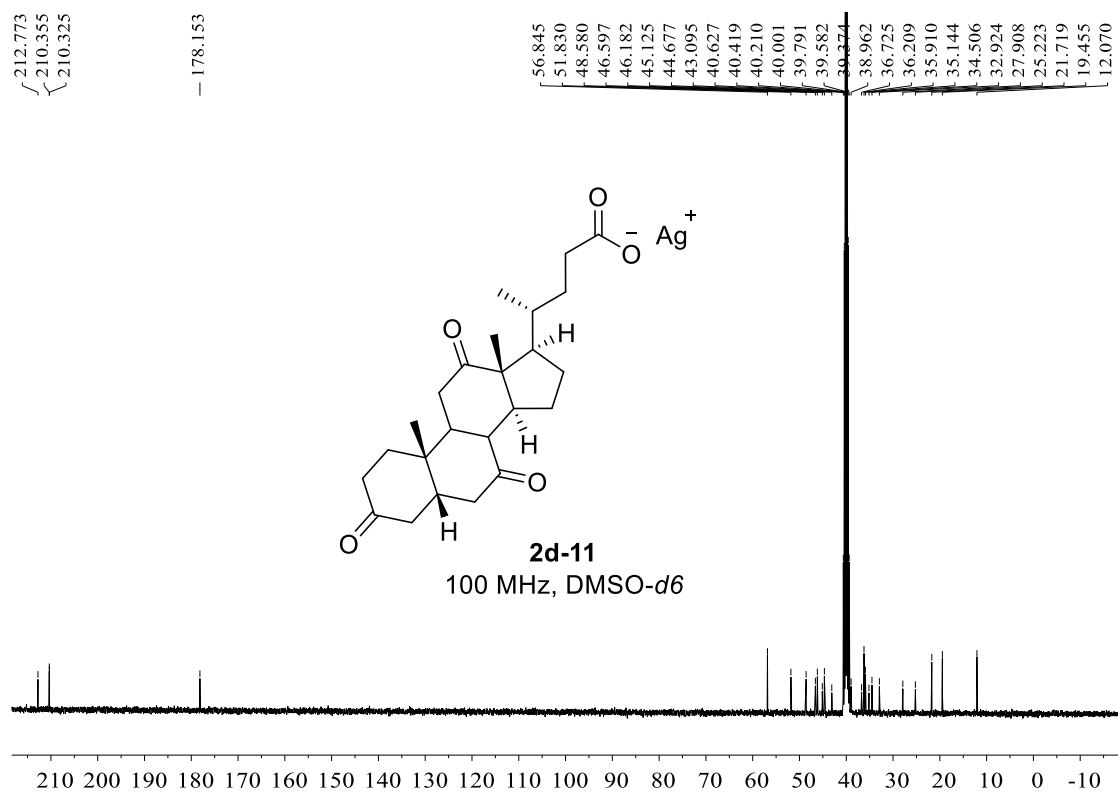

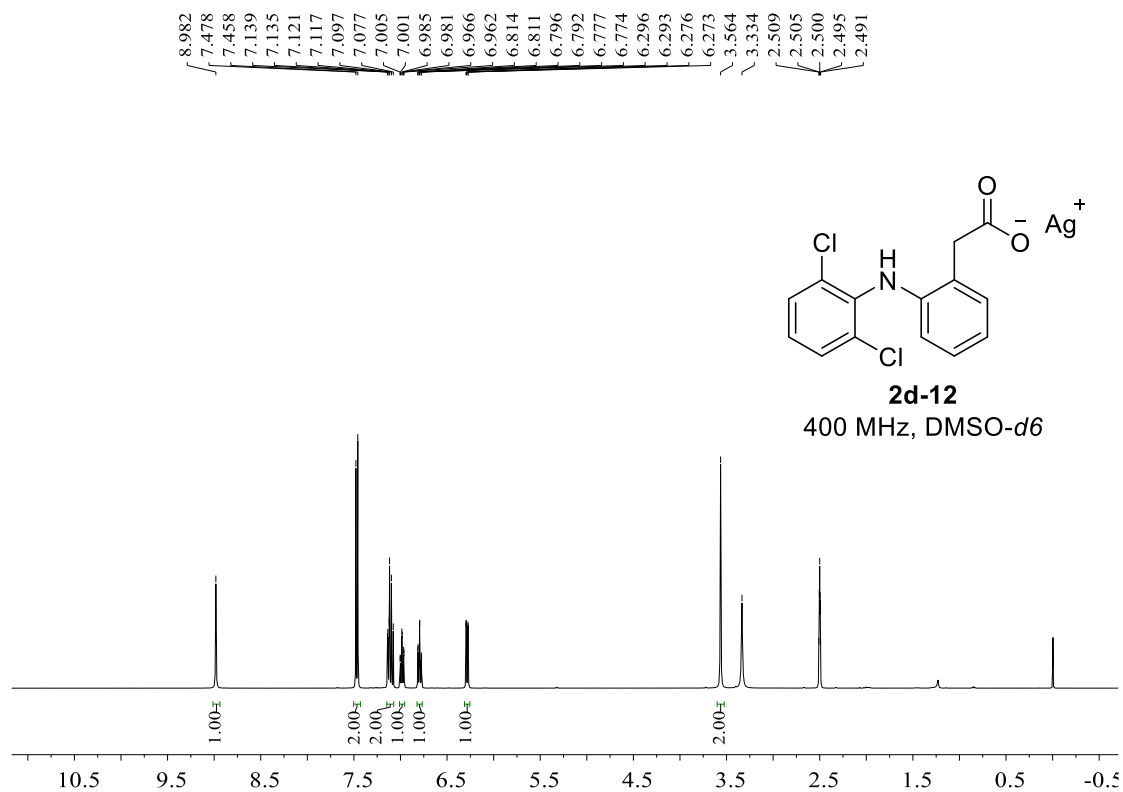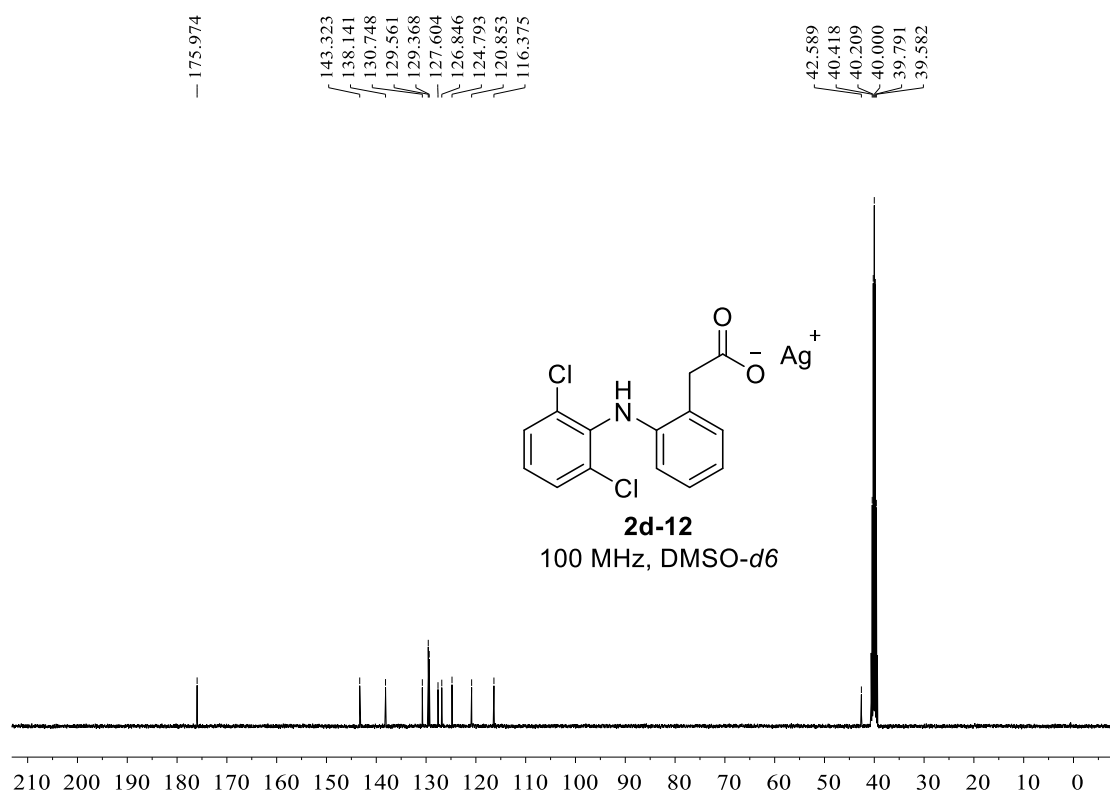

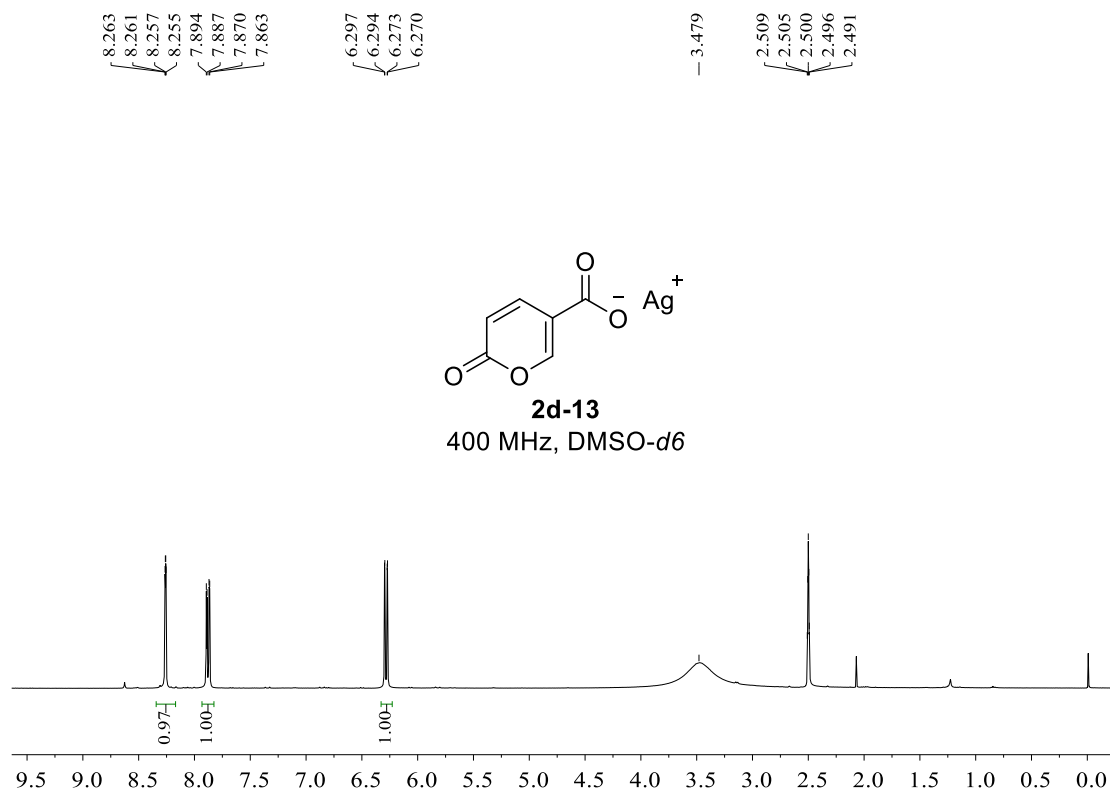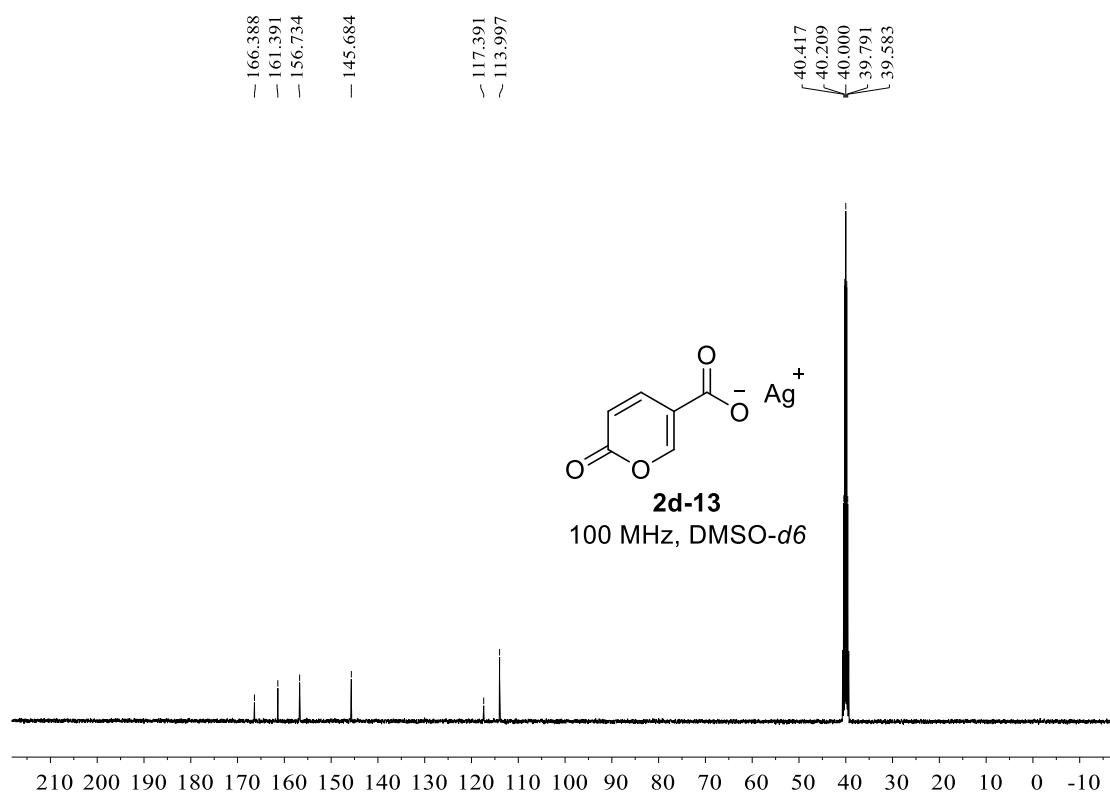



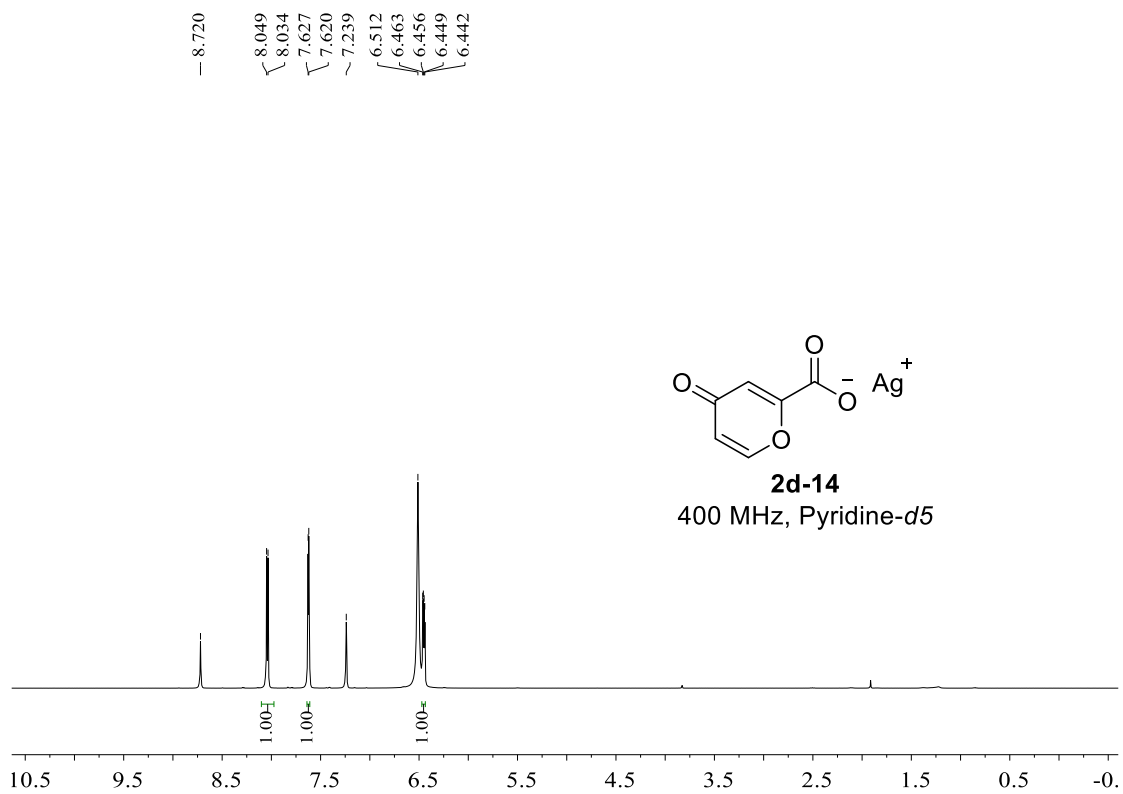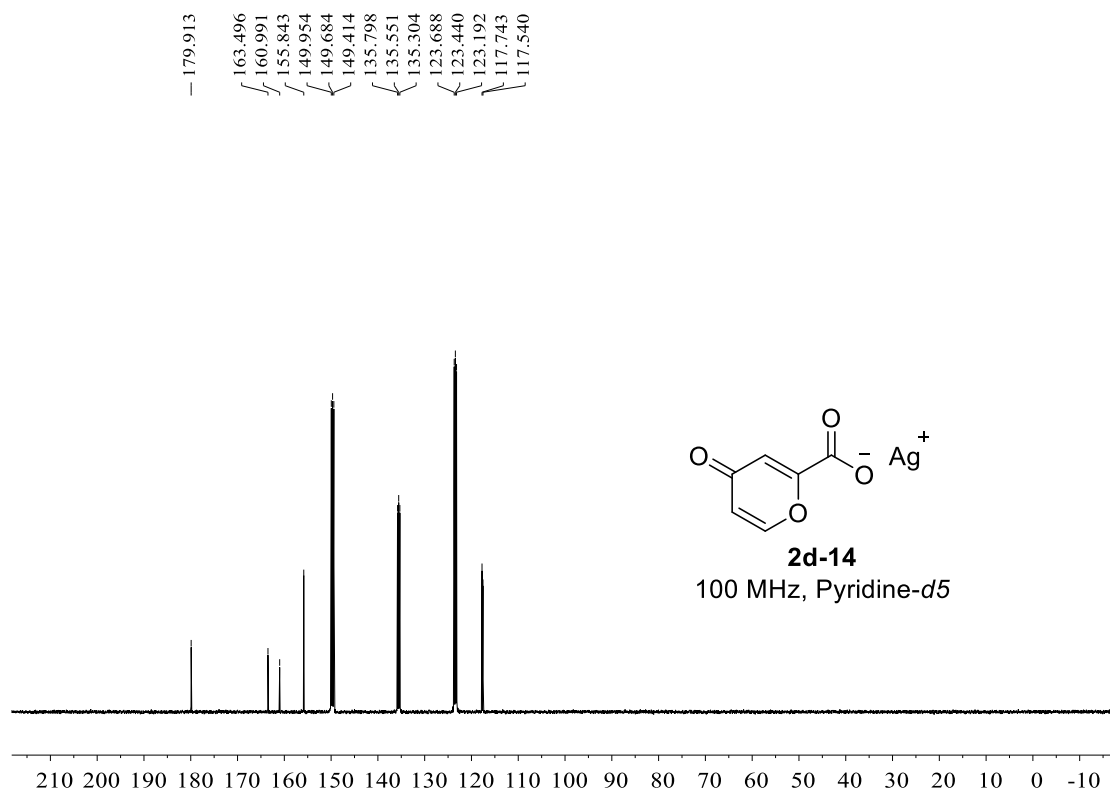

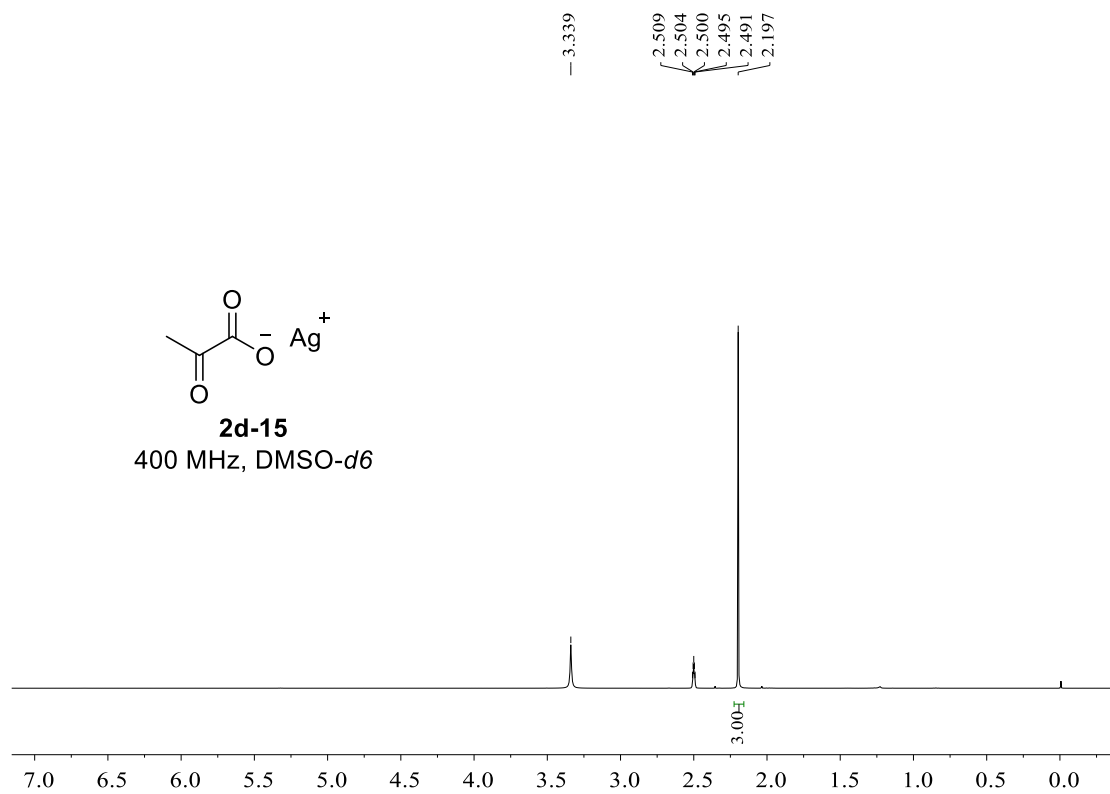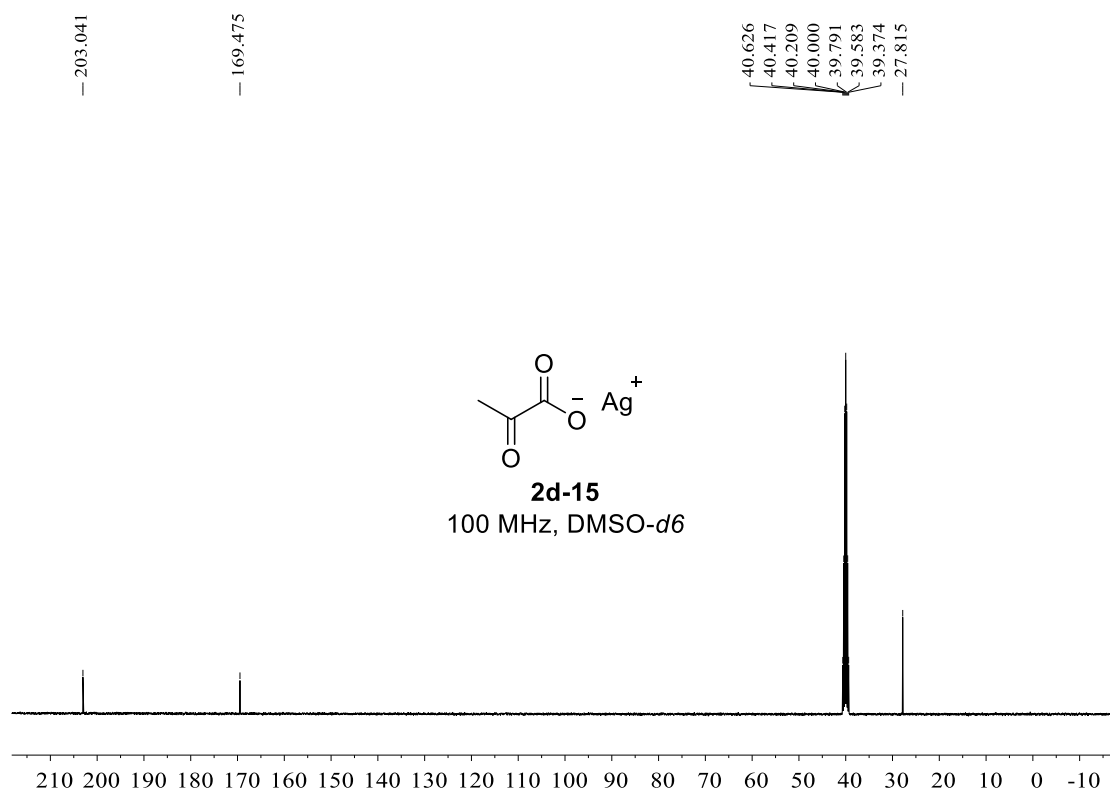

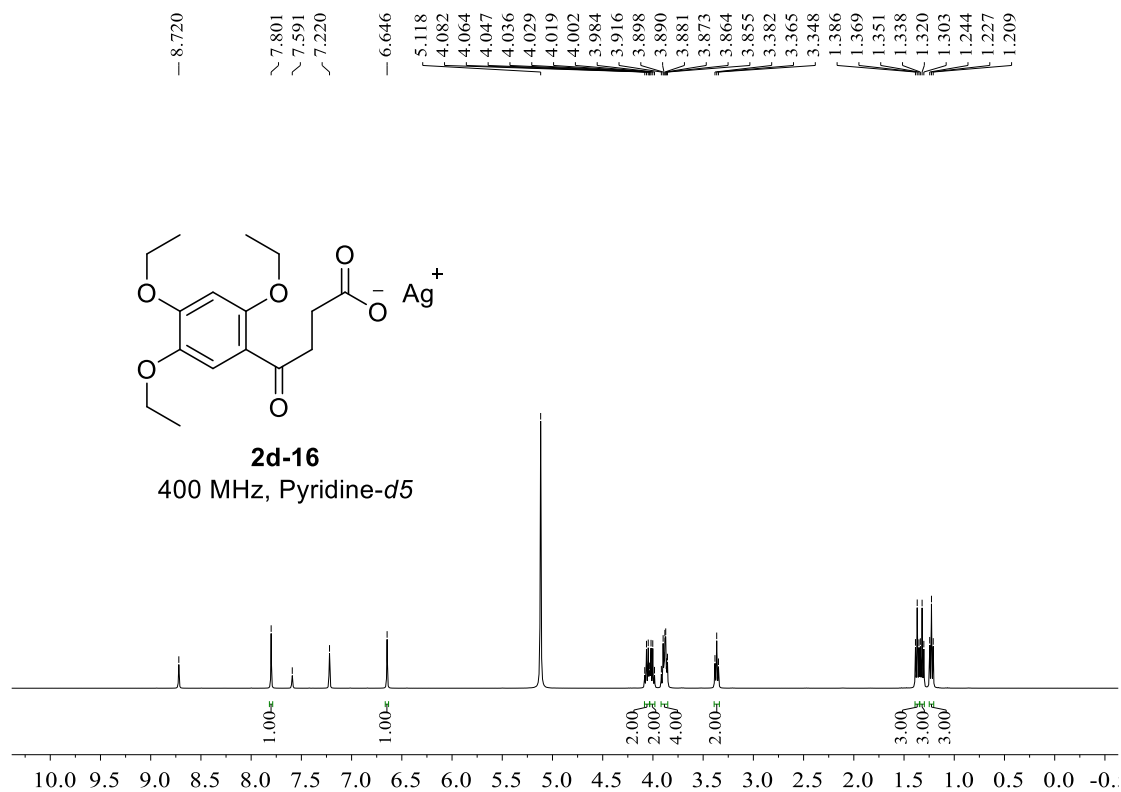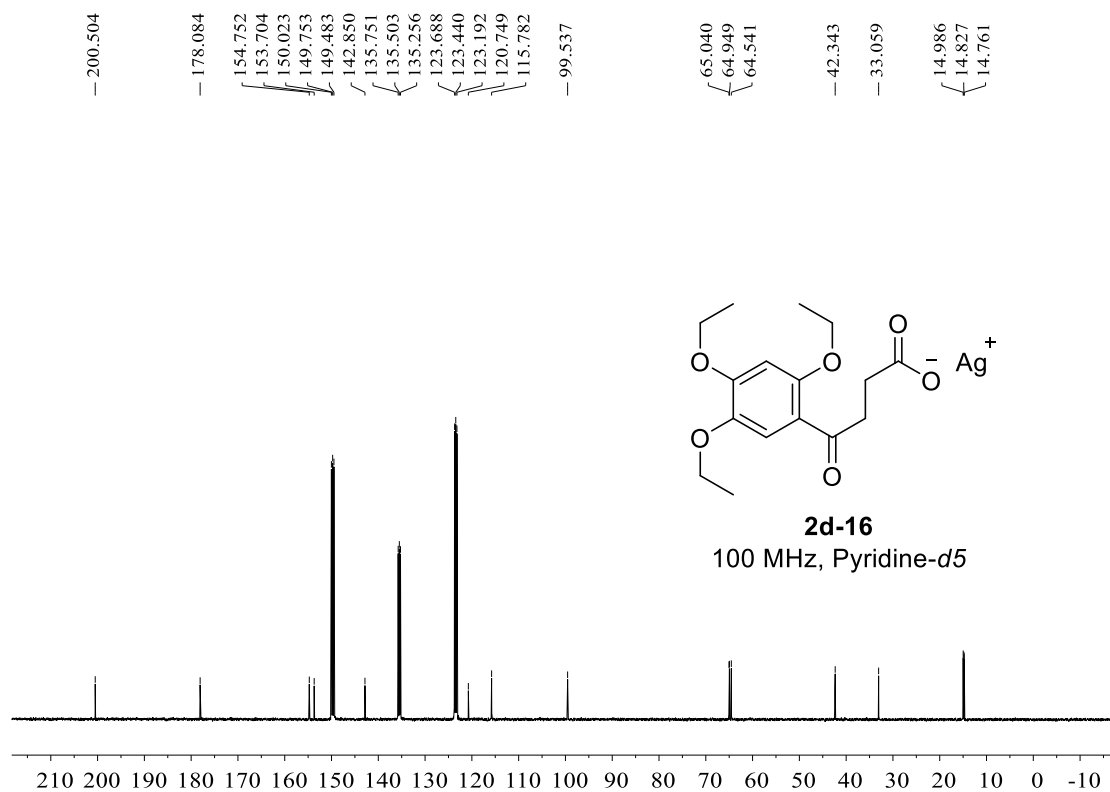

9. Copies of  $^1\text{H}$ ,  $^{13}\text{C}$  and  $^{19}\text{F}$  NMR spectra of products **3aa-1–3wa**

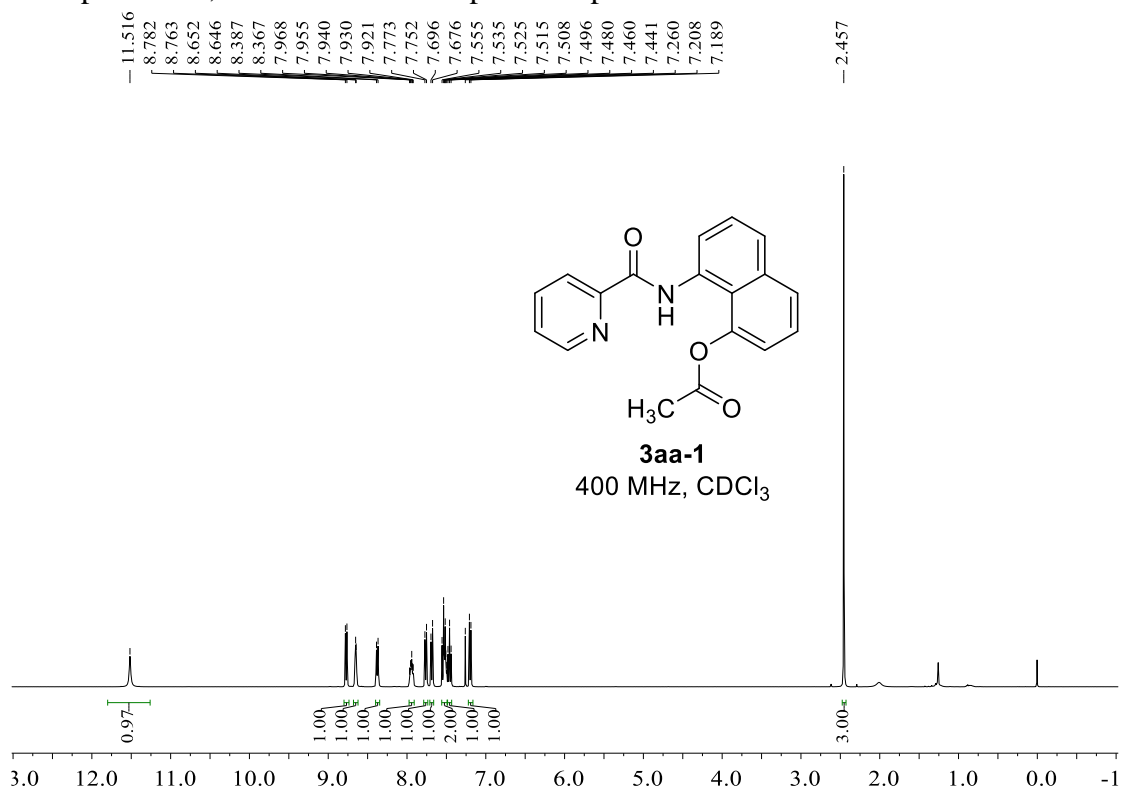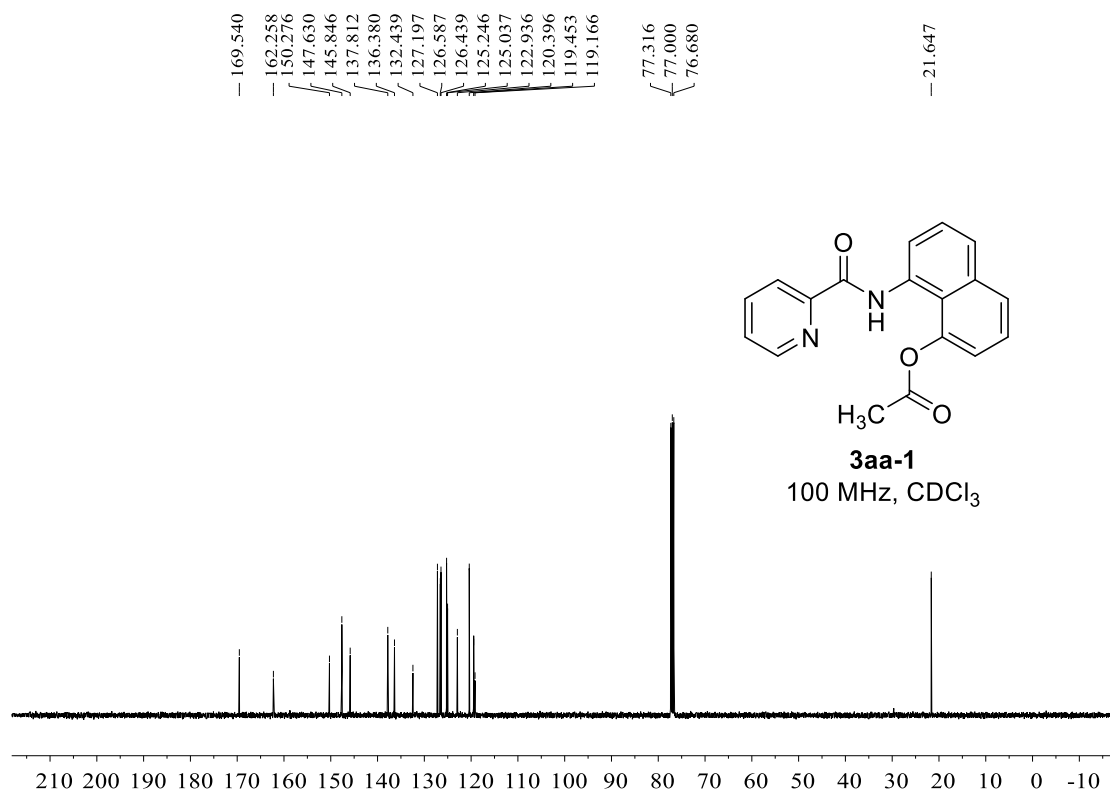

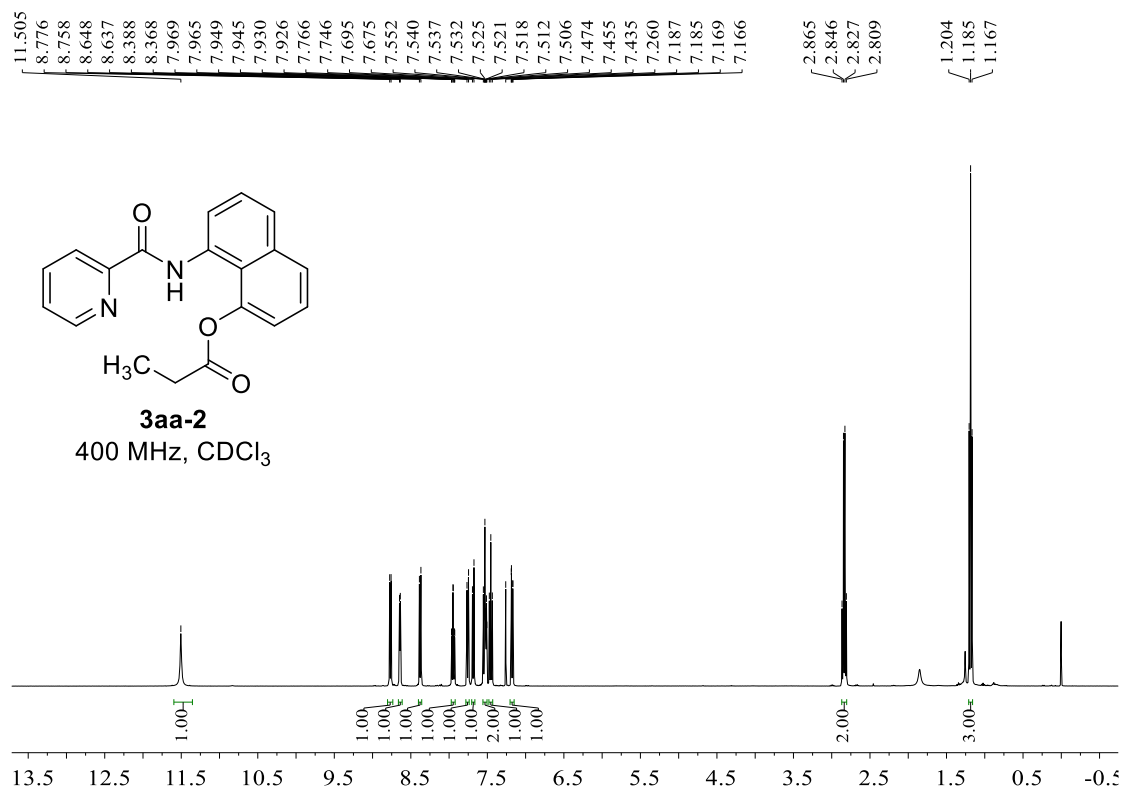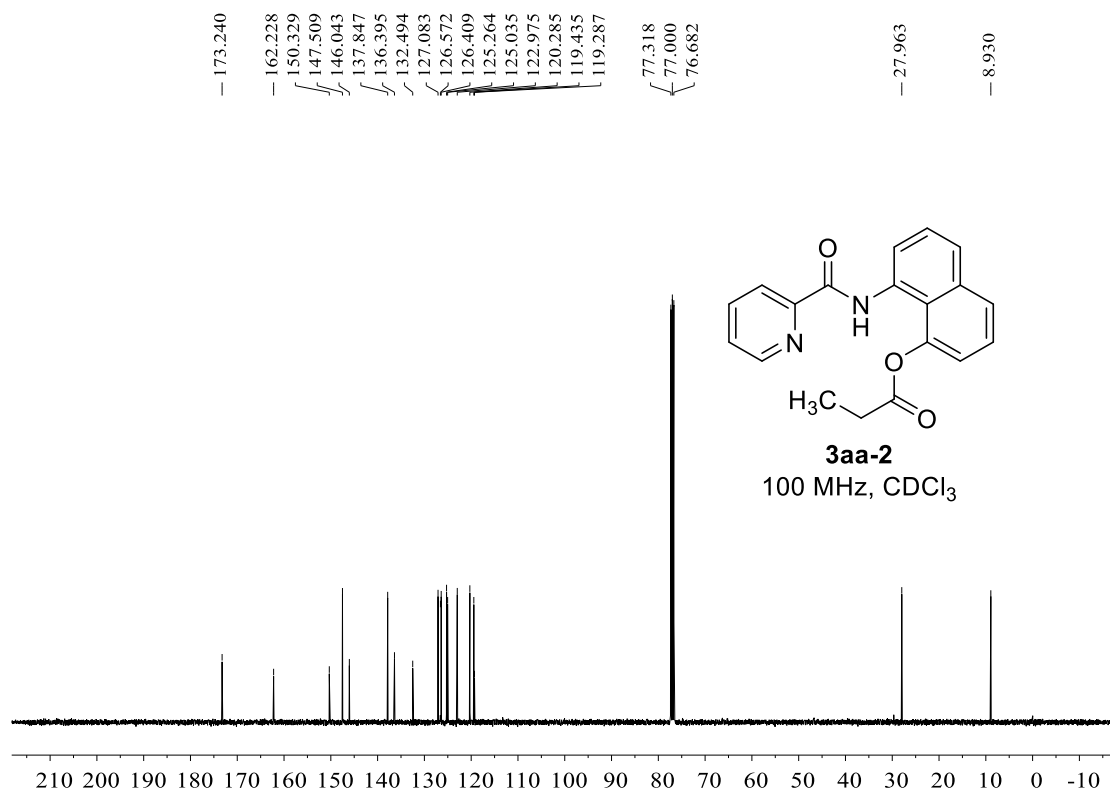

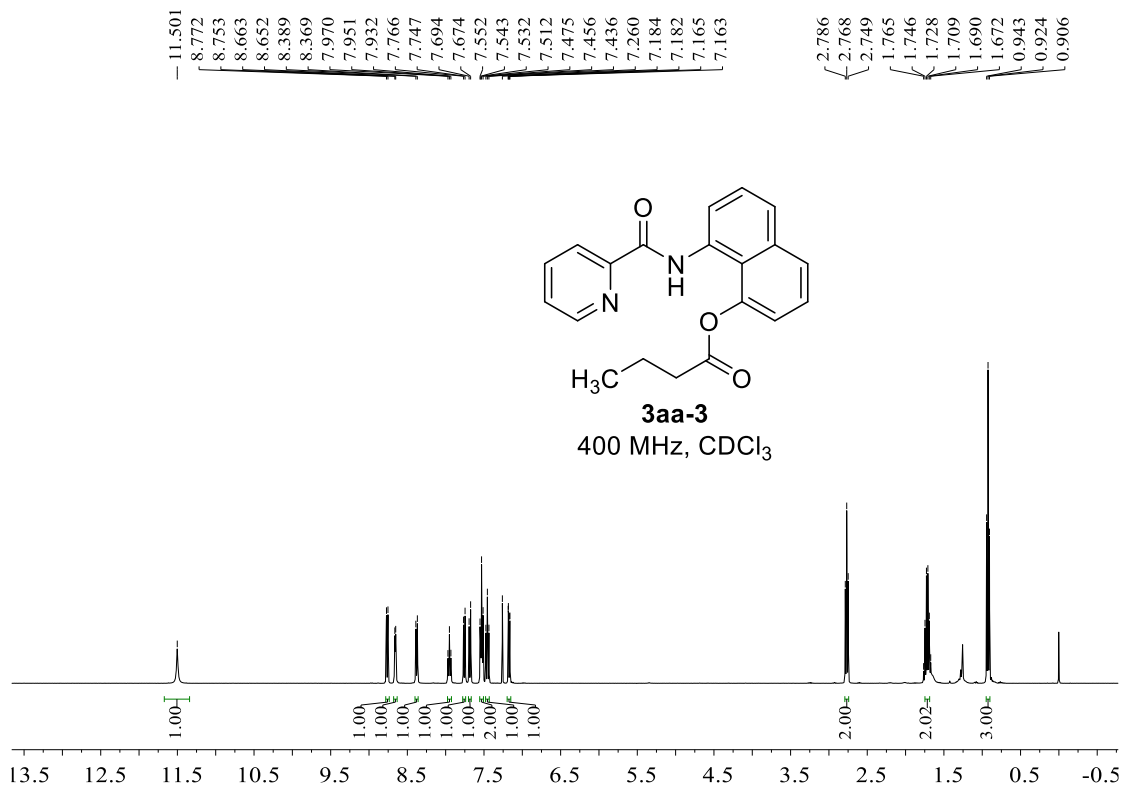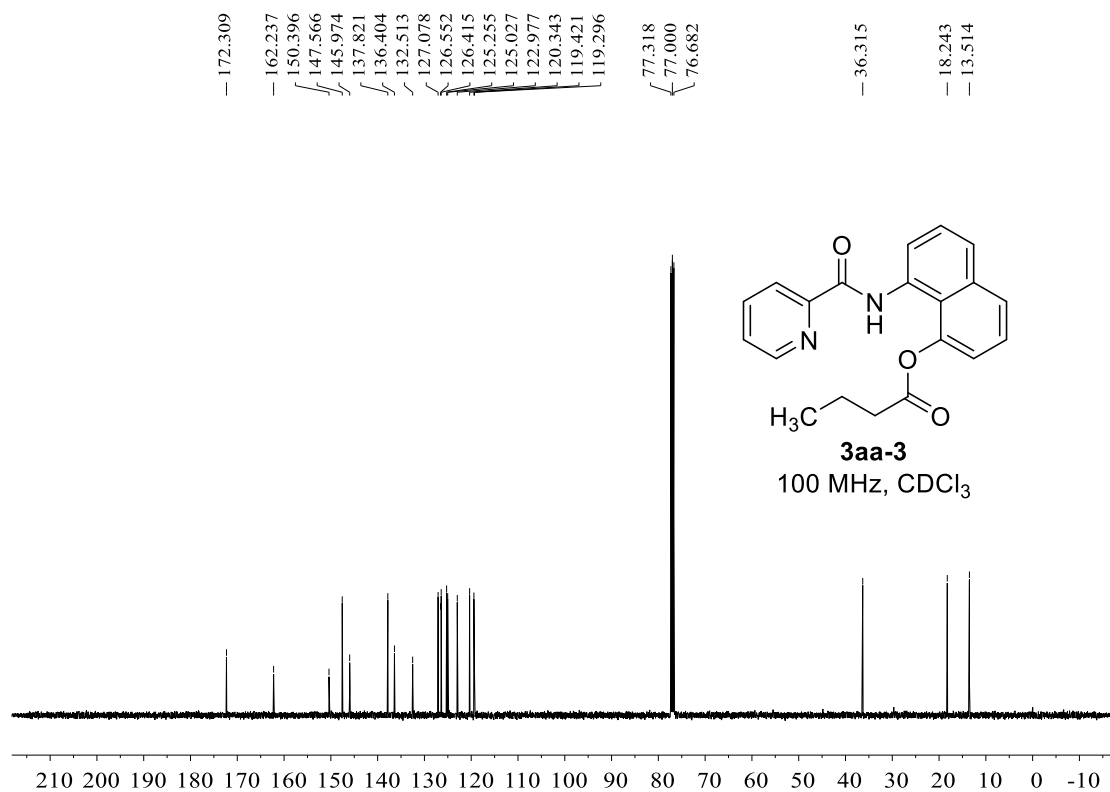

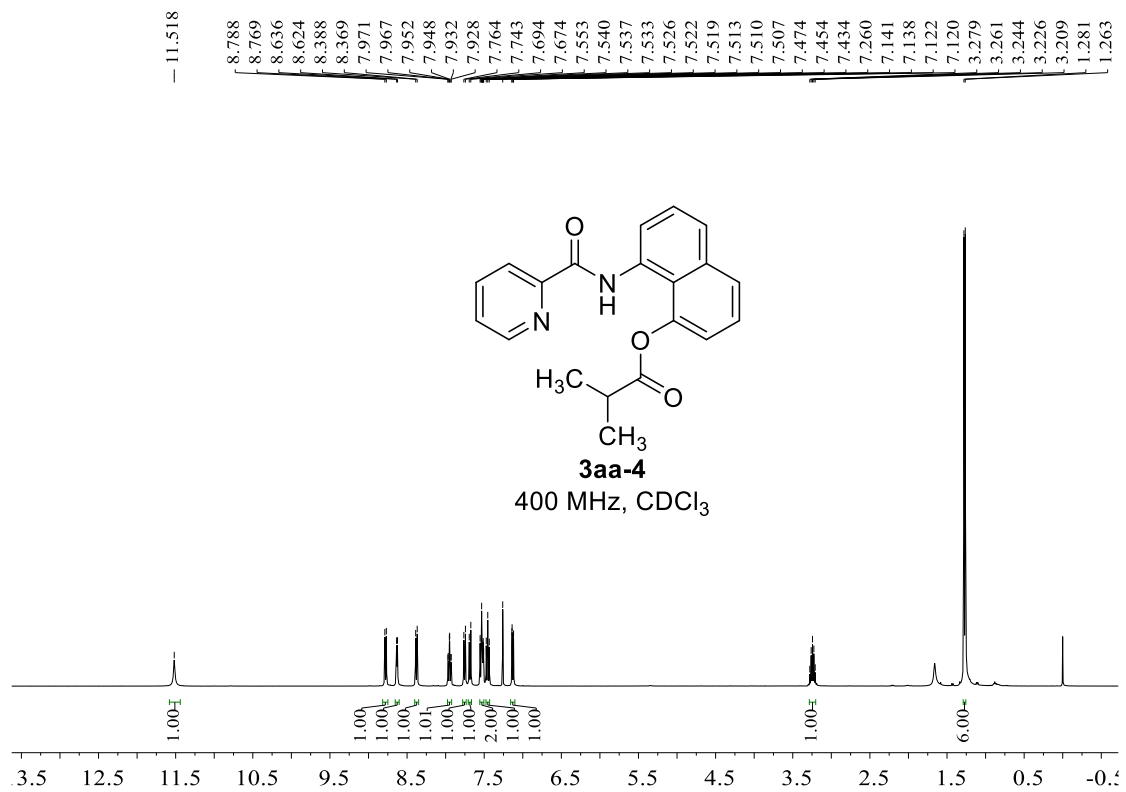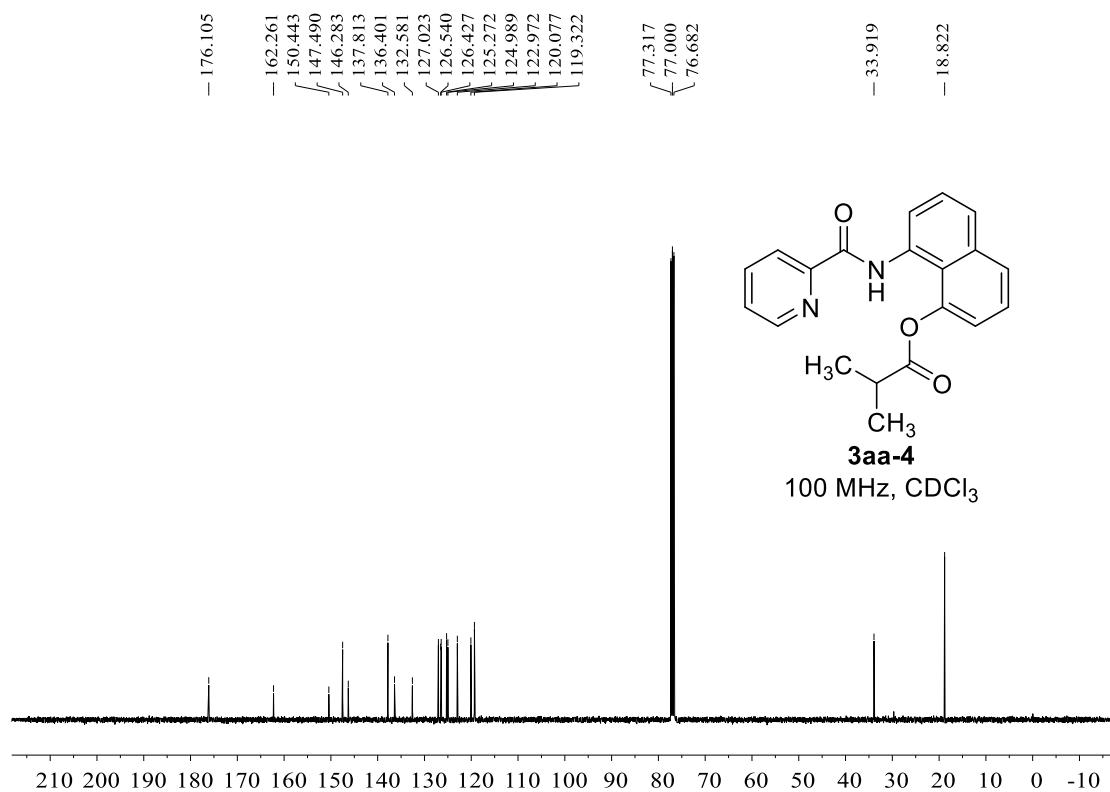

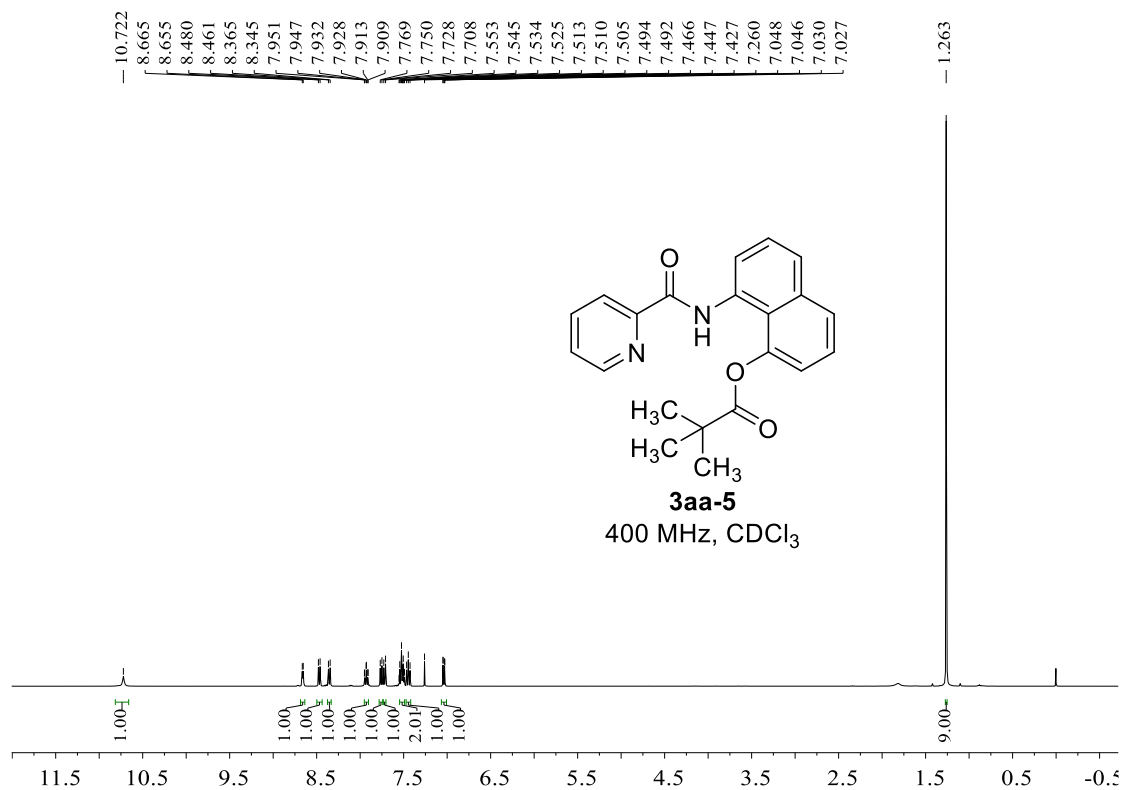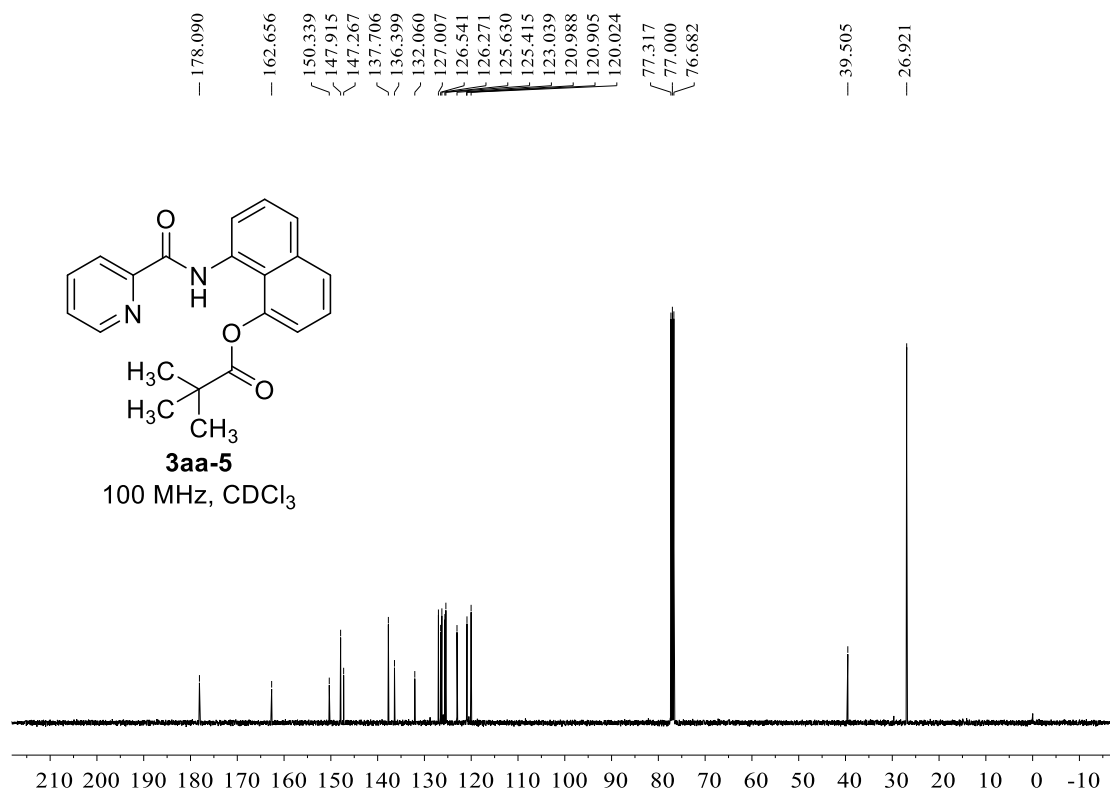



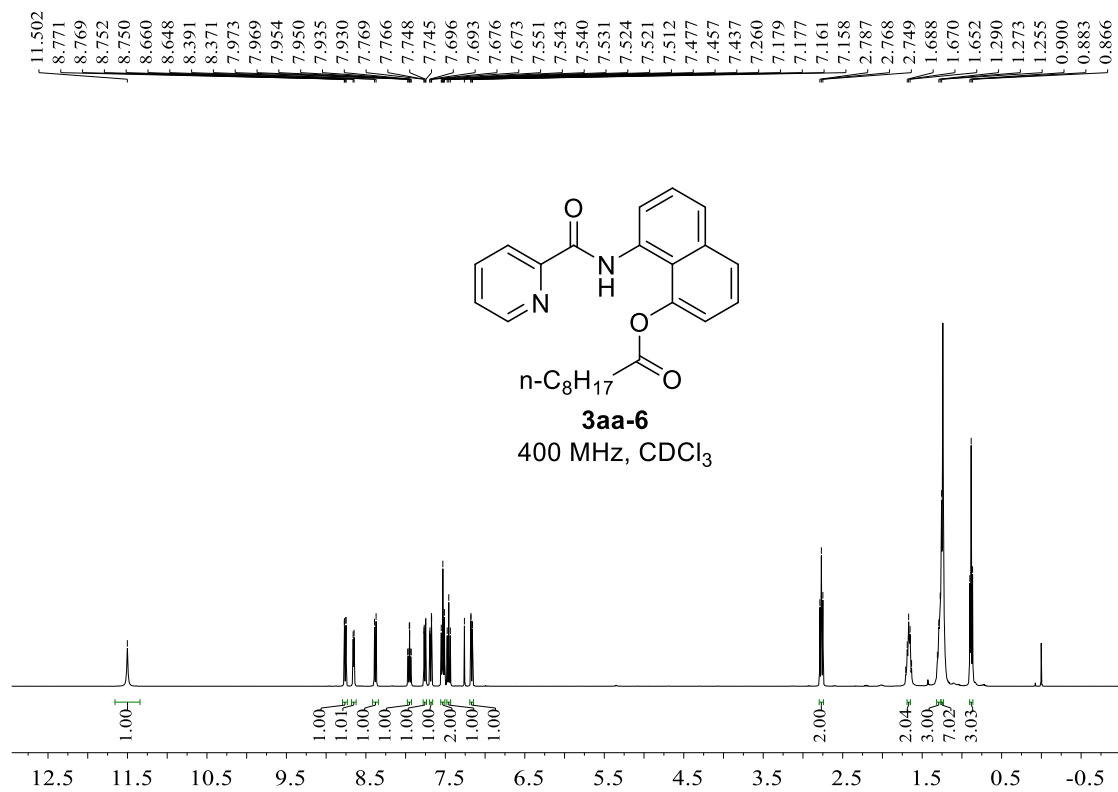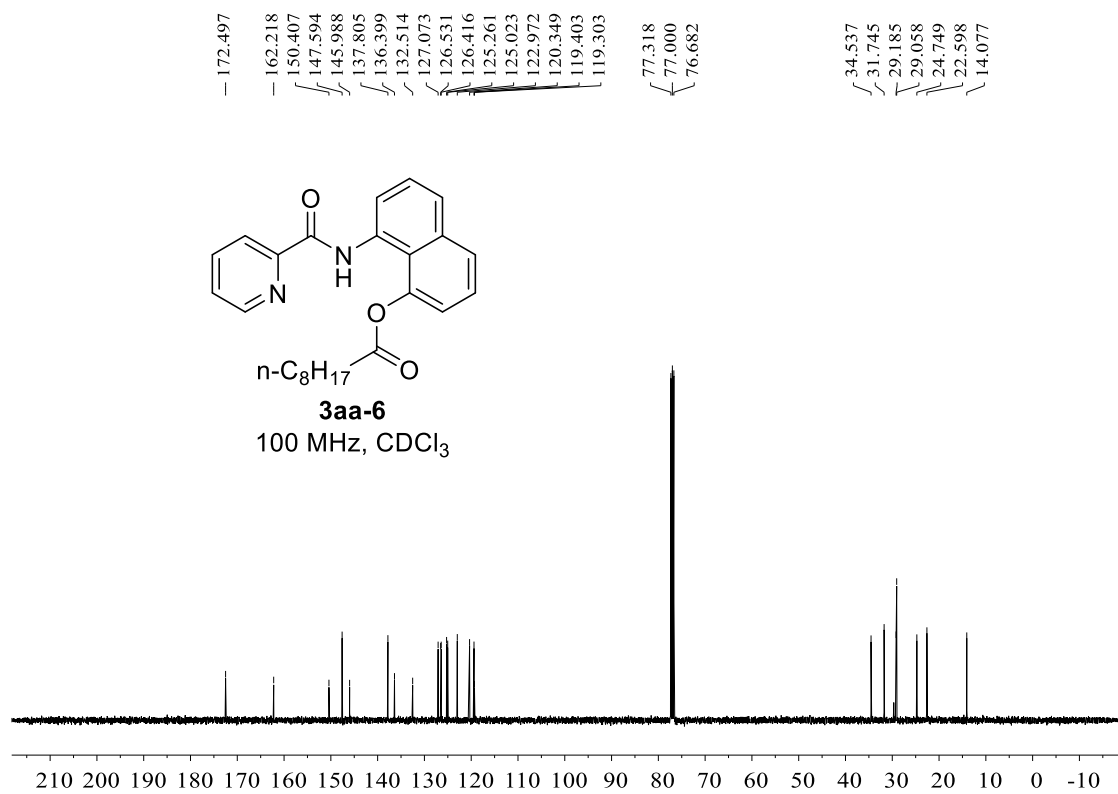

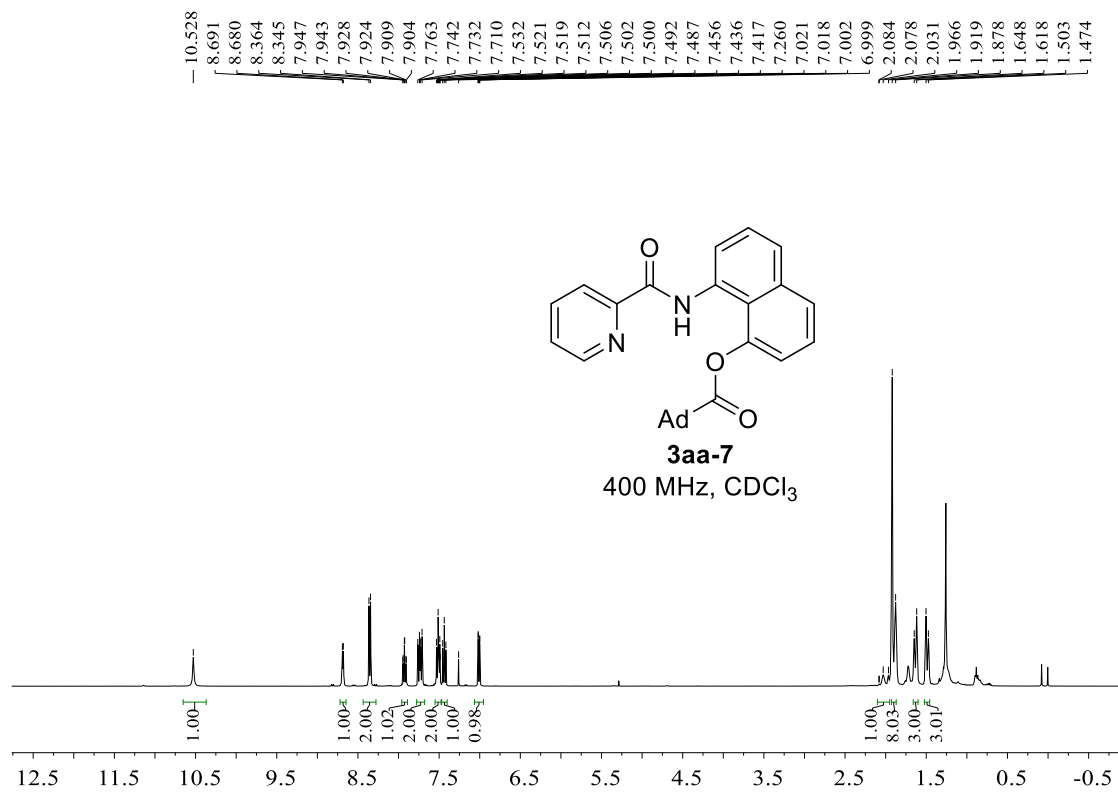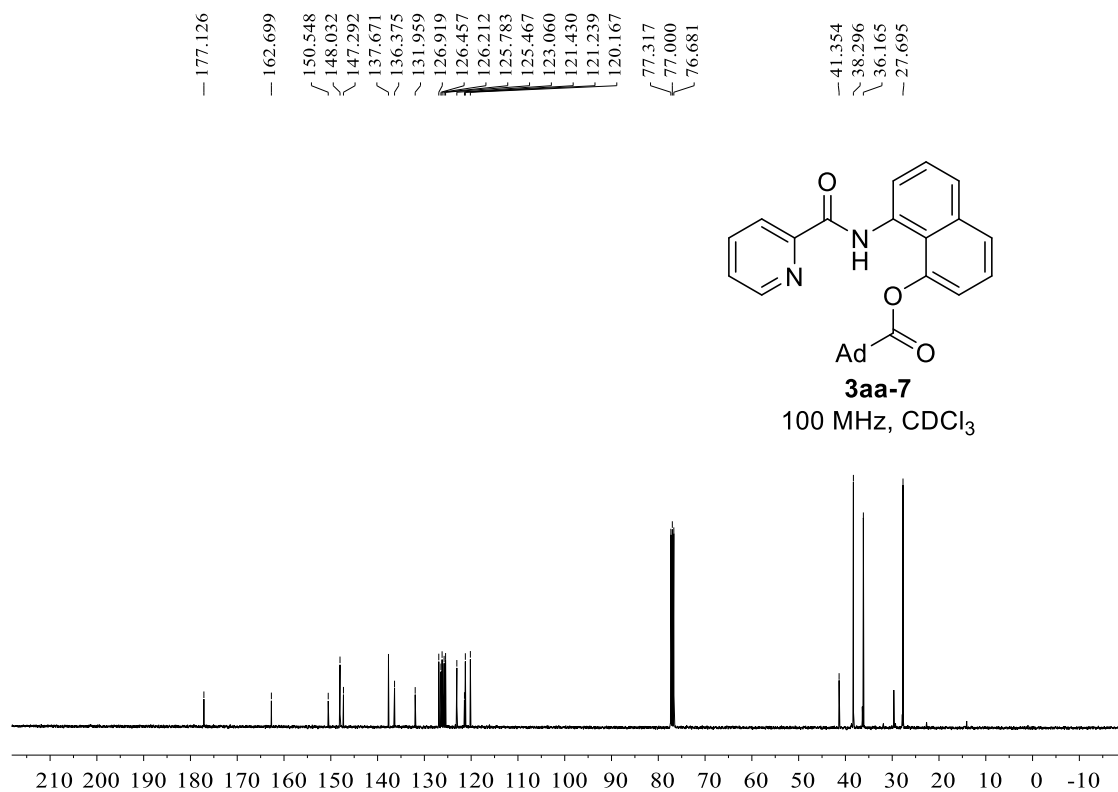



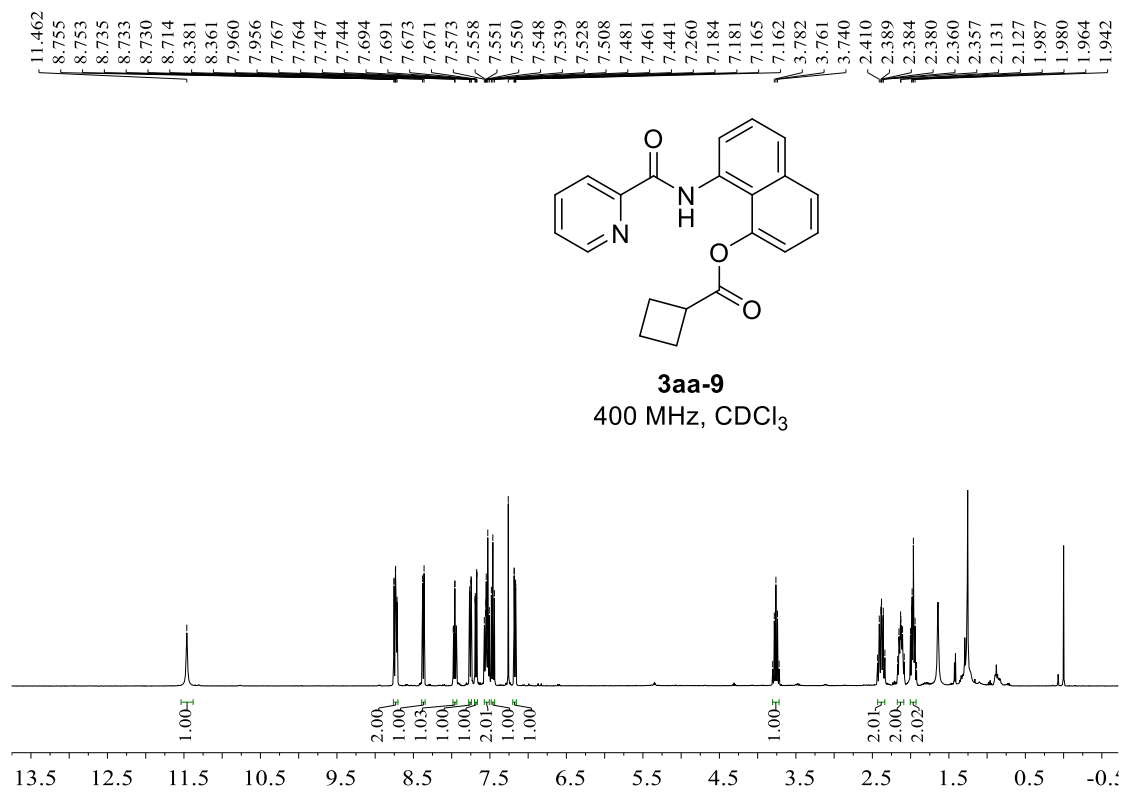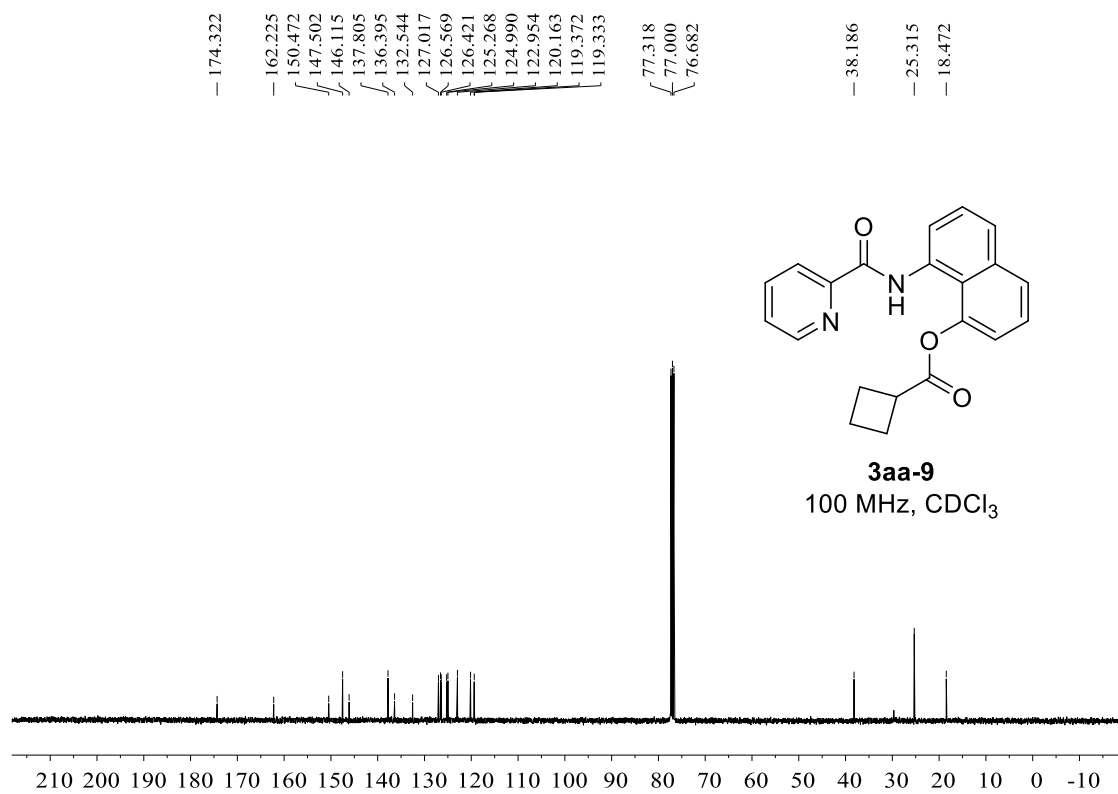





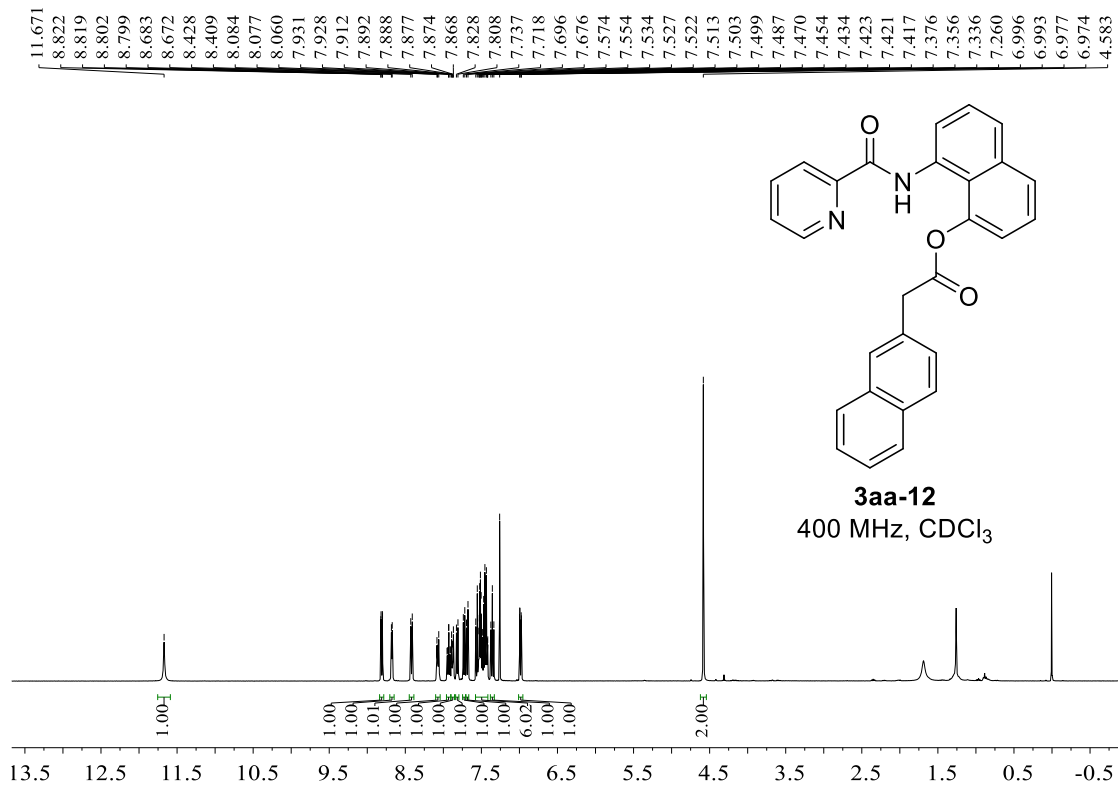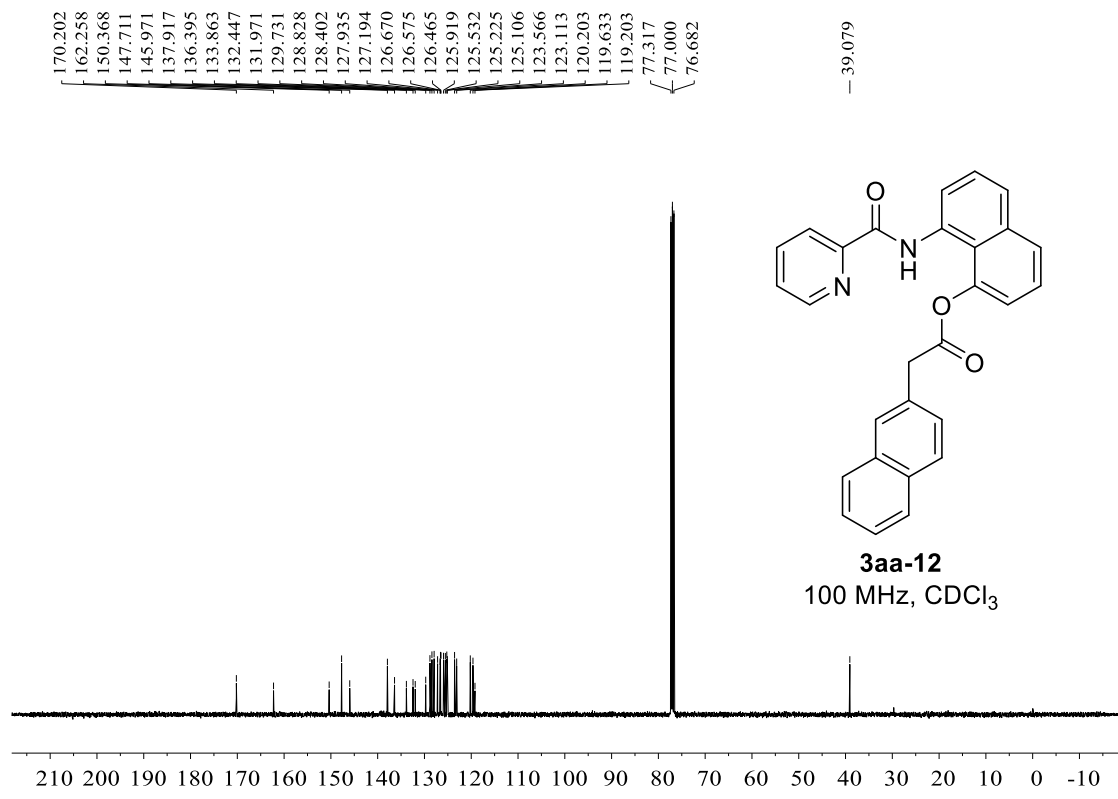

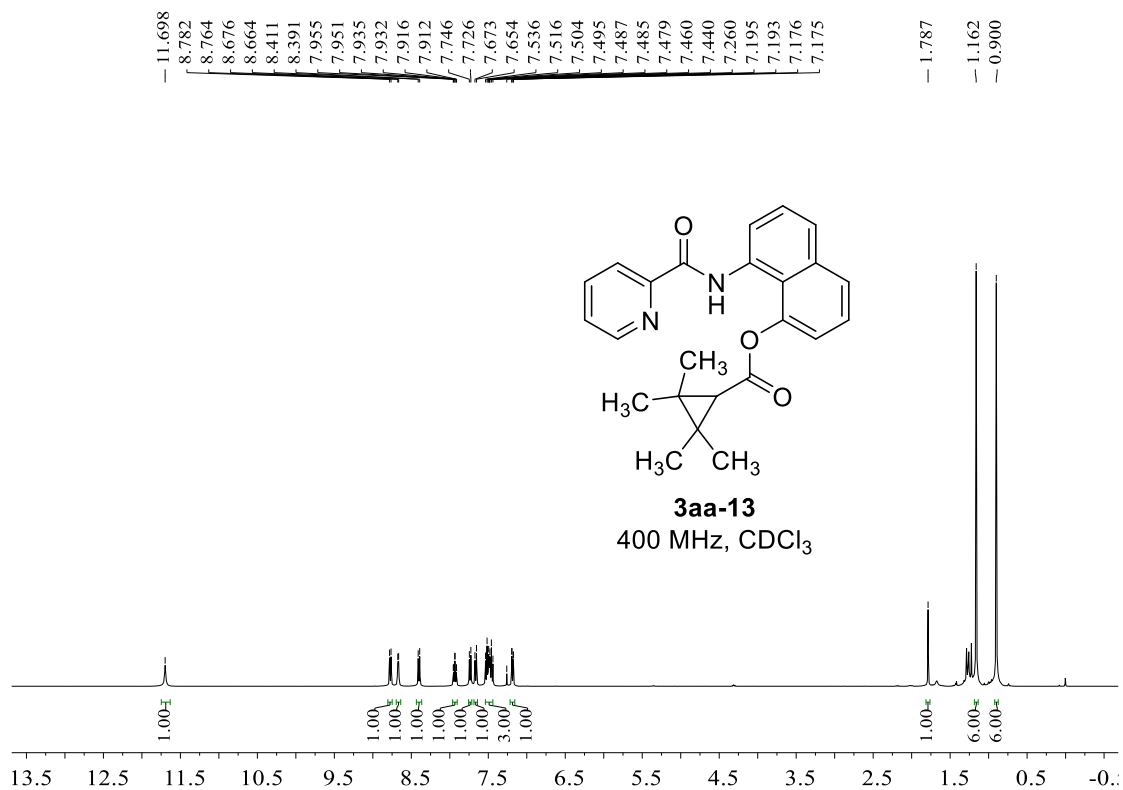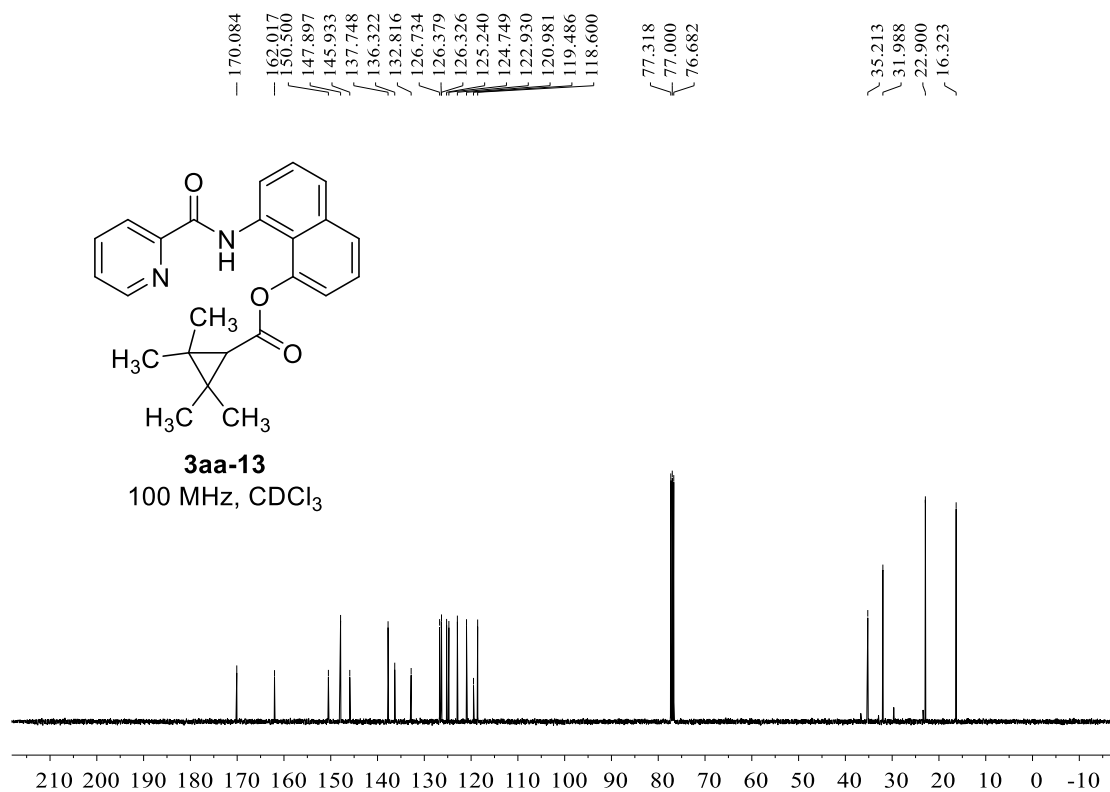



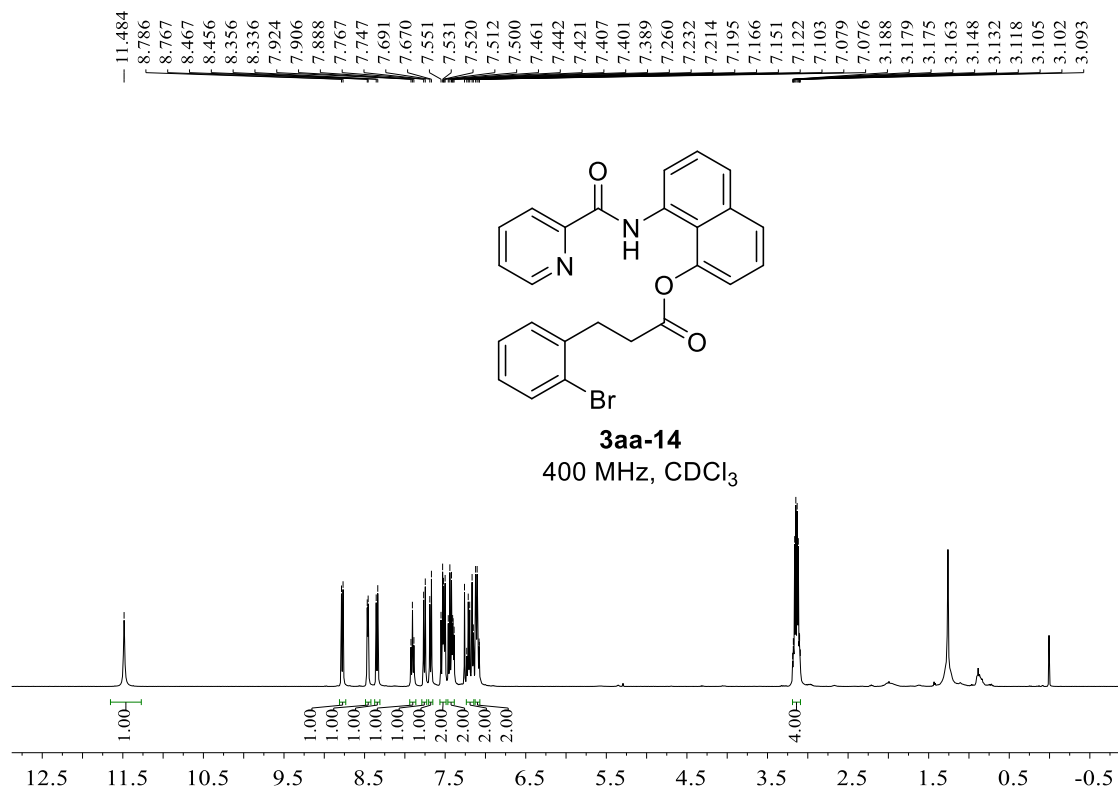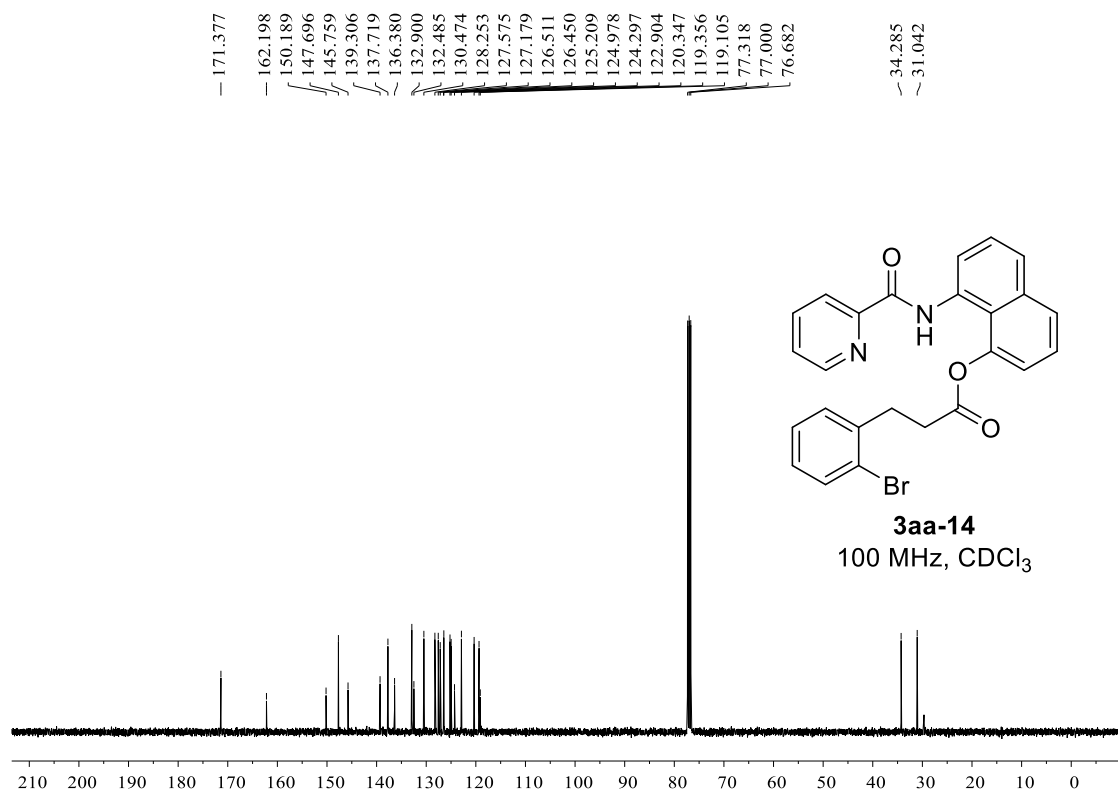

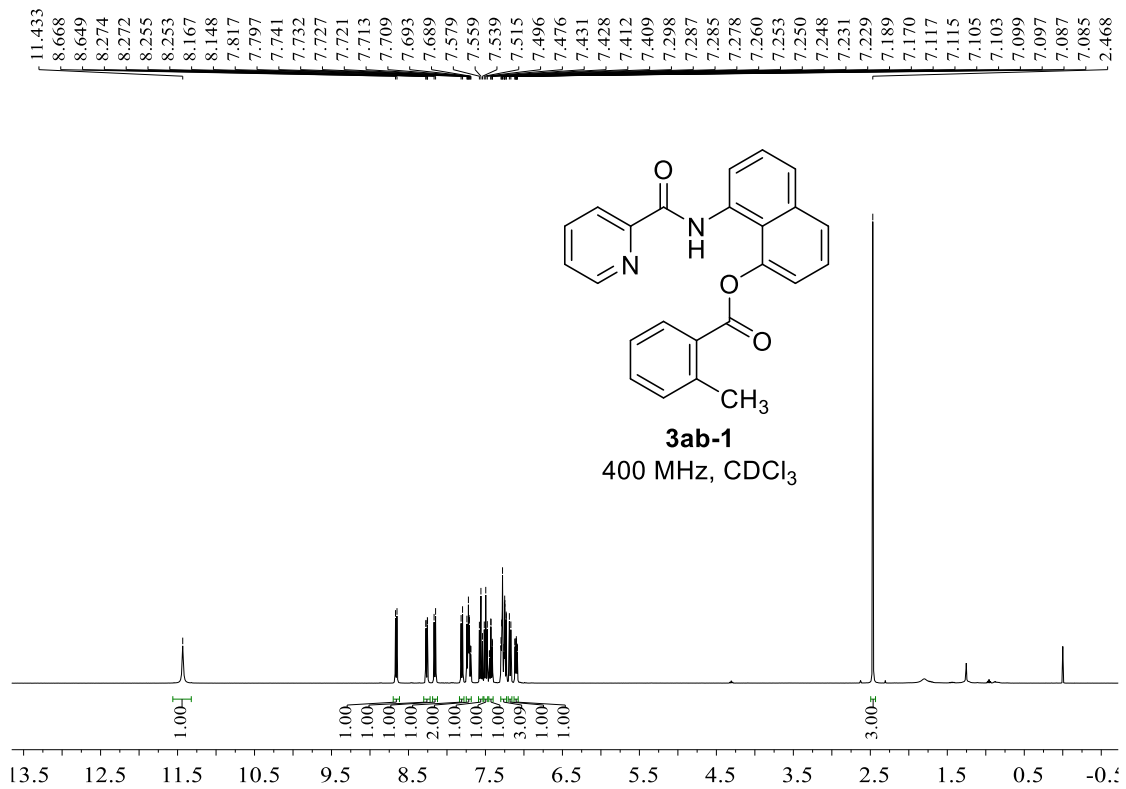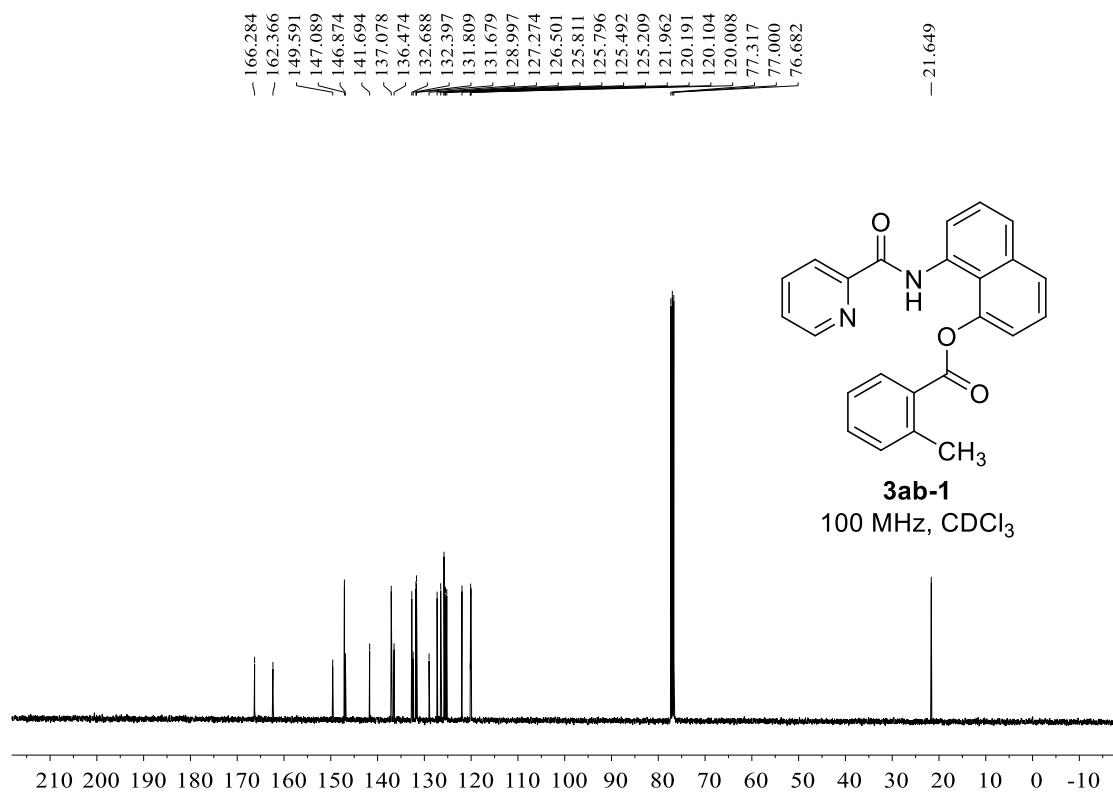

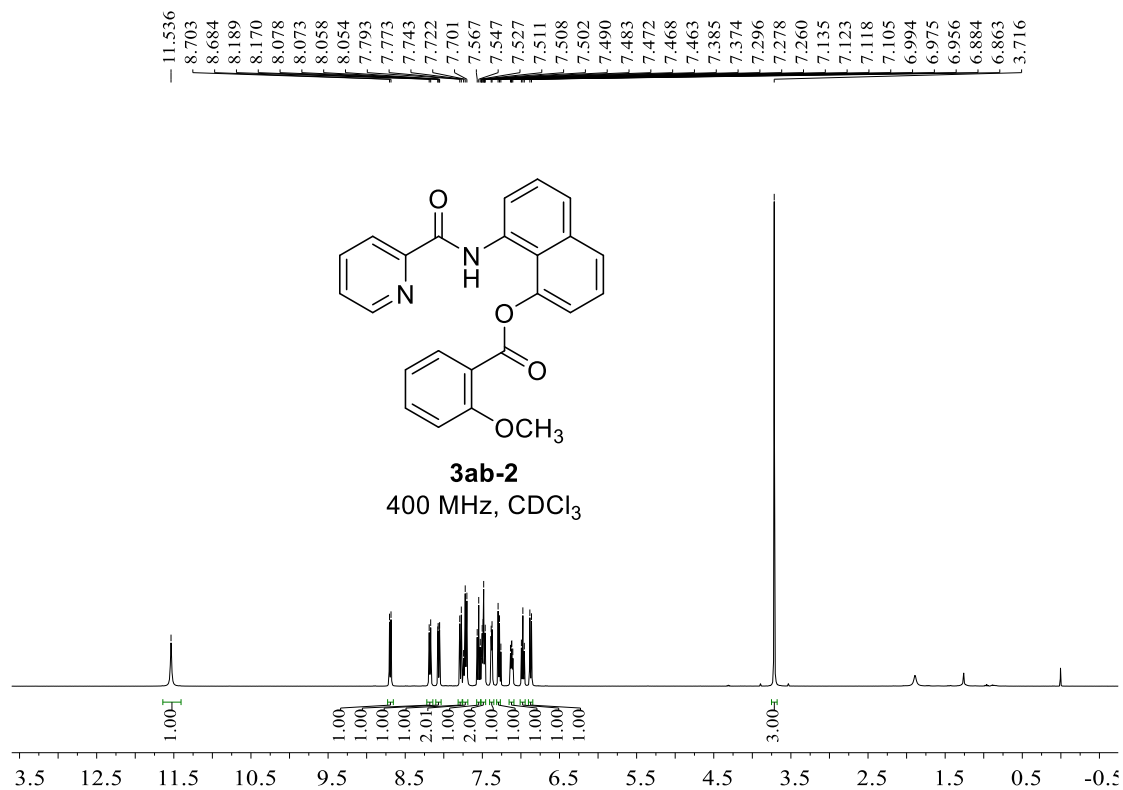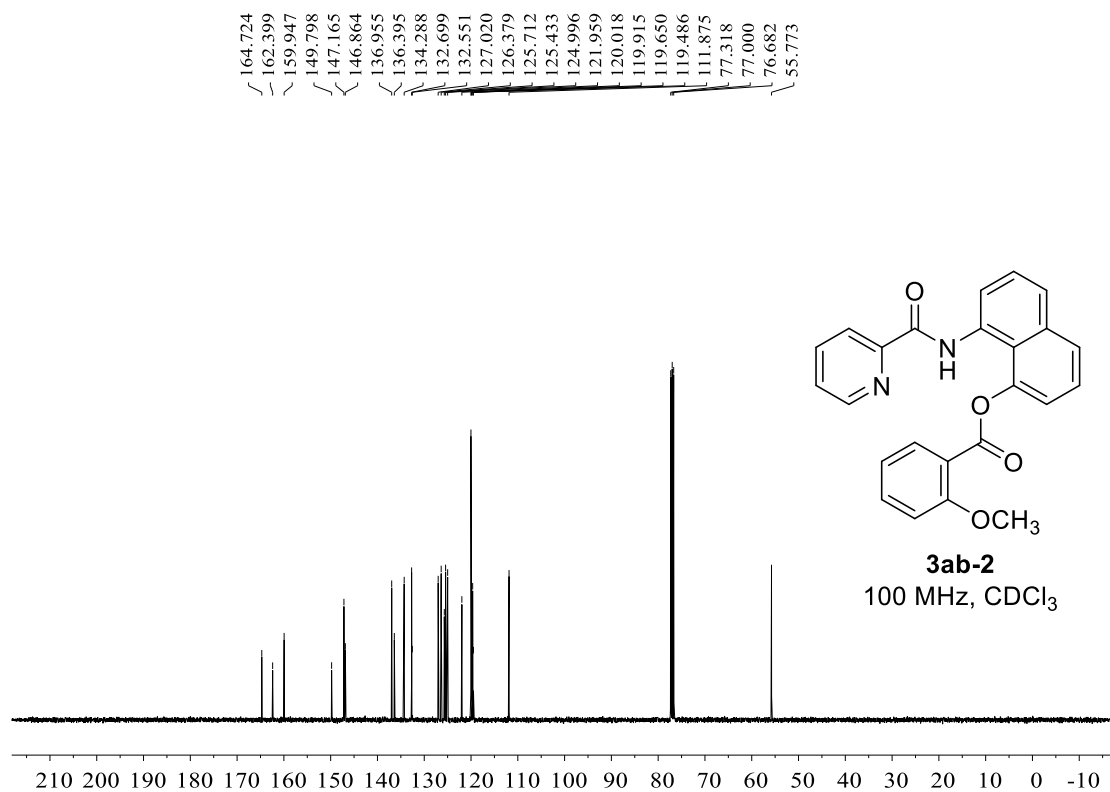

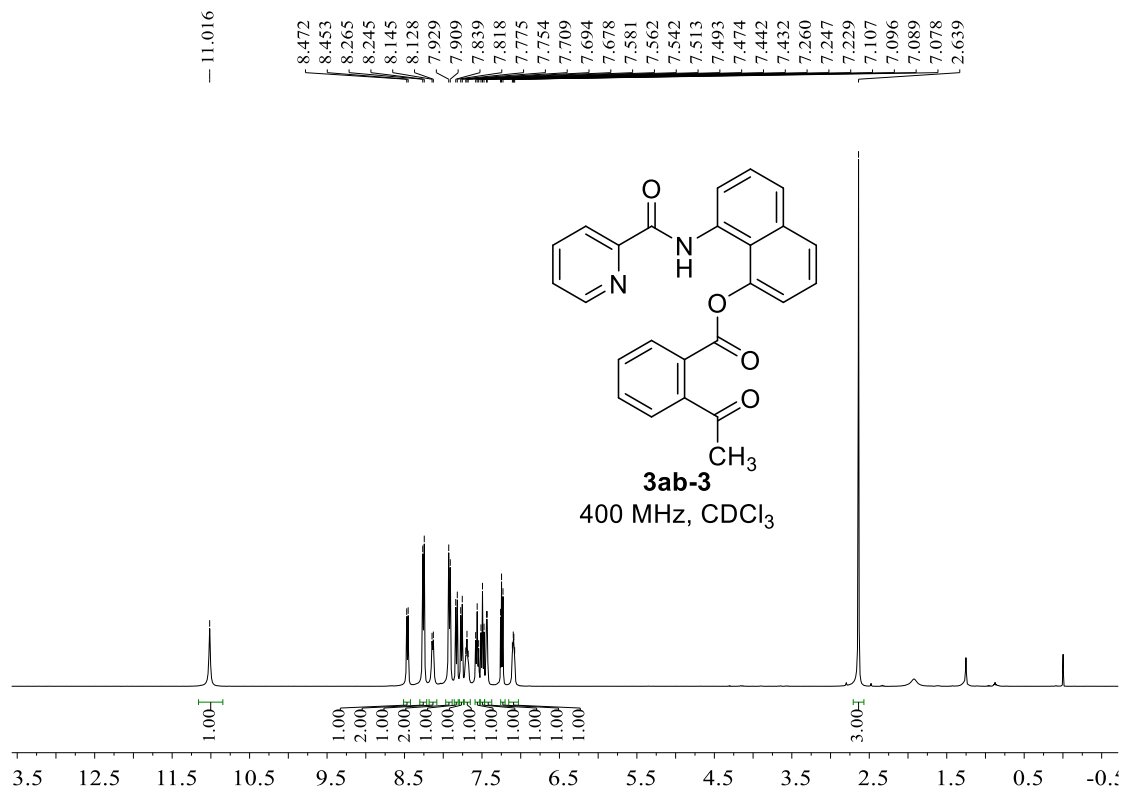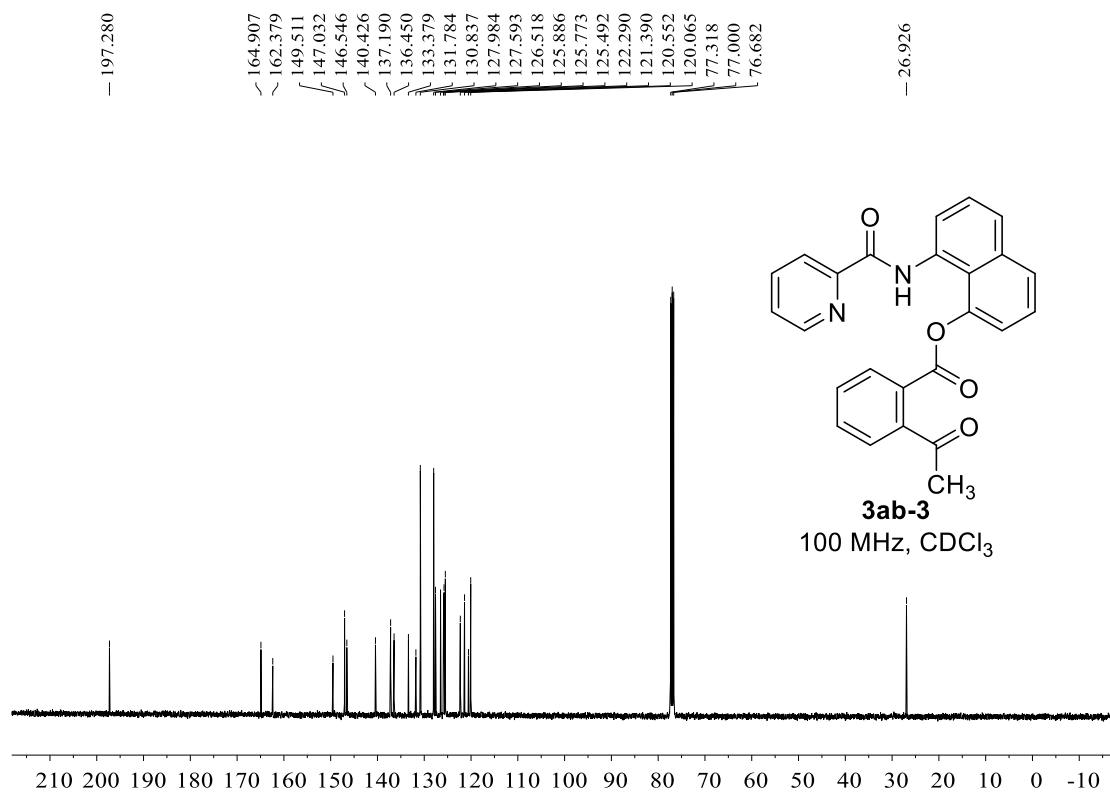



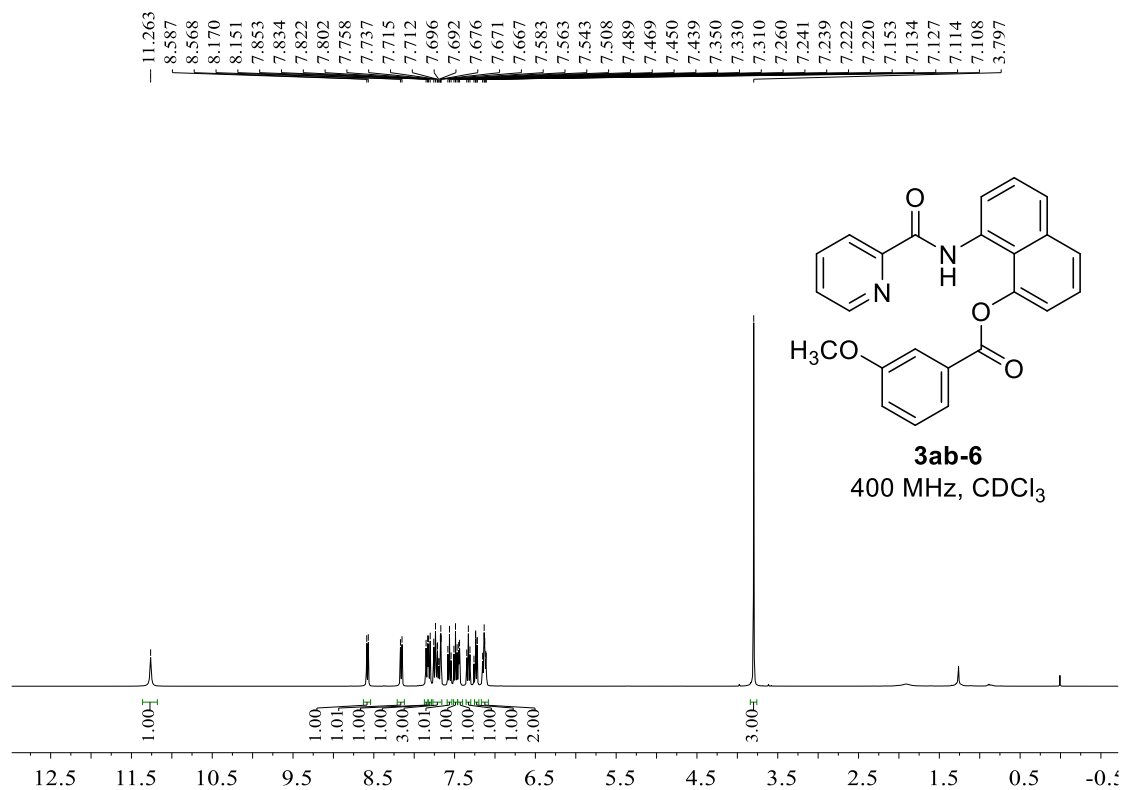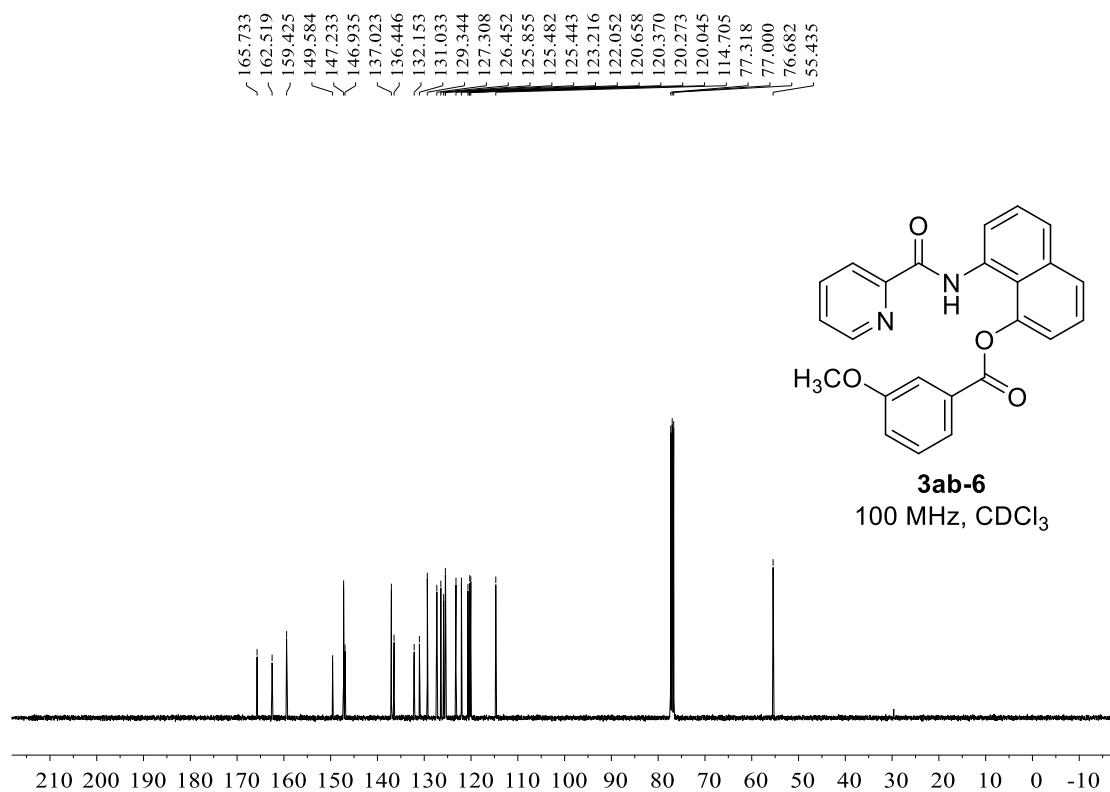

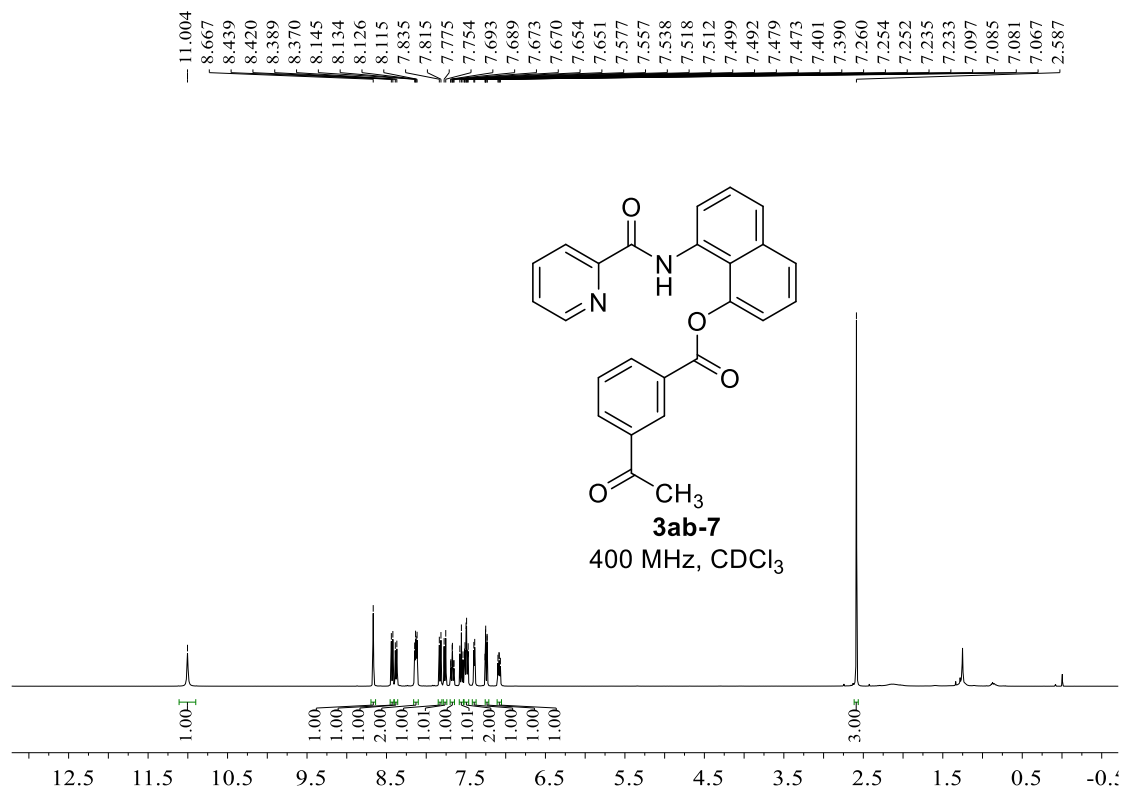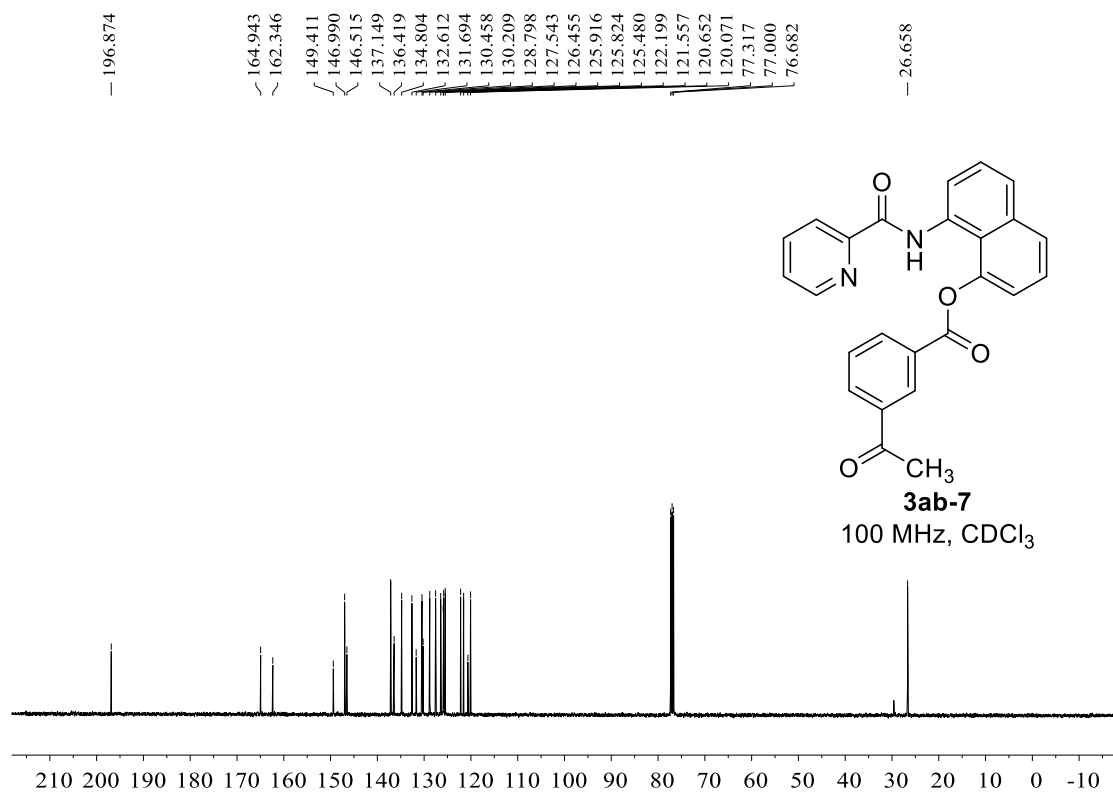

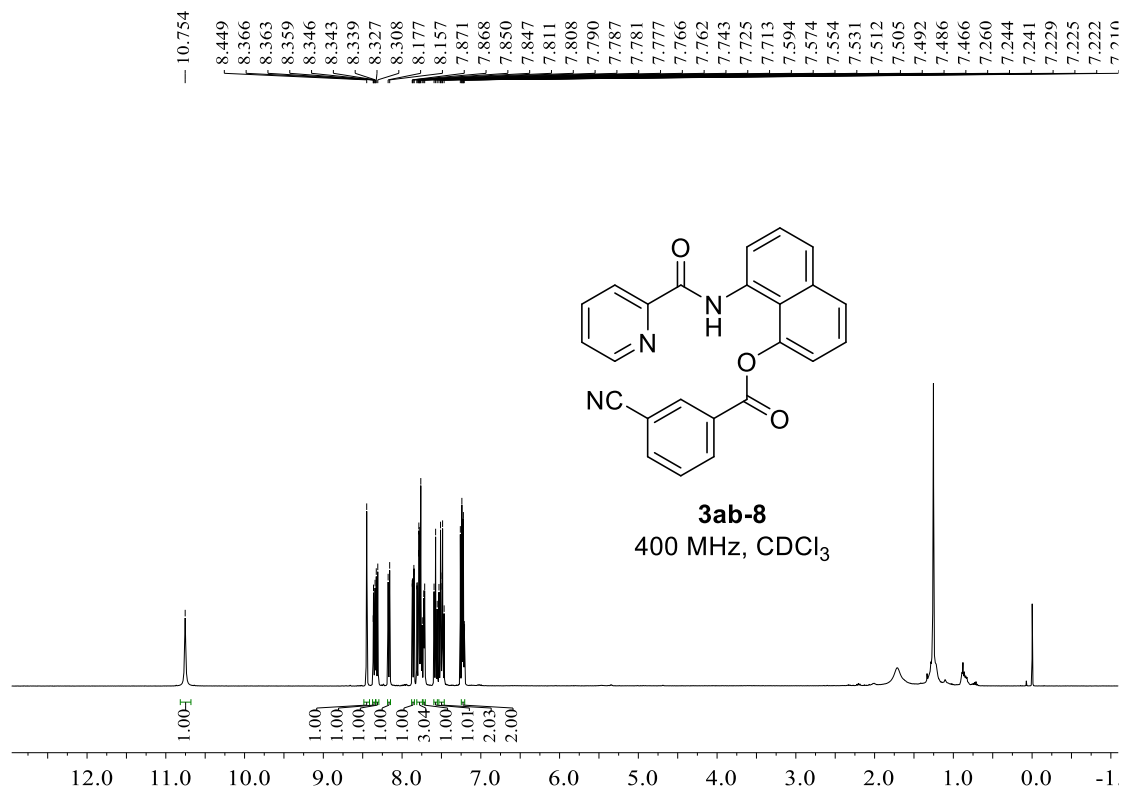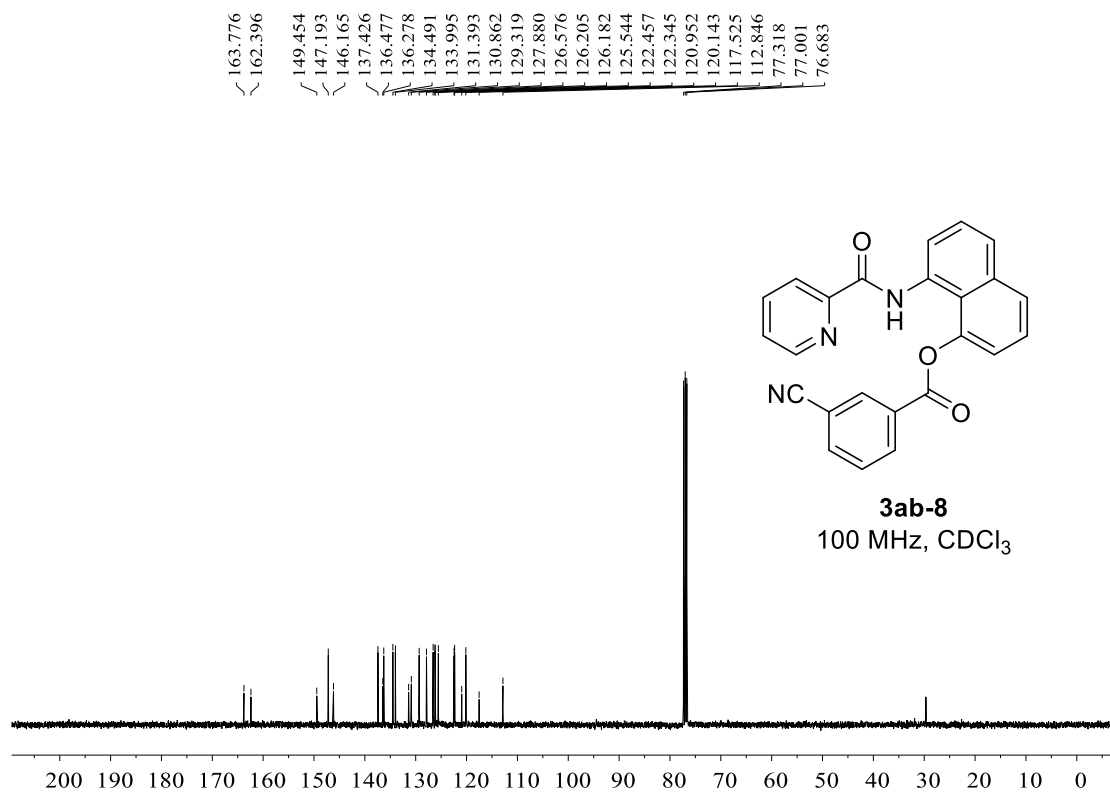





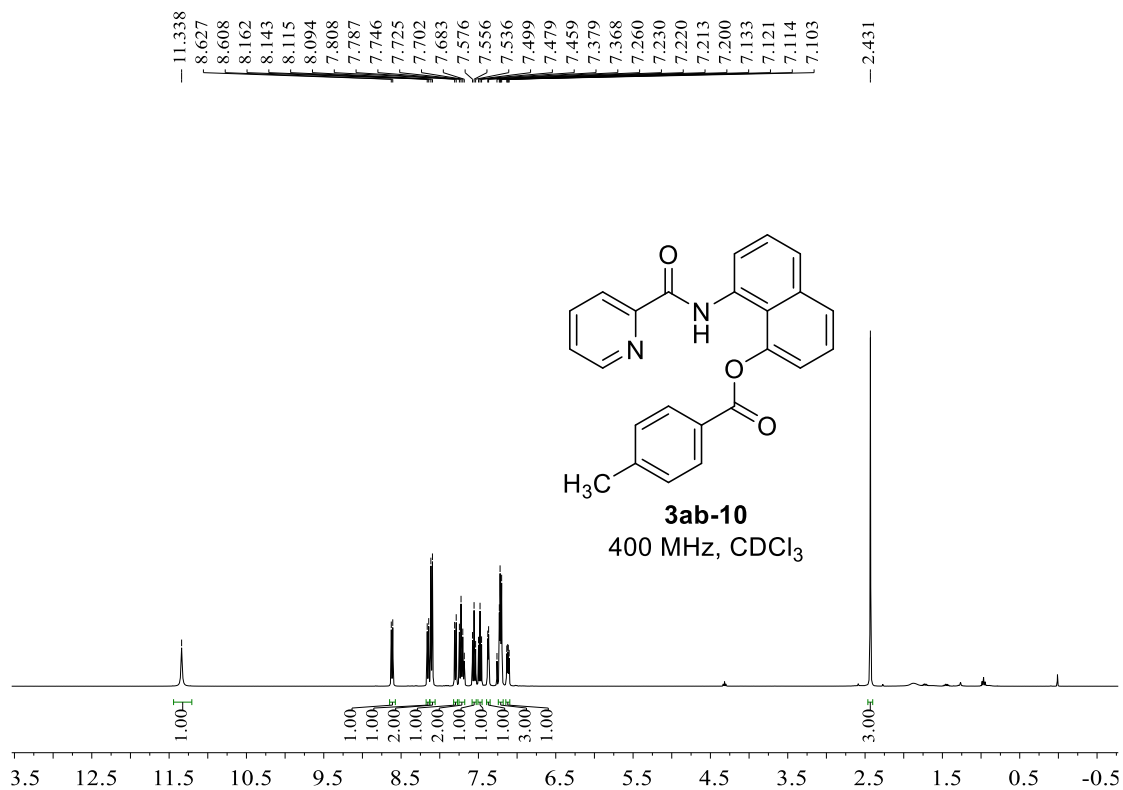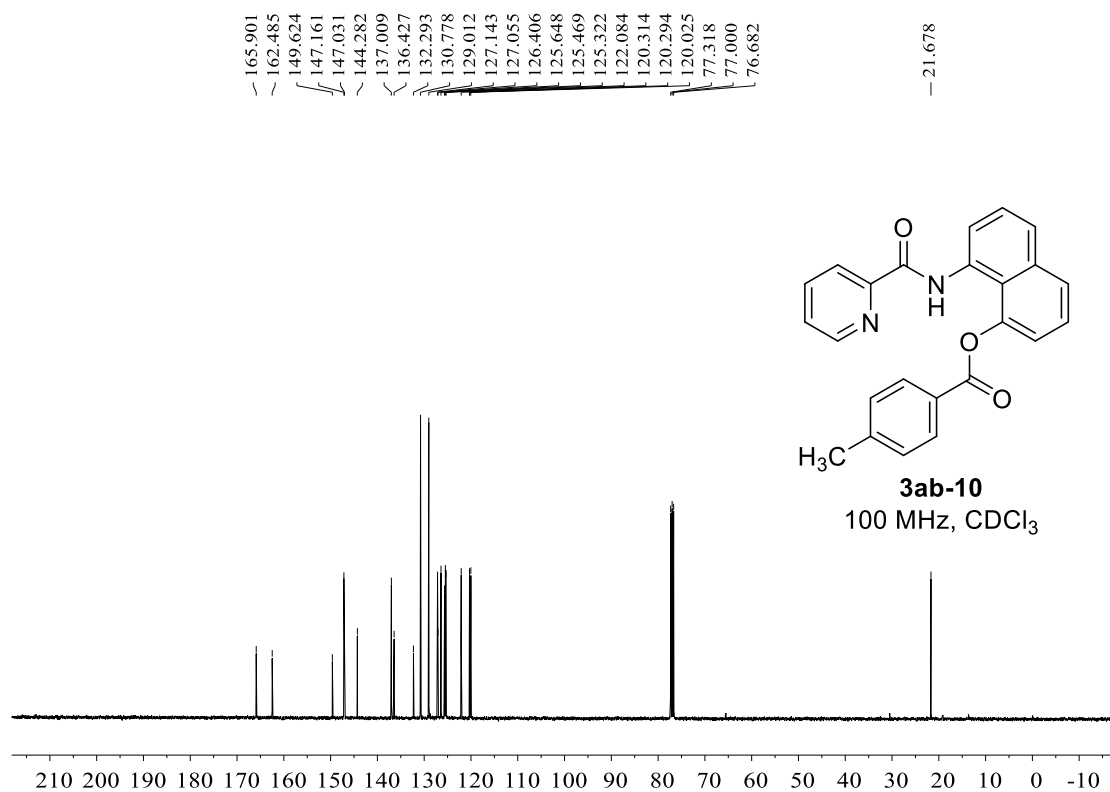

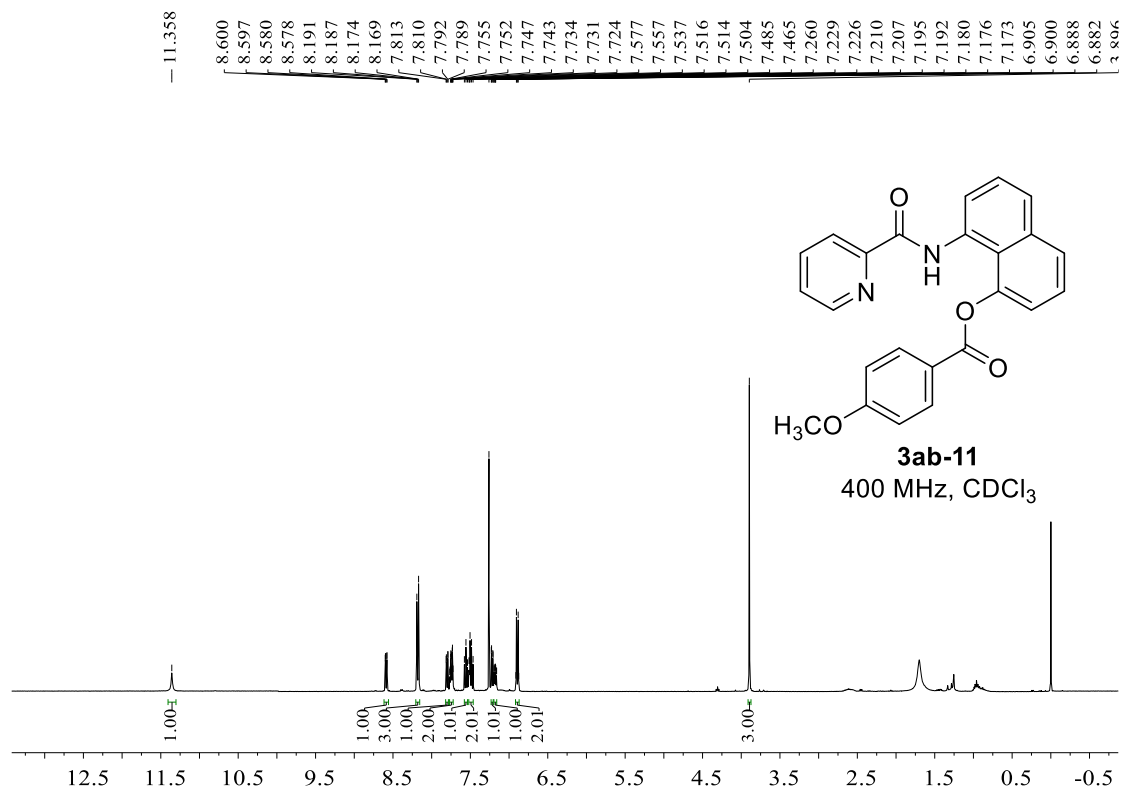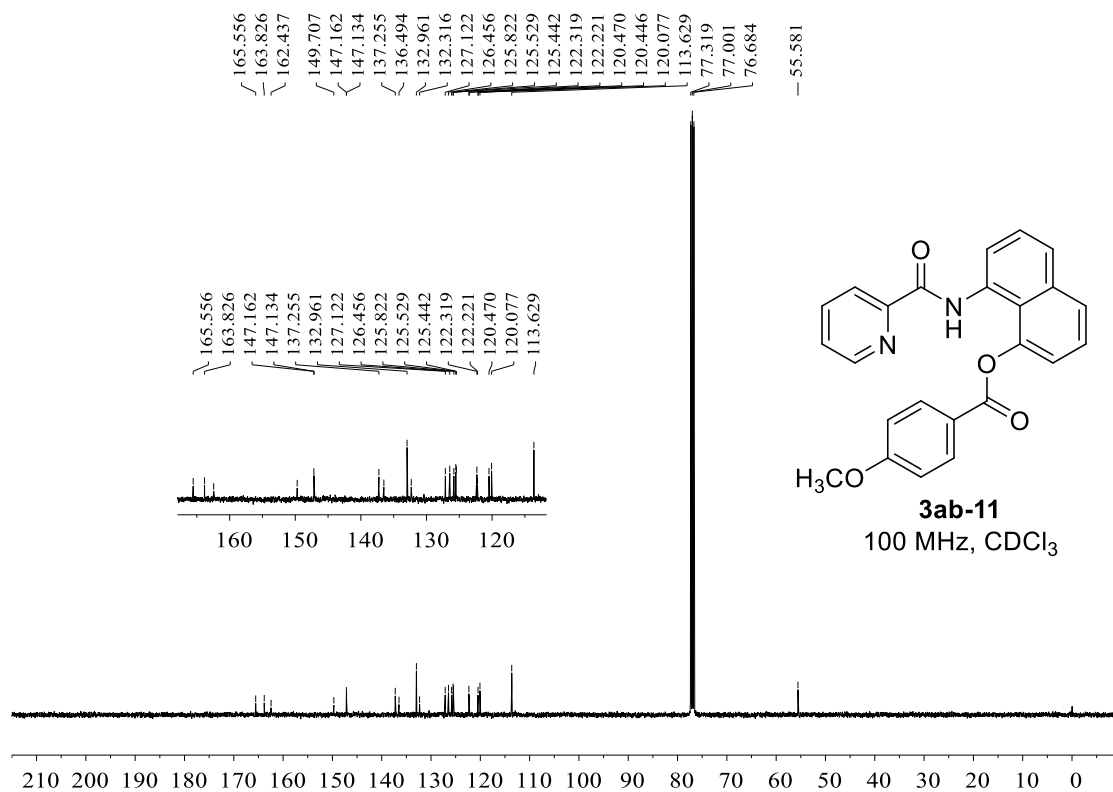

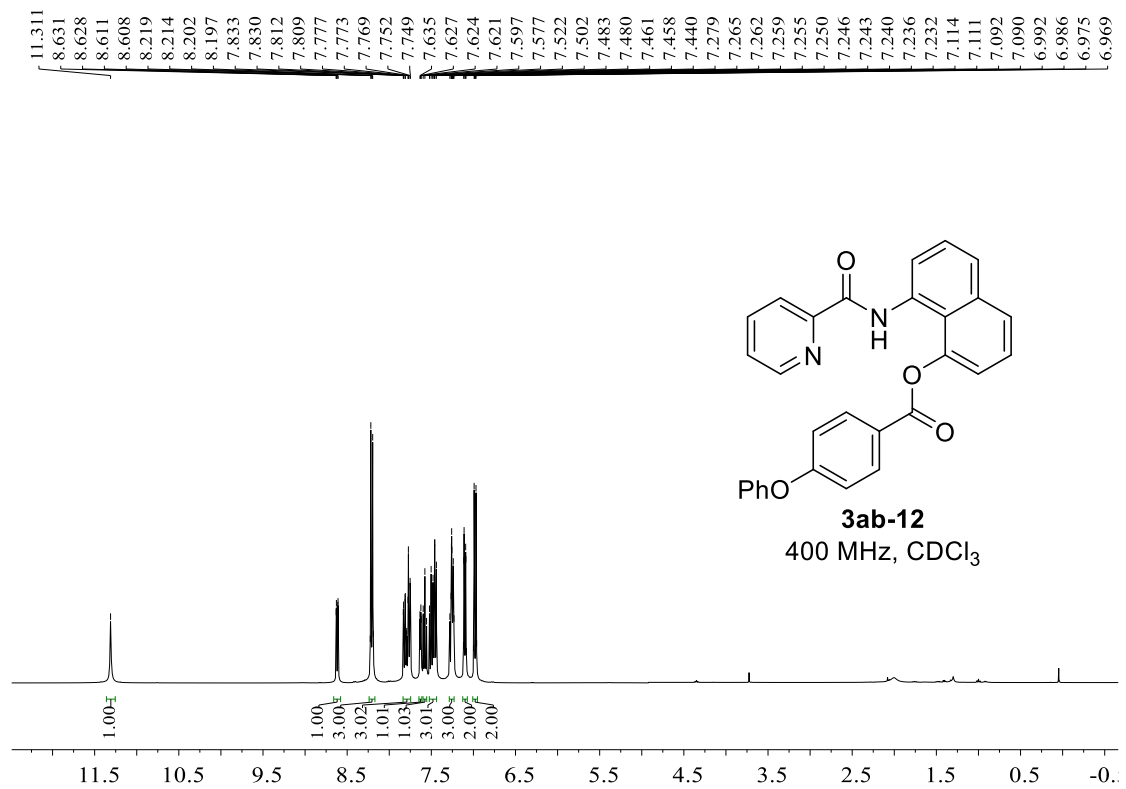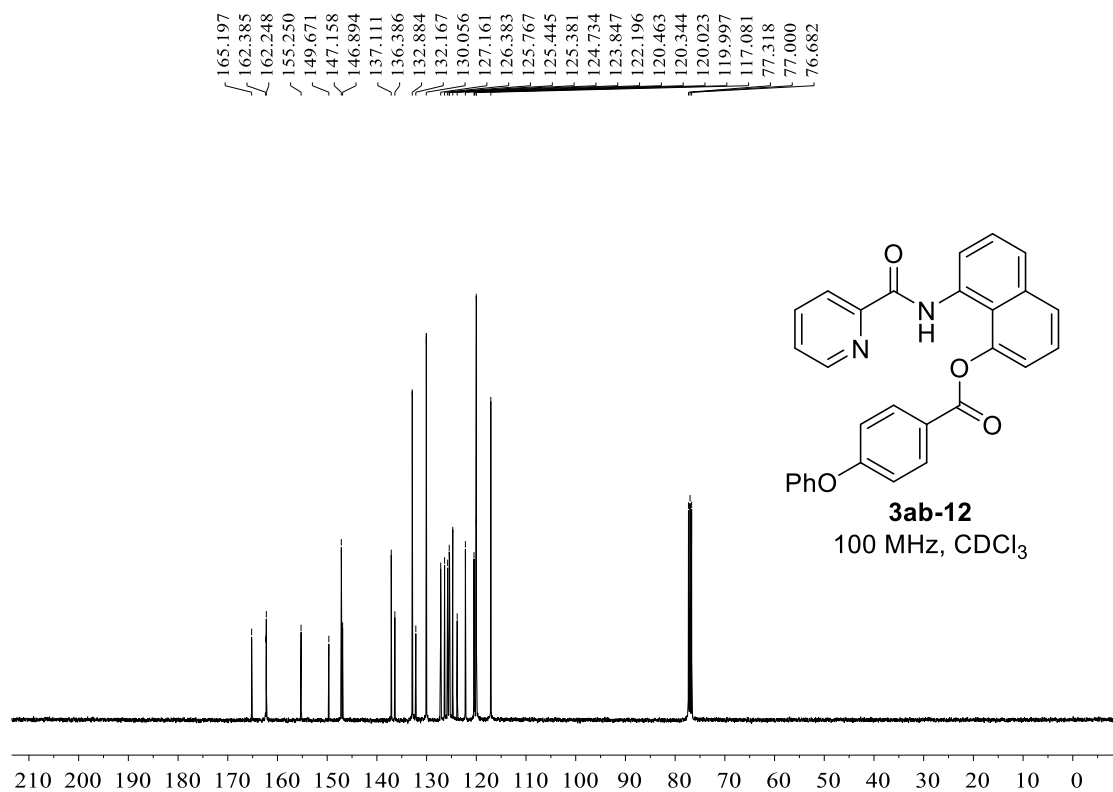



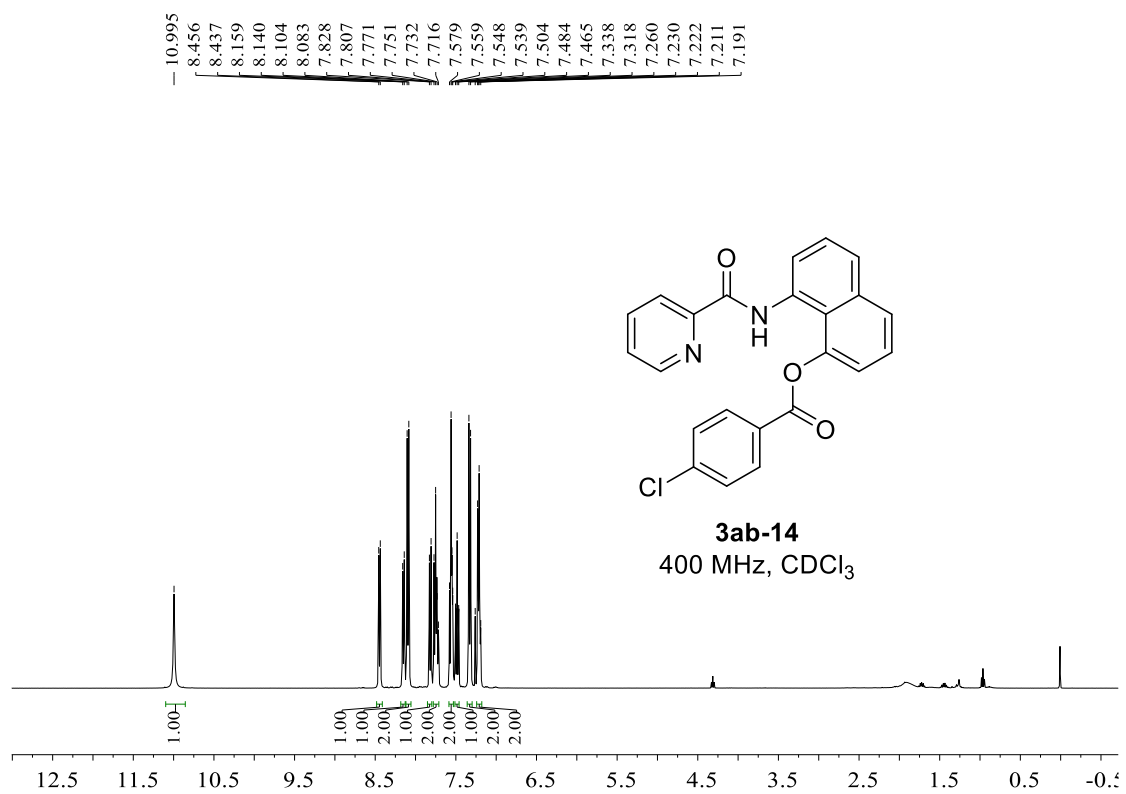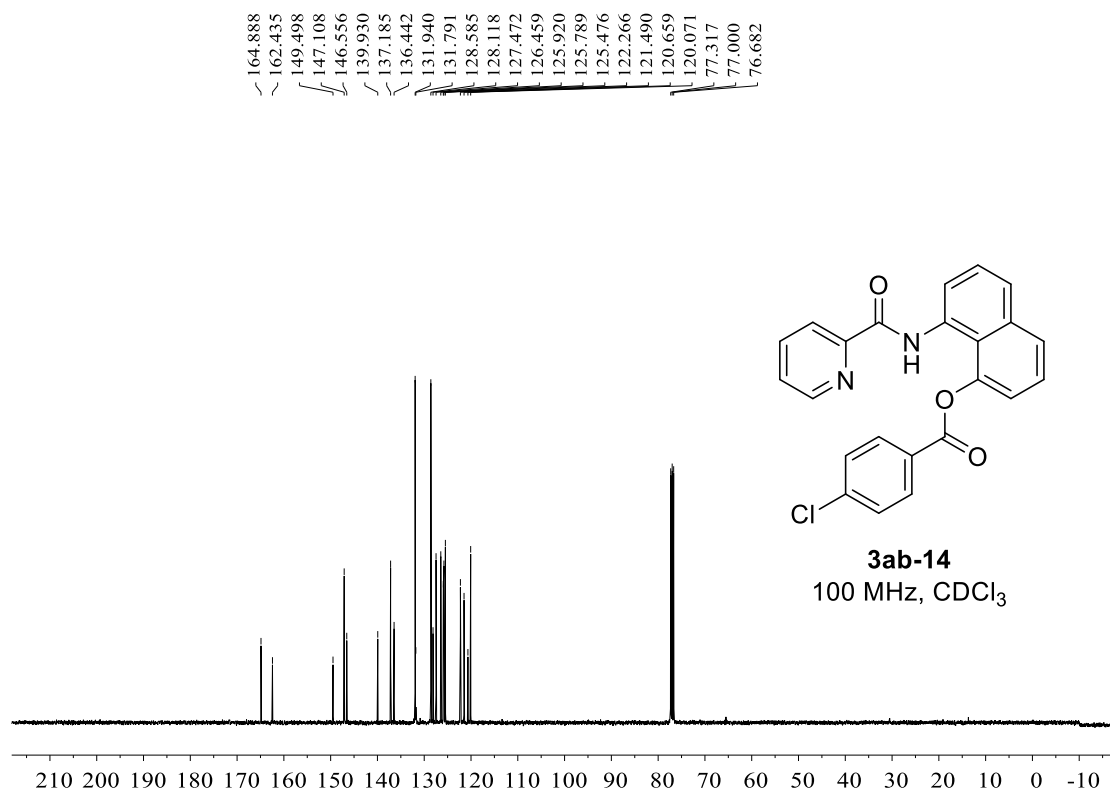



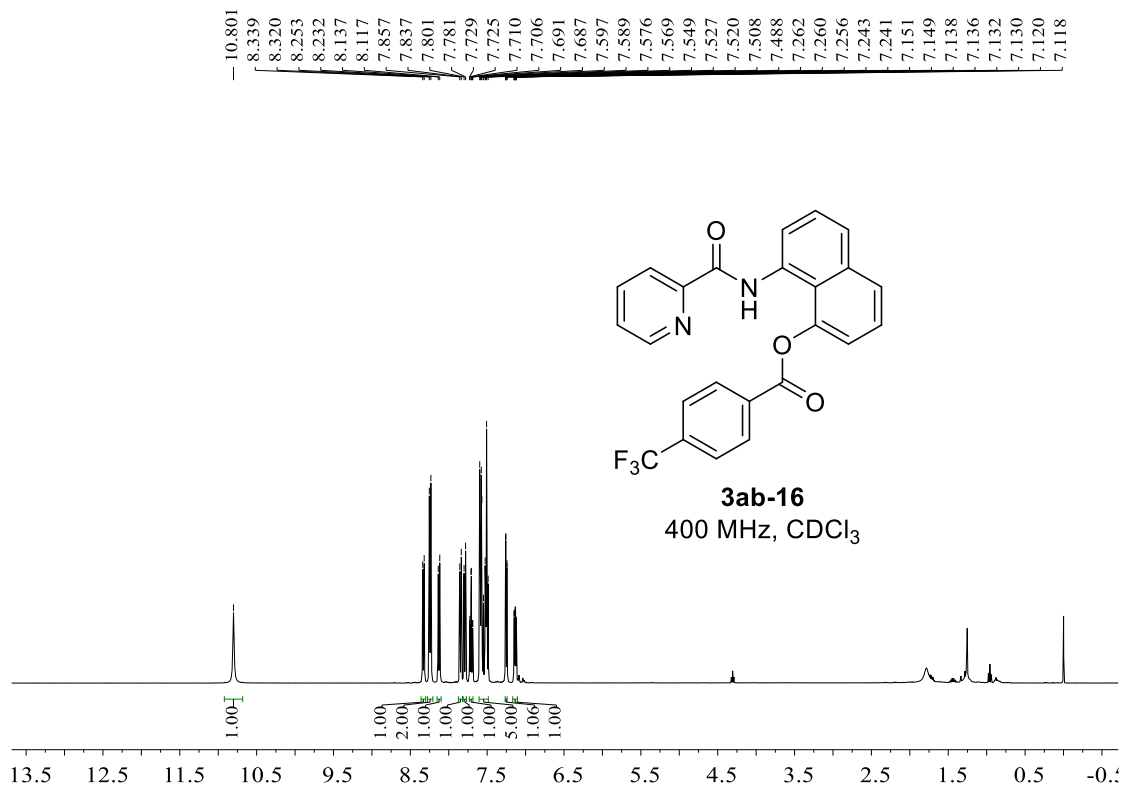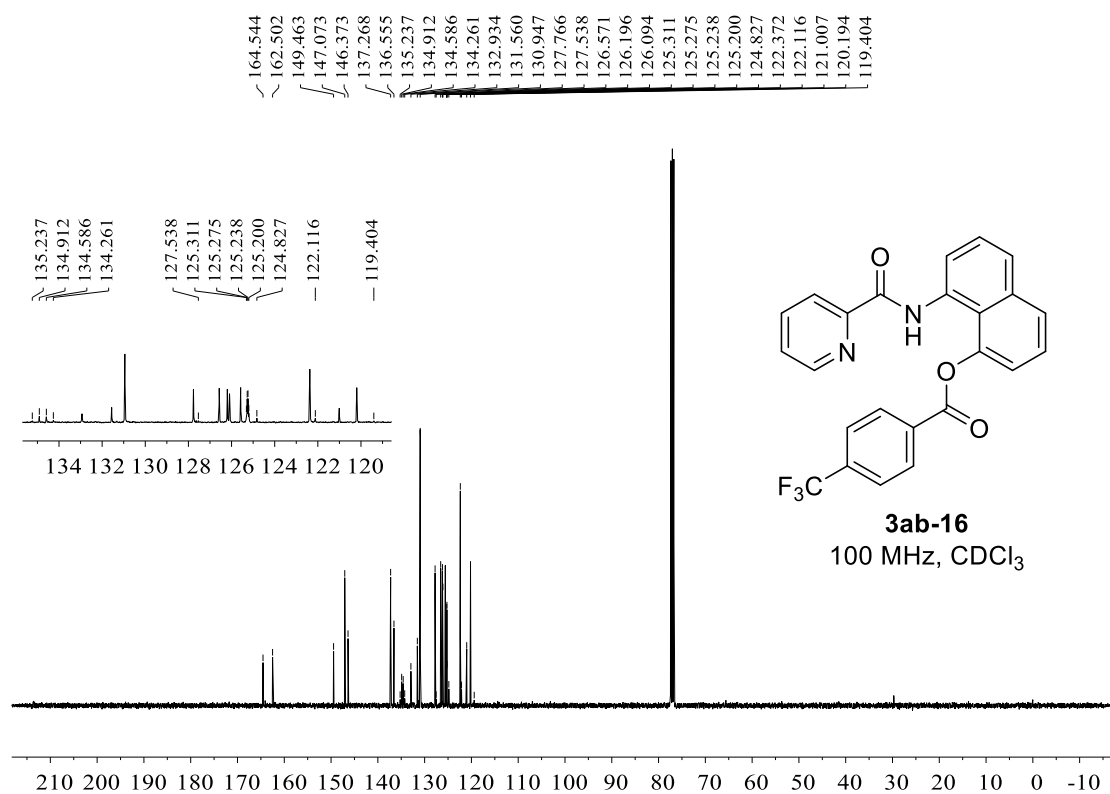



— -63.229

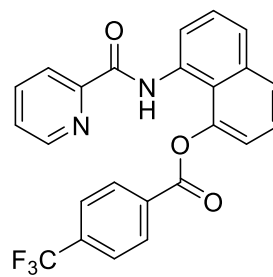

**3ab-16**  
376 MHz, CDCl<sub>3</sub>

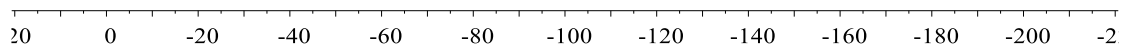



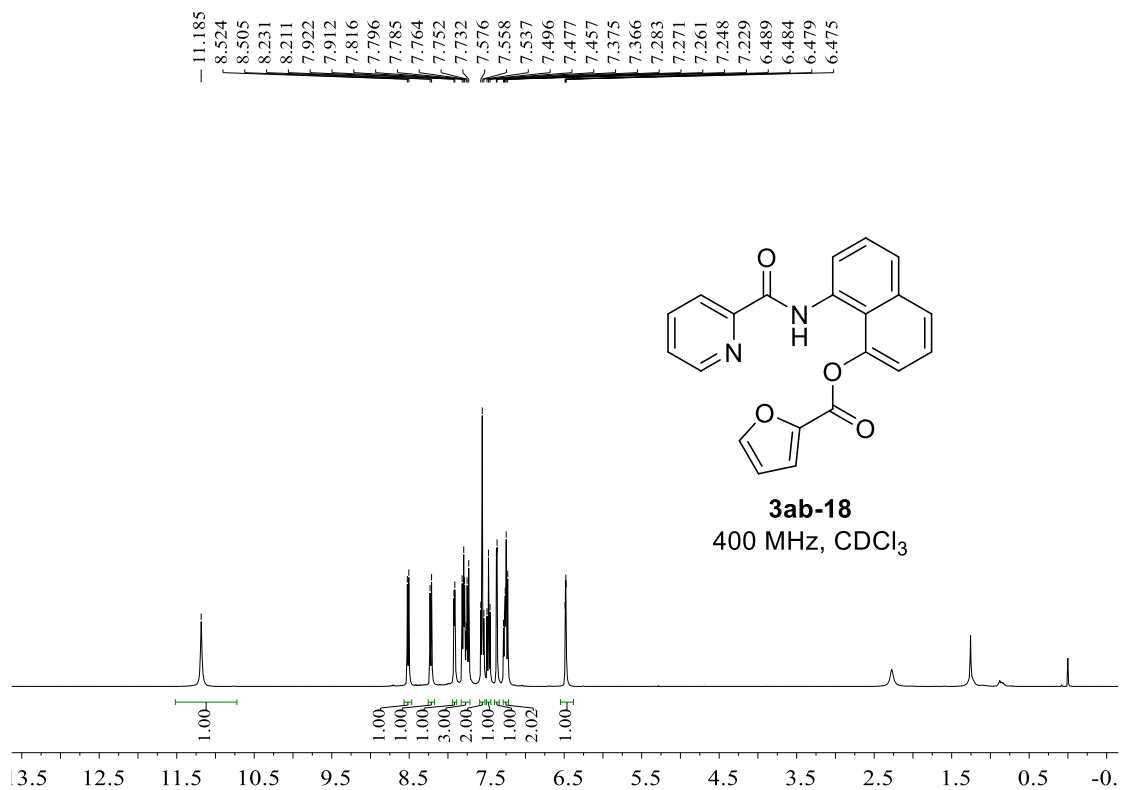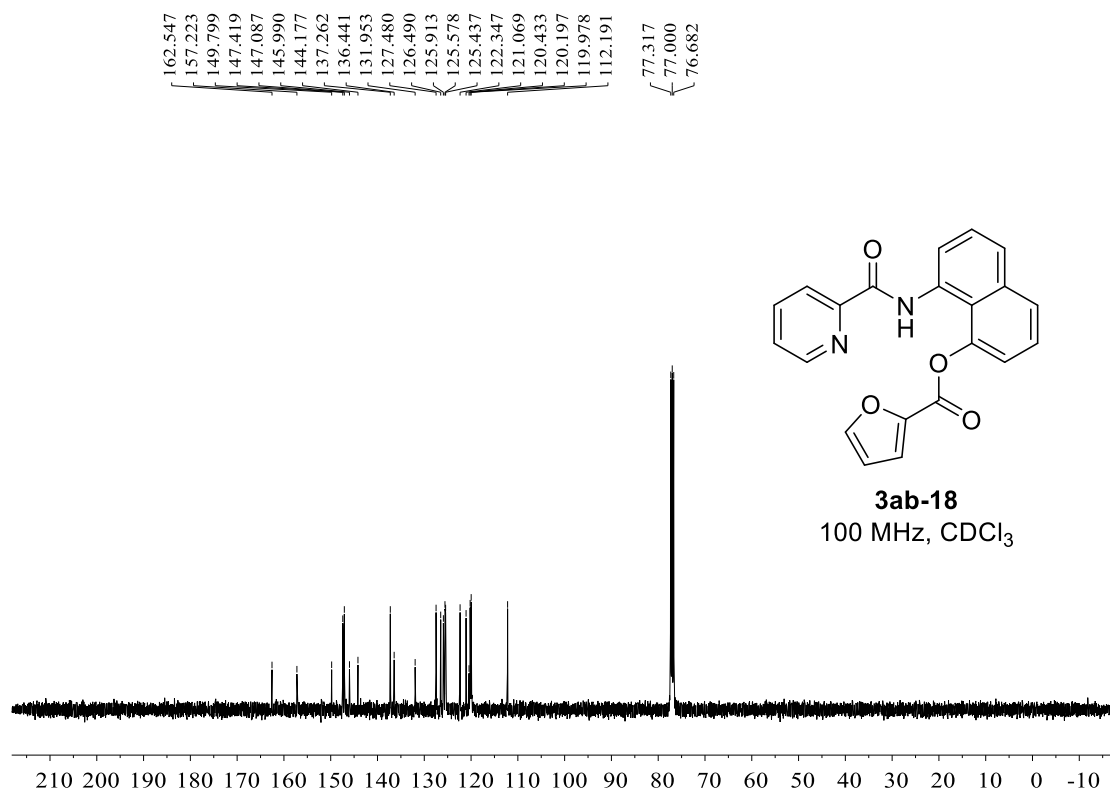

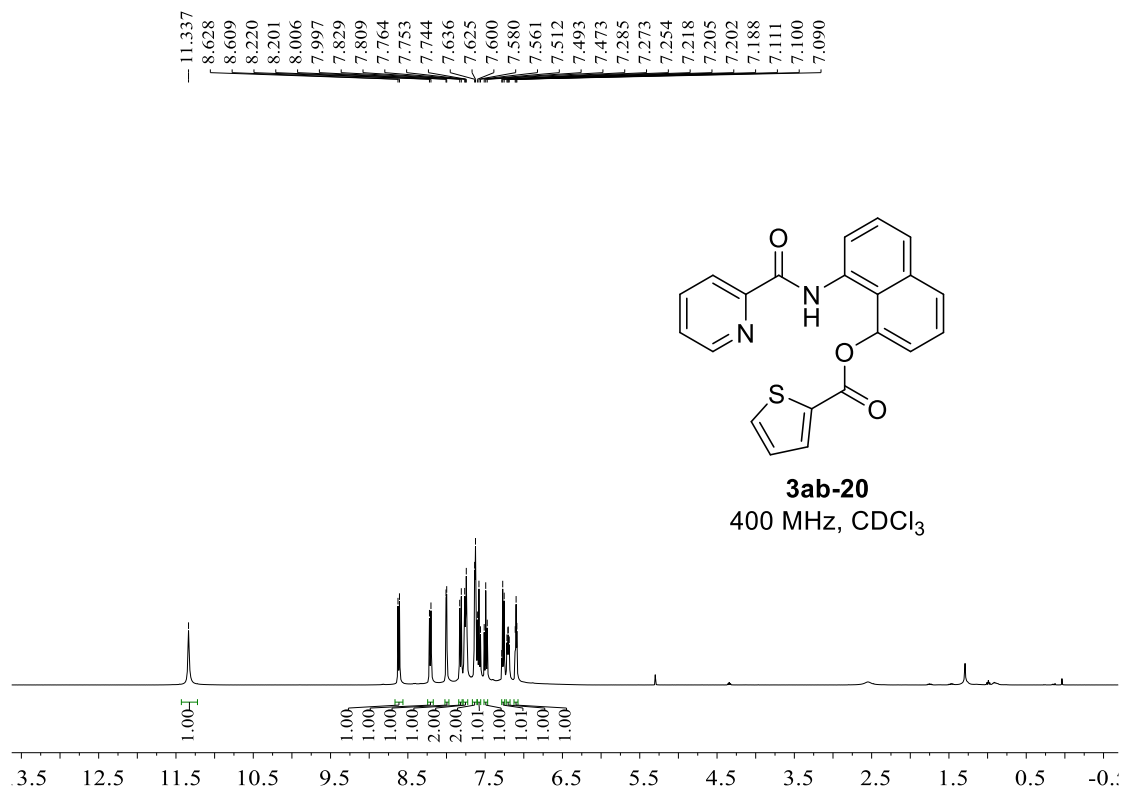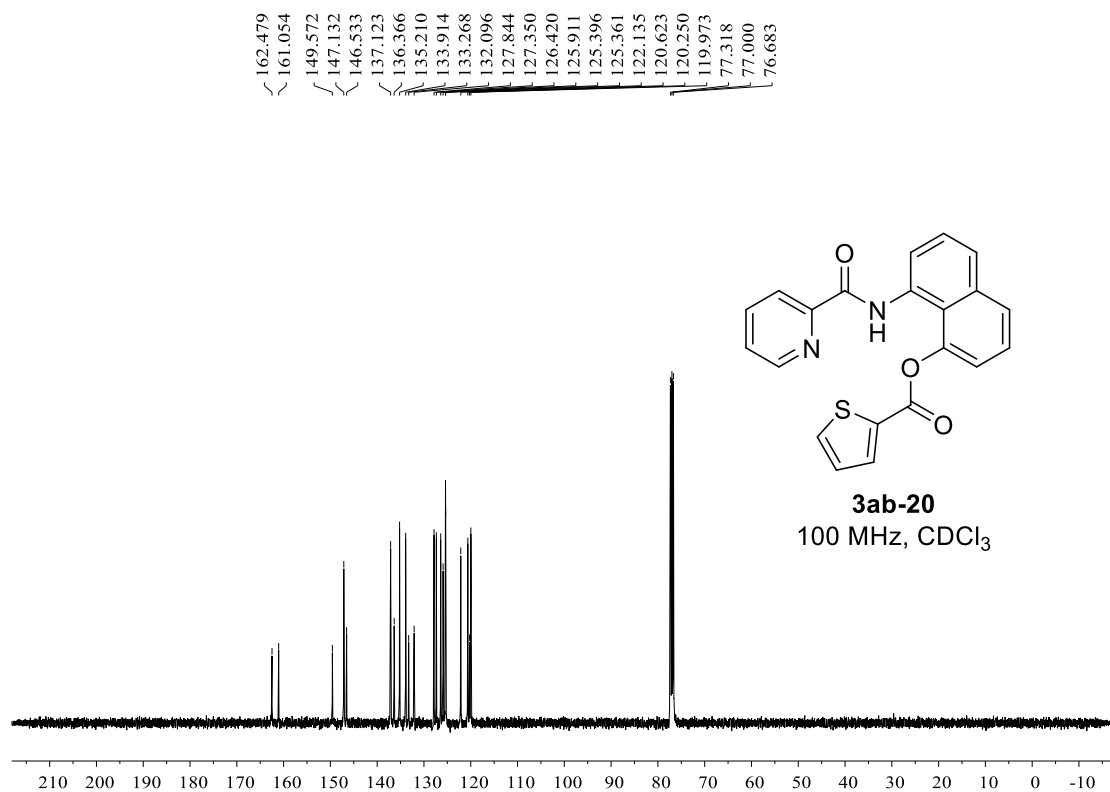

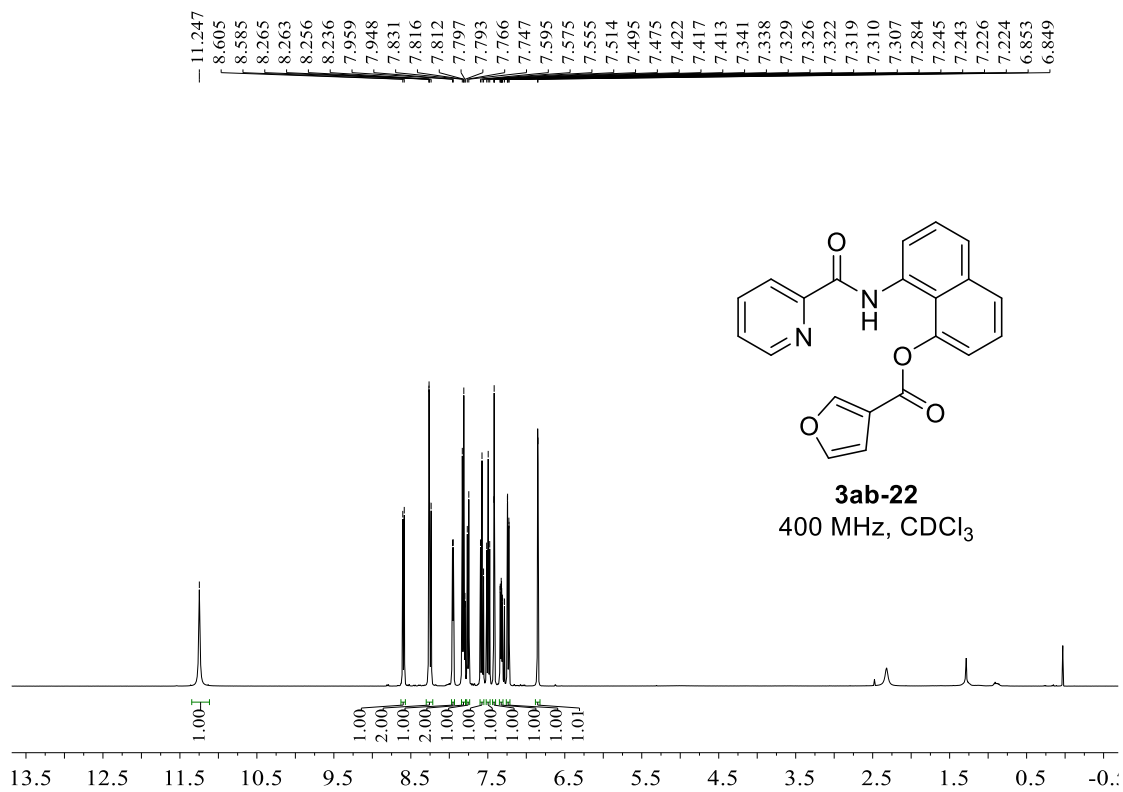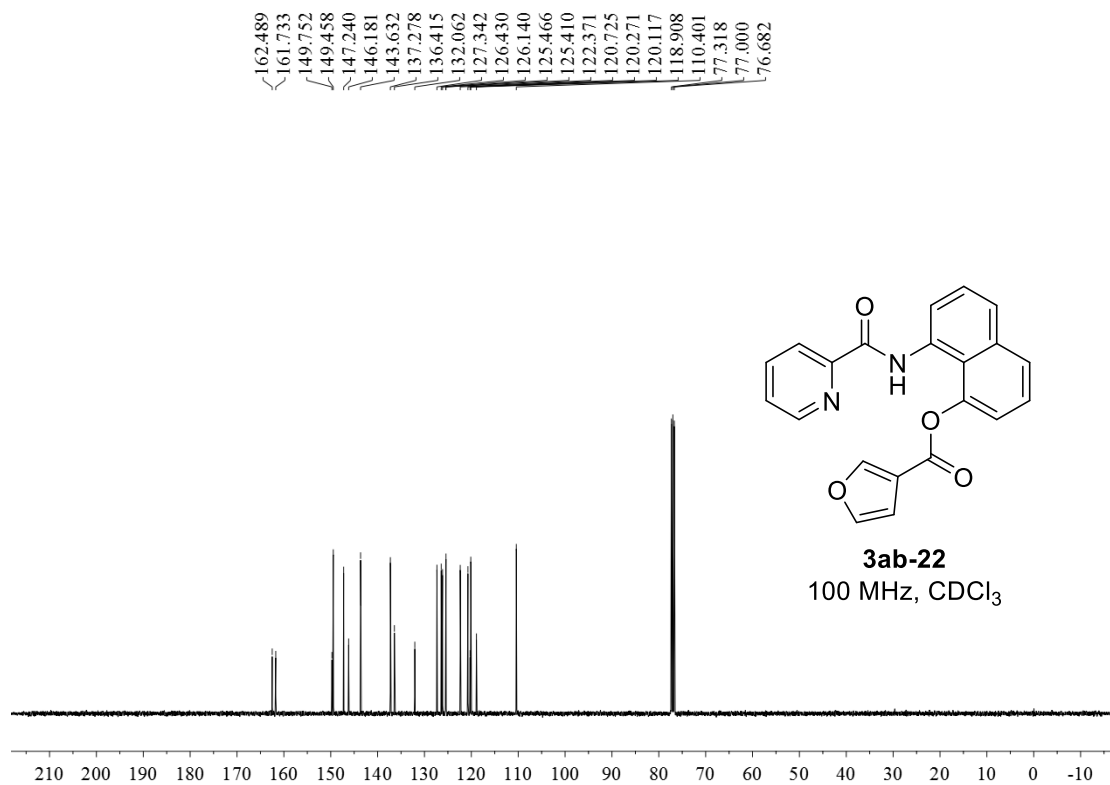

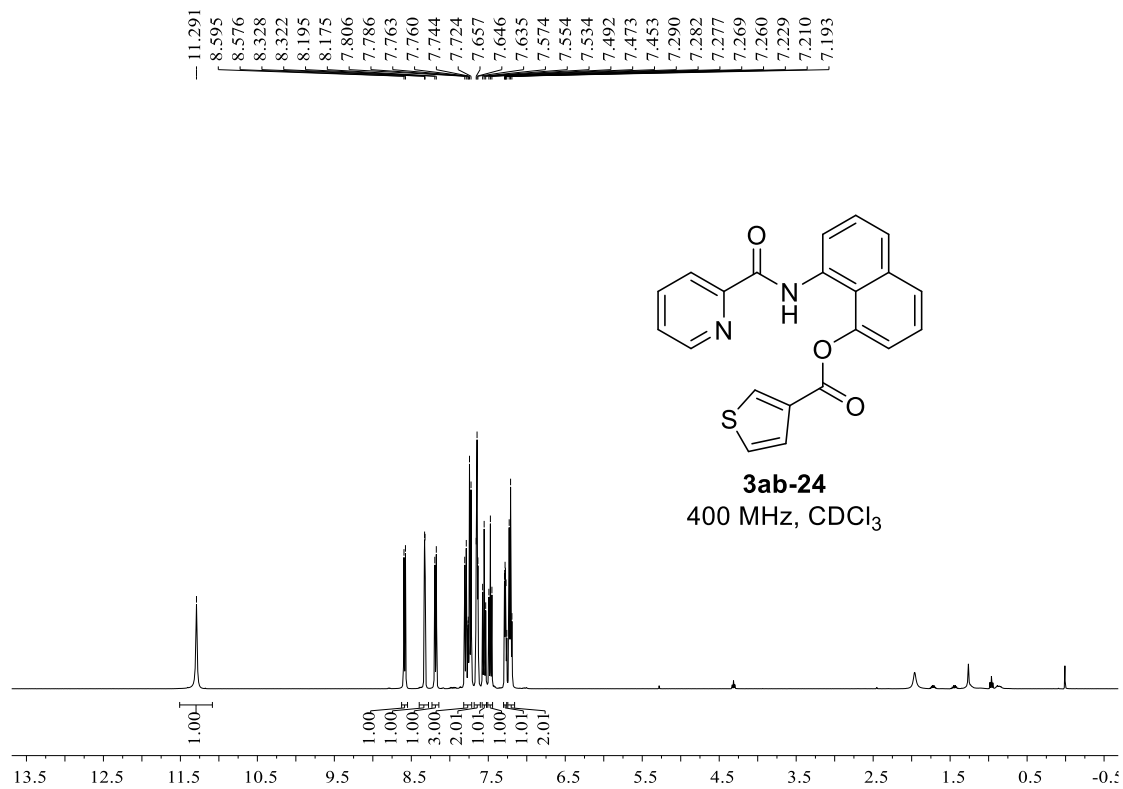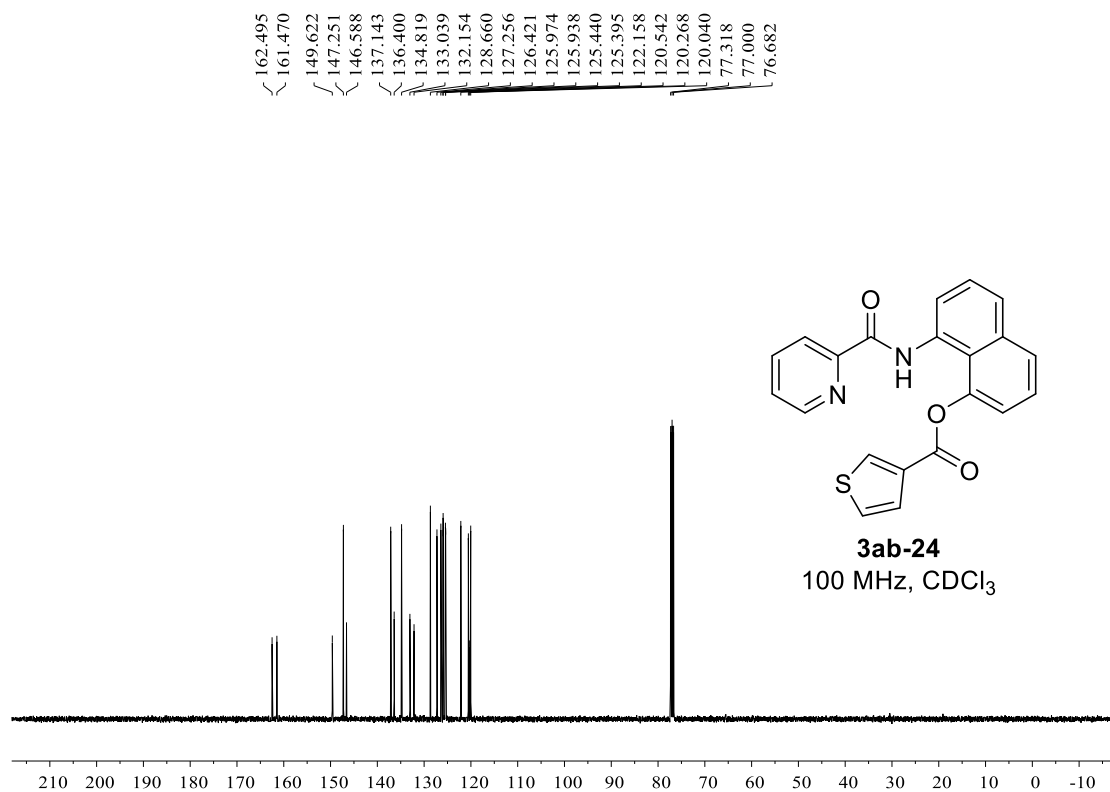



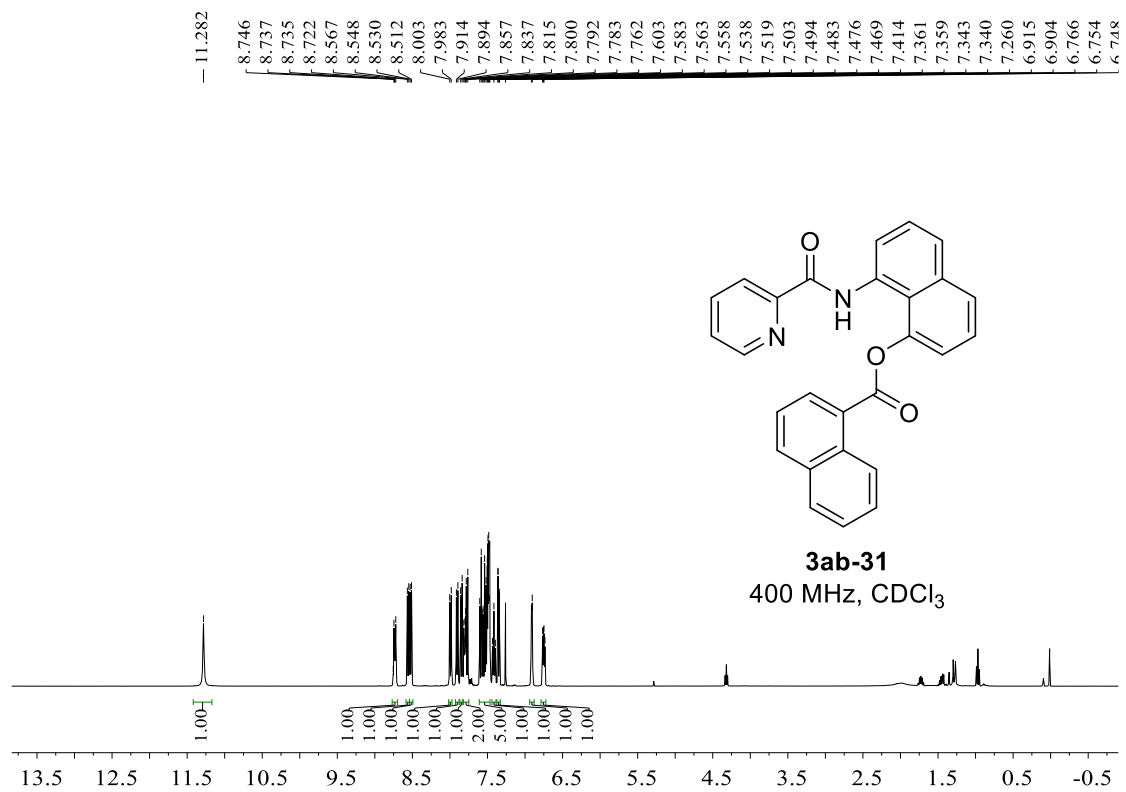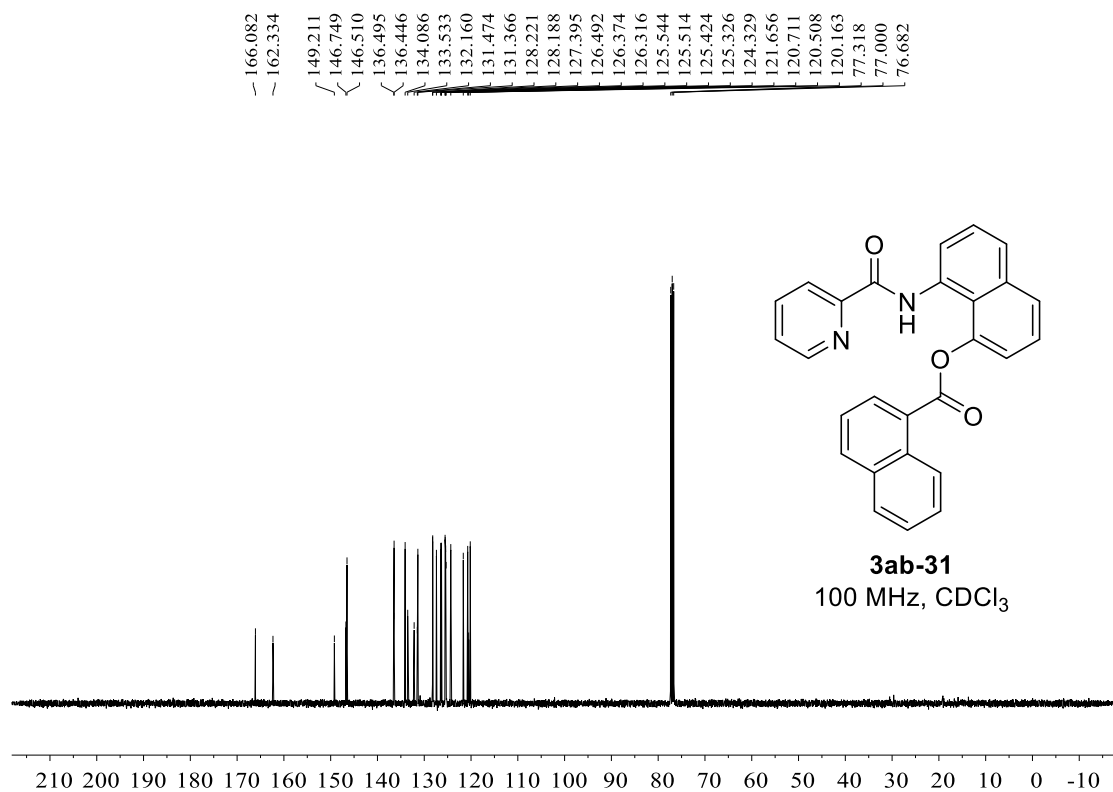



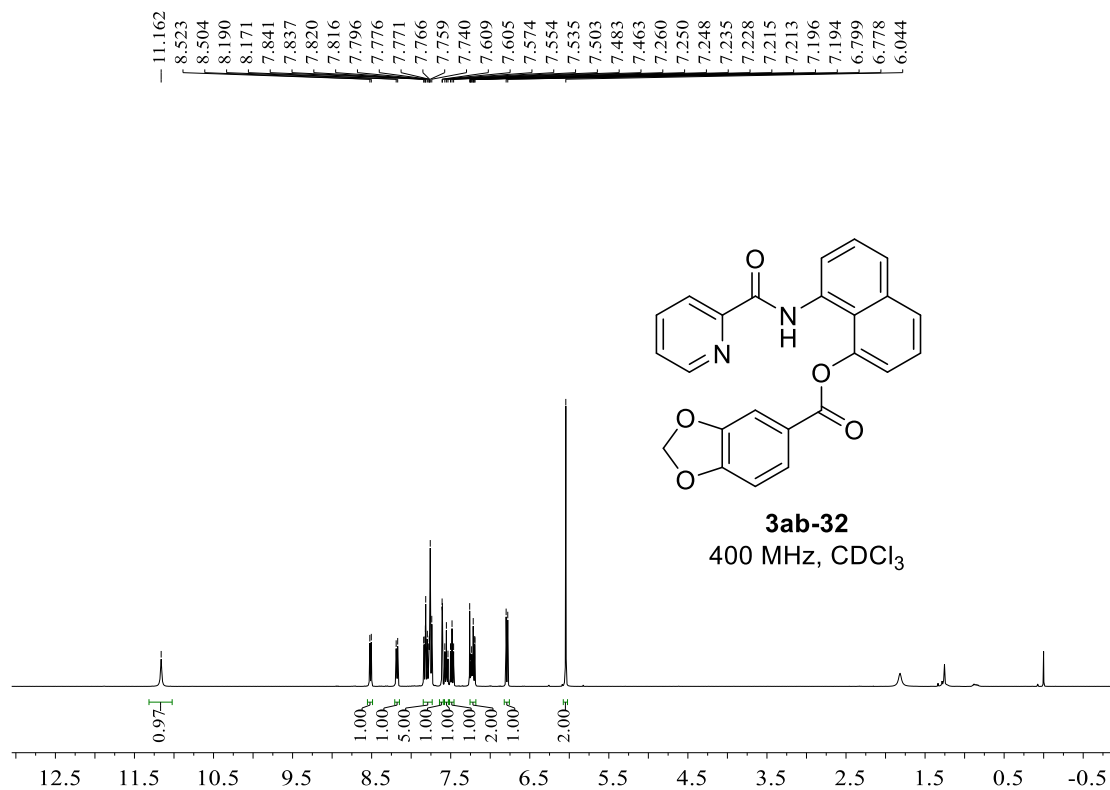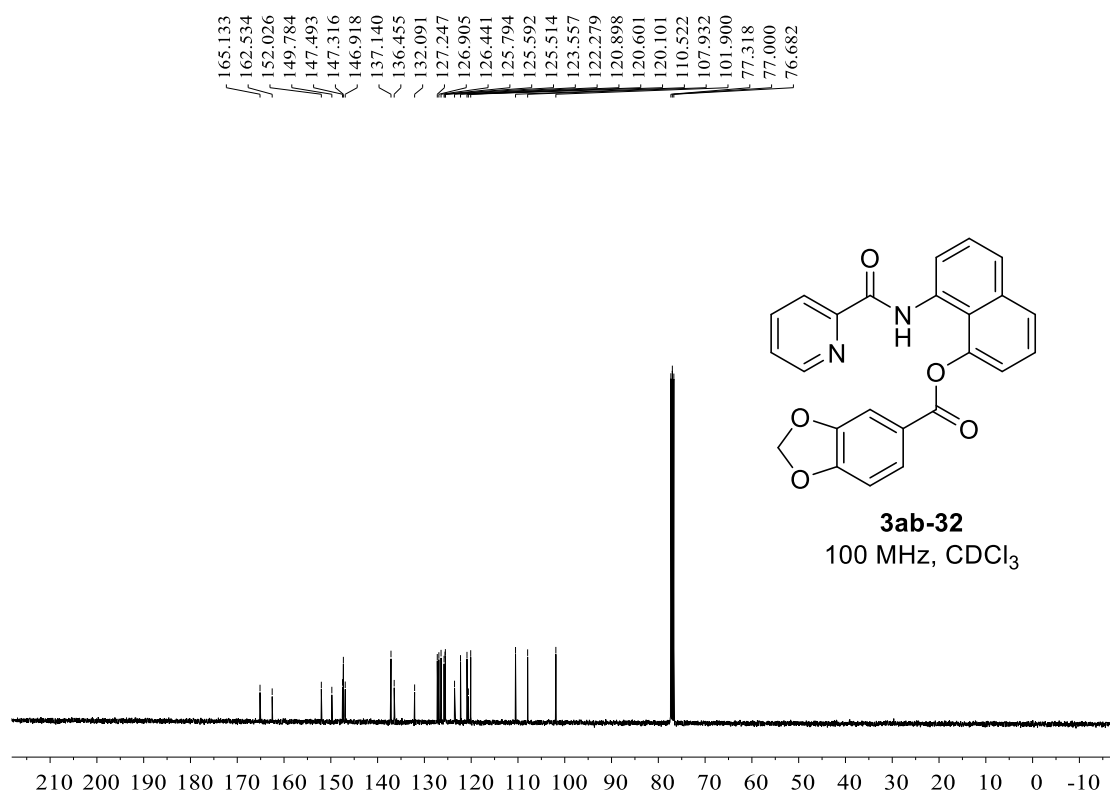



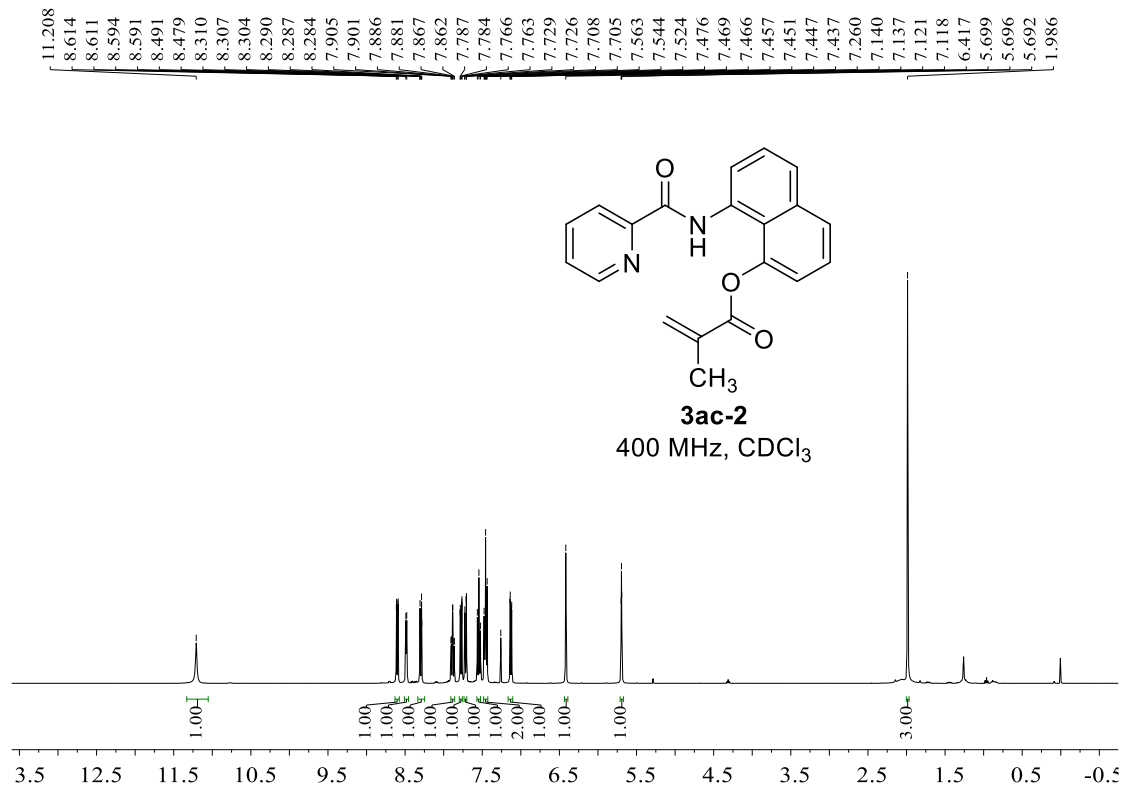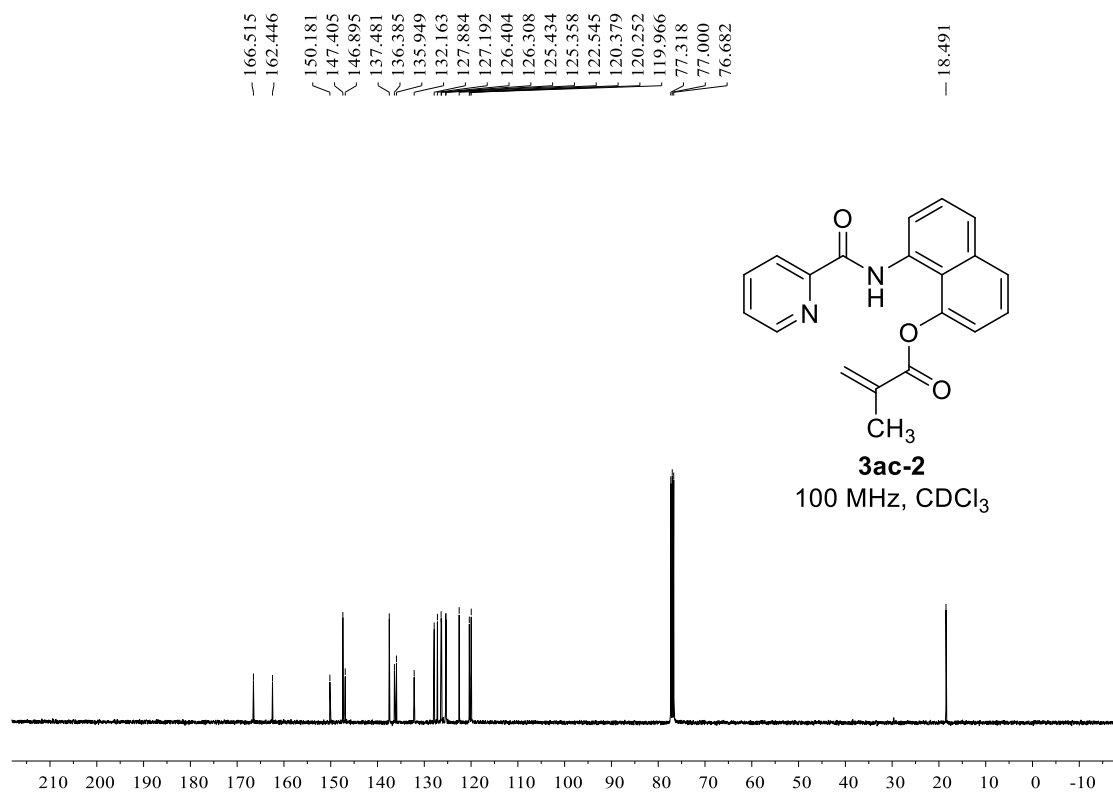

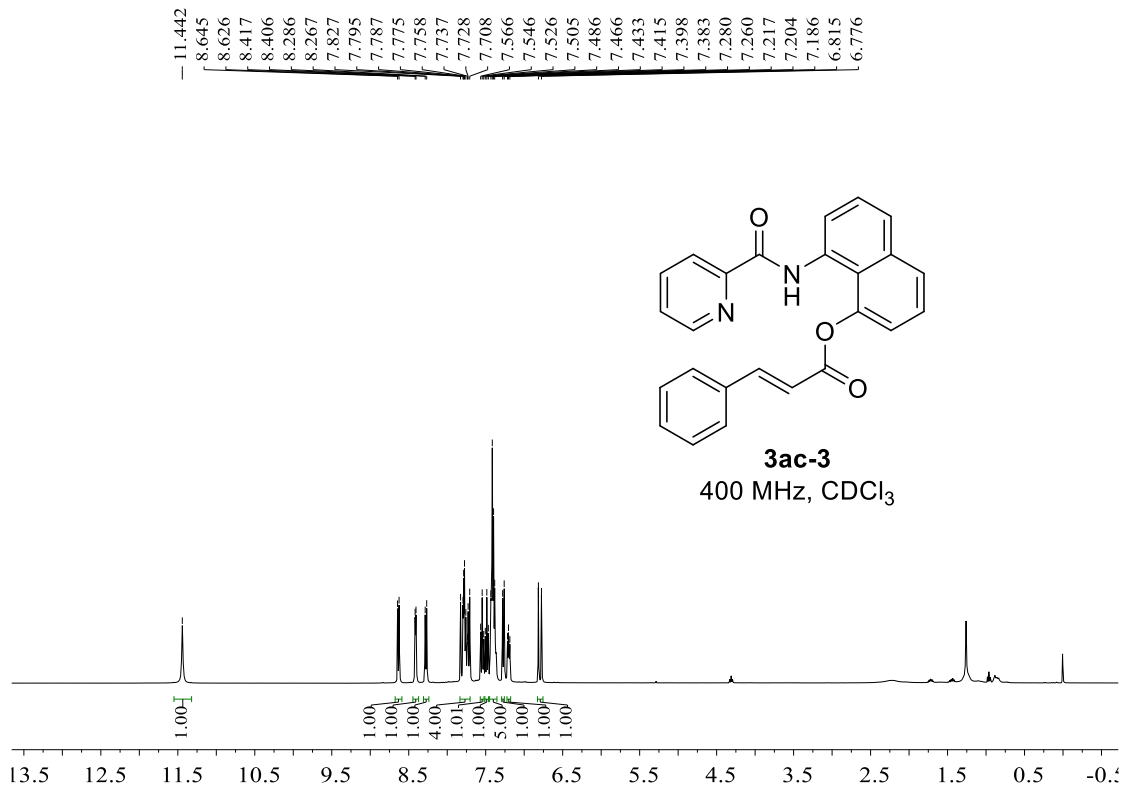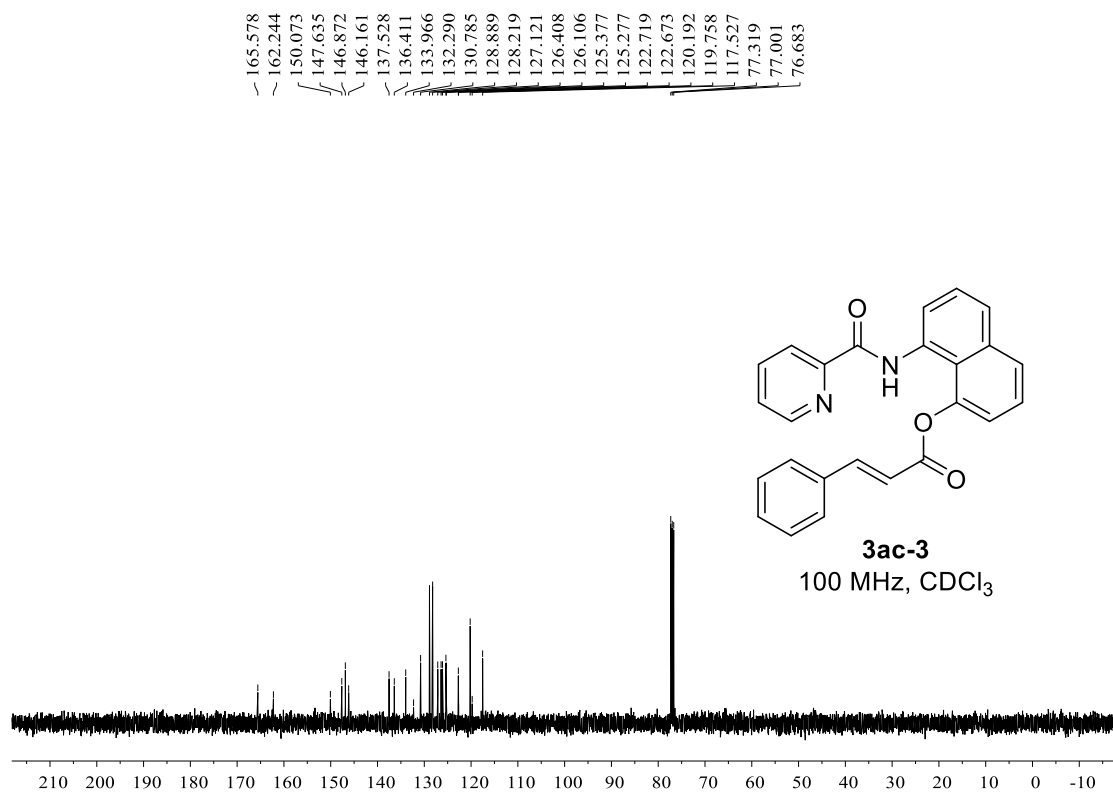

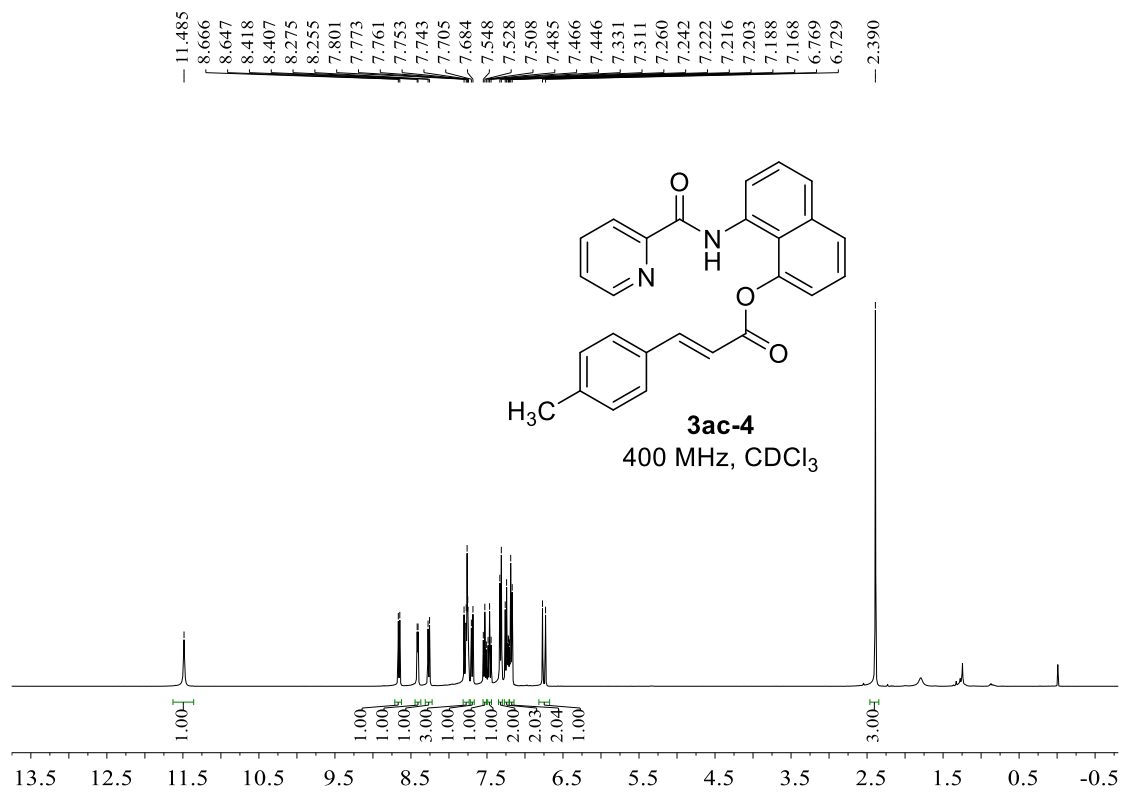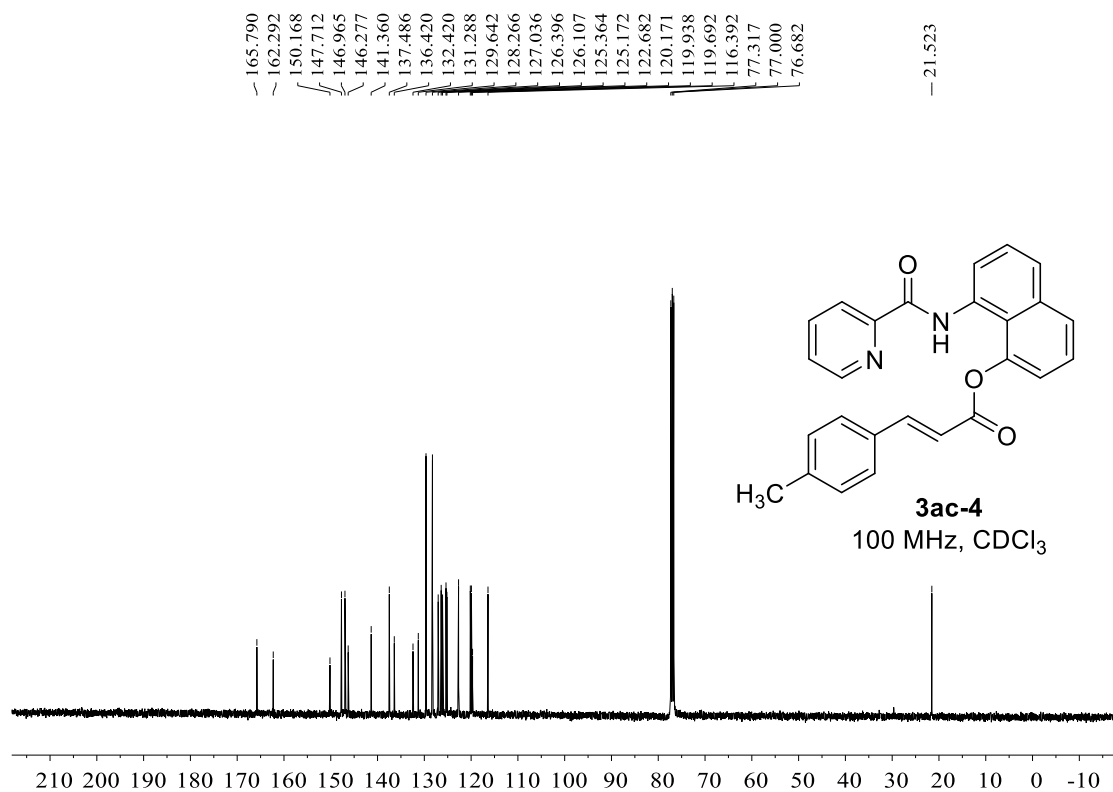

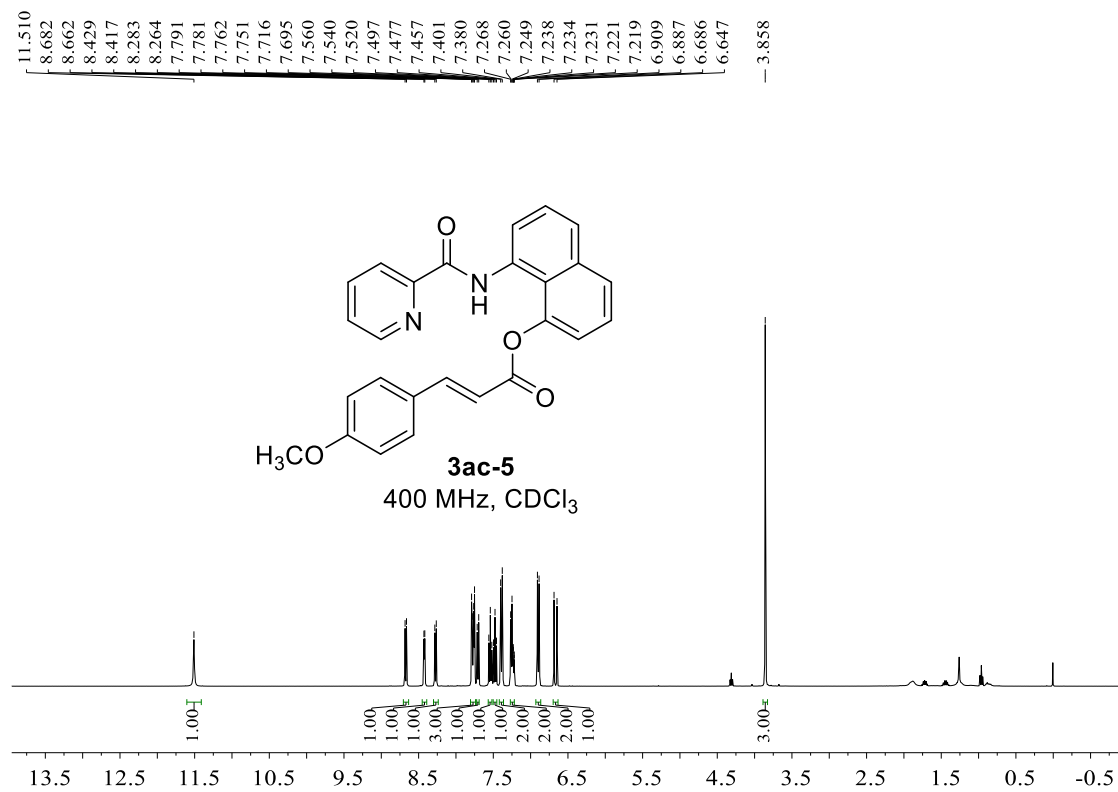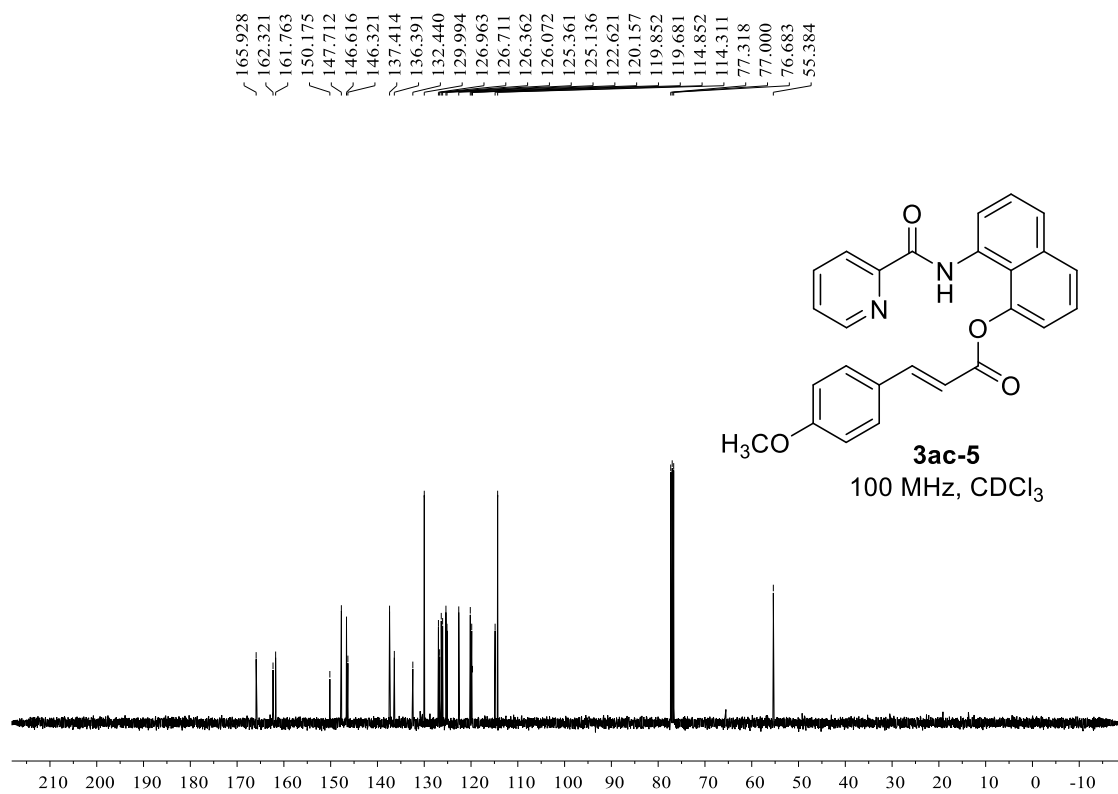

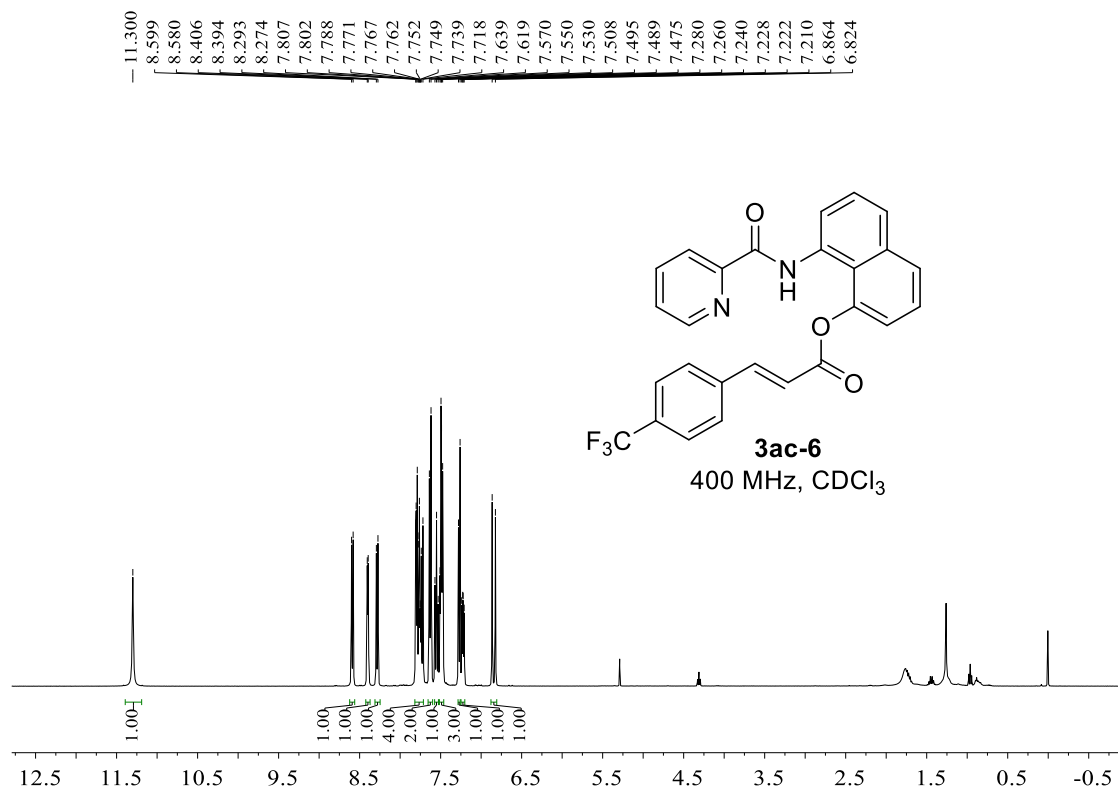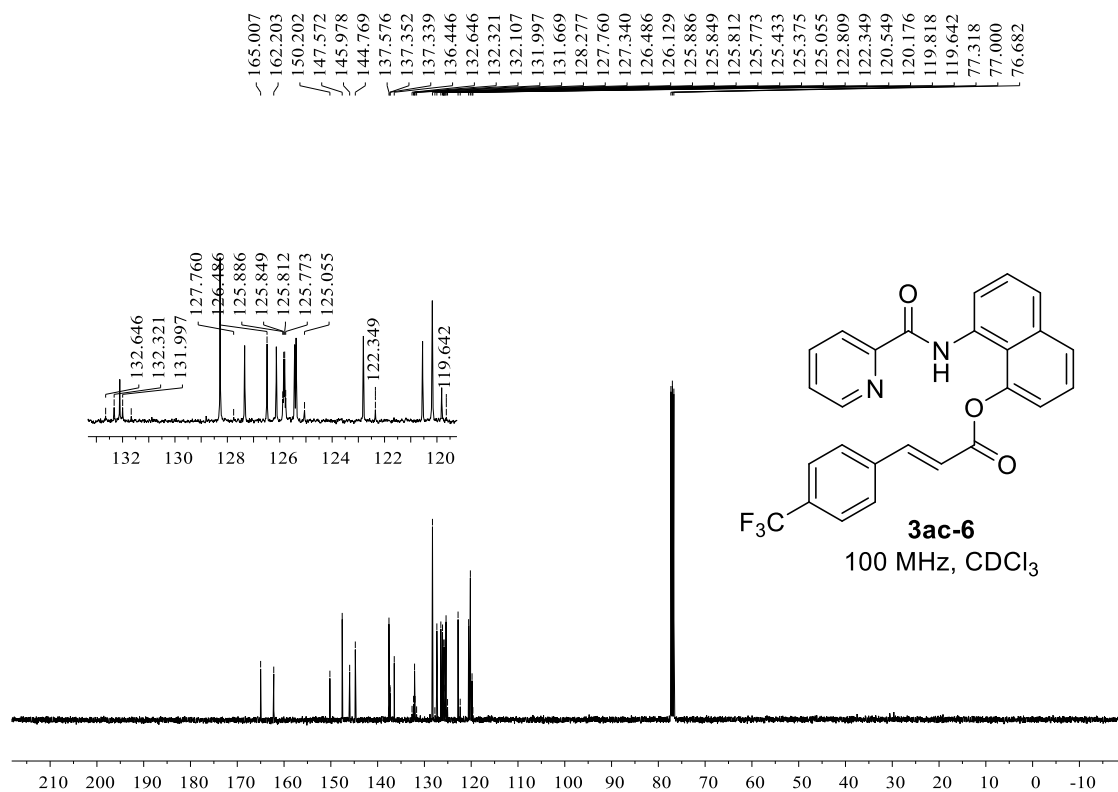

-62.853

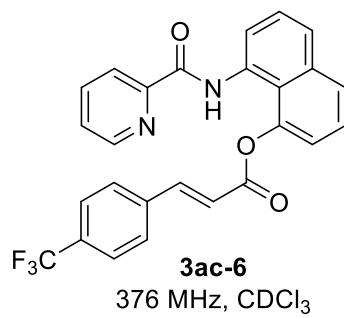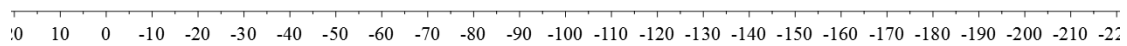



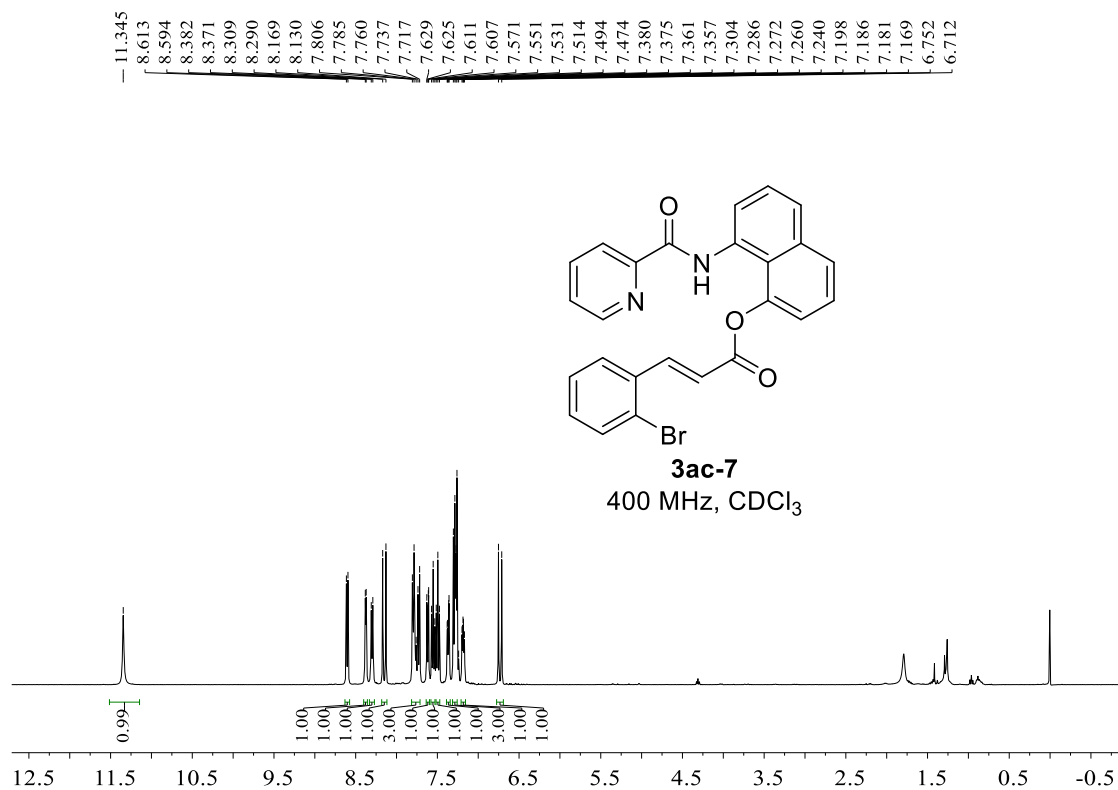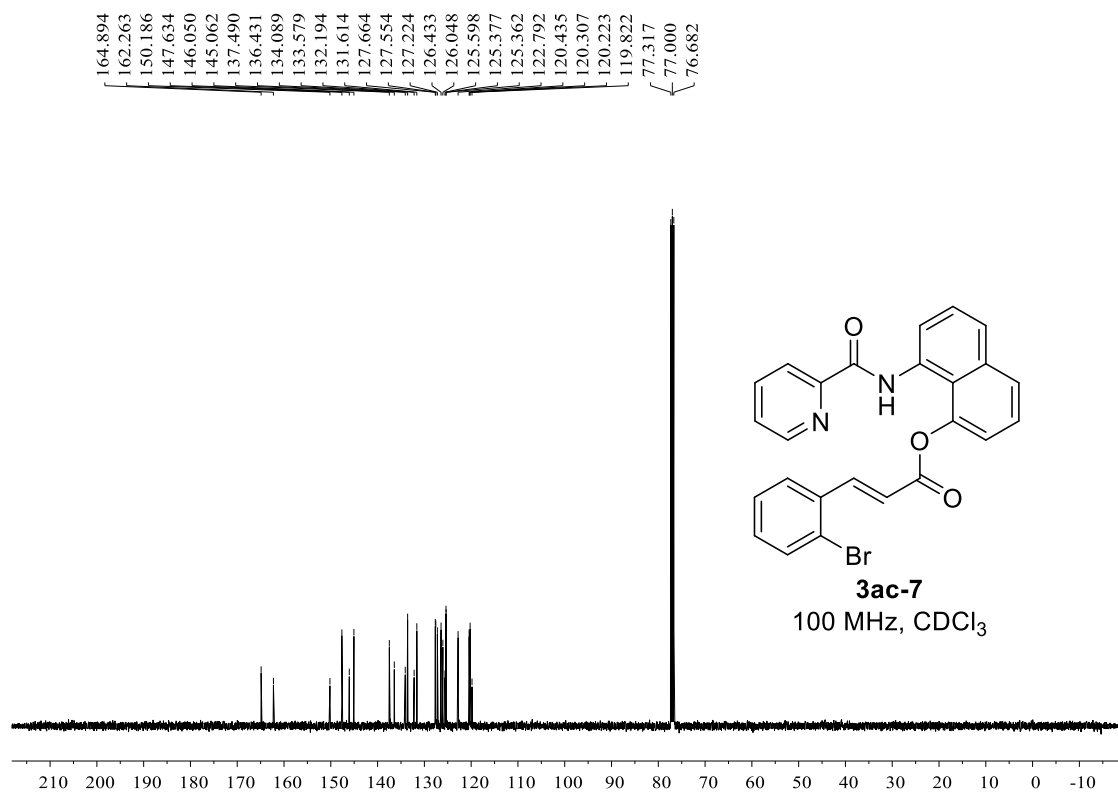







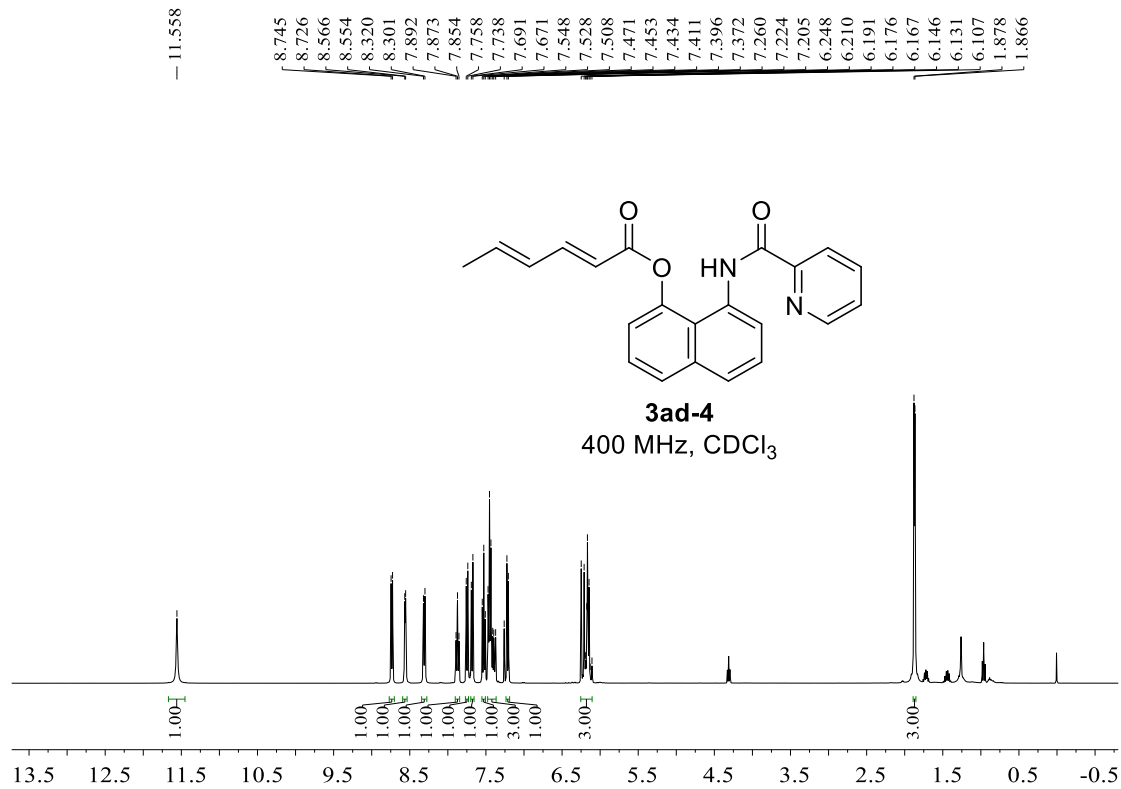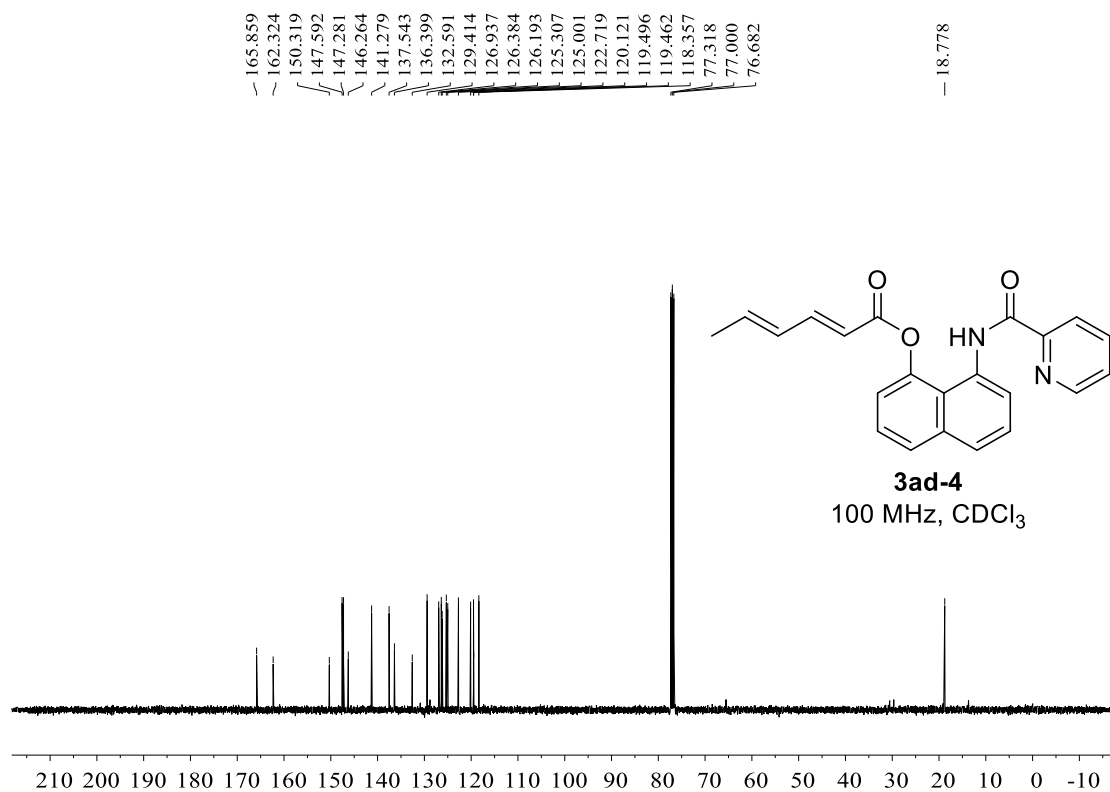

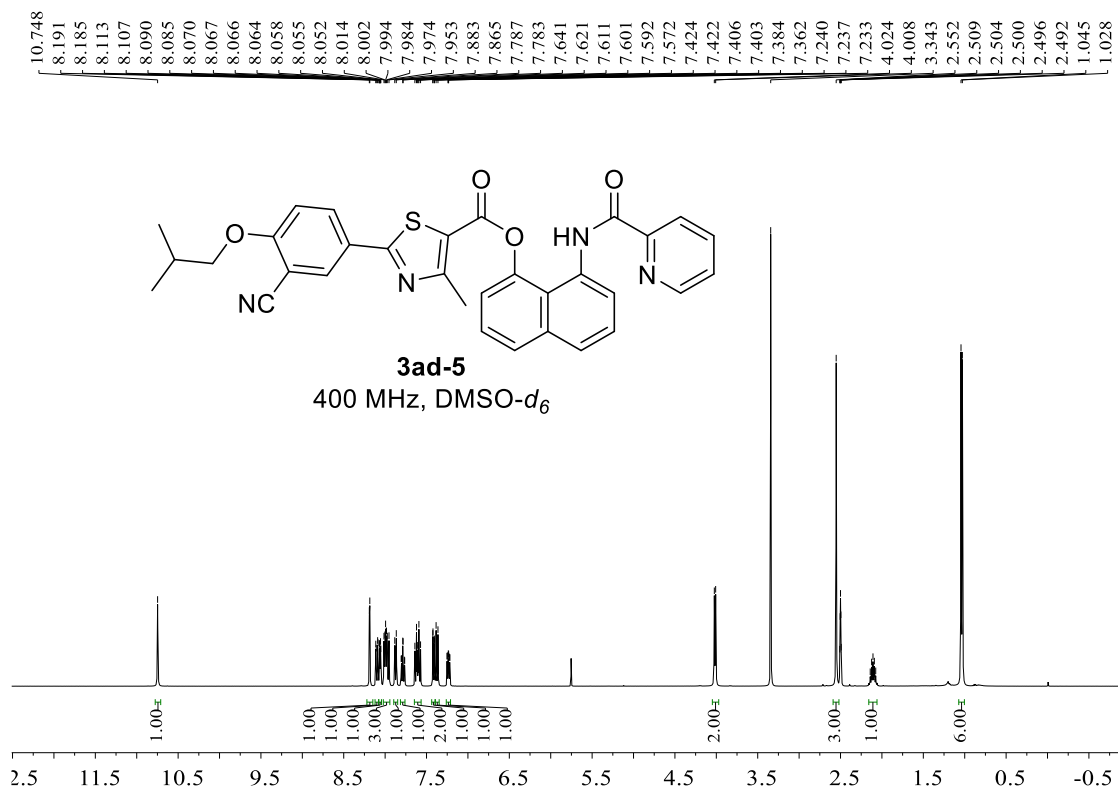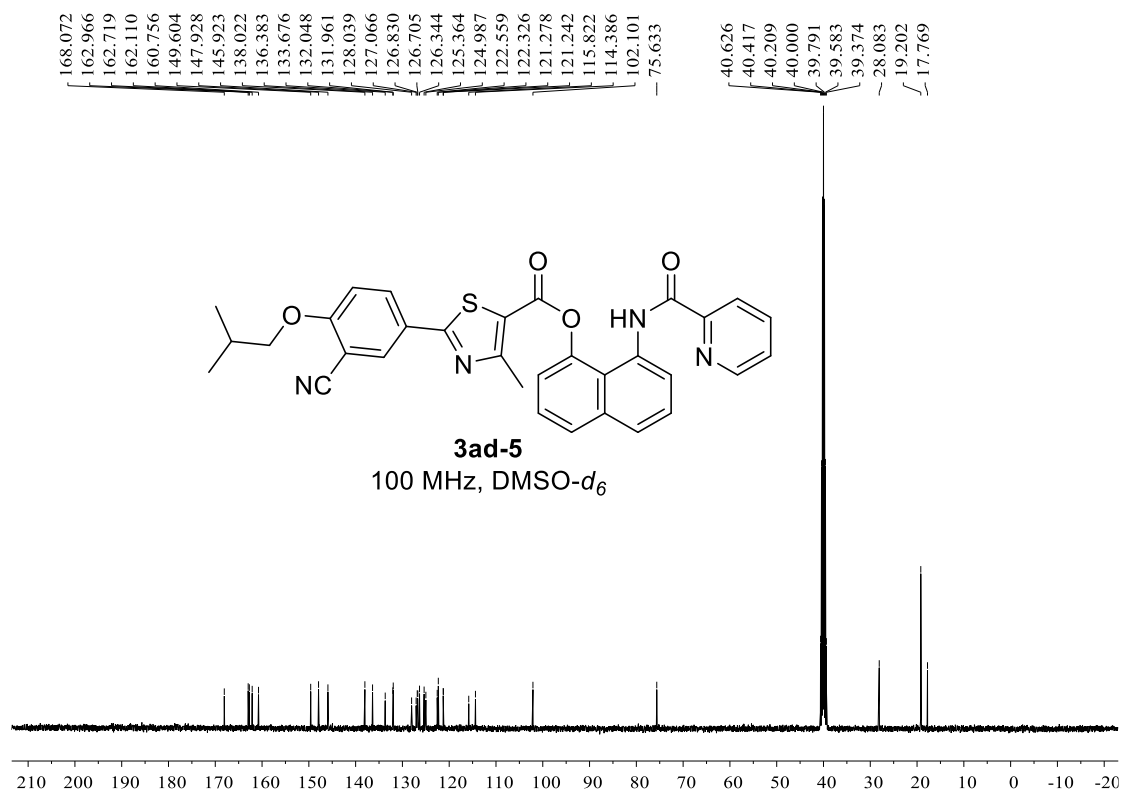



--68.788

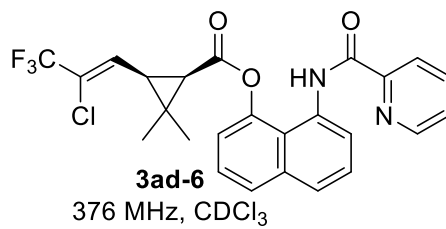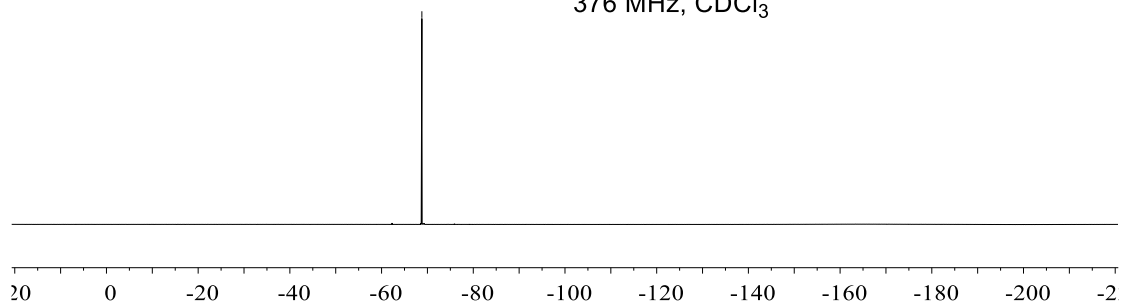



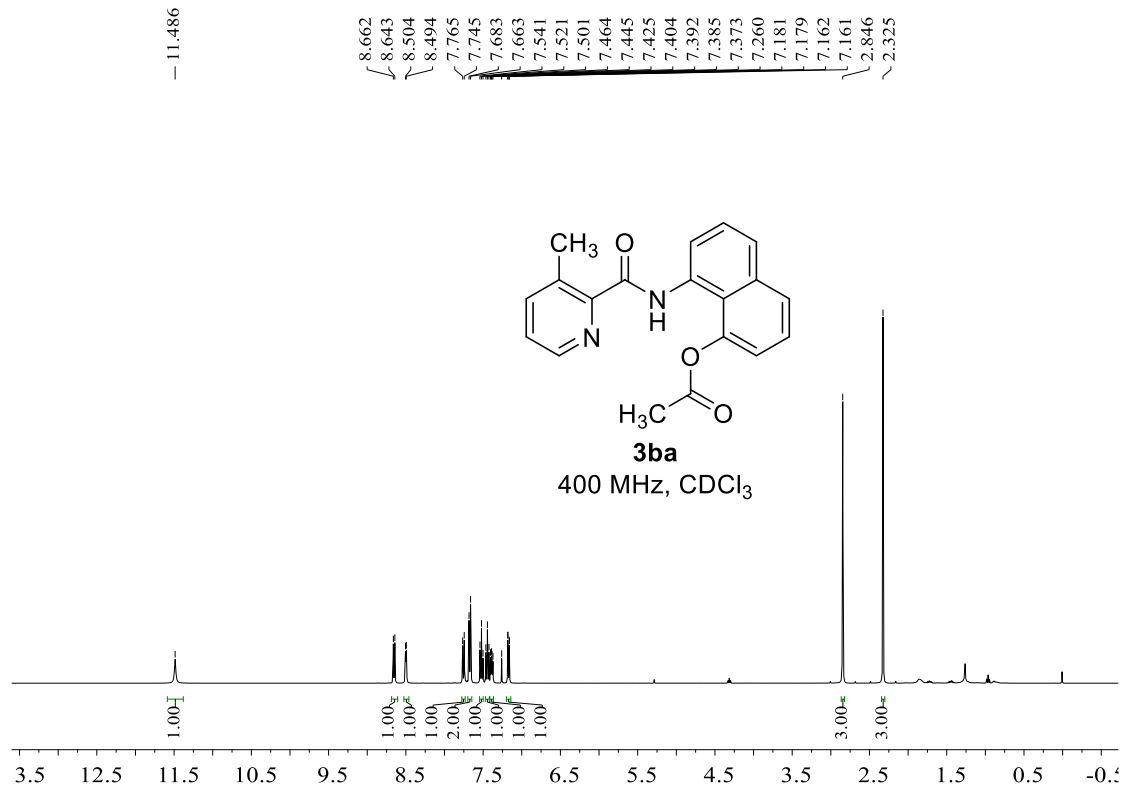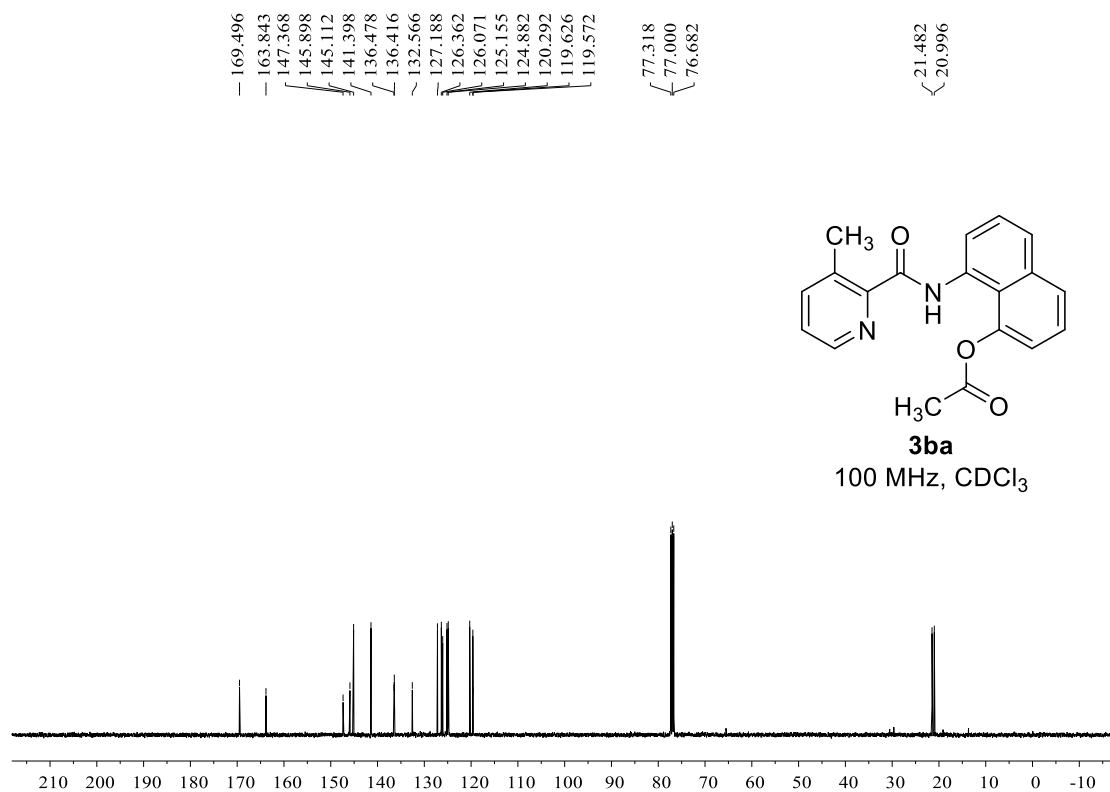

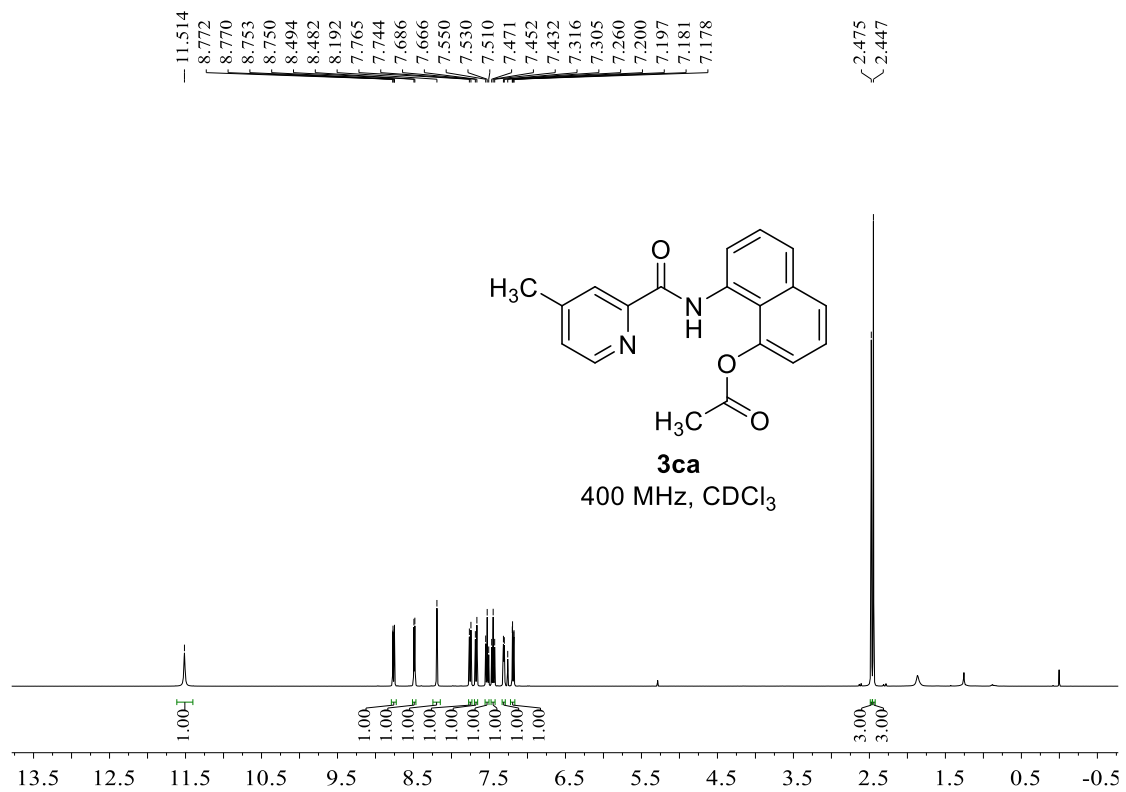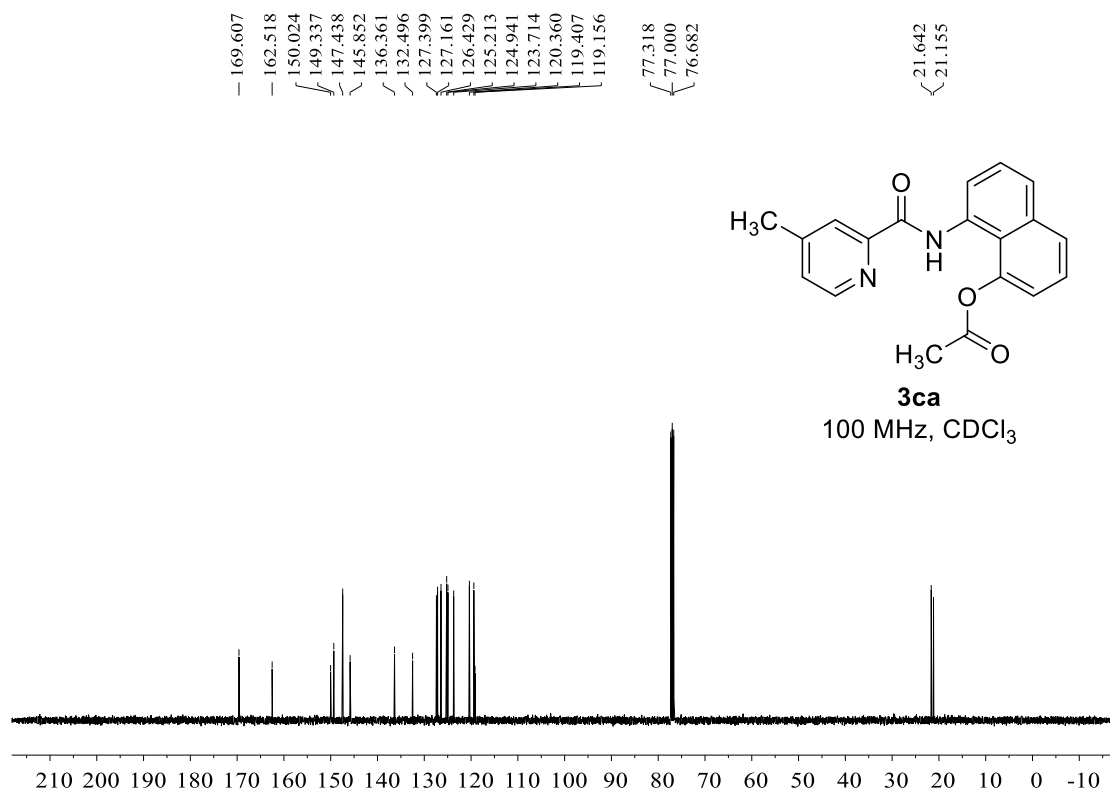

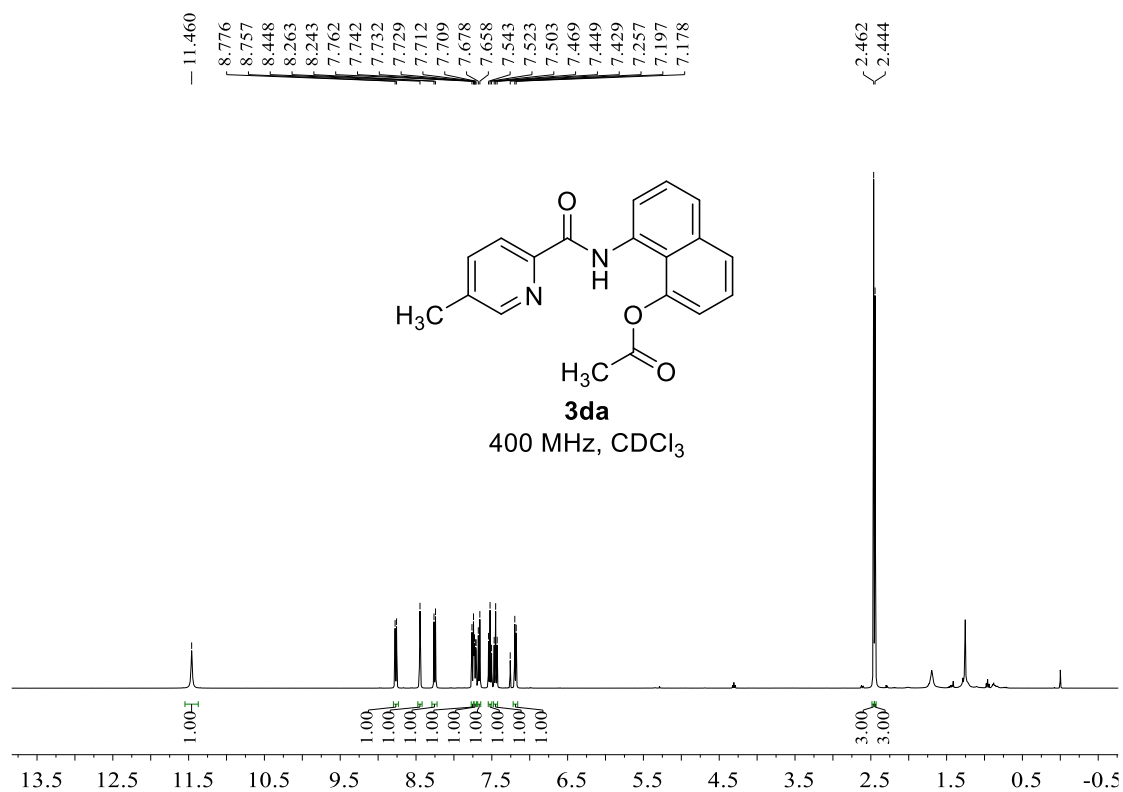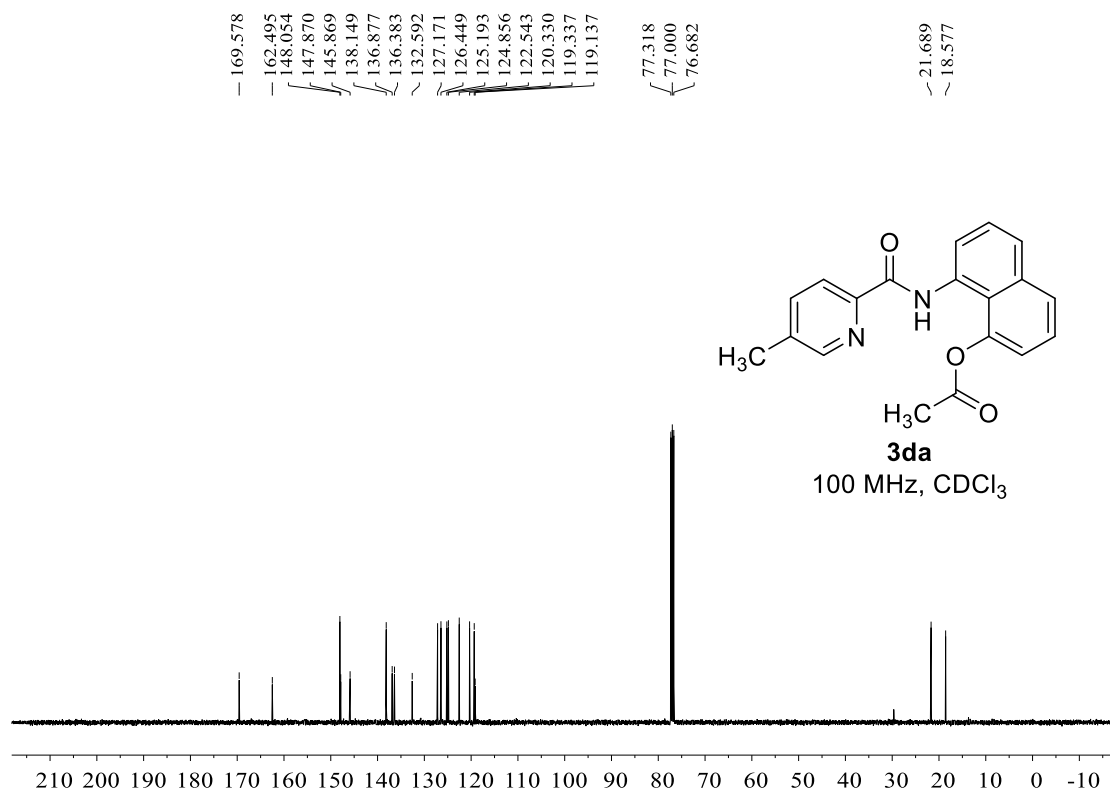



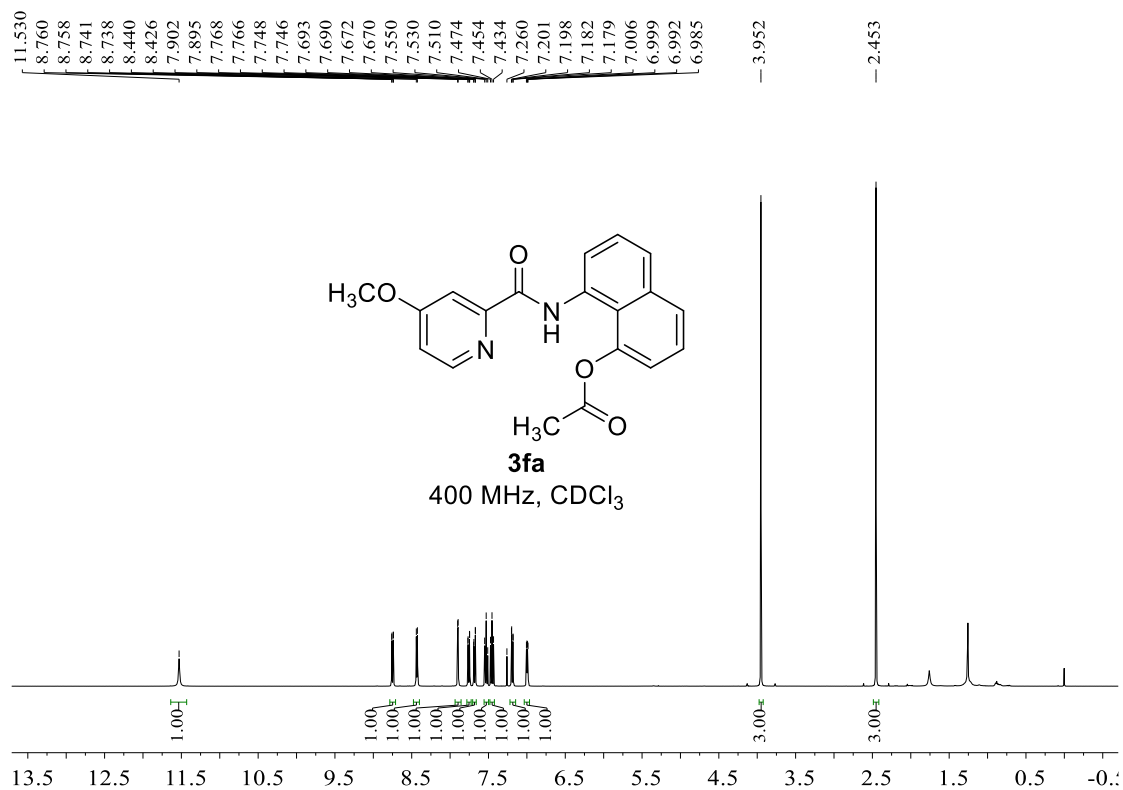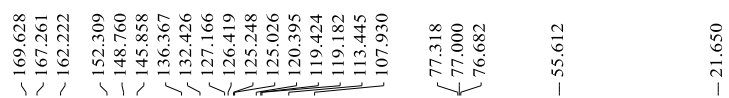

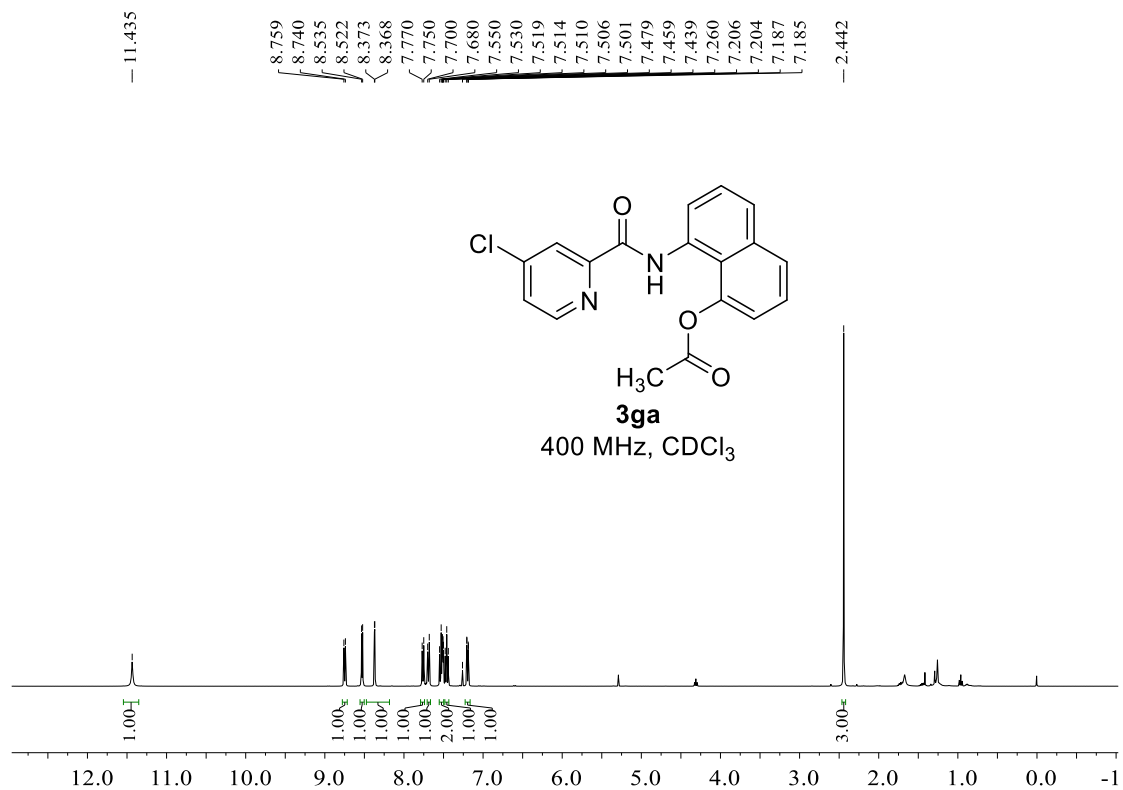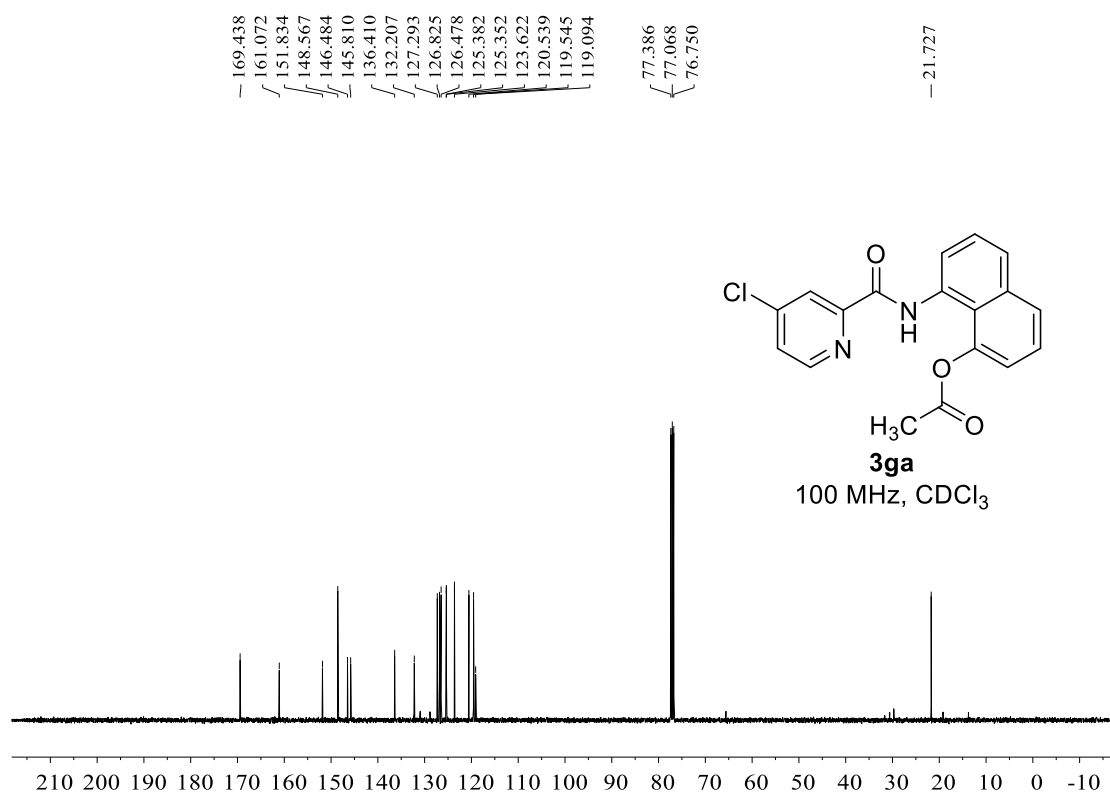

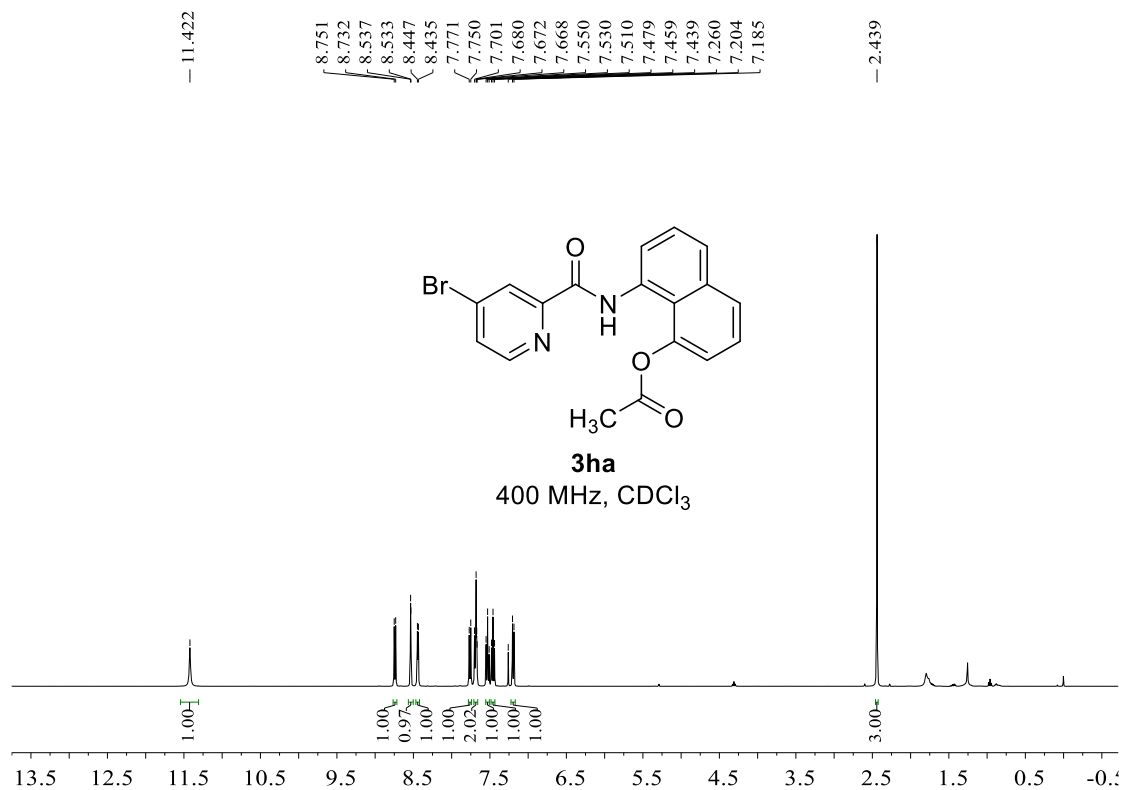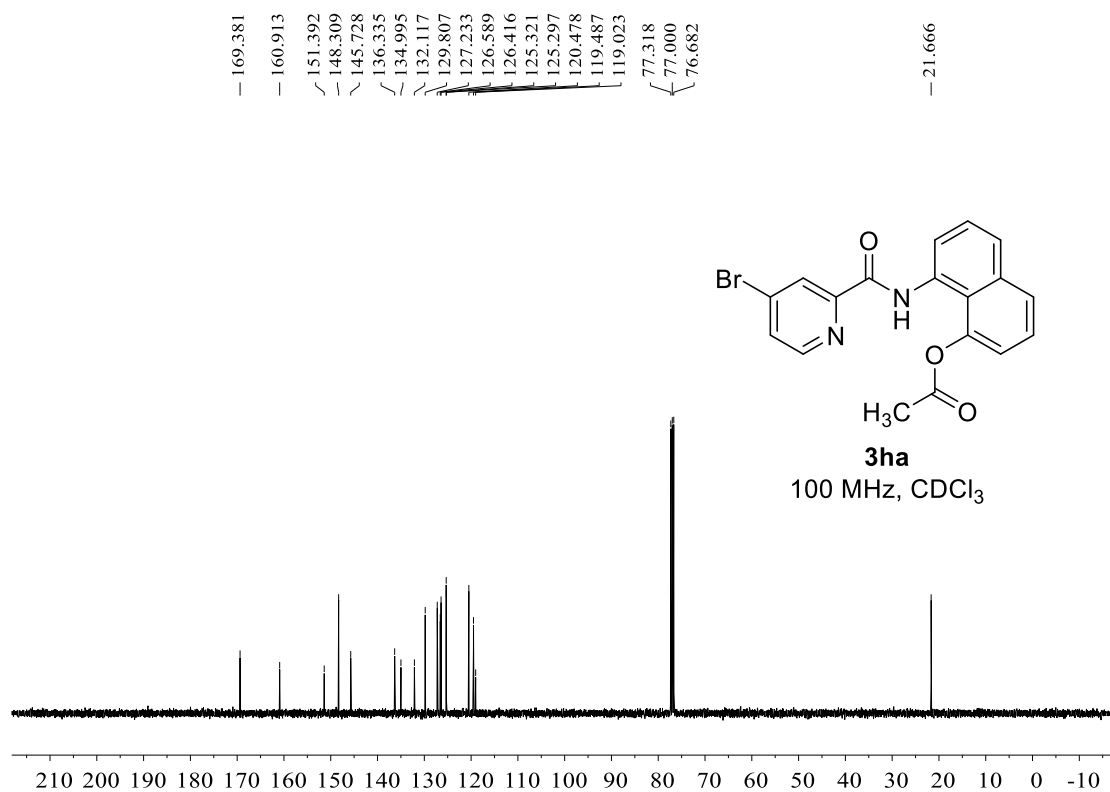

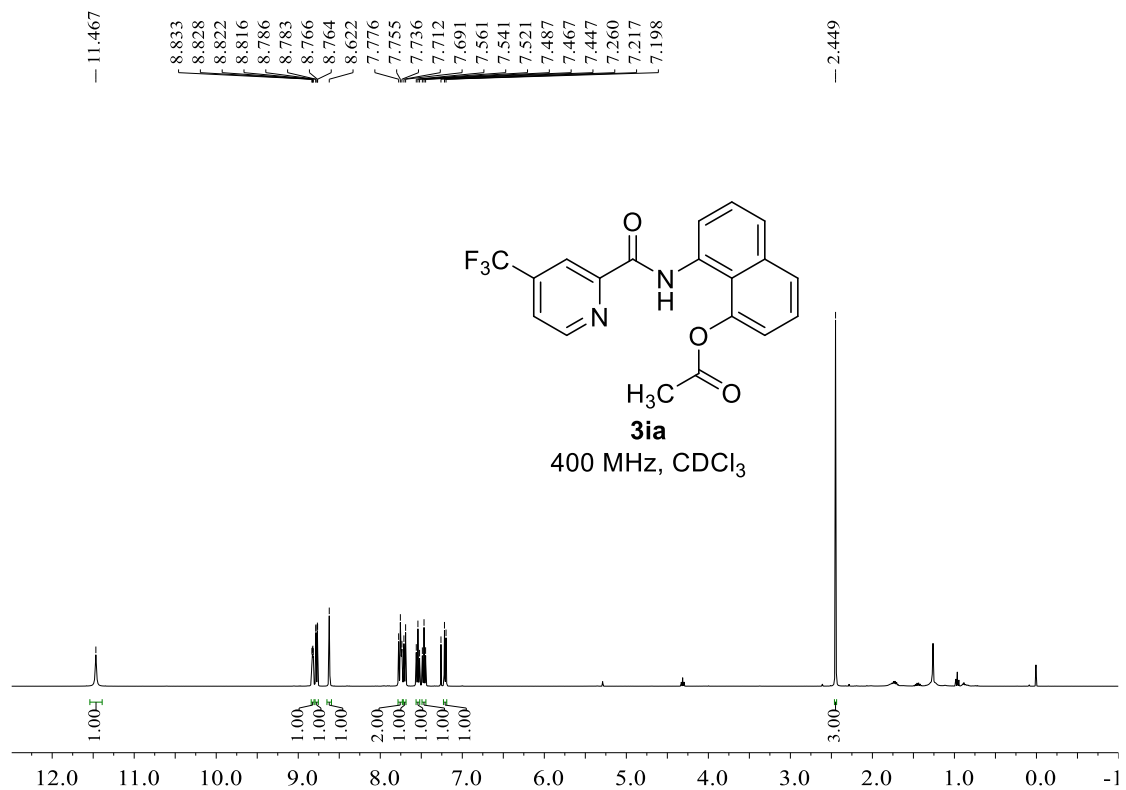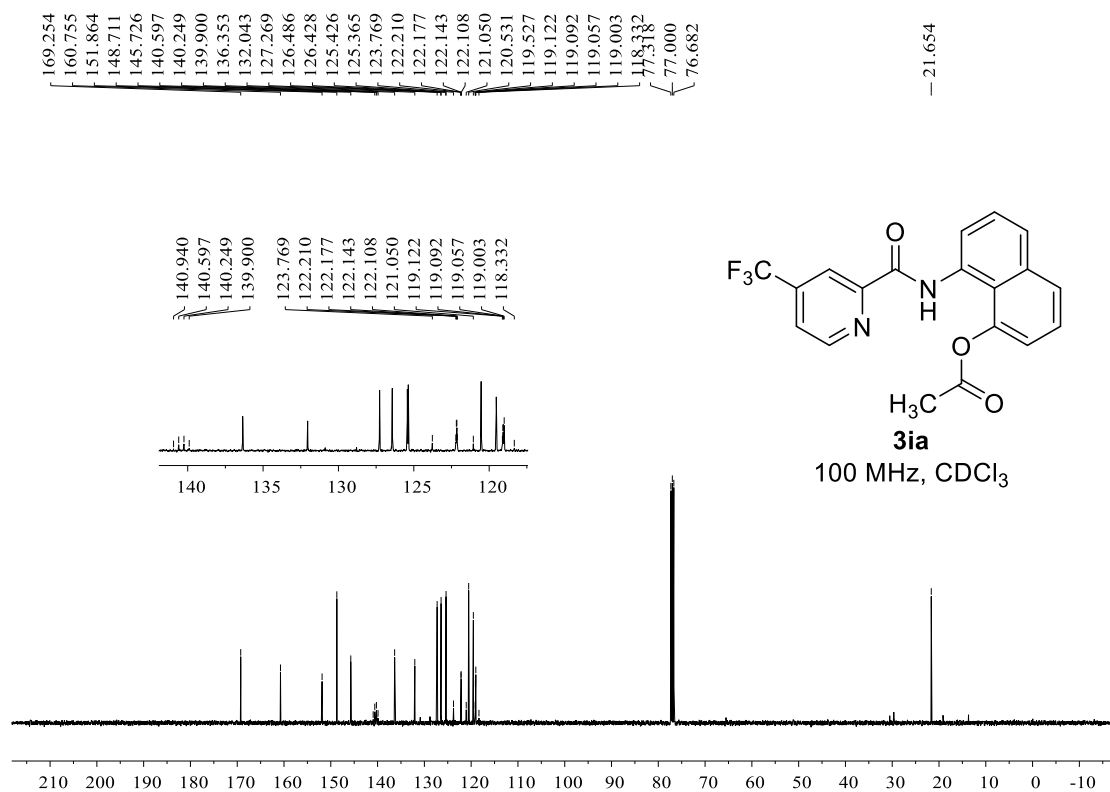



--64.785

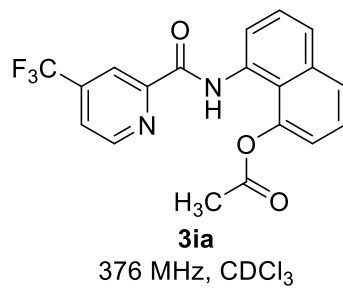

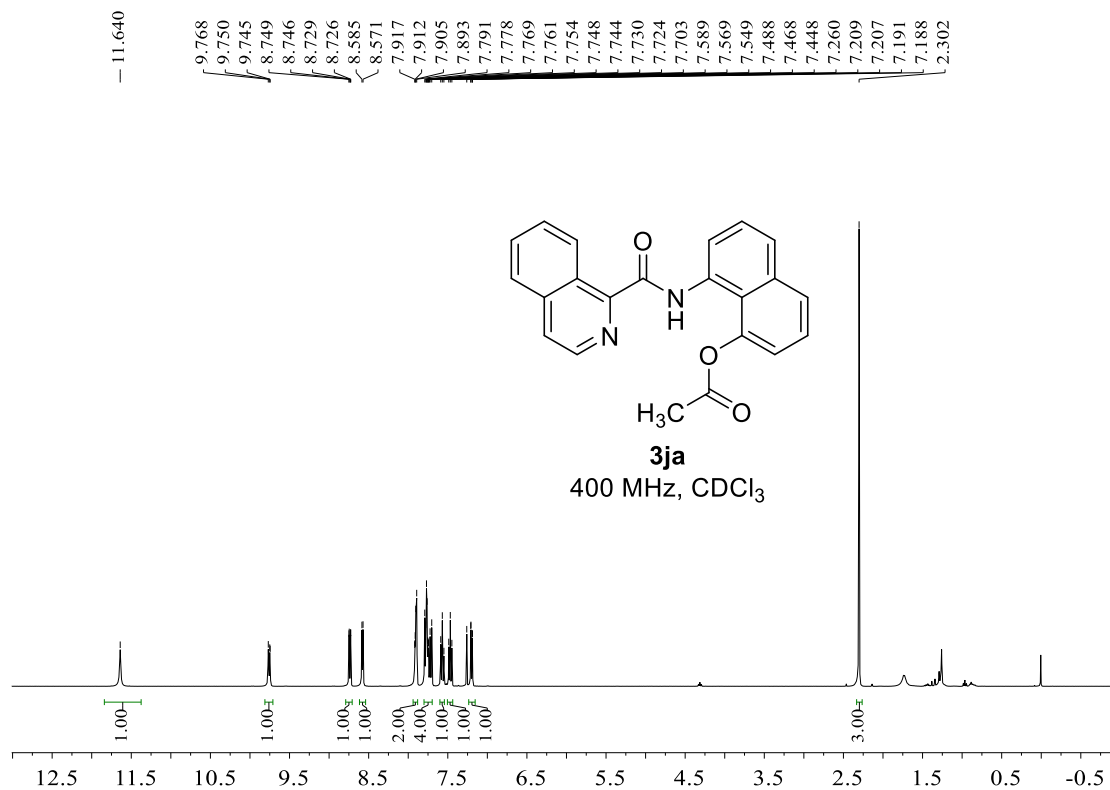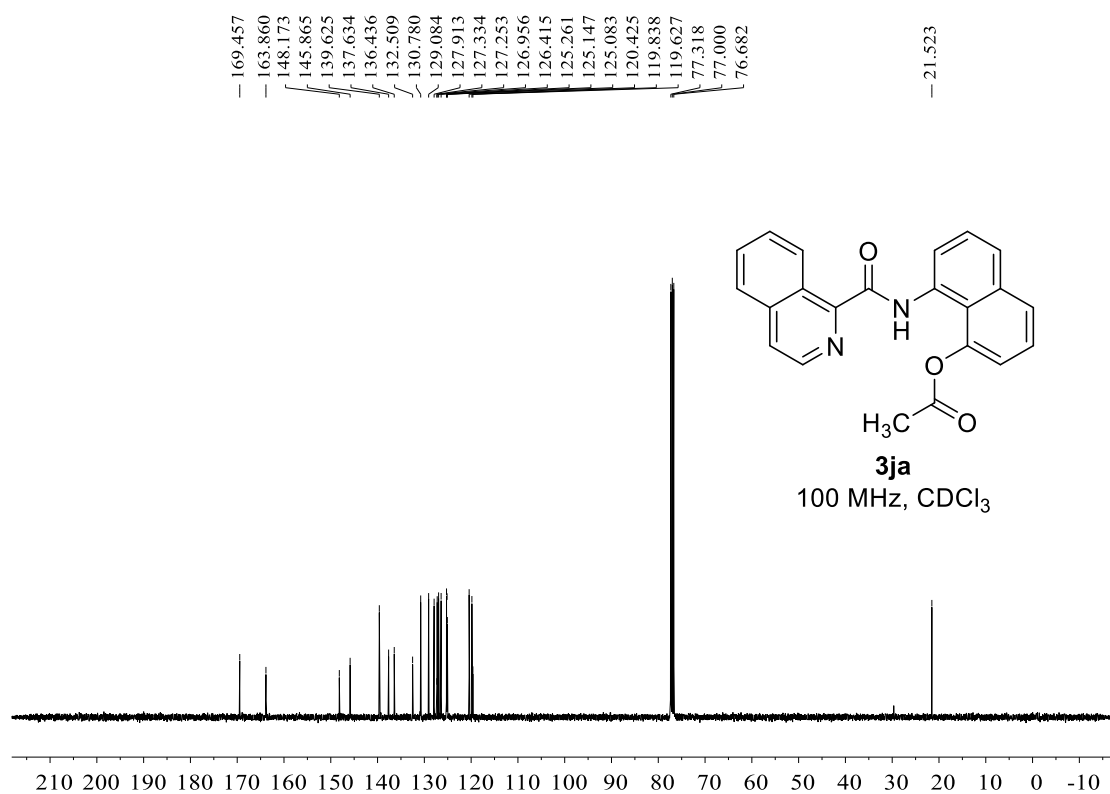

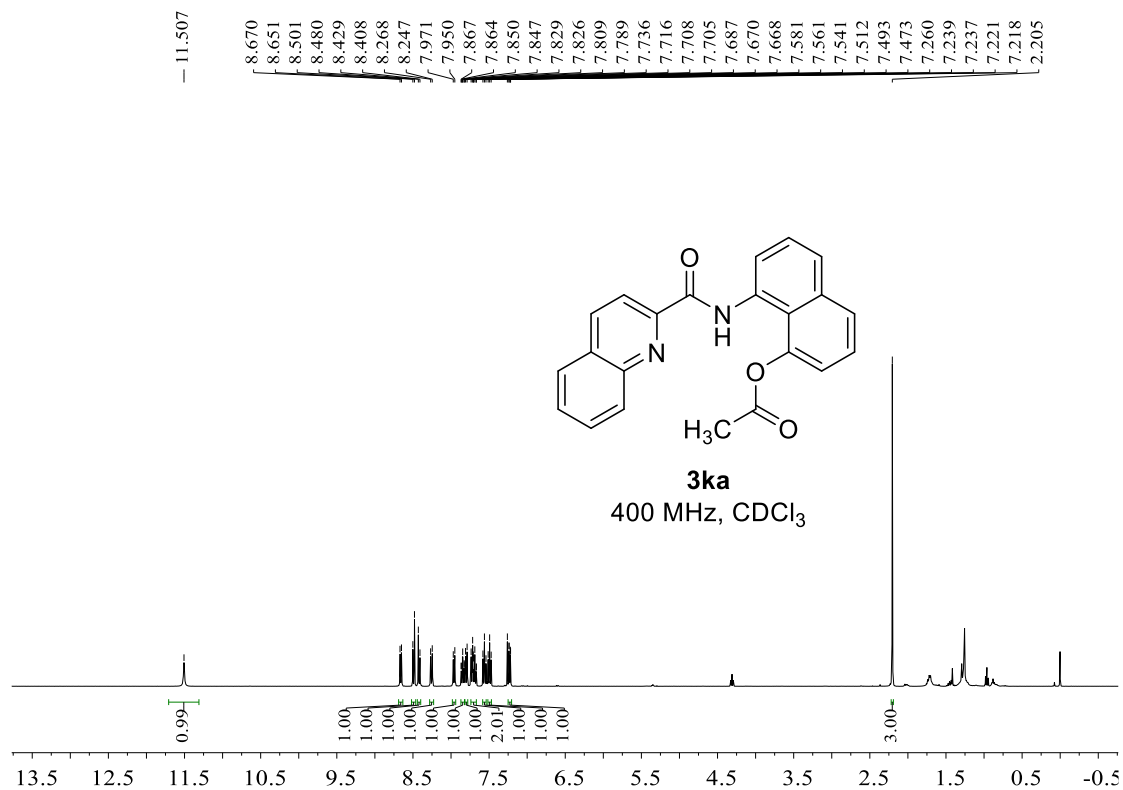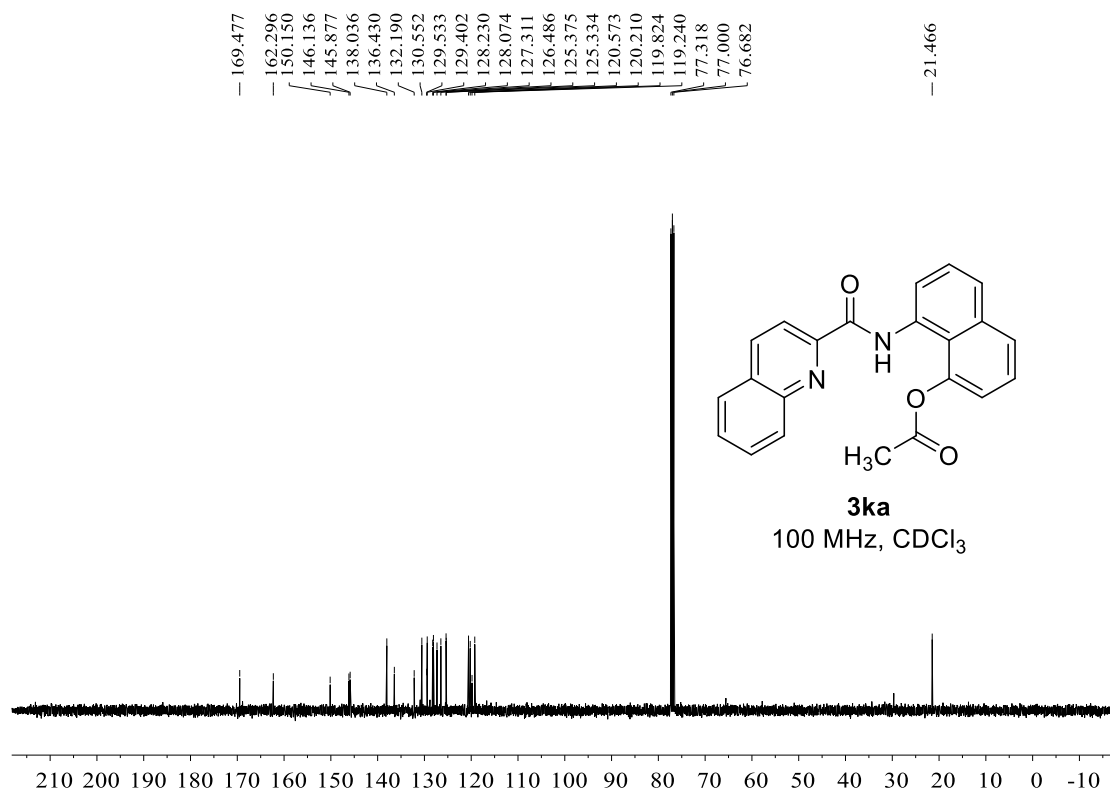

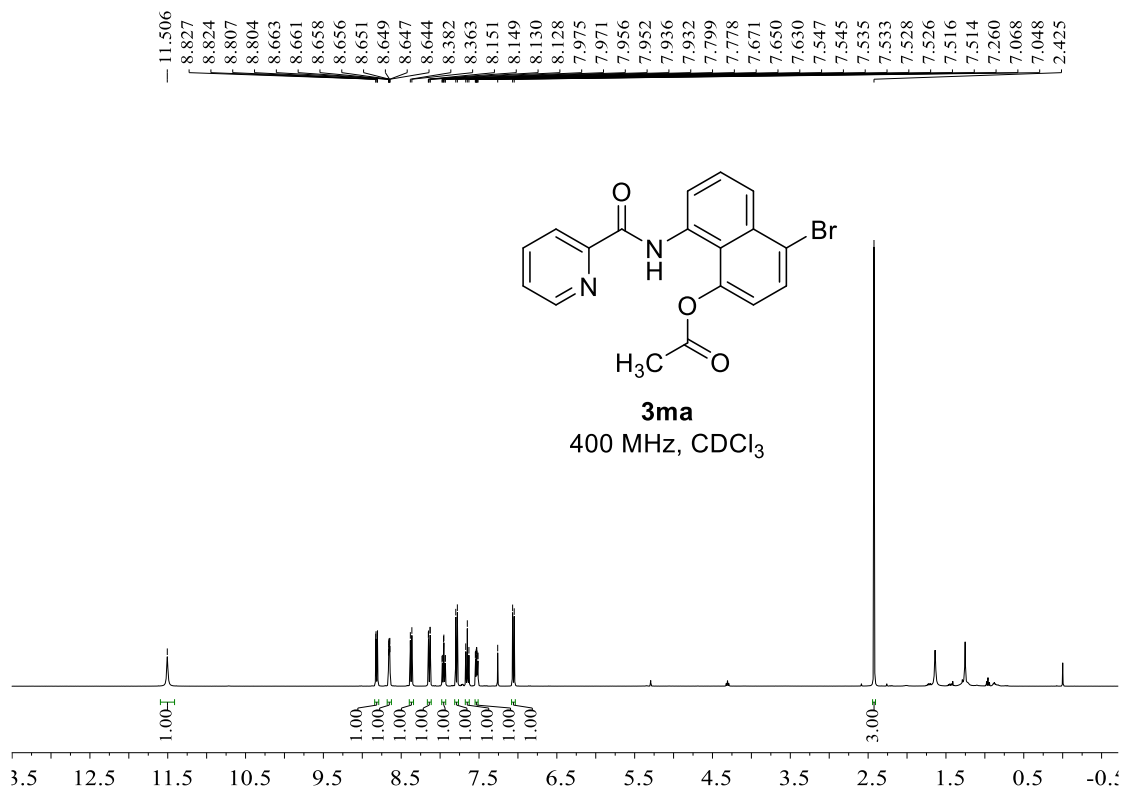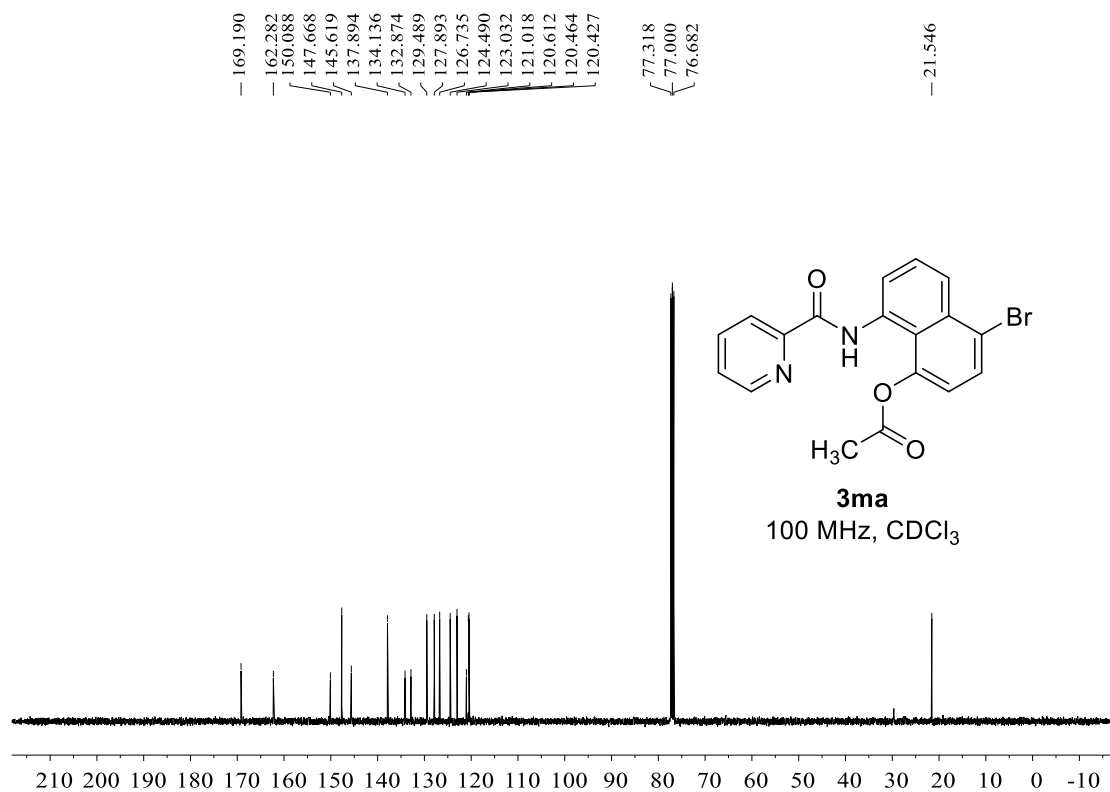

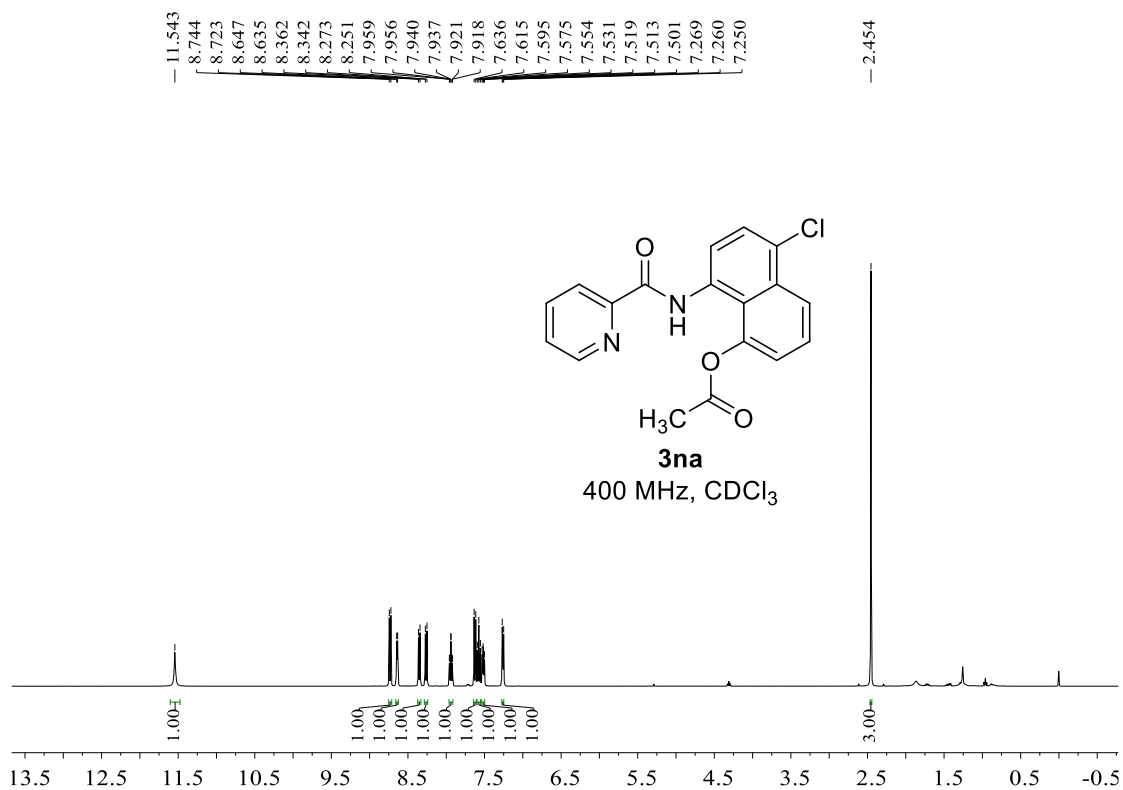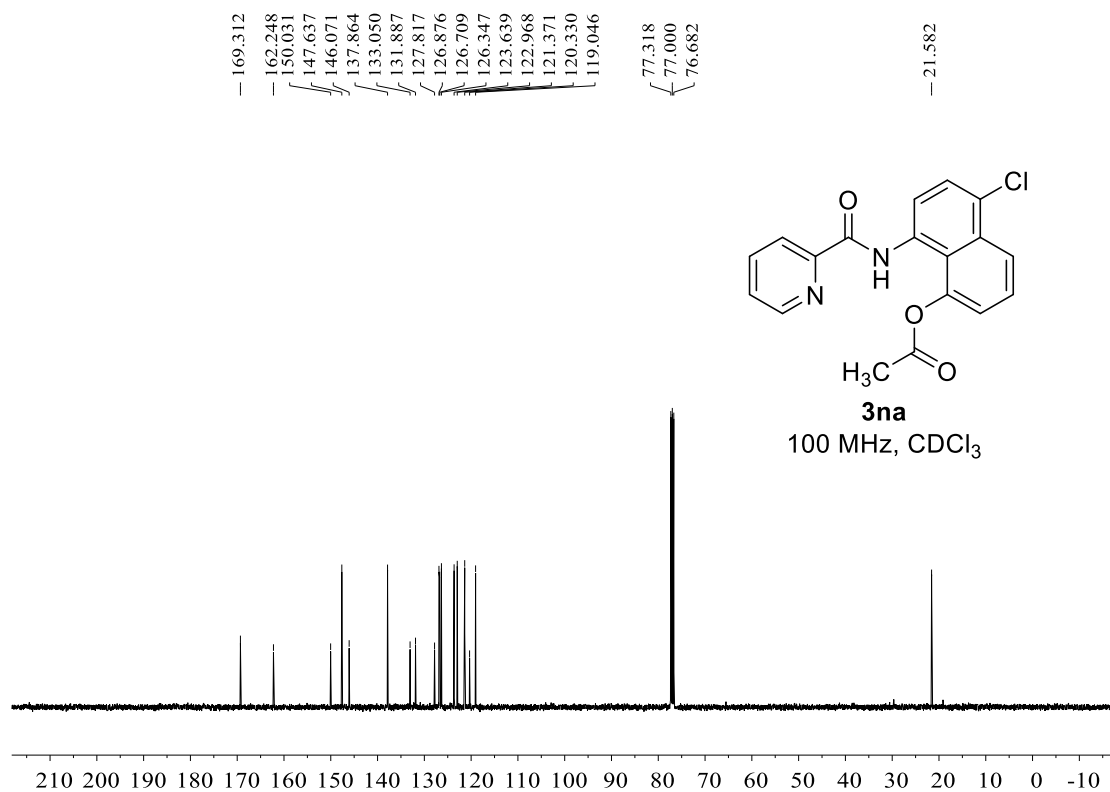

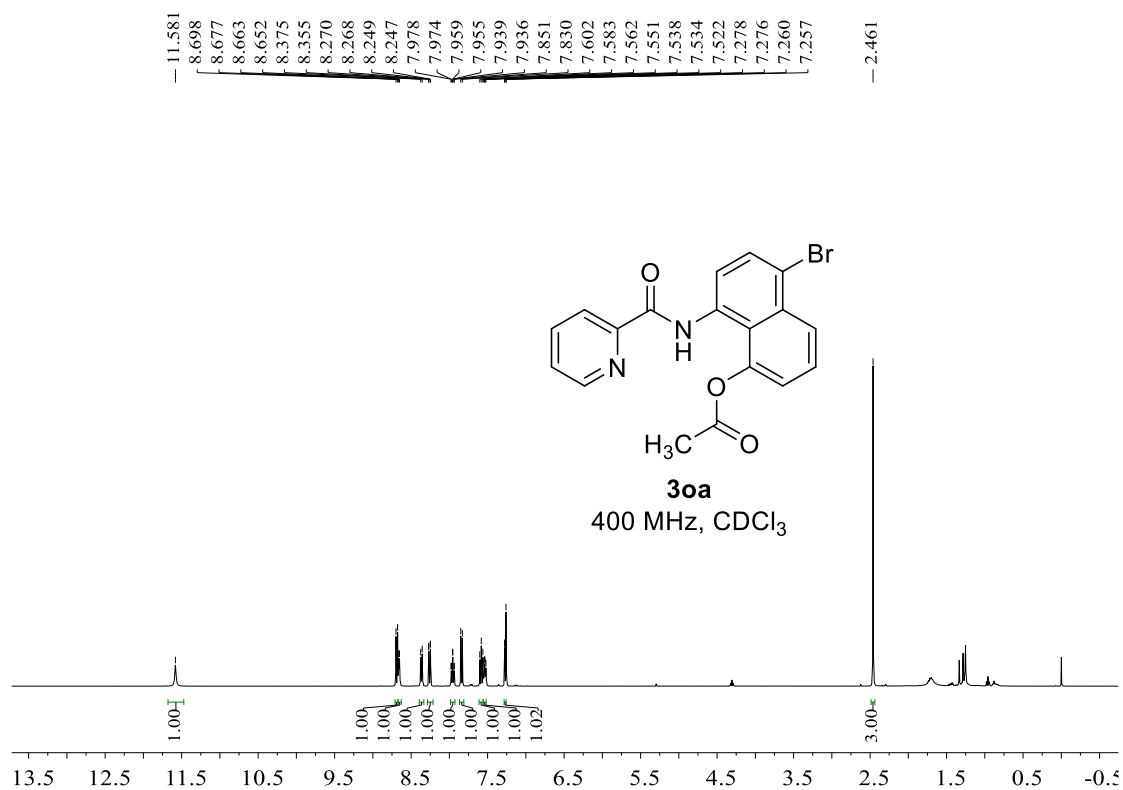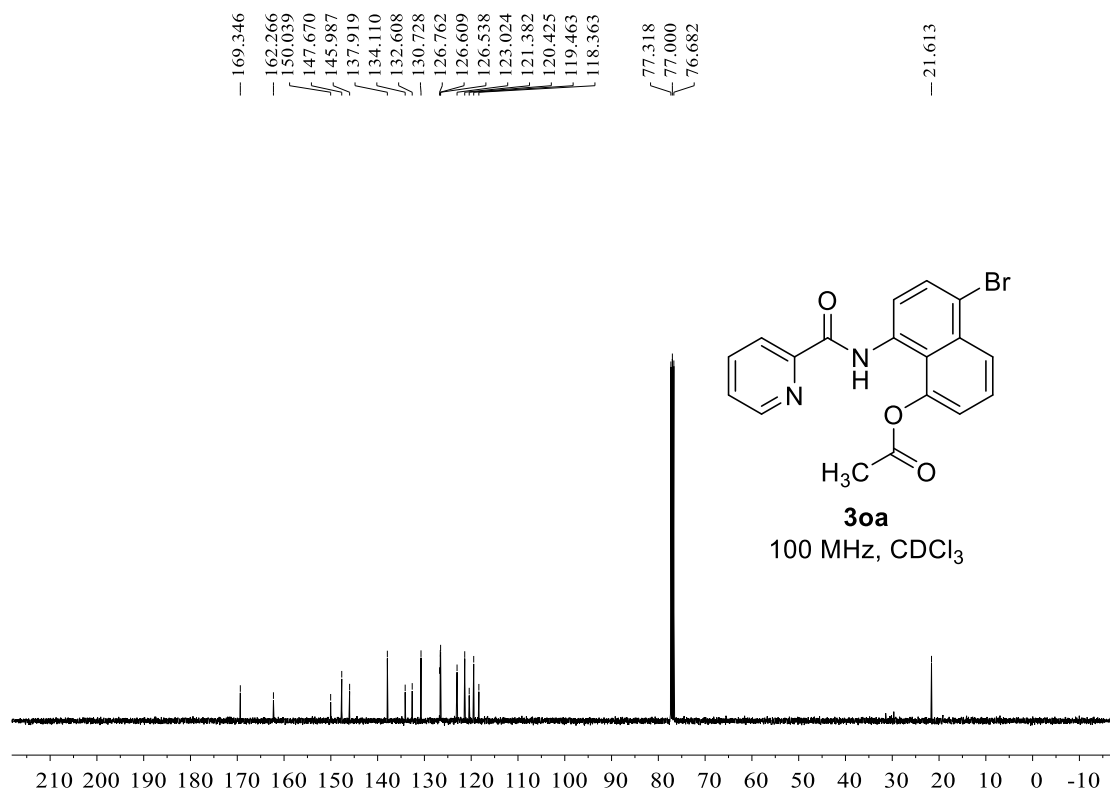

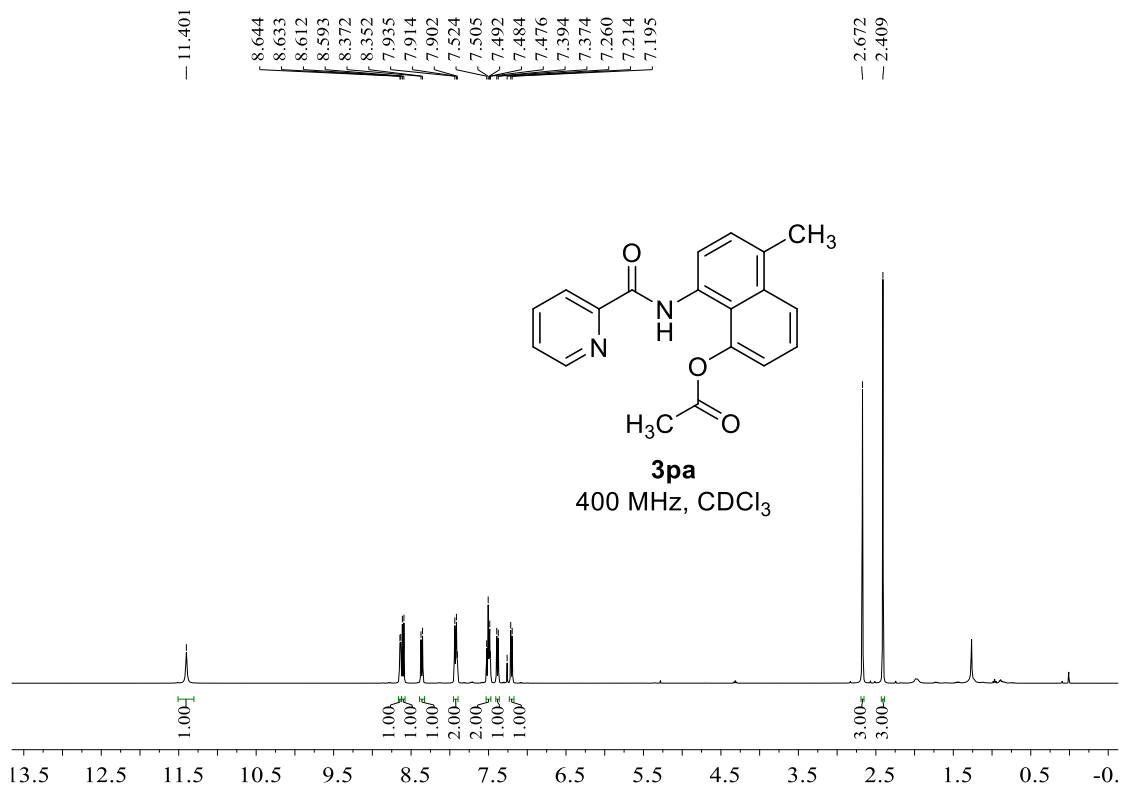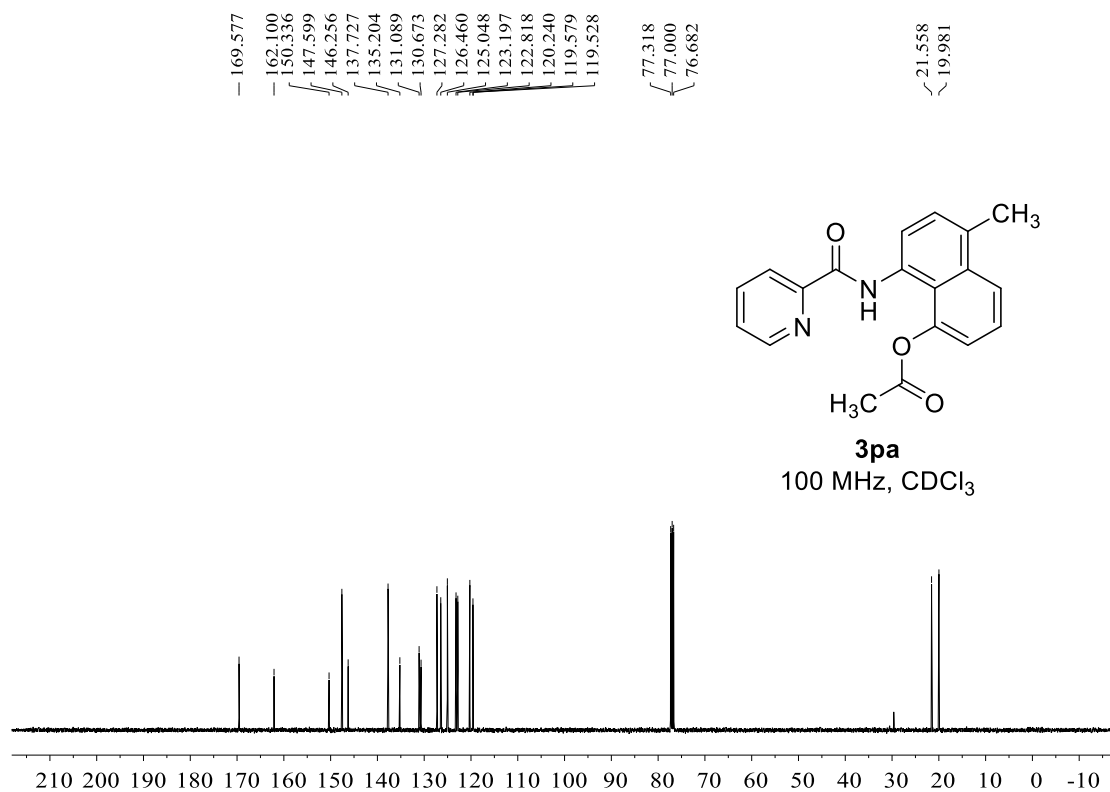

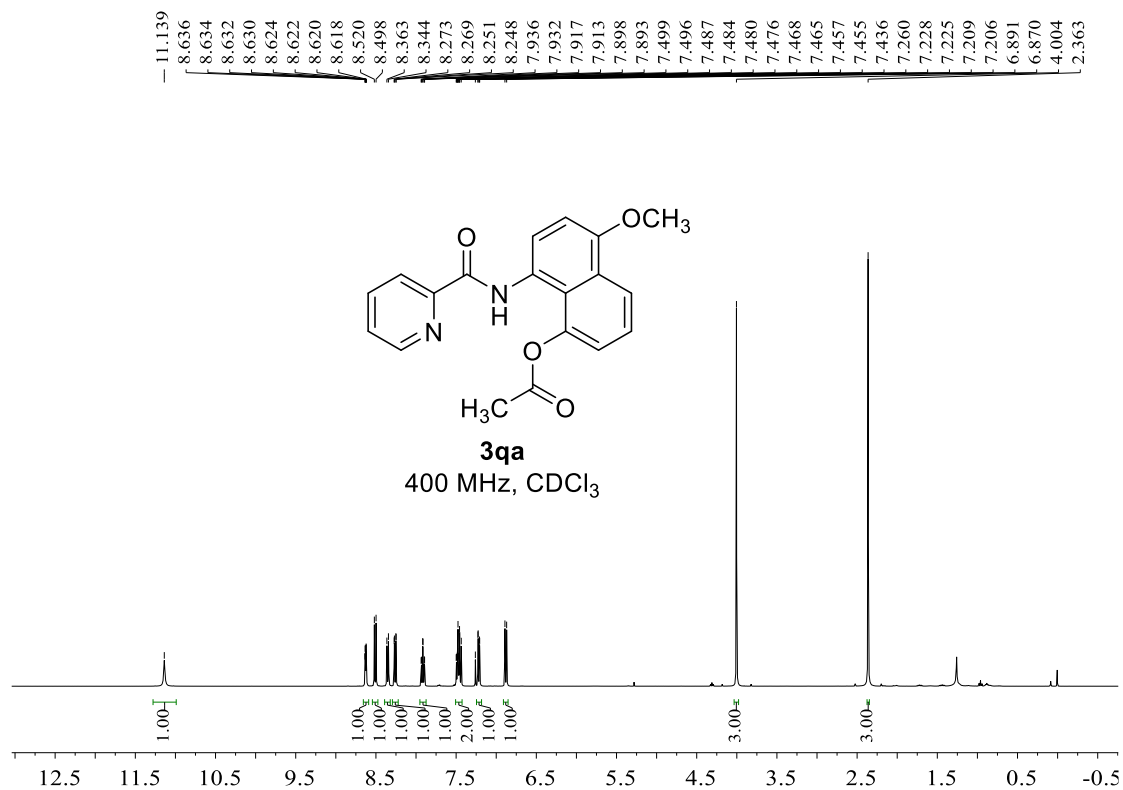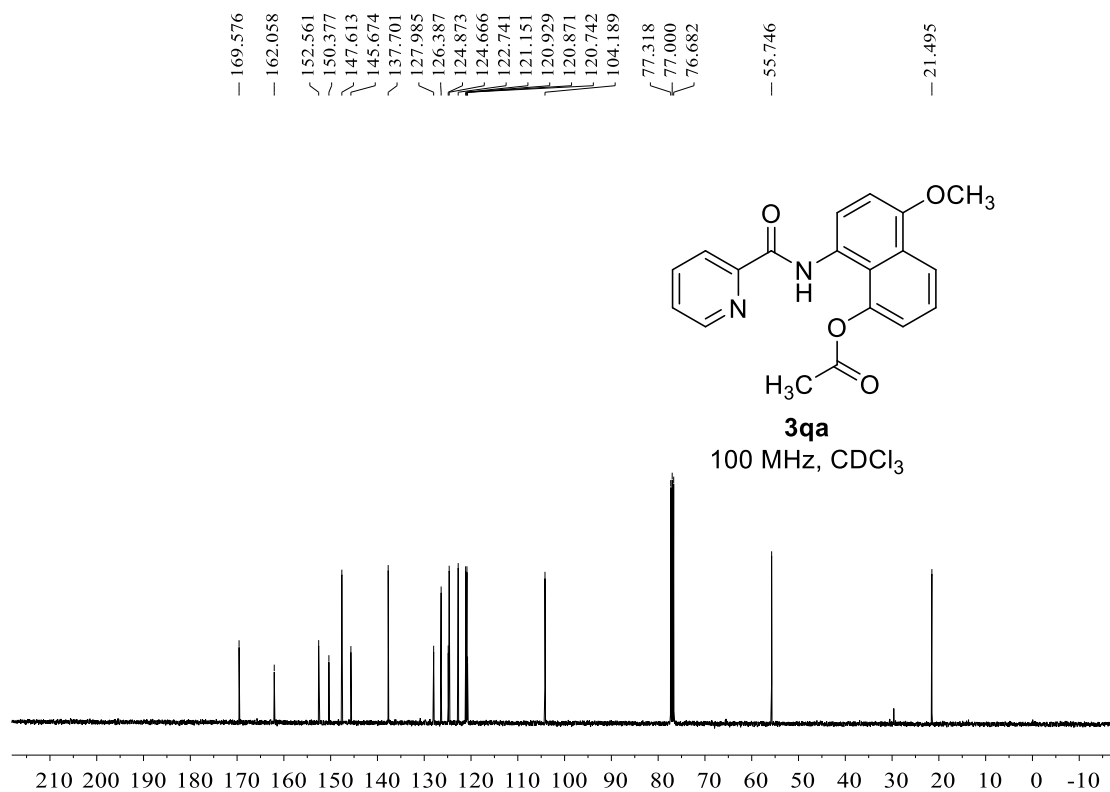



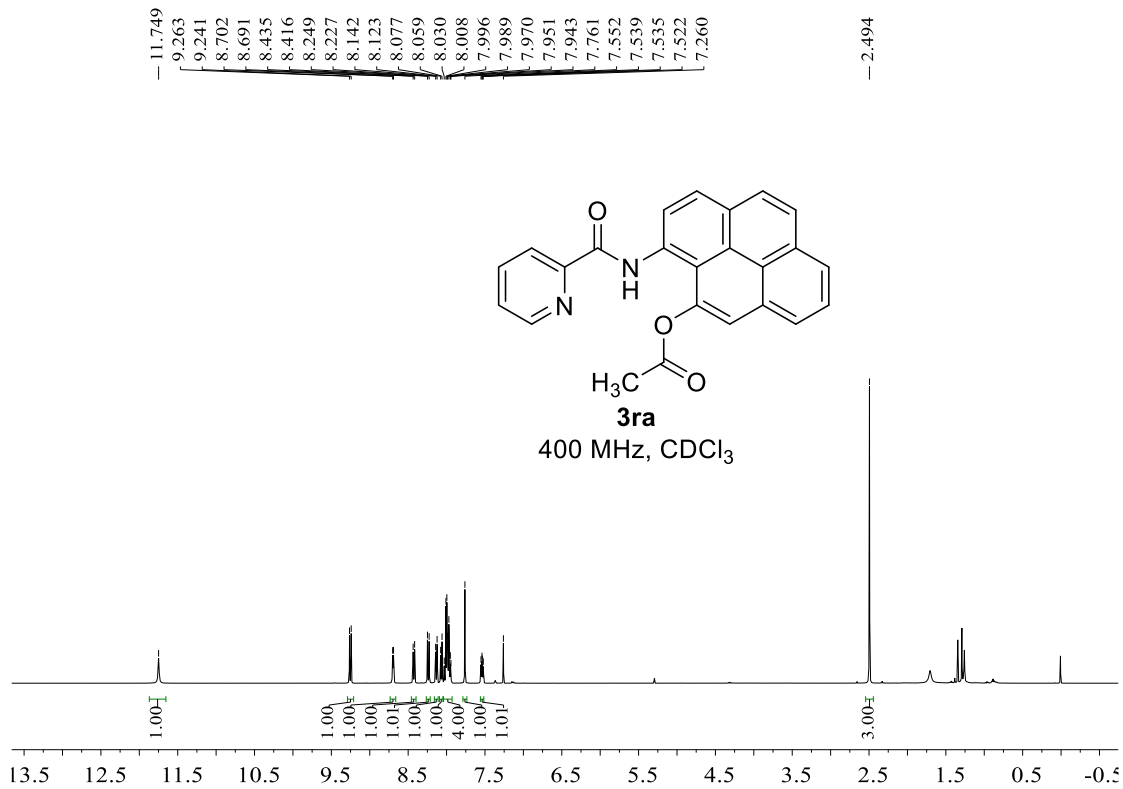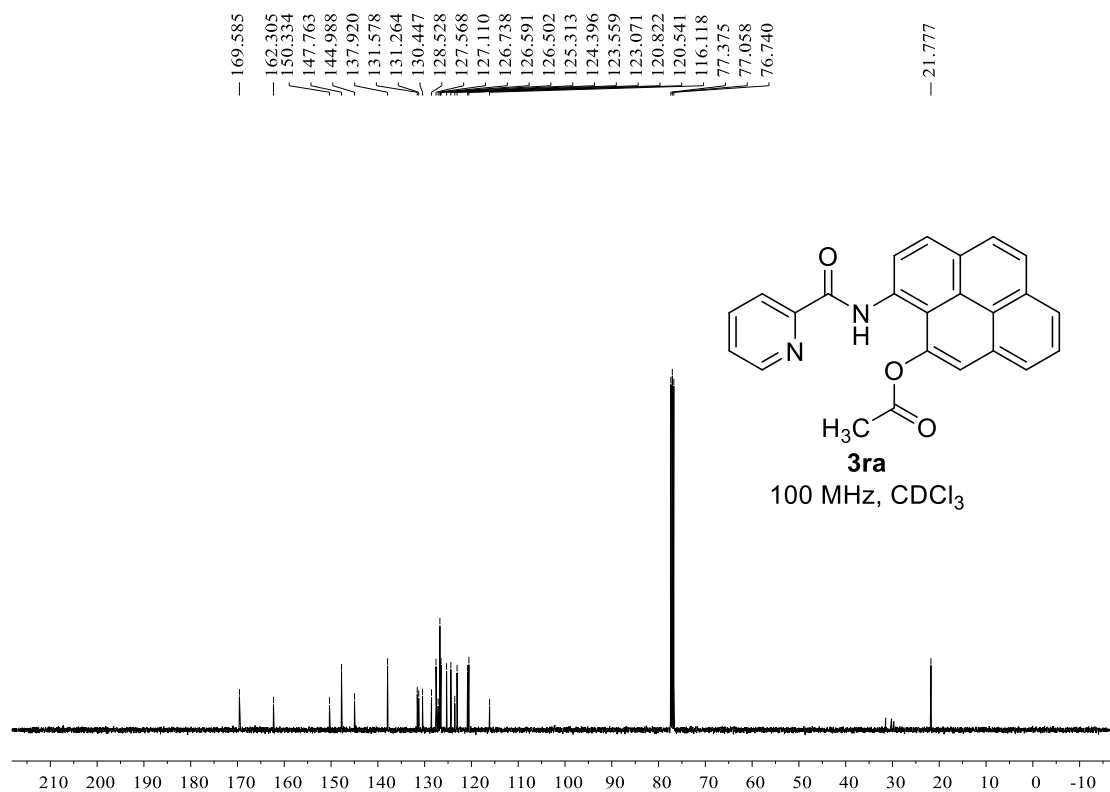

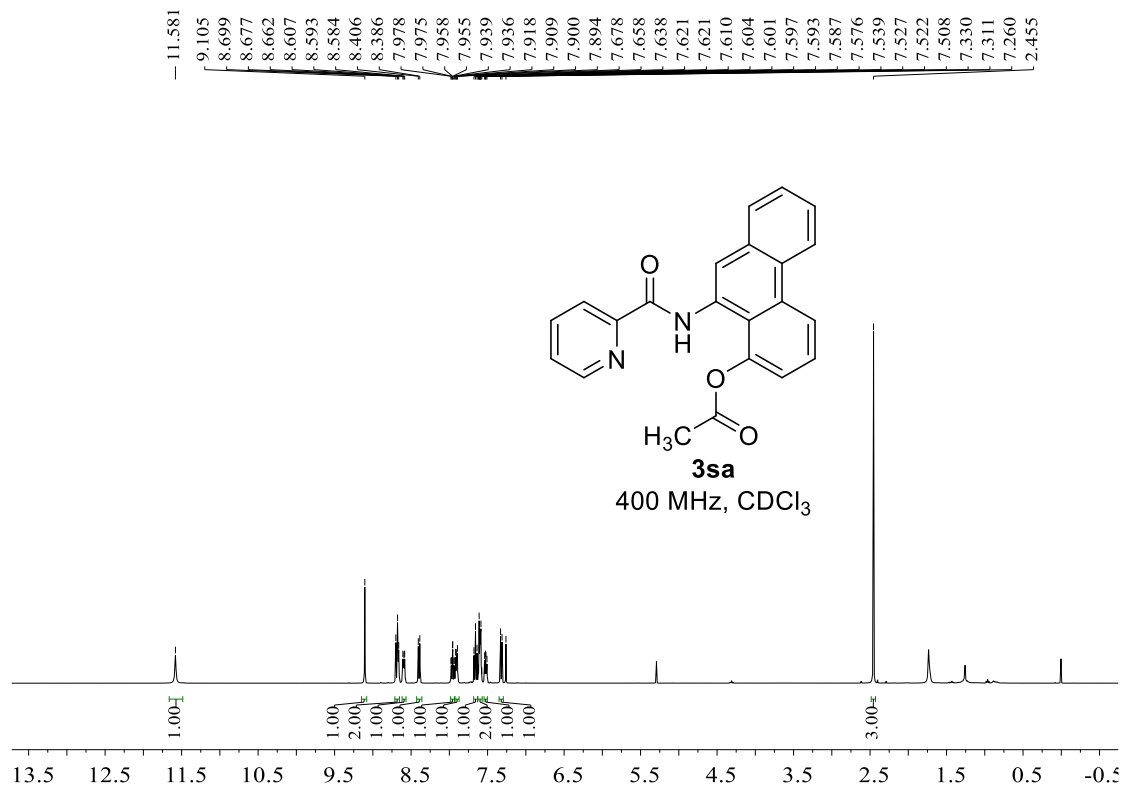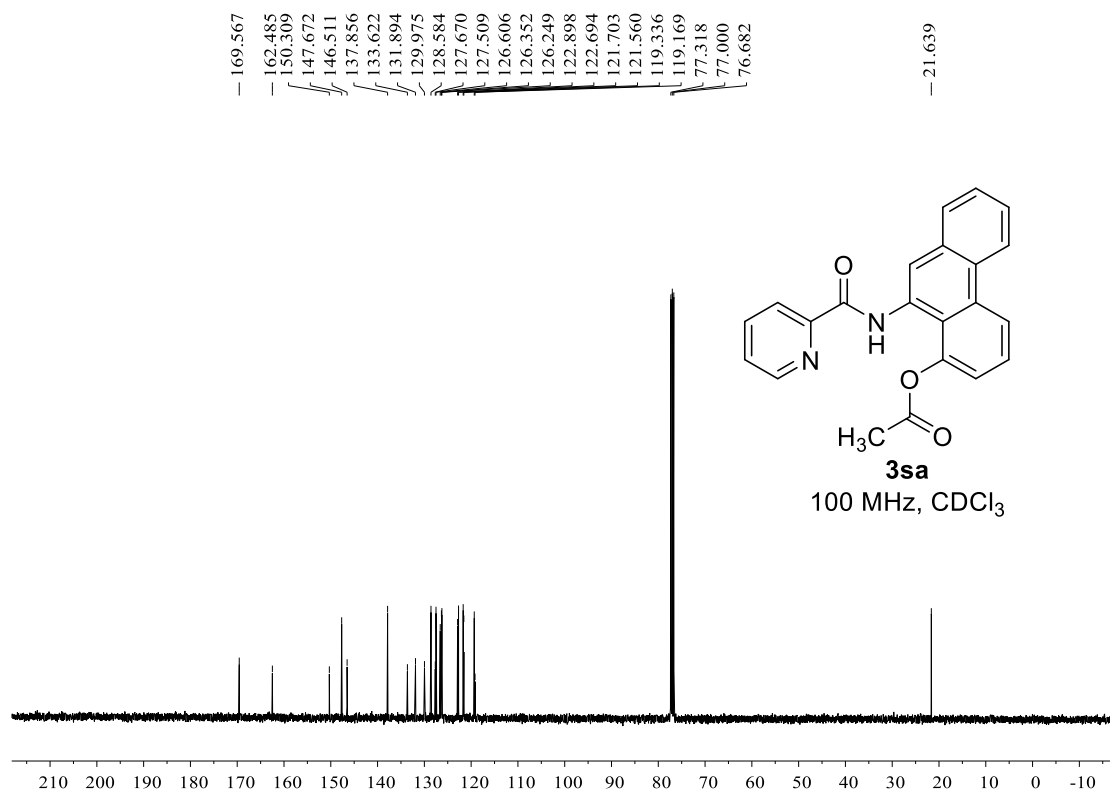

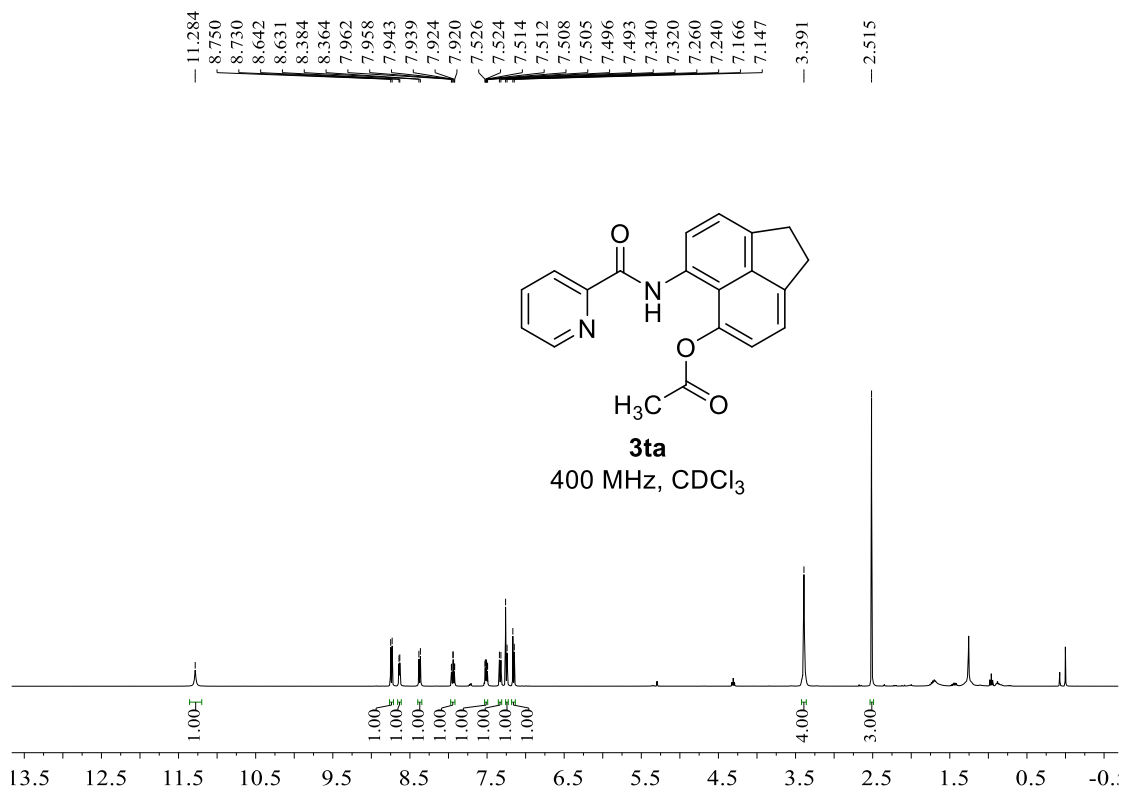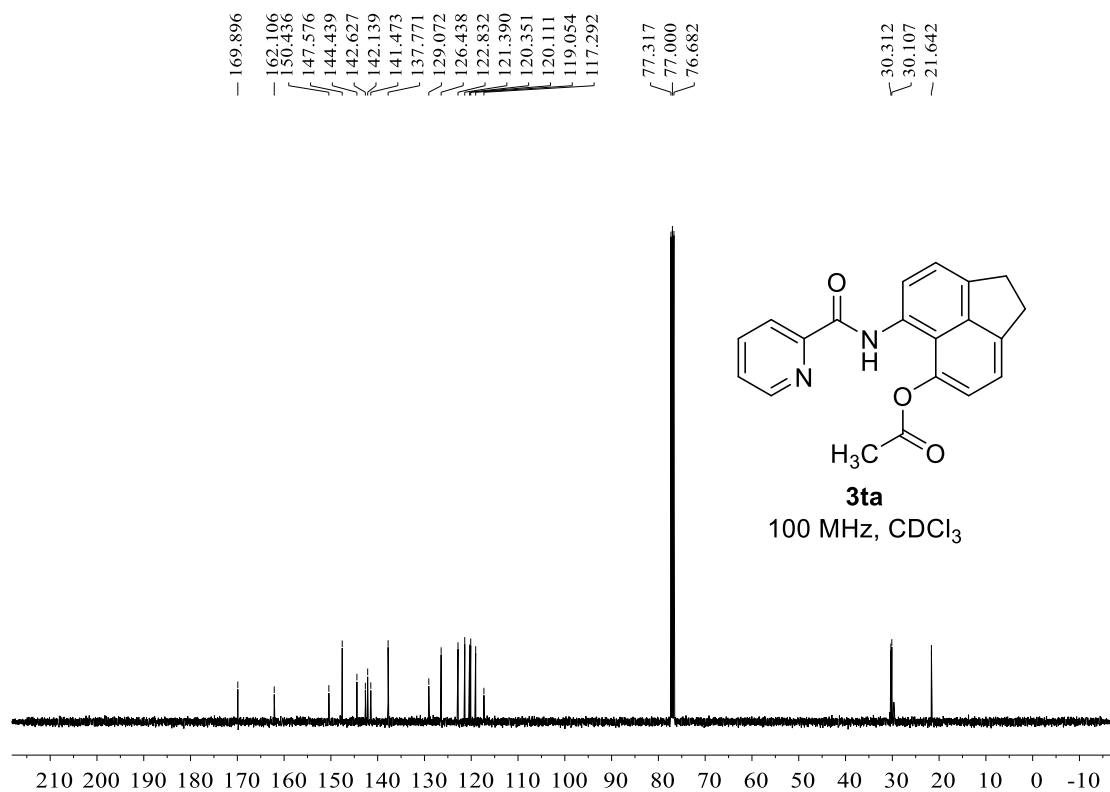

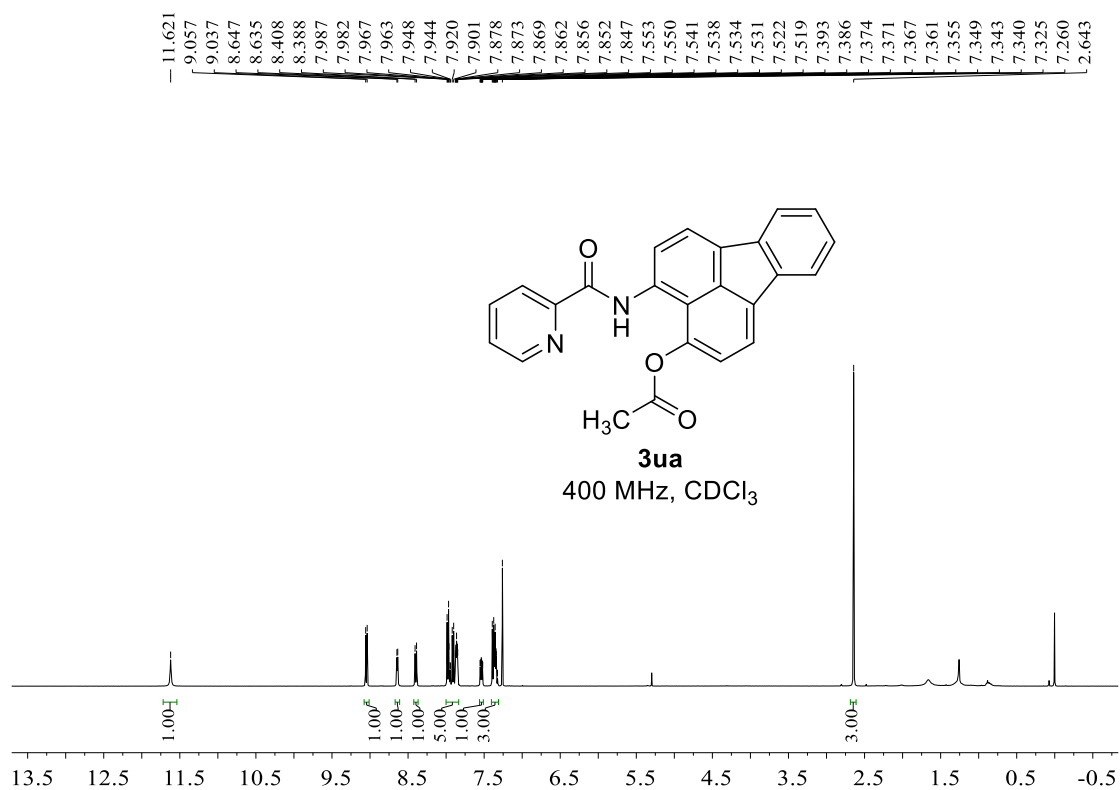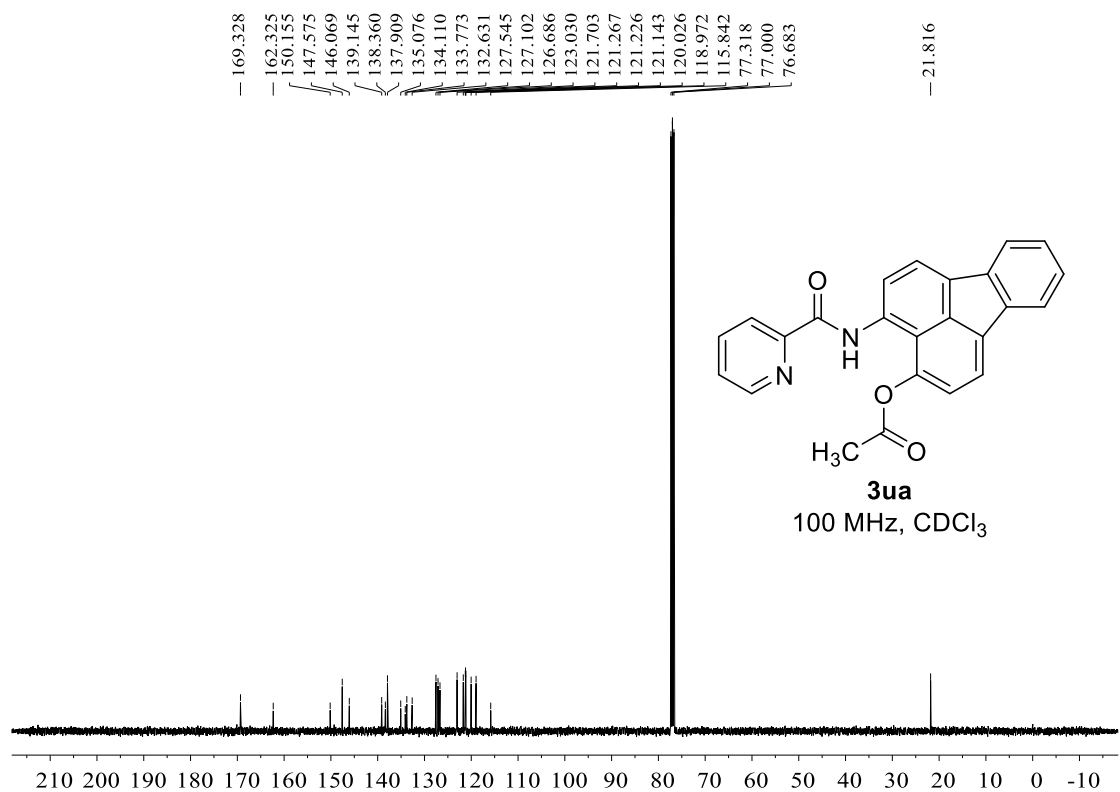

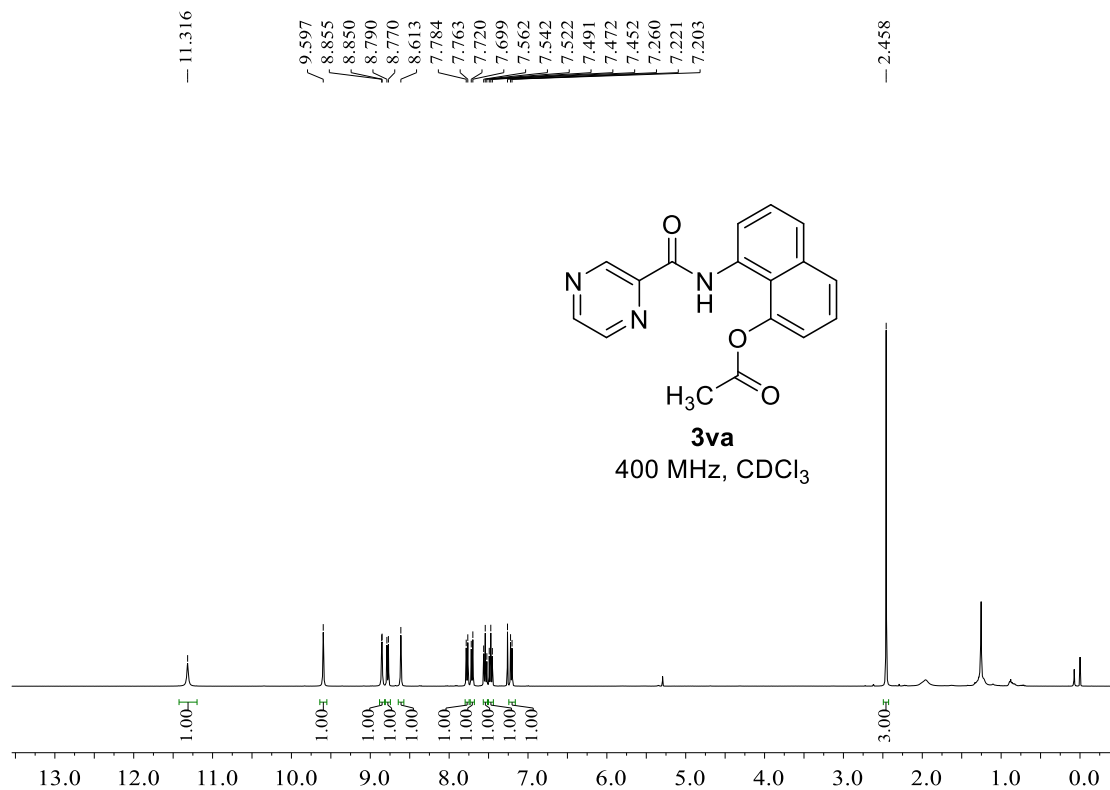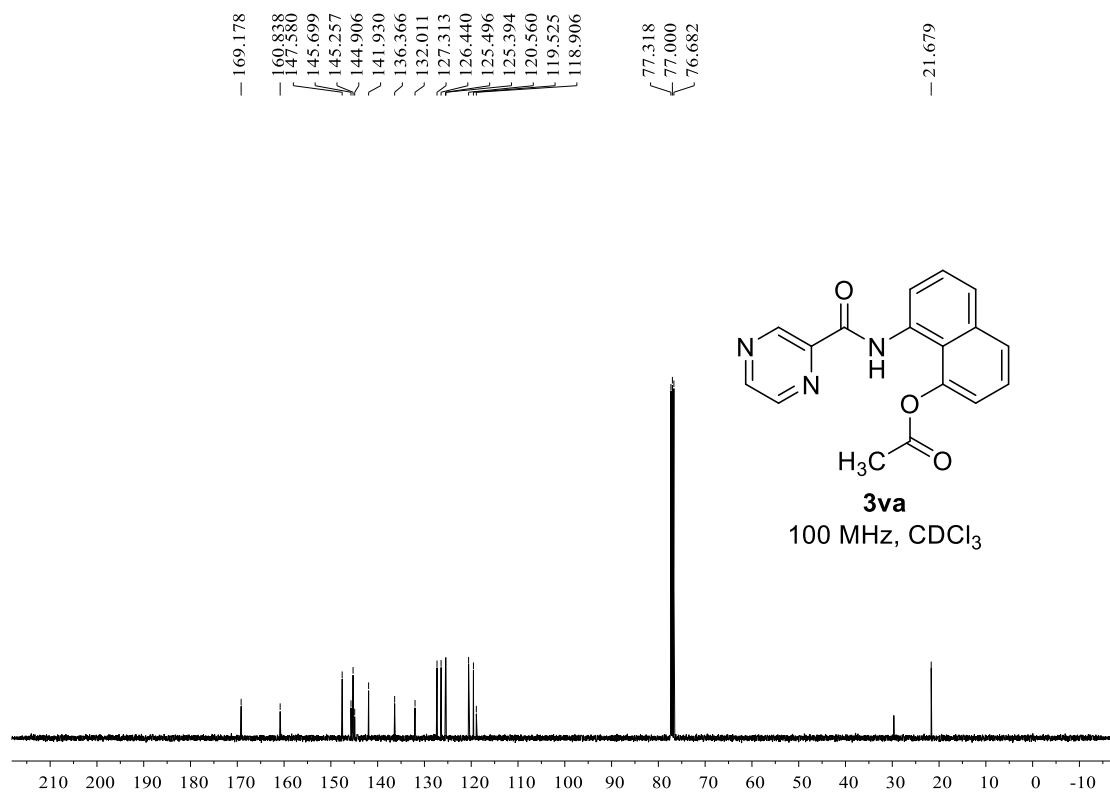

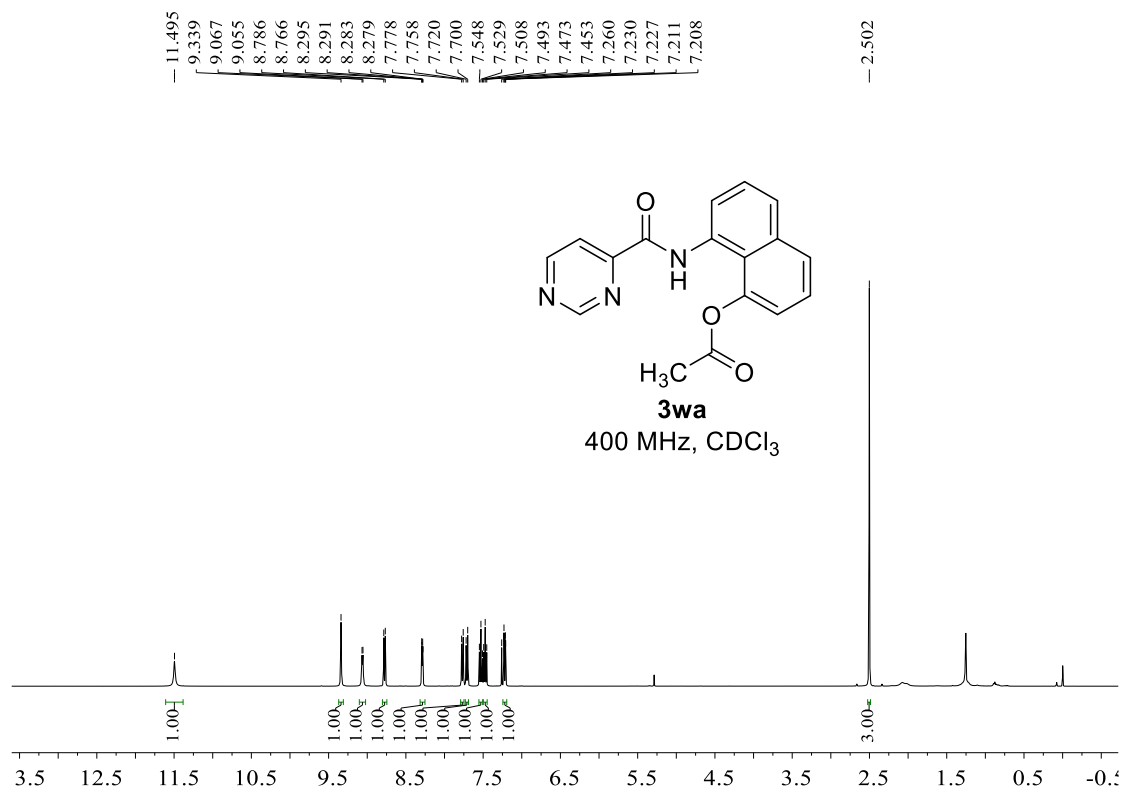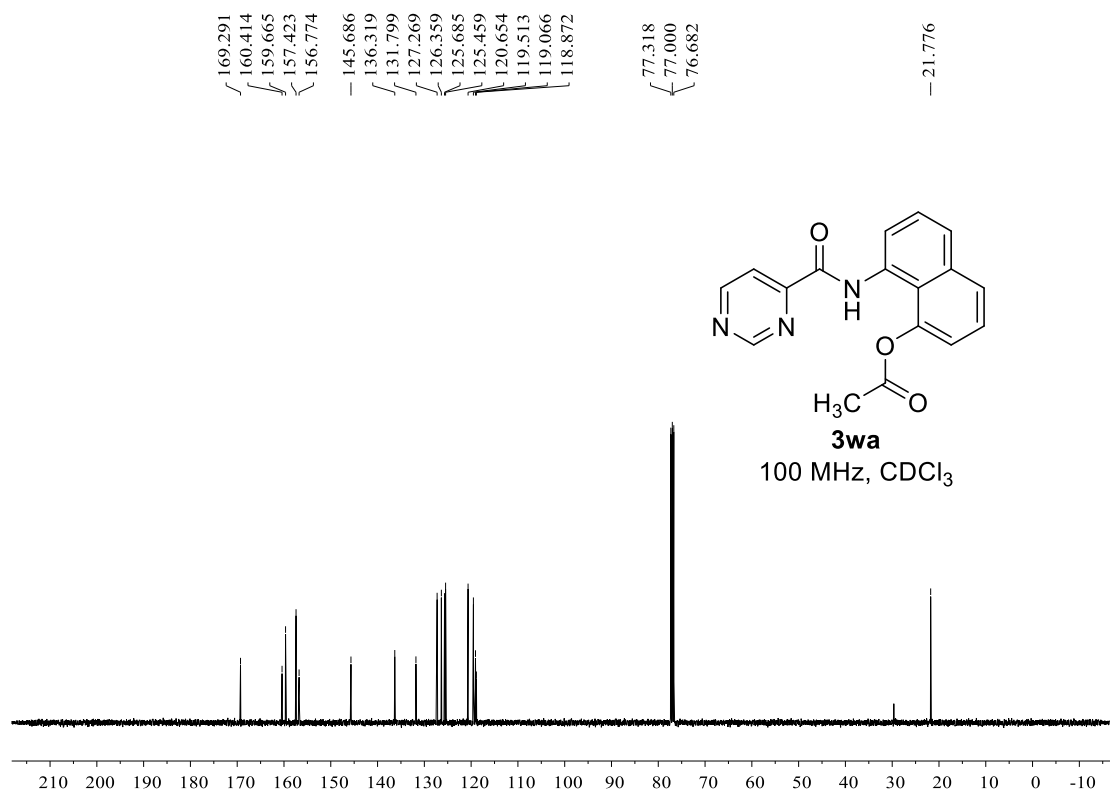

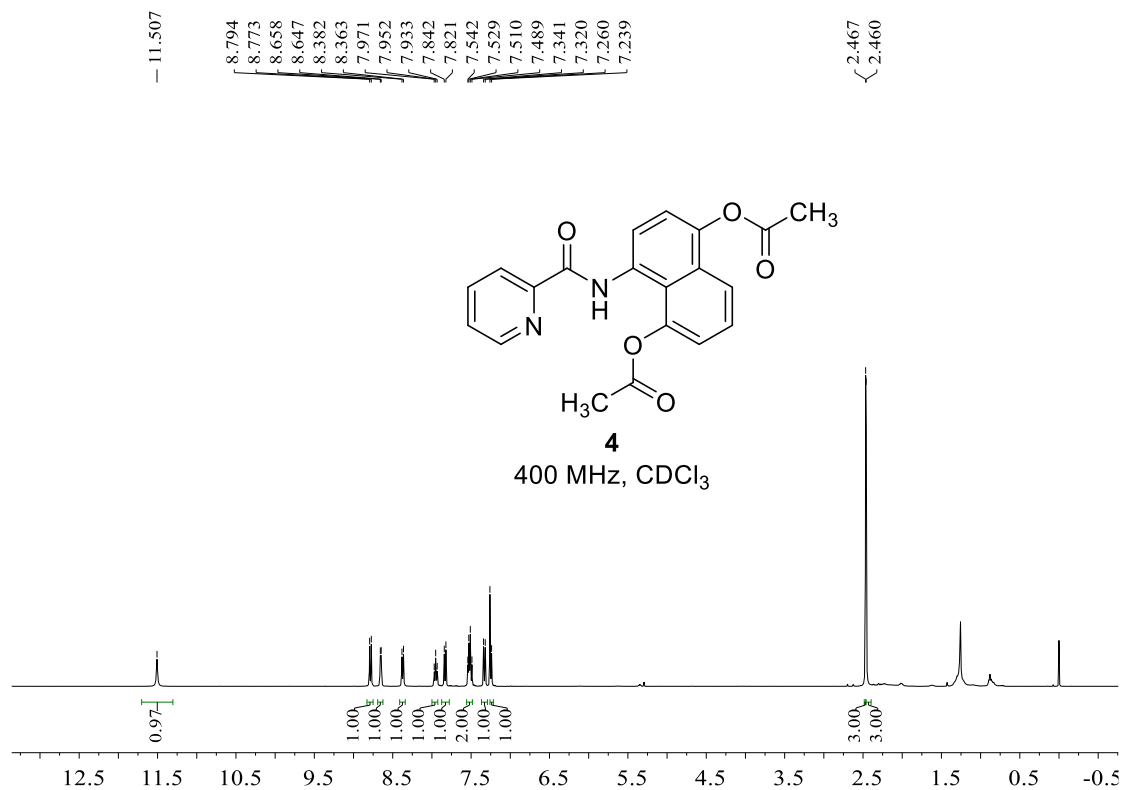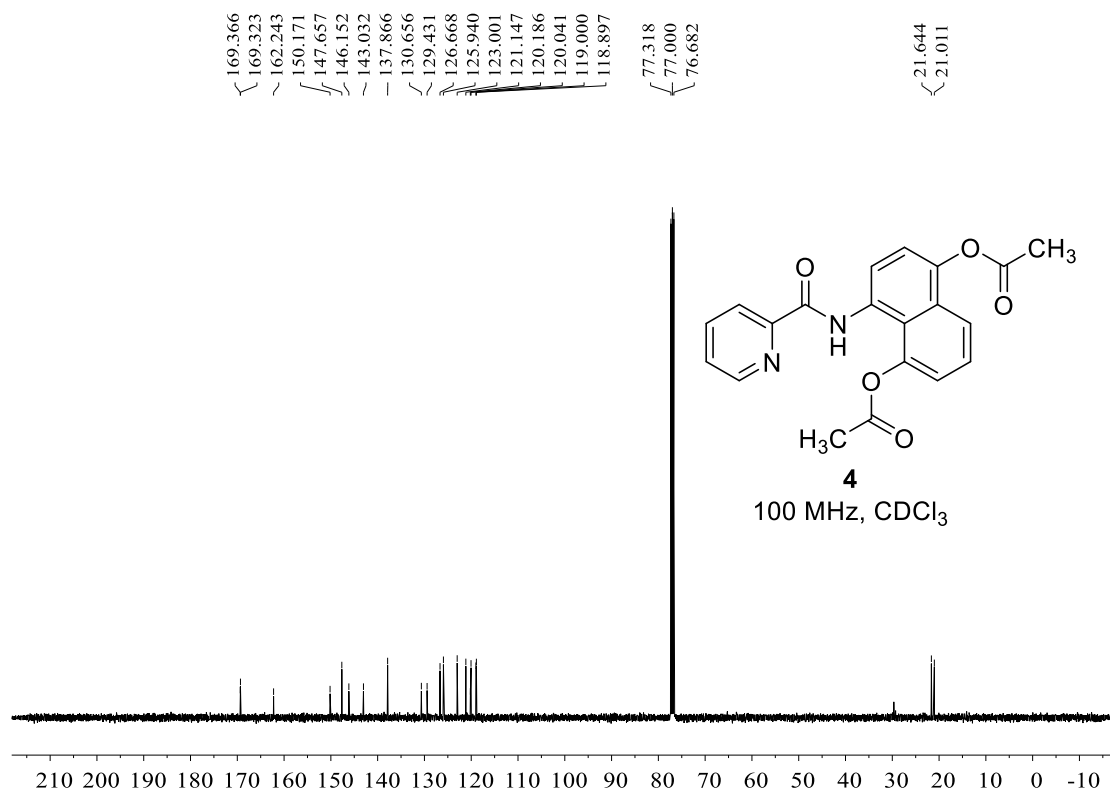





-60.585

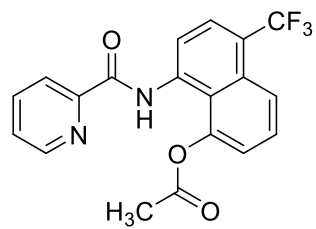

**5**  
376 MHz, CDCl<sub>3</sub>



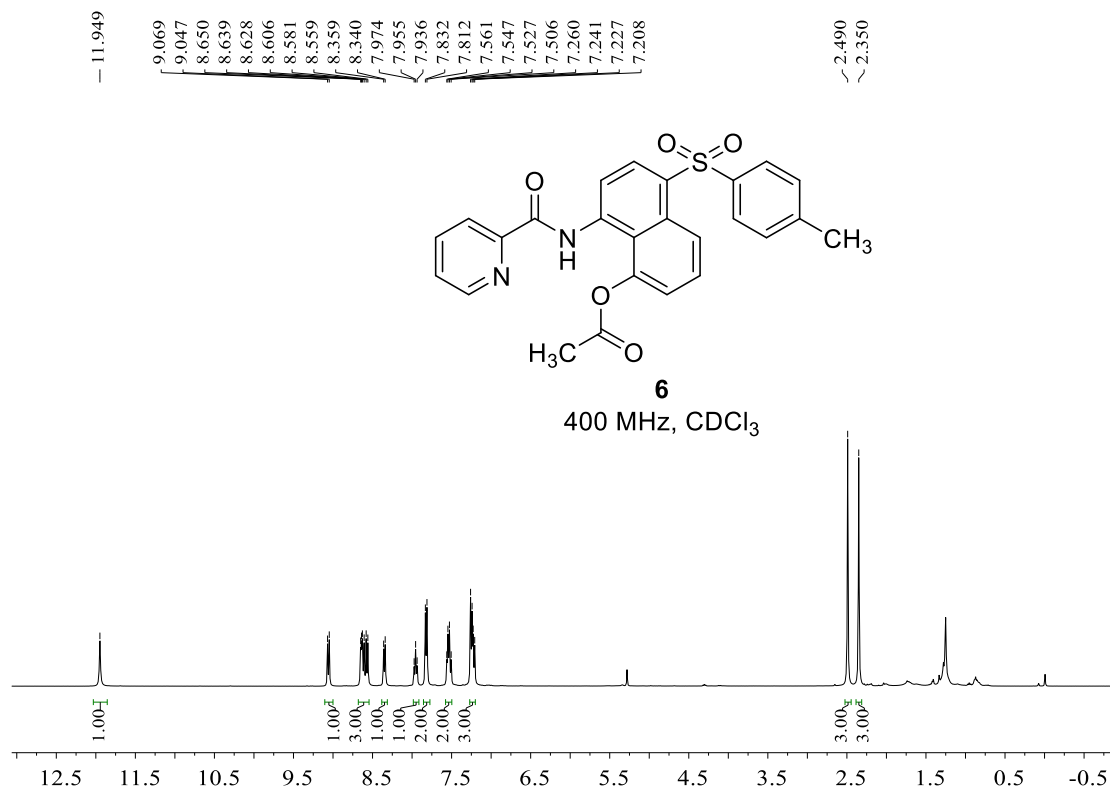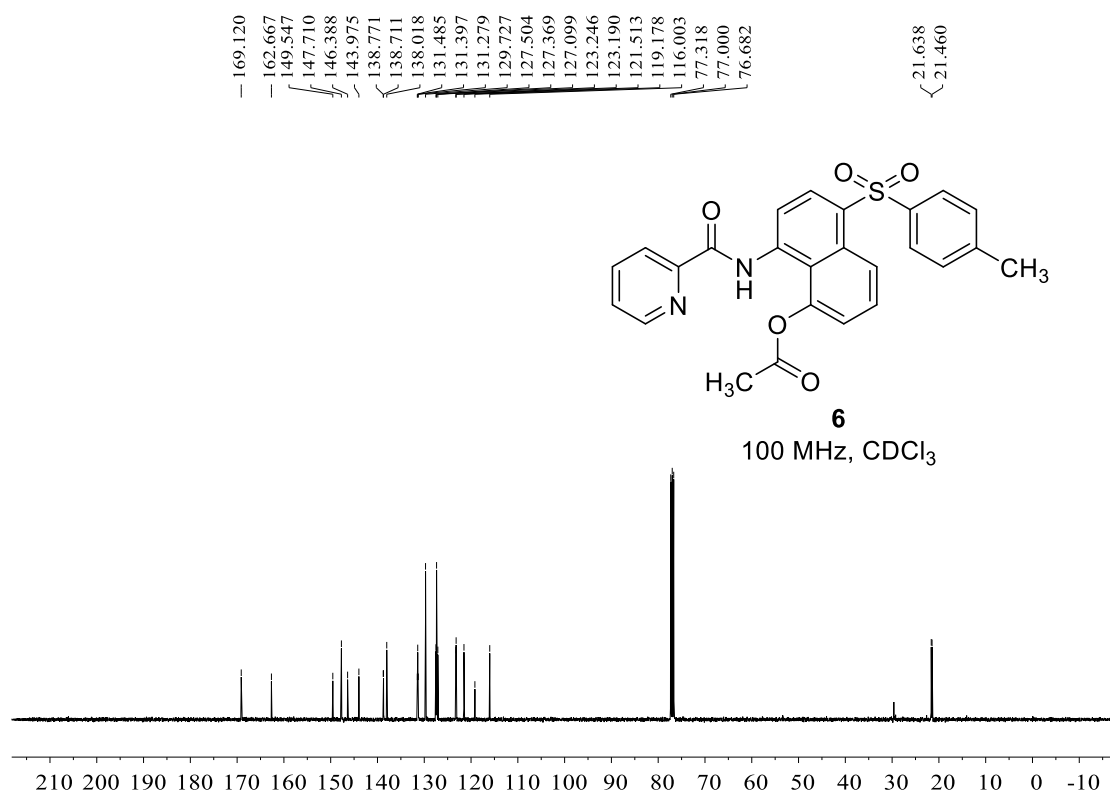

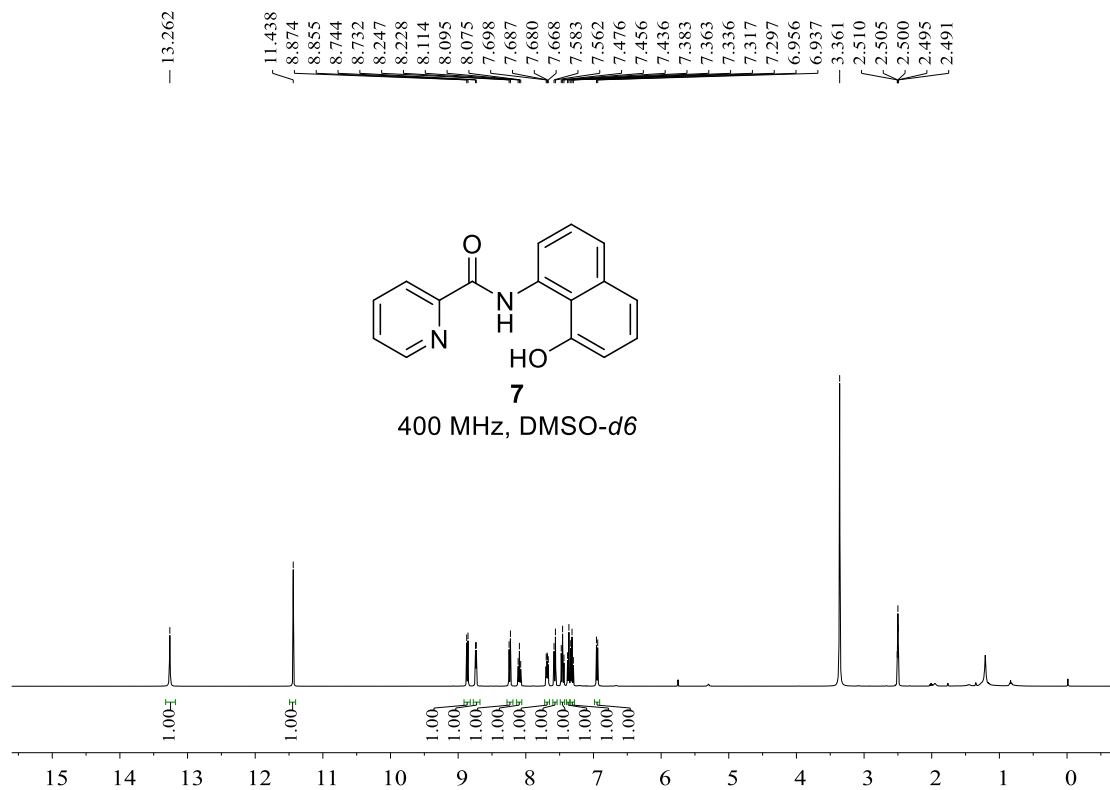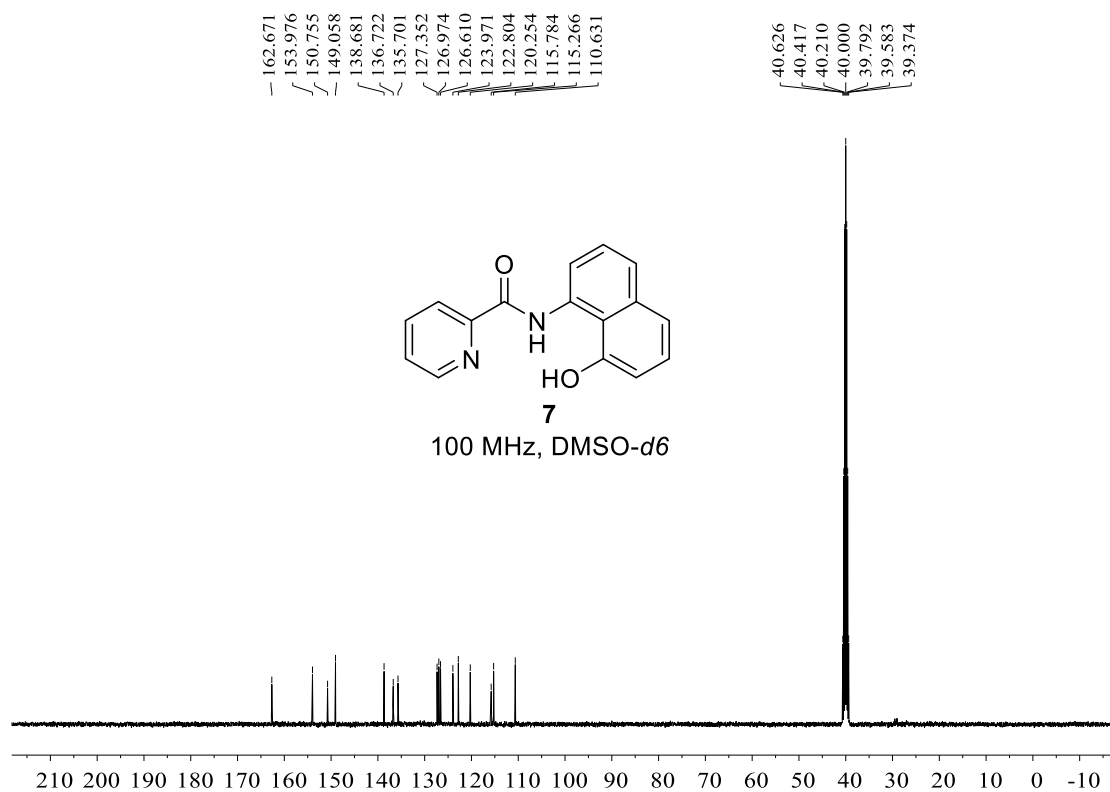

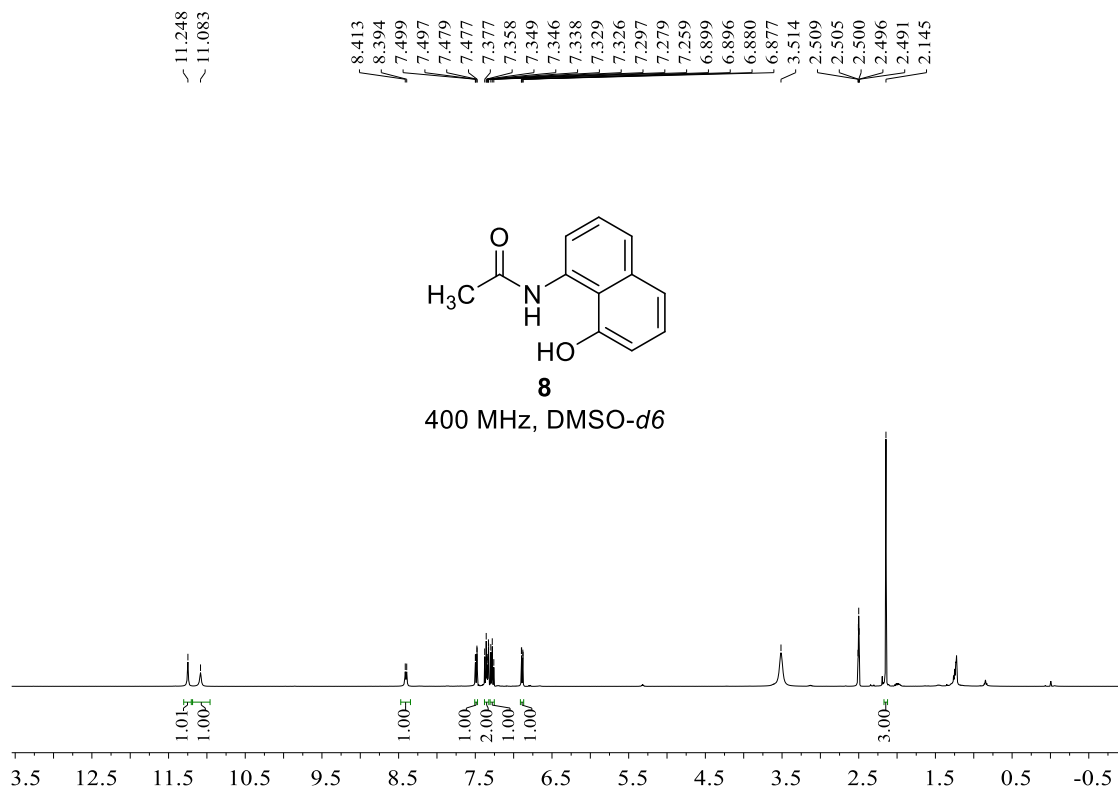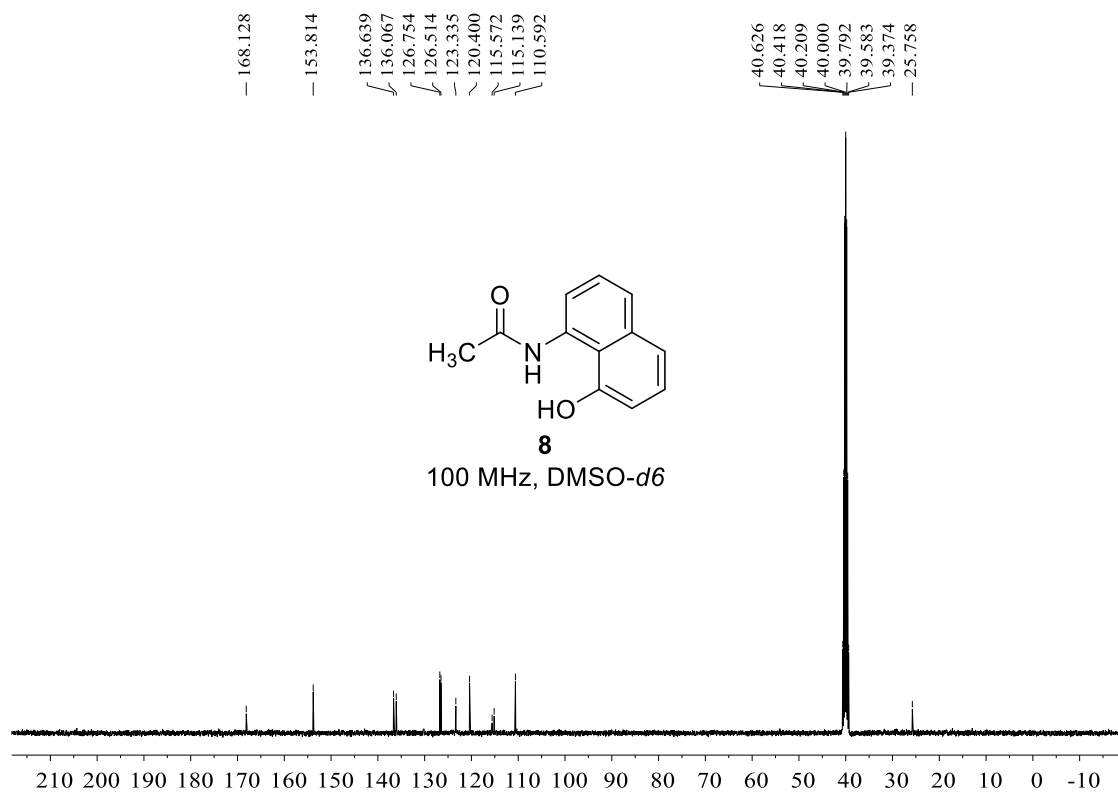

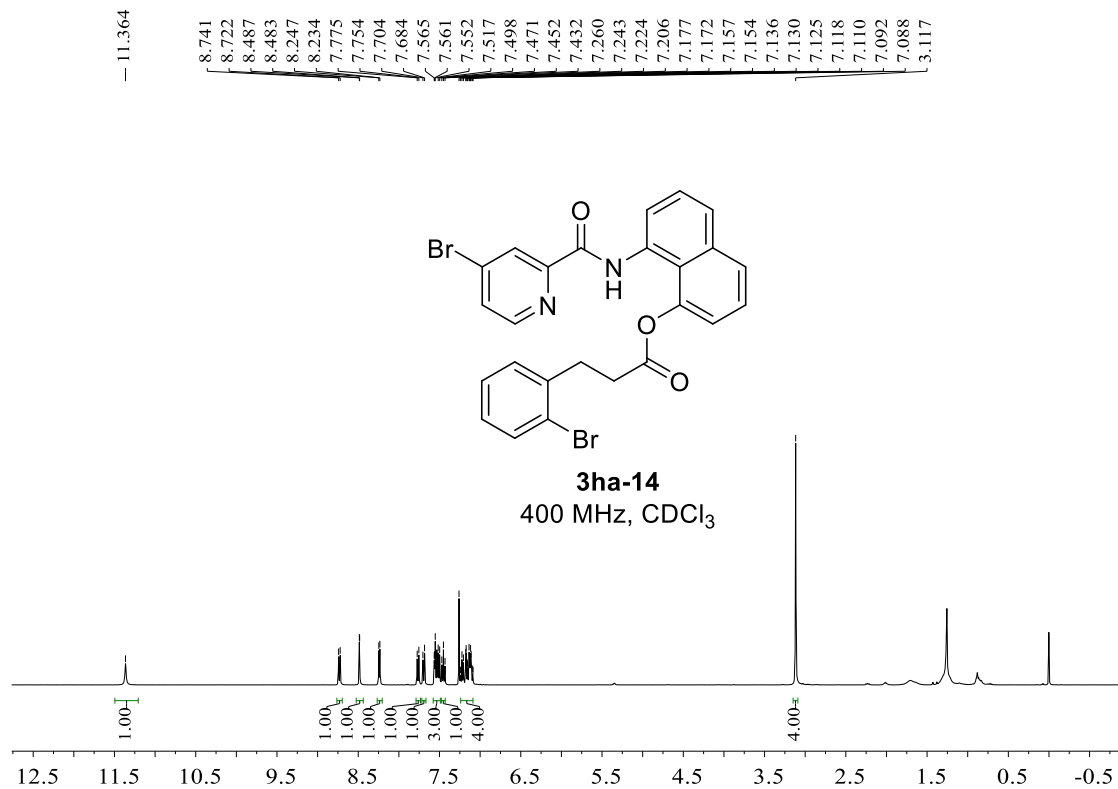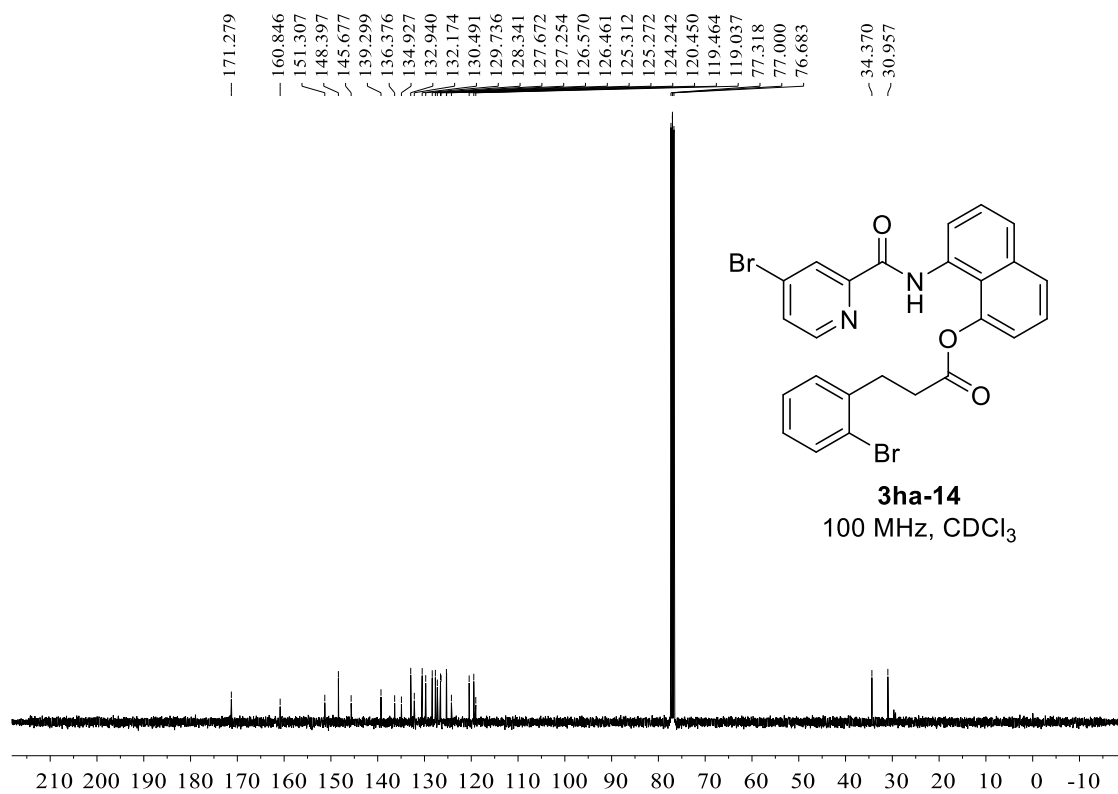

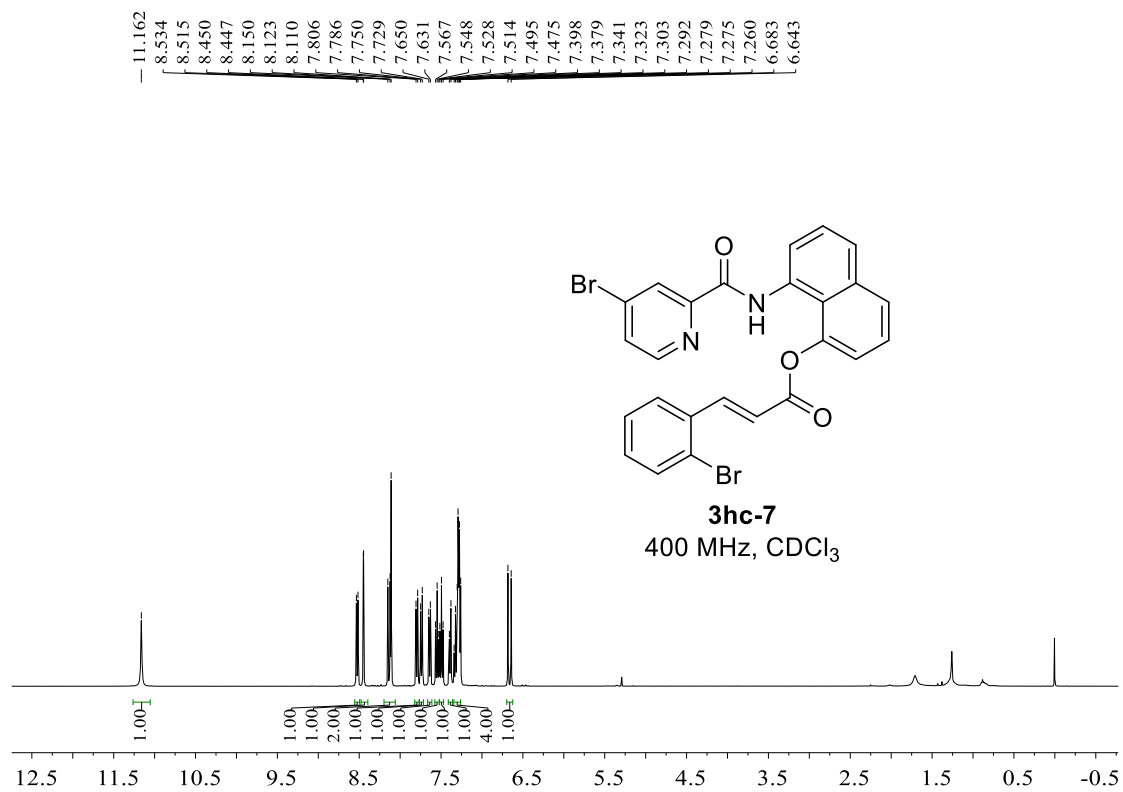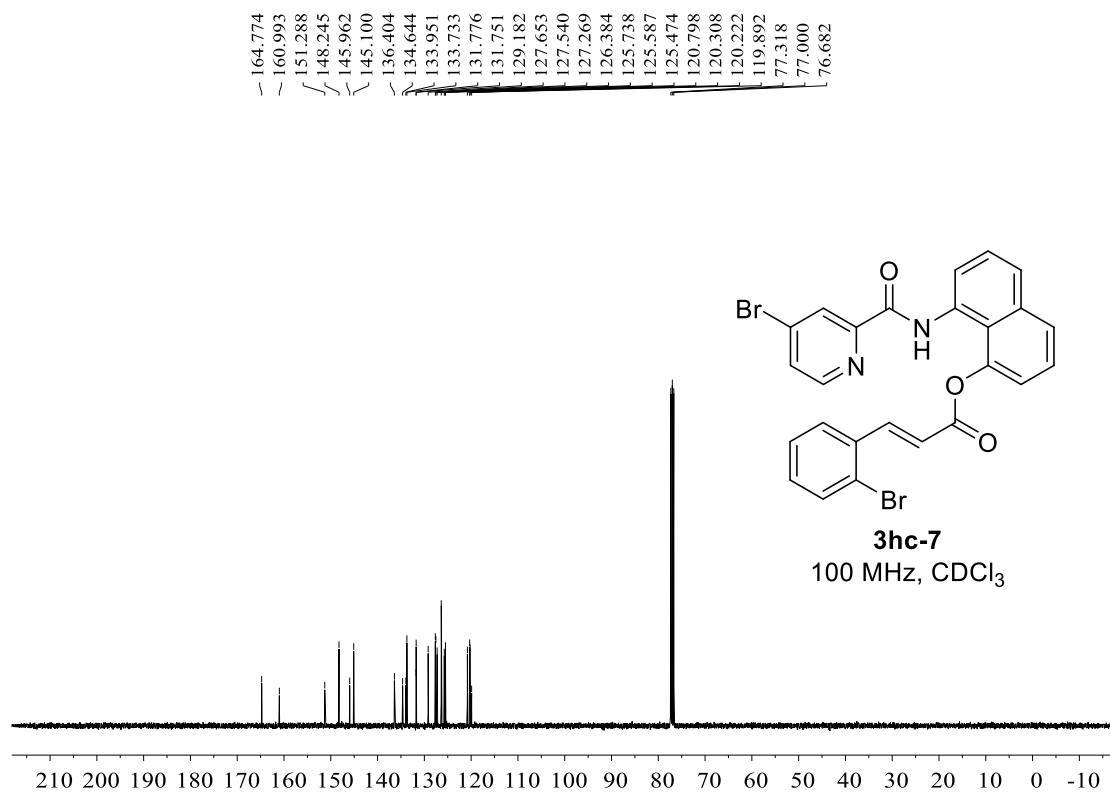

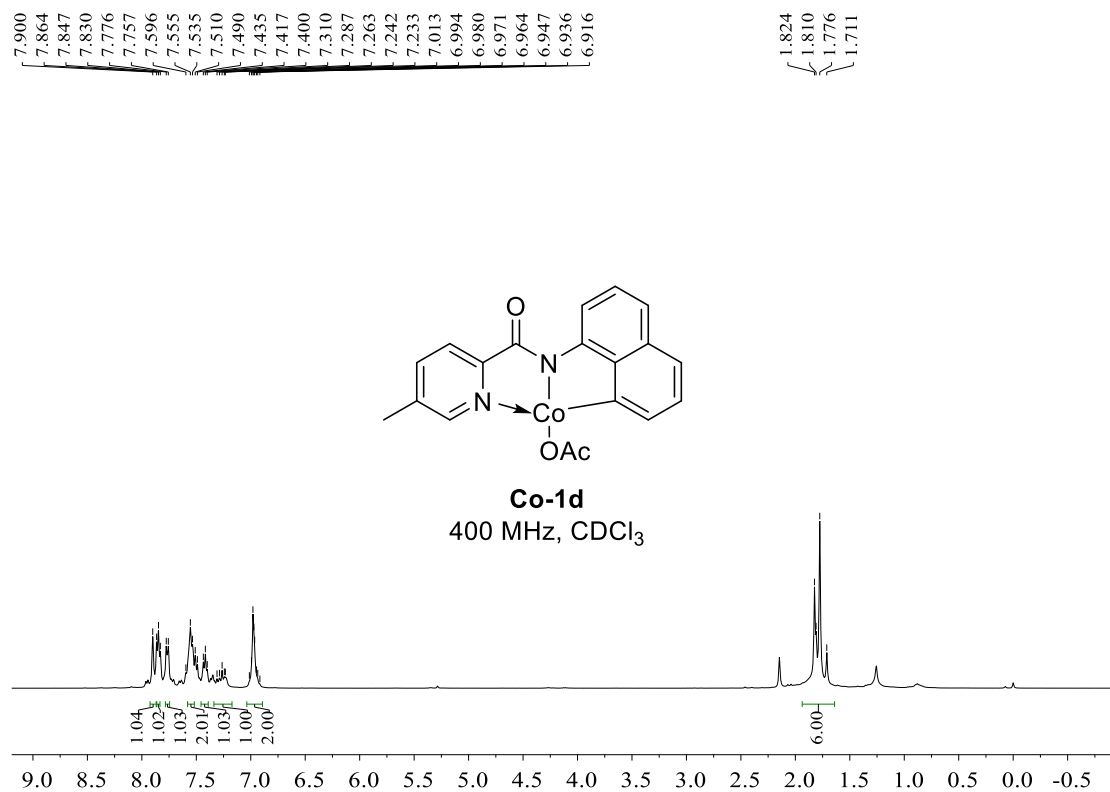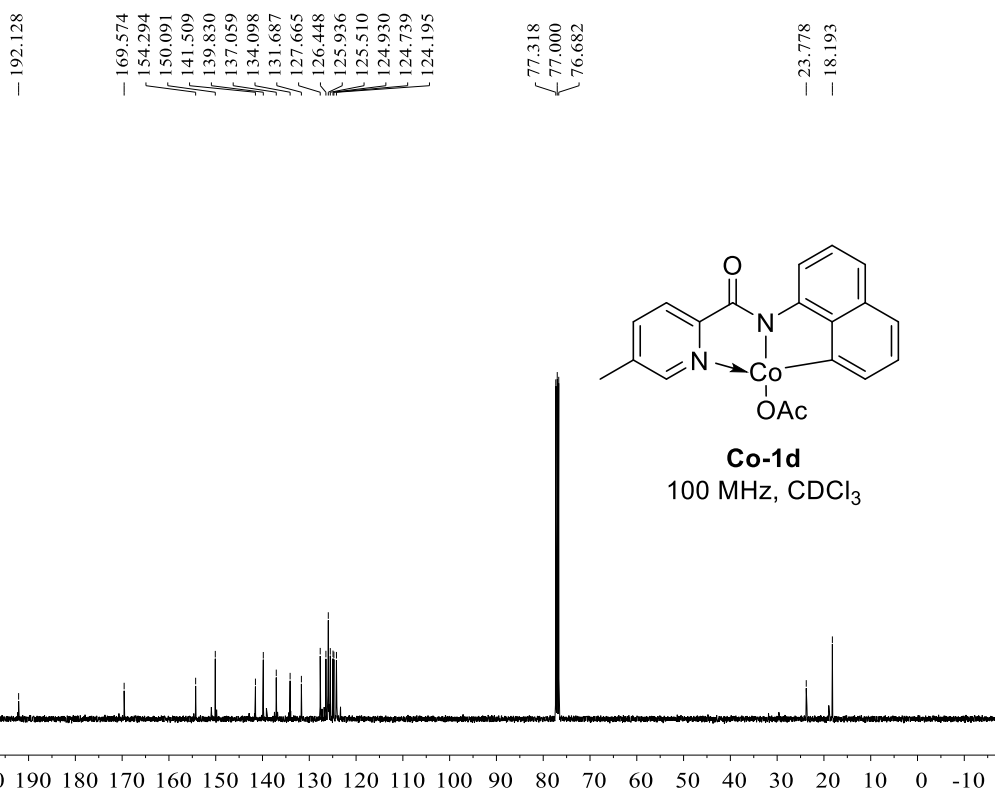

## 10. Failure examples of C–H bond acyloxylation.

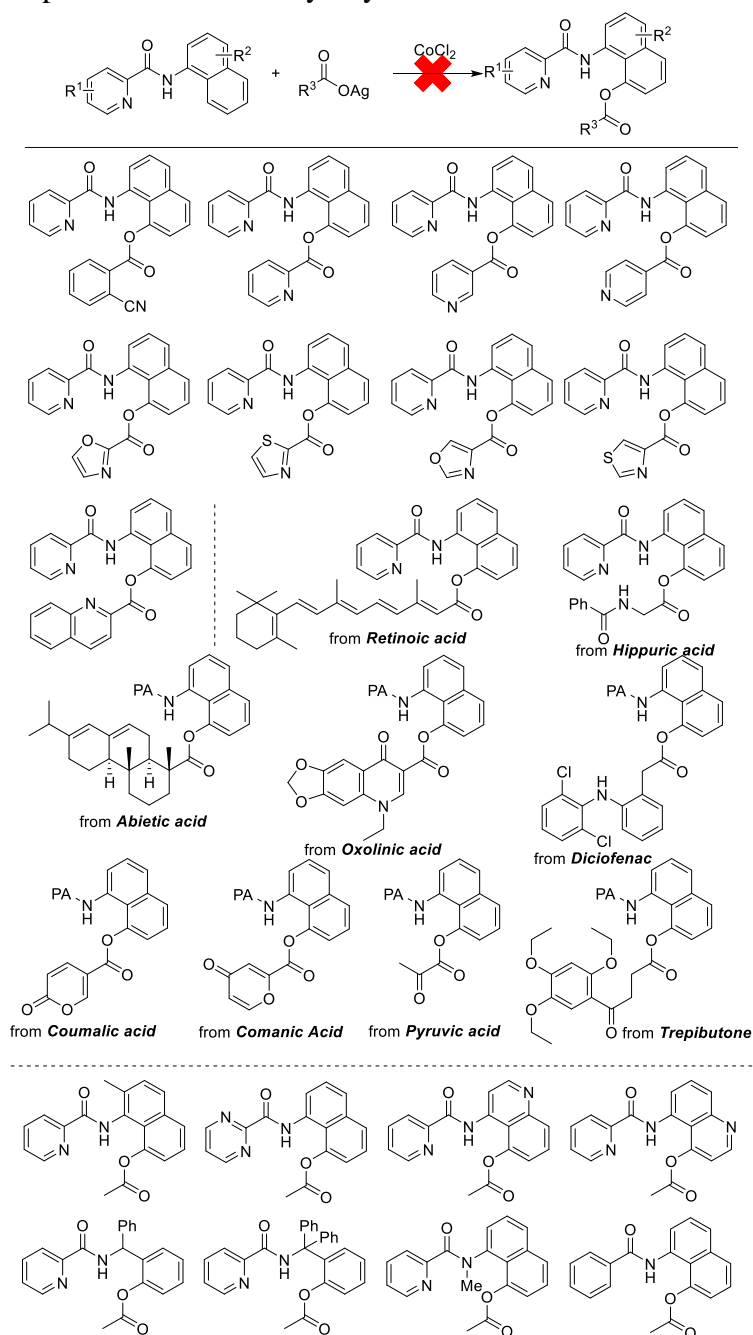



## 11. References

- 1 (a) J.-Y. Lan, H.-S. Xie, X.-X. Lu, Y.-F. Deng, H.-F. Jiang, W. Zeng, *Org. Lett.* **2017**, *19*, 4279; (b) J. Ying, L.-Y. Fu, G.-Q. Zhong, X.-F. Wu, *Org. Lett.* **2019**, *21*, 5694; (c) Y. Yao, Q. Lin, W. Yang, W. Yang, F. Gu, W. Guo, D. Yang, *Chem. Eur. J.* **2020**, *26*, 5607.
- 2 K. J. Alexander, M. McConville, K. R. Williams, K. V. Luzyanin, I. A. O'Neil, R. Cosstick, *Chem. Eur. J.* **2018**, *24*, 3013.
- 3 L. Grigorjeva, O. Daugulis, *Angew. Chem. Int. Ed.* **2014**, *53*, 10209.
- 4 L. Wang, C. W. Barth, M. Sibrian-Vazquez, J. O. Escobedo, M. Lowry, J. Muschler, H. Li, S. L. Gibbs, R. M. Strongin, *ACS Omega* **2017**, *2*, 154.
